# Supplementary material for: A Split Biotin Ligase Approach to Revealing Proteins Associated with Oligomeric Alpha-Synuclein During Aggregation
Source: Research Square preprint supplement (doi:10.21203/rs.3.rs-7697442/v1), 2025-10-17
Supplement: Supplementary file 1 [file 0f4acb56aa38a7e282171d92.xlsx]

## Sheet: notes
Scientific Reports
A Split Biotin Ligase Approach to Revealing Proteins Associated with Oligomeric Alpha-Synuclein During Aggregation
Analiese R. Fernandes1,2, Abigail P. Owen2,3, Ayman H. Faroqi1,2, Jannifer Lee2, Gunveen S. Sachdeva4, 5, Dmytro Morderer2, Cody Hoffmann6, Benjamin Madden6, Shuwen Zhang7, Yingxue Ren8, Suelen L. Boschen1,2, Akhilesh Pandey4,5, Wilfried Rossoll1,2, Pamela J. McLean1,2*
1Mayo Clinic Graduate School of Biomedical Sciences, FL, USA
2Mayo Clinic Department of Neuroscience, FL, USA
3Mayo Clinic Office for Non-Clinical Education Programs, FL, USA
4Mayo Clinic Department of Laboratory Medicine and Pathology, MN, USA
5Manipal Academy of Higher Education, Manipal, India
6Mayo Clinic Proteomics Core, MN, USA
7Mayo Clinic Department of Quantitative Health Sciences, MN, USA
8Mayo Clinic Department of Quantitative Health Sciences, FL, USA
* Corresponding author
Correspondence: mclean.pamela@mayo.edu
Notes:
Update gene names listed for Accession IDs: P84243, P68431, Q71DI3, P62805, Q8N511 to be accurate according to Uniprot ID Mapping (https://www.uniprot.org/id-mapping) Accession to Gene Names, Accessed 8.4.2025: Accession: P84243 <- H3-3A, H3-3B. Accession: P68431 <- H3C1, H3C2, H3C3, H3C4, H3C6, H3C7, H3C8, H3C10, H3C11, H3C12. Accession: Q71DI3 <- H3C13, H3C14, H3C15. Accession: P62805 <- H4C1, …
Throughout this code and exported tables, 'FL or F.lipo = Syn-BirA* without PFFs. SL or S.Lipo = Split Syn-BirA* without PFFs. FP or F.PFF = SynBirA* + PFFs. SP or S.PFF = Split Syn-BirA* + PFFs.
Purple and green sheets are direct exports from R code.
White and blue Sheets are post-DEP/post-R download analysis performed within excel

## Sheet: Raw Protein Data
Accession	Gene Name	rawprot_FL1	rawprot_FL2	rawprot_FL3	rawprot_FP1	rawprot_FP2	rawprot_FP3	rawprot_NL1	rawprot_NL2	rawprot_NL3	rawprot_NP1	rawprot_NP2	rawprot_NP3	rawprot_SL1	rawprot_SL2	rawprot_SL3	rawprot_SP1	rawprot_SP2	rawprot_SP3
P37840	SNCA	1.84559e+09	1.70105e+09	1.46828e+09	2.26255e+09	2.28331e+09	1.27004e+09	2.51085e+07	2.88298e+07	3.42041e+07	2.52471e+08	3.1465e+07	7.97816e+07	1.82926e+10	1.68772e+10	1.15967e+10	1.53735e+10	1.35869e+10	8.56193e+09
P21333	FLNA	7.98968e+08	6.65268e+08	5.10275e+08	6.71628e+08	7.95573e+08	4.05582e+08		1.81774e+08			9.00141e+07	2.36563e+08	1.37268e+09	1.23908e+09	7.6135e+08	1.2588e+09	9.25684e+08	6.23309e+08
P60709	ACTB	4.3878e+08	5.41026e+08	4.719e+08	2.86375e+08	5.42996e+08								4.56913e+08	3.13222e+08	2.06289e+08	1.18576e+09	9.40113e+08	3.36514e+08
Q09666	AHNAK	3.0764e+08	2.10434e+08	1.43925e+08	2.75456e+08	3.00264e+08	1.30493e+08							9.17862e+08	7.90666e+08	4.96909e+08	7.75433e+08	6.21329e+08	3.40901e+08
P14618	PKM	2.50293e+08	6.69469e+08		4.78341e+08	2.20647e+08	1.0142e+08							3.36905e+08	1.48469e+08	1.11153e+08	4.54435e+08		5.27385e+08
P04406	GAPDH	2.0907e+08	3.24169e+08			1.4899e+08	6.30682e+07							1.92026e+08	9.03988e+07	7.51869e+07	4.38457e+08
P68104	EEF1A1	2.0744e+08	3.00236e+08	2.66081e+08	2.33792e+08	1.78329e+08	1.03105e+08							2.8141e+08	1.55617e+08	7.55043e+07	4.27412e+08	3.65511e+08	2.35011e+08
Q16778	H2BC21	1.99943e+08	7.04899e+07	2.06839e+07	4.68684e+07	1.71198e+08	8.83323e+07							3.89609e+07	1.50119e+08	1.31109e+08	5.05435e+07	5.20107e+07	7.56882e+07
P62805	H4C1, H4C2, H4C3, H4C4, H4C5, H4C6, H4C7, H4C8, H4C9, H4C10, H4C11, H4C12, H4C13, H4C14, H4C15, H4C16	1.59891e+08	2.56061e+08	1.19863e+08	1.39045e+08	1.55399e+08	5.72743e+07							3.04221e+08	1.33657e+08		6.87771e+08		2.64833e+08
Q6FI13	H2AC18	1.5357e+08		1.36983e+08				3.00842e+08	1.87939e+08						5175930	1.18102e+08		4.73024e+08	1.79138e+08
Q96RQ3	MCCC1	1.41114e+08	1.11797e+08	5.05862e+07	1.44146e+08	1.04758e+08	4.77841e+07	1.69999e+08	106339075	4.94335e+07	1.56047e+08	4.32989e+06	2.37372e+07	4.26413e+07	4.80506e+07	2.53837e+07	4.30204e+07	6.11789e+07	2.55728e+07
P08670	VIM	1.1453e+08	1.21971e+08	7.4005e+07	6.94857e+07	1.0573e+08	4.36072e+07							2.40281e+08	1.53839e+08	1.00154e+08	4.97686e+08	3.71289e+08	1.25206e+08
P84243	H3-3A, H3-3B	8.93791e+07													5.56073e+07		3.55504e+08	3.18487e+08	239969
P05165	PCCA	8.75102e+07	6.48495e+07	3.18989e+07	56879120	95735049	3.79355e+07	3.52424e+07	4.68893e+07	10907758	4.69045e+07	4403024	10442353	5.64638e+07	4.59616e+07	3.21314e+07	4.10468e+07	5.79628e+07	3.18238e+07
P35579	MYH9	5.9579e+07	1.63325e+08	8.26888e+07	8.05831e+07	5.18634e+07	2.01884e+07							7.34435e+07	3.04668e+07	3.32264e+07	1.28001e+08	1.10457e+08	1.4692e+08
P11498	PC	5.76909e+07	1.6252e+08	4.24835e+07	57295455	6.15779e+07	7.14698e+07	2.35015e+08	1.14355e+08	1.04358e+08	1.44851e+08	4194646	8.52882e+07	5.16373e+07	6.64162e+07	5.49797e+07	7.93875e+07	1.25541e+08	27956472
P08238	HSP90AB1	5.49616e+07	6.32362e+07	4.55842e+07	3.11838e+07	4.76379e+07	2.67526e+07							6.65503e+07	3.11832e+07	1.24815e+07	1.4456e+08	1.48847e+08	5.53064e+07
P11142	HSPA8	5.45519e+07	7.02824e+07	4.94495e+07	3.57884e+07	4.64839e+07	3.23892e+07							7.78405e+07	4.3629e+07	3.46261e+07	2.2324e+08	1.85483e+08	5.98439e+07
Q00839	HNRNPU	5.35375e+07	7.75582e+07	3.11865e+07	3.35973e+07	2.6393e+07	2.30255e+07							7.88147e+07	4.55112e+07	5.1043e+07	1.23448e+08	1.19407e+08	5.63436e+07
P07355	ANXA2	5.2153e+07	1.08267e+08	5.78441e+07	5.01554e+07	4.72558e+07	2.05358e+07							8.62065e+07	5.08668e+07	3.88767e+07	1.33541e+08	1.36144e+08	9.8595e+07
P09651	HNRNPA1	4.99769e+07	1.03796e+08	4.39084e+07	6.07548e+07	4.87172e+07	2.06155e+07							7.39644e+07	2.75488e+07	2.09085e+07	1.16193e+08	1.50521e+08	8.46014e+07
Q08211	DHX9	4.98671e+07	1.36782e+08	7.73066e+07	8.0347e+07	4.48645e+07	2.05138e+07							6.87645e+07	3.0567e+07	2.52213e+07	9.49299e+07	1.0976e+08	1.42333e+08
Q6P2Q9	PRPF8	4.55523e+07
Q05639	EEF1A2	4.53629e+07	7.39746e+07	5.2505e+07	4.26102e+07	3.24919e+07	1.73979e+07							3.31018e+07	1.70224e+07	8.66887e+06	5.38315e+07	3.50761e+07	7.43261e+07
P06748	NPM1	3.73524e+07	4.63818e+07	3.08087e+07	2.44859e+07	4.10887e+07	1.67868e+07							5.68803e+07	3.05621e+07	2.75031e+07	1.55855e+08	1.2495e+08	4.68083e+07
Q06830	PRDX1	34899551	5.96938e+07	3.40414e+07	4.38032e+07	2.87586e+07	1.19655e+07							4.66976e+07	1.69154e+07	1.48057e+07	7.14352e+07		3.51644e+07
P19338	NCL	2.70421e+07	4.65745e+07	28271420	2.45805e+07	3.04373e+07	1.09066e+07							3.42851e+07	1.66026e+07	9.70944e+06	7.6352e+07	6.75963e+07	2.79208e+07
Q02878	RPL6	2.57099e+07	4.98886e+07	3.07801e+07	3.57208e+07	2.46741e+07								2.95032e+07	1.16217e+07
P11413	G6PD	2.36772e+07	1.11646e+08	4.66331e+07	3.32462e+07	2.186e+07	1.08135e+07								6.96095e+06	3.65788e+06		1.59642e+07
P15880	RPS2	2.3462e+07	2.53111e+07	1.3626e+07	3.52945e+07	2.03064e+07	8.40827e+06							2.2103e+07	1.15585e+07	7.76502e+06	4.80324e+07	3.14465e+07	1.75332e+07
P29692	EEF1D	2.25723e+07	1.46099e+07	1.19665e+07	1.38472e+07	1.72935e+07	8.06679e+06							5.58848e+06	2.86932e+06	2.83924e+06	1.36573e+07	1.50798e+07	4.20695e+06
P49327	FASN	2.13132e+07	4.92543e+07	1.81867e+07	1.76357e+07	1.88049e+07	5.82408e+06							5.58456e+07	4.41813e+07	3.35972e+07	5.16137e+07	3.75229e+07	3.75247e+07
P49773	HINT1	2.11307e+07	4.16439e+07	2.25396e+07	2.54624e+07	1.58366e+07	7.34517e+06							1.82058e+07	1.167e+07	7.24593e+06	2.23764e+07	1.62976e+07	2.19316e+07
P67936	TPM4	2.04758e+07	1.68385e+07	1.93368e+07	1.02433e+07	1.71598e+07	6.14056e+06							2.74732e+07	1.44055e+07	1.16768e+07	5.70987e+07	7.25952e+07	1.27881e+07
Q15233	NONO	2.03644e+07	2.83473e+07	2.27989e+07	1.47829e+07	3.04465e+07	2.26199e+07							2.67068e+07	2.5913e+07	3.19961e+07	4.06034e+07	3.1958e+07	2.05412e+07
Q7L014	DDX46	1.95916e+07	2.81625e+07	1.44666e+07	2.38856e+07	1.54203e+07	8022546							1.64722e+07	1.18752e+07	7.2491e+06	1.67234e+07	1.48173e+07	1.32286e+07
O75821	EIF3G	1.95818e+07	6.11669e+07	4.16183e+07	2.93266e+07	1.46825e+07	7.67849e+06							1.70831e+07	7.11007e+06	6.59254e+06	1.57756e+07		3.15281e+07
Q9Y5K6	CD2AP	1.91883e+07	1.36729e+07	1.13072e+07	1.70906e+07	1.78697e+07	9.6332e+06							2.07813e+07	1.93714e+07	9.98552e+06	1.46878e+07	8.43848e+06	6.0653e+06
P13639	EEF2	1.90833e+07	6.21764e+07	1.78852e+07	1.43682e+07	1.88902e+07	8.51393e+06							2.88309e+07	1.29992e+07	8.68661e+06	7.99959e+07	77808180	2.30234e+07
P12270	TPR	1.86881e+07	1.84102e+07	1.36615e+07	2.00393e+07	1.76251e+07	8.42166e+06							5.06053e+07	4.55722e+07	2.945e+07	4.2024e+07	4.17187e+07	2.48349e+07
P37802	TAGLN2	1.82326e+07	1.65957e+07	1.12123e+07	1.22585e+07	1.6867e+07	8.14699e+06							3.83385e+07	3.01815e+07	1.60321e+07	4.67956e+07	4.0508e+07	1.58212e+07
Q15365	PCBP1	1.7146e+07				1.4245e+07	4.93027e+06										2.41924e+07
P15531	NME1	1.68689e+07				6.08992e+06									2.19558e+06		1.32273e+07
Q9UBF2	COPG2	1.67623e+07	1.26383e+07	9.45207e+06	1.37636e+07	1.42628e+07	6.70302e+06							2.82871e+07	2.15512e+07	1.4182e+07	2.45523e+07	1.49649e+07	1.15562e+07
P07737	PFN1	1.61172e+07	4.03553e+07	2.11974e+07	2.59396e+07	1.67978e+07	6.94727e+06							2.17887e+07	1.25057e+07	8.7891e+06	2.80265e+07	2.92185e+07	2.12736e+07
Q5QNW6	H2BC18	1.61066e+07	2.96934e+06	3.09145e+06	1.37719e+06	2.0326e+07	5.61644e+06								1.19766e+06	806991	562778		6.64495e+06
P61160	ACTR2	1.56673e+07				1.26016e+07
Q15149	PLEC	1.54877e+07	4.57958e+07	1.84806e+07	1.94974e+07	1.68563e+07	4.53272e+06			7.60207e+07				2.55673e+07	9.54899e+06	6.76559e+06	9.76975e+07	7.75777e+07	4.24185e+07
O75369	FLNB	1.53437e+07	4.47495e+07	2.27947e+07	2.62867e+07	1.46893e+07	5.73351e+06							1.81456e+07	7.65622e+06	5.6264e+06		2.23784e+07	2.29948e+07
Q16666	IFI16	1.4663e+07	3.50491e+07		2.30736e+07	1.21831e+07	4.27153e+06							1.30294e+07	4.76053e+06	2.52545e+06	1.45363e+07		1.72724e+07
Q13501	SQSTM1	1.46107e+07			1.26502e+07		4.66803e+06							1.86467e+07	1.53463e+07	2.07283e+07	4.25001e+07	3.13243e+07	2.01845e+07
O94842	TOX4	1.45518e+07	1.15204e+07	9.88528e+06	1.58031e+07	1.34856e+07	6.34226e+06							2.64244e+07	1.94394e+07	1.2836e+07	2.52124e+07	2.20366e+07	9.64837e+06
P55010	EIF5	1.34583e+07	1.45392e+07	9.51381e+06	1.44077e+07	1.38846e+07	6.66488e+06							2.40193e+07	1.53622e+07	1.01323e+07	1.73088e+07	1.1518e+07	9147593
Q14247	CTTN	1.2391e+07	6.77752e+06	5.66779e+06	9.3996e+06	1.38605e+07	4.55544e+06		211078					1.76494e+07	1.74805e+07	1.07819e+07	1.84059e+07	1.12251e+07	6.3616e+06
P55072	VCP	1.23587e+07			1.28714e+07	7.72502e+06	4.79468e+06							1.25571e+07	4.38042e+06	3.37208e+06	3.2324e+07
Q7KZF4	SND1	1.23224e+07	3.49477e+07	1.98859e+07	2.08944e+07	1.35225e+07	5.23858e+06							1.2555e+07	6.10608e+06	3.82089e+06	1.71465e+07	1.2806e+07	1.04868e+07
P68032	ACTC1	1.19284e+07	1.23085e+07	891853	6.64609e+06	1.16274e+07								1.38792e+07	6.255e+06	3372772	4.90983e+07	3.87546e+07	1.99706e+07
P07900	HSP90AA1	1.16472e+07	1.62714e+07	1.20556e+07	8.05672e+06	8.55873e+06	5.12292e+06							1.93163e+07	10480312	1.94874e+07	4.63721e+07	3.54251e+07	1.57736e+07
P84098	RPL19	1.13624e+07	2.32439e+07	1.23499e+07	1.31366e+07	1.75511e+07	9.0032e+06							1.2983e+07	8.93141e+06	9.5061e+06	2.29362e+07		1.2529e+07
P61247	RPS3A	1.07607e+07	1.12433e+07	7.89784e+06	5.803e+06	1.07136e+07	3.43923e+06							1.76851e+07	8.12082e+06	5.64297e+06	4.01827e+07	3.9699e+07	9.44343e+06
P26038	MSN	1.06658e+07	1.5892e+07		1.04507e+07	1.56366e+07	3.88632e+06							1.59454e+07		4.86063e+06	3.50675e+07	3.37776e+07	2.16174e+07
Q86XP3	DDX42	1.00066e+07	5.74062e+06		2.44091e+06	1.34498e+06	403826							798197	721737	1.95051e+06
P27635	RPL10	9.50121e+06
Q8NC51	SERBP1	9.39152e+06	7.18525e+06	5.88148e+06	7.81775e+06	8.04988e+06	1.35293e+06							1.31797e+07	9.56638e+06	5.95603e+06	2.06507e+07	1.67353e+07	5.37257e+06
Q9UHB6	LIMA1	9.3778e+06	1.77209e+07	7.97712e+06	1.31315e+07	1.23611e+07	4.88445e+06							2.86825e+07	1.88649e+07	1.24118e+07	2.73629e+07	2.71282e+07	1.50417e+07
P42166	TMPO	9.00851e+06	3.68129e+07	1.7052e+07	1.68326e+07	8.28207e+06								1.10734e+07	168935		1.47278e+07	1.78608e+07	2.09996e+07
Q01518	CAP1	8.69574e+06	2.05848e+07	1.18051e+07	8.9939e+06	8.10476e+06	3.72009e+06							1.18316e+07	2.96199e+06	2.88987e+06	1.91006e+07	1.75305e+07	1.67888e+07
P78344	EIF4G2	8.61652e+06	9.01056e+06		6.82362e+06	5.52734e+06	5.34852e+06							7.04554e+06	5.92614e+06	4.30647e+06	7.85564e+06	4.79009e+06	4.94188e+06
O15347	HMGB3	8.27291e+06	2.84683e+07	1.39054e+07	2.32545e+07	1.20936e+07	2.74544e+06							1.02089e+07	2.8987e+06
Q9UHR5	SAP30BP	8.0658e+06	7.32202e+06	5.95364e+06	8.02715e+06	8.53853e+06	4.27458e+06							1.61079e+07	1.28532e+07	9.88184e+06	1.33642e+07	1.11351e+07	8.67551e+06
Q68CZ2	TNS3	7.7103e+06	2.16523e+07	8.12492e+06	1.32826e+07	4.62896e+06	2.00806e+06			3.05795e+07				9.44597e+06	4.97744e+06	3.92148e+06	5.11722e+06	7.80397e+06	1.82596e+07
Q99460	PSMD1	7.64128e+06	3.55962e+07	1.43865e+07	1.37151e+07	7.62534e+06								7.49114e+06	3.7698e+06	3.80071e+06	1.06306e+07	1.16846e+07	2.42366e+07
Q99426	TBCB	7462201		1.53142e+07			2.6837e+06							9.09854e+06		2.72619e+06	9.37861e+06	6.70793e+06
P98175	RBM10	7.20682e+06	2.94581e+06	1.64406e+06	4.97364e+06	3.04336e+06	2.51985e+06							8.84635e+06	5.82129e+06	3.90974e+06	7.10711e+06	2.44989e+06	2.45788e+06
P50990	CCT8	7.195e+06	2.0187e+07	7.44661e+06	6.41496e+06	5.41763e+06	2.00812e+06							7.652e+06	1.49307e+06	1.32768e+06	2.2843e+07	1.80613e+07	9.48222e+06
P54136	RARS1	6.90742e+06	1.96576e+07	9.98927e+06	9.33094e+06	7.35147e+06	2.66389e+06							1.36124e+07	7.93601e+06	5.25601e+06	1.51522e+07	1.27401e+07	1.23554e+07
P50479	PDLIM4	6842398	3.92715e+06	3.06851e+06	3.85315e+06	6.54336e+06	2837645							1.03864e+07	6.04063e+06		1.2956e+07	9515140	4624906
Q9Y2J2	EPB41L3	6.76737e+06	5.66171e+06	4.25582e+06	6.28708e+06	7.0363e+06	4.07544e+06							1.1626e+07	2.59046e+07	5.99098e+06	9.70608e+06	9.27048e+06	6.23316e+06
Q07065	CKAP4	6.74935e+06	1.55592e+07	8.88984e+06	5.27155e+06	1.05613e+07	2.93177e+06							1.16959e+07	3.84232e+06	3.41531e+06	3.8238e+07	3.25672e+07	1.05136e+07
O43809	NUDT21	6.72461e+06		1.48536e+07		1.11422e+07										3.17343e+06	1.19039e+07
Q9P0K7	RAI14	6.38603e+06	6.08477e+06	4.14e+06	5.86689e+06	6.91704e+06	2.50363e+06							3.03352e+07	2.24903e+07	9.64869e+06	2.33163e+07	1.83858e+07	7.48759e+06
P49792	RANBP2	6.37058e+06	2.68908e+07		9.21826e+06	5.31936e+06	1.92583e+06							7.06749e+06	3.60333e+06	9.43006e+06	9.8457e+06	3.09822e+07	2.32459e+07
P30419	NMT1	6072381													2.78133e+06	1.50472e+06	5.08962e+06	4413839
Q9Y2W1	THRAP3	5.8851e+06	6.66406e+06	3.34697e+06	6.93392e+06	4.8776e+06	1.40406e+06							5.37825e+06	3.27989e+06	2.72077e+06	6.04572e+06	5.01399e+06	5.11966e+06
Q96JH7	VCPIP1	5.87805e+06	5.81973e+06	4.56925e+06	5.07397e+06	5.89169e+06	2.57023e+06							5.16339e+06	3661432	2.06019e+06	3.77365e+06	2.75497e+06	3.24903e+06
Q9NZC7	WWOX	5.84181e+06	298928	2.77619e+06	4.9756e+06	164161								5.98554e+06	4401825	2.90854e+06	4.6608e+06	5408060	2.40766e+06
Q93009	USP7	5.82796e+06	1.51952e+07	4.55087e+06	1.56619e+07	7.74807e+06	1.85241e+06							8.48898e+06	6.27661e+06	2.29717e+06	5.31287e+06	8.18316e+06	1.26644e+07
Q07960	ARHGAP1	5.75811e+06												5.86436e+06	2.21129e+06		4.29724e+06
P47712	PLA2G4A	5.58445e+06	5.42593e+06	1.68243e+06	5.84054e+06	3.50696e+06	1.4522e+06							6.2593e+06	5.43829e+06	3.3781e+06	4.40237e+06	6.14648e+06	9.09915e+06
P60866	RPS20	5.56008e+06	7.30789e+06	2.06164e+06	3.64526e+06	4.33495e+06	1.48064e+06							8.5409e+06	3.82011e+06	722806	2.29814e+07	1.75215e+07	6.36355e+06
P42224	STAT1	5.52313e+06	4891842	3924633	4809000	6.10027e+06	2.6105e+06							8691955	7.42954e+06	4513307	7.98667e+06	6.12857e+06	3.8059e+06
Q05682	CALD1	5.50188e+06	2.93263e+06	3.4791e+06	6.18826e+06	8.186e+06	2.75562e+06							1.149e+07	8.07077e+06	3.63366e+06	8.84277e+06	7.68974e+06	1.84115e+06
Q8TEQ6	GEMIN5	5.43329e+06	6.34127e+06	3.30607e+06	946097	5.12854e+06	2.33251e+06							4.23276e+06	2.60208e+06	1.69731e+06	2.64763e+06		1868733
P25685	DNAJB1	5.42962e+06	5.73033e+06	5.33386e+06	5.78019e+06	5.90675e+06	2.9728e+06							1.05948e+07	7.97691e+06	4411344	9.28622e+06	7.69881e+06	4.15748e+06
O60664	PLIN3	5.04097e+06	4.49507e+06	1.05392e+06	815844	4.47532e+06	2.26845e+06							9.88545e+06	5.213e+06	6.13846e+06	1.00651e+07	3.91613e+06	3.67771e+06
Q9P013	CWC15	5.0078e+06	5217327	3.7972e+06	5.73478e+06	5.59087e+06	1.70929e+06							5000329	3.19301e+06	2.06272e+06	4.69068e+06	3.18967e+06	1.44757e+06
Q13435	SF3B2	4.99319e+06	1.04673e+06	1.1076e+06	3.69336e+06	4.06007e+06	1.11799e+06							1.43944e+07	6.03688e+06	3.26717e+06	1.64755e+07	6.84557e+06	2.20883e+06
P83731	RPL24	4.91969e+06	1.30016e+07	6.43614e+06	8.48523e+06	3.33108e+06	1.33603e+06							9.1947e+06	2.49854e+06	2.59374e+06	1.2792e+07	1.16336e+07	7.6583e+06
P11940	PABPC1	4.78482e+06	1.41002e+07	5.63638e+06	4.40659e+06	5.47855e+06	2.18906e+06							6.1719e+06			2.23521e+07		7.54277e+06
Q9H307	PNN	4.72815e+06	5.16969e+06	3.3137e+06	6.95653e+06	6.00036e+06								1.91567e+07	1.48638e+07	1.06407e+07	2.31985e+07	1.71575e+07	1.14427e+07
Q9Y265	RUVBL1	4.60241e+06	1.0137e+07	5.82417e+06	5151030	4.73055e+06	2.27641e+06							3.69974e+06	2.04576e+06	1.12832e+06	5.88669e+06	5.56837e+06	3.55881e+06
P51610	HCFC1	4.59595e+06	5.01086e+06	2.45745e+06	6.08795e+06	7.20953e+06	1.85741e+06							6.39225e+06	7.86594e+06	5.01412e+06	6.95593e+06	3.38551e+06	2.64566e+06
Q04637	EIF4G1	4.52069e+06	1.04587e+07	3.115e+06	7.26665e+06	8.58905e+06	4.00229e+06							1.18915e+07	8.90346e+06	4.98538e+06	4.29881e+06	1.00715e+07	4.28934e+06
O15173	PGRMC2	4.36398e+06	5.87337e+06	2.56336e+06	2060986	6.0684e+06	185653							8.89477e+06	2232594	3.68122e+06	1.02818e+07	5.80274e+06	4.31969e+06
Q13442	PDAP1	4.36082e+06	5.55956e+06	1.65679e+06	4.40322e+06	4.22527e+06	1.87883e+06							7.00752e+06	7.26268e+06	1.928e+06	7.20728e+06	5.32955e+06	1.70949e+06
O00193	SMAP	4.32947e+06	4.17848e+06	3.78888e+06	4.7817e+06	4.58571e+06	2.62634e+06							5.0904e+06	3.14625e+06	2.31158e+06	4.29672e+06	3.13203e+06	2.38982e+06
P23246	SFPQ	4.2569e+06		3.82655e+06	4.06885e+06	1.0441e+07								8.19456e+06	4.62861e+06	4.34472e+06
Q14980	NUMA1	4.13437e+06	5.90294e+06	3.47389e+06	4.09607e+06	4.29205e+06	1735756							4.5265e+06	2.93682e+06	1.91426e+06	6.58486e+06	5.68028e+06	5.8307e+06
P48444	ARCN1	4.00291e+06	1.77508e+07	1.11185e+07	8.51855e+06	4.73786e+06	2.34831e+06							4.66116e+06	2.44578e+06	2.07183e+06	6.86303e+06	6.48551e+06	8.707e+06
Q15942	ZYX	3.98261e+06	2.90195e+06	1.61134e+06	3.94041e+06	4.24165e+06	1.37301e+06							4.21695e+06	2.99502e+06	1.81874e+06	5.2e+06	1.87746e+06	1.21879e+06
Q8N163	CCAR2	3.91791e+06				3.66019e+06	1.07448e+06							4.52838e+06	2.21774e+06	1.78384e+06	9.37222e+06
Q9HCS7	XAB2	3656810	3.7485e+06	2.4946e+06	3.35286e+06	3.88052e+06	1955731							4.9163e+06	3.09577e+06	2.37477e+06	2.88772e+06	3.69206e+06	5.05534e+06
O00541	PES1	3.60003e+06			8.51545e+06	4.69151e+06								7.112e+06	3.08328e+06	1.63626e+06
Q9UIF9	BAZ2A	3.53744e+06	2778697	1.51486e+06	2.625e+06		685294								2.02433e+06	446718	2.22985e+06
Q86T24	ZBTB33	3.46354e+06		1655109	2.4918e+06	3.29003e+06	1.63994e+06							4.98016e+06	3.62429e+06	3.45014e+06	3.21671e+06	3.26873e+06	2.48601e+06
Q7Z4V5	HDGFL2	3.45643e+06	1.12285e+07	5225272	5.30276e+06	3.2586e+06	1.40378e+06
O75533	SF3B1	3.28601e+06	2.67787e+07	1.41762e+07	1.13674e+07	7.36211e+06	1.57731e+06				1.52329e+07			1.10101e+07	2.38581e+06	2.06592e+06	1.65976e+07	6.2111e+06	2.29034e+07
Q9BQ61	TRIR	3.20904e+06	2.70795e+06	1.05936e+06	806230	1.38499e+06	1.01054e+06							3.85034e+06	3.01403e+06	2.3989e+06	1.90333e+06	1.15316e+06	680384
P20671	H2AC7	3.15519e+06		1.15592e+07					3.44359e+06						1.2465e+08	977642		4634437	1.04749e+06
P15311	EZR	3.1408e+06	1.71662e+07	9.1028e+06	6.25984e+06	3.92692e+06	832382							4.61927e+06	730397	1.31733e+06	7.96339e+06	7.4781e+06	8.14299e+06
Q15056	EIF4H	3.13919e+06	2.58683e+06	1.85244e+06	3.00028e+06	3.20842e+06	834251							3.45355e+06	2.21594e+06	1.84814e+06	5.88374e+06	5.16327e+06	2.14267e+06
Q9P258	RCC2	3.08364e+06	1.1153e+07		2.85021e+06	2.70298e+06								3.89412e+06	194097	75753.5	2.7659e+06		7134867
Q9Y266	NUDC	3.0669e+06	2.27002e+06	50694.8	1.27798e+06	3.06944e+06	980132							6.71021e+06	3.5379e+06	2.88273e+06	8.38731e+06	8.03627e+06	1.81352e+06
P09661	SNRPA1	3.05282e+06	6.86561e+06	280897	3.81228e+06	3.09919e+06	1.22134e+06							2.61577e+06	144848	951397		4.00598e+06	2.07311e+06
Q9Y490	TLN1	3.03018e+06	1.99649e+07	5.89414e+06	5.17025e+06	5.99797e+06	1.96921e+06							8.14385e+06	4.32489e+06	3.90474e+06	1.37051e+07	8.69013e+06	5.98946e+06
O60264	SMARCA5	3.00134e+06		7.41203e+06		3.39091e+06	1.61989e+06							4.79486e+06	1.28091e+06	2.29581e+06	9.48924e+06	8.41951e+06
P27816	MAP4	2.89632e+06	3.14059e+06	1.46426e+06	2.20492e+06	2.8197e+06	1.04266e+06							4.08513e+06	2.40492e+06	1.56237e+06	5.4421e+06	4.98249e+06	1.76116e+06
O75182	SIN3B	2.84963e+06	3.05328e+06		2200645	3297743	1.01269e+06							4.04445e+06	2052860	2.25833e+06	3.11792e+06	3.10747e+06	1.8849e+06
Q9UHX1	PUF60	2.79111e+06	3.47365e+06	1.94593e+06	2.38245e+06	4.04218e+06	1.41777e+06							3.605e+06	2.47788e+06	1.55559e+06	4.2458e+06	3.88358e+06	1.45102e+06
O60563	CCNT1	2.76249e+06	3.14838e+06	2.17737e+06	2.90921e+06	3.96288e+06	1.82207e+06							2.67923e+06	2.6085e+06	1.82113e+06	1.50439e+06	1.23202e+06	2.19249e+06
P40121	CAPG	2.75229e+06	2.90117e+06	1.98583e+06	7.50027e+06	3.07274e+06	3.70513e+06							5.51515e+06	1.49157e+06	1.40075e+06	3.59354e+06	3.53734e+06	1.33351e+06
Q14764	MVP	2.69387e+06	4.35215e+06		397178	1.5647e+06	1.11281e+06							2.70513e+06	1.181e+06	588917	3.38705e+06	5.1464e+06	1.46796e+06
O43491	EPB41L2	2668441	1319878	1.31741e+06	1.90492e+06	772836								755115		289153		859872	225634
Q14677	CLINT1	2.64422e+06	7.15352e+06	3.25033e+06	3.53196e+06	2.55161e+06	881784							3.65462e+06	1.05805e+06	961979	2.14818e+06	1.97383e+06	5.90834e+06
Q96C19	EFHD2	2.56134e+06	3.63755e+06	1.2904e+06	2.4591e+06	3.84936e+06	91154.5							7.02211e+06	5.56748e+06	3.03174e+06	6.41165e+06	5.66223e+06	3.16799e+06
O95433	AHSA1	2.52631e+06	4.50073e+06	703787	208894	2.62287e+06	126088							560622	2.56066e+06	1.58537e+06	1.00373e+06	1.34518e+06	2.34079e+06
P07814	EPRS1	2.50738e+06	2.20721e+06	276496		1.92012e+06	528281							2.19329e+06	1.81023e+06	1.49166e+06	5.27136e+06	3.88097e+06
P31949	S100A11	2.47291e+06	6.24711e+06	3.02381e+06	3.17154e+06	2.4718e+06	917718							3.3664e+06	1.67601e+06	2.03876e+06	5.84252e+06	5.87395e+06	2.99244e+06
Q14258	TRIM25	2.43136e+06	2.78722e+06	1.68722e+06	1.65499e+06		1.14359e+06							1.63978e+06	4.53778e+06	2.73983e+06	4.63052e+06	2.03097e+06	1728466
Q8NI36	WDR36	2.40953e+06												2.90333e+06	1.01279e+06
P17096	HMGA1	2.39827e+06	2.44576e+06		984967		1.05439e+06							5.20312e+06	3.98697e+06	2.28727e+06	1.43524e+07		4.85284e+06
Q9H0L4	CSTF2T	2.35201e+06	1.23992e+06	1.77598e+06	969718	1.45354e+06	1.19867e+06							3.07744e+06	2885625	2.14565e+06	2394057	1.78629e+06	1.2434e+06
O15143	ARPC1B	2.308e+06	1.27109e+07
Q9UG63	ABCF2	2.29339e+06	6.10276e+06		3.47081e+06	1.82107e+06	266992							4.56986e+06	1.36945e+06	1.24195e+06	1.01688e+06		4.31791e+06
P27694	RPA1	2.24343e+06	4.52666e+06	1493976	1.78816e+06	2.30994e+06	939034							3.05256e+06	1139040	1.17858e+06	5.87273e+06	4.39712e+06	2.13996e+06
Q68CP9	ARID2	2.23931e+06				2.00039e+06									1.56899e+06
Q32MZ4	LRRFIP1	2.19434e+06	2.61512e+06	2.78717e+06	1.9545e+06	2.58626e+06	2.26848e+06							2.90862e+06	2.70762e+06	1.89973e+06	2.28338e+06	2.46763e+06	1.36629e+06
Q5TEC6	H3-7	2.18978e+06	165747	618900	683407	1.79157e+06	451429							2.97984e+06	1.50751e+06		9.7802e+06	7.68108e+06	1.03106e+06
P23946	CMA1	2.18611e+06	999455	549360	647131	3.51339e+06	617463	2.98213e+06	4.24412e+06	5.8815e+06	2.68201e+07	2.76354e+06	1.68634e+06	3.03597e+06	1.00189e+06	831009	348603	11767851	1.91055e+06
Q8IVF2	AHNAK2	2.16087e+06	3.19689e+06	135207	2.30666e+06	2.60364e+06	779404							2.4069e+07	1.59615e+07	8.88662e+06	1.60908e+07	1.1778e+07	3.92603e+06
P48556	PSMD8	2.15851e+06	4.28567e+06	3.24051e+06	4.37331e+06	2.75281e+06	1.23925e+06							5.10955e+06	3.25108e+06	2.54745e+06	4.33104e+06	4.00505e+06	3.44373e+06
Q14498	RBM39	2.15671e+06	1.06532e+07	5.53272e+06										3.34376e+06	1.85026e+06			3.7529e+06
Q5K651	SAMD9	2.14562e+06	2.81952e+06	191514	1692990	1.23019e+06	487248								1.01361e+06	557578
Q9UHB7	AFF4	2.14127e+06	1.31261e+06		930998	1.62273e+06	778348							1.08721e+06	1.44628e+06	530332	800256	907911
Q96N67	DOCK7	2.12554e+06	3.39871e+06		3.48197e+06	1.12497e+06								2.71155e+06	790172	643241			2497551
Q12792	TWF1	2.11823e+06		3.58446e+06	4.16133e+06	2699117	215137							4.16643e+06	1.23786e+06	1.26083e+06	3.85725e+06	2.80918e+06	8.98061e+06
P15822	HIVEP1	2.11655e+06			1.76312e+06	1534886	921928							3919267	4.80847e+06	2.37476e+06	3.59513e+06	2636886
Q16881	TXNRD1	2.09309e+06	2.6252e+06		995215	1.72853e+06	583011							2.37818e+06	1.27287e+06	1.02586e+06	6.94393e+06	6.36778e+06	1.38837e+06
P52597	HNRNPF	2.04976e+06	1.90246e+06	702974	811135	2.76947e+06	372737							4.30832e+06	1.68897e+06	1.71727e+06	7741888	7.28148e+06	6.92622e+06
Q13185	CBX3	2.00426e+06	3.33763e+06		4.50225e+06									2.56567e+06	1.37272e+06
Q9H5V9	STEEP1	1.98903e+06	1.74842e+06	381976	1.70266e+06	1.2917e+06								3.84349e+06	3.34981e+06	1314488	3.94541e+06	2.30544e+06	1.35023e+06
Q9UHD1	CHORDC1	1.91219e+06			1.20826e+06	1.35362e+06	888195							2.29532e+06	1.58896e+06	971657	1.42145e+06
Q14008	CKAP5	1.89558e+06	5.93613e+06	660279	2.51696e+06	3.58483e+06	968240							5.98837e+06	5.17178e+06	1.92407e+06	2.9054e+06	1.69799e+06	3.85511e+06
Q9Y2X3	NOP58	1.83626e+06	8.3812e+06	4.07927e+06	4.78731e+06	2.88464e+06	1288424							1226280	926700	702806
Q96HC4	PDLIM5	1.82209e+06	4.17898e+06	2.11646e+06	3.04811e+06	4.06574e+06	887201							6.53452e+06	4.19902e+06	3.08944e+06	5.83575e+06	4.04598e+06	3.47514e+06
Q9UPQ0	LIMCH1	1.79885e+06	983973	1444374	1.94809e+06	1.46461e+06	831125							235615	163212
P0C0S5	H2AZ1	1.78891e+06		1.0376e+06	754192	1.00633e+06	7.38077e+07							3.75752e+06	2.10376e+06	1.38536e+06	6742638	7870117	1.97945e+06
Q9UDY2	TJP2	1773888	1.87955e+06	1.28346e+06	2.00026e+06	1.98765e+06	688382							6.41997e+06	4.79085e+06	3.62164e+06	2.91504e+06	1.01871e+06	3.32905e+06
P22392	NME2	1.7653e+06	2.61726e+07		11001794	1.5493e+07	7.91259e+06							5.77701e+06	1.05829e+07	8.99496e+06	5.08423e+07	1.15665e+07	2.38603e+06
P50914	RPL14	1.76432e+06	6.04201e+06	3.1433e+06	5.15011e+06	3.03763e+06	940512			1.2564e+07				5.53187e+06	2.10577e+06	1.94942e+06	1.72748e+07		4.97129e+06
P23763	VAMP1	1.75712e+06	1.73979e+06	1.48323e+06	1675305	2.5022e+06	1.09577e+06							3.20211e+06	2674889	1.72606e+06		2.78443e+06	1.18372e+06
Q92945	KHSRP	1.75528e+06	2.64599e+06	1.1308e+06	1.14315e+06	1.87444e+06	80891.4							2.99153e+06	543050	535233	1.00965e+07	8.93011e+06	1.15093e+06
P31948	STIP1	1.74474e+06	3.49817e+06			2.63238e+06								9.73512e+06	1.93522e+06	821149	1.55581e+07	1.3181e+07	2.79315e+06
P06454	PTMA	1.7265e+06		183480		1.20154e+06	345719							2.3399e+06	1.32616e+06		6.98579e+06
Q12959	DLG1	1.71328e+06	2.16062e+06		1.77217e+06	2.26394e+06	1.04102e+06							1.21549e+06	997767	753751	1.00805e+06	912760	547116
P16949	STMN1	1.68878e+06	637305	898026	897164	1.17988e+06	481166							5.35822e+06	3.98893e+06	5.42364e+06	6.60331e+06	6.83442e+06	1.67025e+06
P55081	MFAP1	1678862	1.7345e+06	1.36845e+06	1.58294e+06	1872646	753078							1.28723e+06	1.16115e+06	741356	1.09209e+06	1.06766e+06	518126
Q8WWM7	ATXN2L	1.67494e+06	3.01866e+06	1.64253e+06	1.65328e+06	1976449	357353							2.01536e+06	1.74049e+06	906522	2.2749e+06	2.41179e+06	1.32997e+06
O00151	PDLIM1	1.65193e+06	972597		796513	1.97473e+06	305622							2.43313e+06	2.3052e+06	1.06532e+06	1.79673e+06	1.48927e+06	429322
O60443	GSDME	1.64211e+06	1.68135e+06	1.24781e+06	1.33772e+06	1.95708e+06	869358							3.14266e+06	2.55481e+06	1.70207e+06	2.55389e+06	1.73074e+06	1.38295e+06
Q9BTC0	DIDO1	1.59418e+06			1.35987e+06	1.4182e+06								1.20734e+06	2.05074e+06	1.45767e+06	2.00269e+06	2.21594e+06	774712
O43639	NCK2	1.58711e+06		1.44681e+06		1.90995e+06	938617							1.77792e+06	1.18379e+06	939613		787062	473055
O75179	ANKRD17	1.58674e+06	1.52654e+06	1.01914e+06	1.36132e+06	1.40815e+06	615904							1.58373e+06	1.08299e+06	621377	1.45557e+06	1.09618e+06	646225
Q9HB71	CACYBP	1.57591e+06	4.61549e+06	2.0769e+06	3.15145e+06	1.58111e+06	619970							1112701	1.21723e+06	440645	5.44685e+06	2.73036e+06	282599
Q8TA86	RP9	1.54986e+06	1.17481e+06	808728	842175	1.11043e+06								2.27939e+06	2.01888e+06	1.16665e+06	1847620	1.8758e+06	1.1878e+06
P13984	GTF2F2	1.54749e+06	1.12246e+06	460555		1.37969e+06	615309							1.96067e+06	1.331e+06	965477	1.68104e+06	1.04837e+06	696571
O75534	CSDE1	1.51955e+06	3.01953e+06	2.8204e+06			74546.9							500664	478461	414134	1.39054e+06	462169	557103
P20290	BTF3	1.49396e+06												1.18664e+06	503610		5.44921e+06	3.66732e+06	929177
P50851	LRBA	1.48774e+06	1.38276e+06	1.2303e+06	1.43242e+06	1.65839e+06	767276							2.17321e+06	1.99909e+06	1.29594e+06	1.85575e+06	1.93444e+06	904578
P31946	YWHAB	1.43558e+06	953780	839134	245745	1.33931e+06	437077							1.54159e+06	1.11855e+06	451666	3.37872e+06	2.16536e+06	439074
O15144	ARPC2	1.42175e+06	3.03697e+06	2.07518e+06	1.38276e+06	1.58176e+06	744646							885952			3.73772e+06	3.29309e+06	339126
P23588	EIF4B	1.38604e+06	1.36555e+06	761248	1.11536e+06	1.38038e+06	523732							1.0738e+06	128044	239068	3.30742e+06	2.11915e+06	322321
Q8NFC6	BOD1L1	1.36167e+06		455049	713243	685243								1269145	1.02753e+06	4.18618e+06	2.54848e+06	898363	16155598
Q15555	MAPRE2	1.33373e+06			1.04465e+06	1.09361e+06								2.12139e+06	1.6574e+06	1.21382e+06	1.82284e+06
P0DMV9	HSPA1B	1.32325e+06	4.65968e+06	1.2091e+06	1.1162e+06	1.60144e+06	596255							4.58825e+06	416162	678244	1.18062e+07	8.18736e+06	1.45217e+06
Q5T8P6	RBM26	1.32056e+06			1.11906e+06	1.29144e+06	510846							1.37994e+06	1.07308e+06			975355
Q9ULV4	CORO1C	1.29196e+06	2.29011e+06	1.16195e+06	1.64556e+06	917121	921439							2.9895e+06	2.53445e+06	2.30668e+06
Q9C0D5	TANC1	1.29146e+06	1.53891e+06	496994	1.18055e+06	1.34859e+06	519662							2.71942e+06	1.91023e+06	1.23672e+06	1.5892e+06	930917	1.02435e+06
O95292	VAPB	1.29105e+06	665057	486383	2.19832e+06	2.15666e+06	766673							4.66232e+06	2.12887e+06	1.82579e+06	2.84537e+06	2.85422e+06	990237
O75909	CCNK	1.2703e+06	887406		2.1747e+06	1.39649e+06								756252	710100	406459		934922	936067
Q9UIG0	BAZ1B	1.26139e+06		3.20363e+06	2.9301e+06		673765							1.67499e+06		1.0174e+06	2.32703e+06
Q9UHD8	SEPTIN9	1.25805e+06	834686	591666	1.3467e+06	1.116e+06	404018							2.14279e+06	1.20237e+06	1.15891e+06	5.1226e+06	1.99715e+06	1.28431e+06
P41227	NAA10	1.25236e+06	4.8988e+06	2.89615e+06	2.00439e+06	1.77195e+06	670059								472684		1.50272e+06	792293
Q9P2E9	RRBP1	1.2483e+06				1.21756e+06								2.44584e+06	718604				1.17921e+06
Q9UQR0	SCML2	1.24307e+06			417900	972784								1.15293e+06	1.03073e+06	271952
Q8TF01	PNISR	1.23706e+06	1.25233e+06	950512	1.02855e+06	1224311	548286							1.17982e+06	1.18484e+06	622554	1.20322e+06	1.14894e+06	566780
Q14157	UBAP2L	1.2361e+06			1.24559e+06	990866	463404							2.17631e+06	97456.6			1.36405e+06	77062.8
Q9P2F8	SIPA1L2	1.23501e+06	2.14878e+06	1.06331e+06	1.52153e+06									2381693	266722	388318	640221	1.20391e+06	2.34398e+06
Q9Y217	MTMR6	1222341				1.36006e+06
Q9NP73	ALG13	1216205			758354									928032	755950
Q9P2N5	RBM27	1.21477e+06				982542
Q13620	CUL4B	1.19679e+06	2.7263e+06	1.81503e+06	261417	974319	198040							1.3098e+06	592996		1.19042e+06	365712	1.26719e+06
P46939	UTRN	1.18427e+06	825052	483763	856217	693090	478952							2.1984e+06	1.72977e+06	1.0639e+06	1.45396e+06	936244	597267
P06753	TPM3	1.17294e+06	848686			978853								536078	693408		7.49383e+06	3.83655e+06	213380
Q96KR1	ZFR	1.12931e+06	1.07251e+06	934603	1.03942e+06	1.15569e+06	234298							1.03469e+06	919933	440661	1.89169e+06	1.28376e+06	424799
Q63HN8	RNF213	1.12153e+06	1.7305e+06	525951	857642	800848	528630									1223966	427540		463269
Q6WCQ1	MPRIP	1.11478e+06												2.86948e+06	820900	292913
Q5HYI8	RABL3	1.08778e+06	3.82316e+06	1161758	1.33536e+06	527970	418619							837759	684154	666241	925939	1.68552e+06	1.97335e+06
Q15020	SART3	1.07369e+06				1.07268e+06								1.06317e+06	724215				55327.7
Q07157	TJP1	1.05728e+06	682161	294567	979677	961940								3.48605e+06	3.68302e+06	876058	980181	953618	576896
P06703	S100A6	1.02722e+06	240634	345403	265293	1.38259e+06	546214							1.93671e+06	4.06156e+06	1.72016e+06	4.79086e+06	4.9324e+06	773582
Q9H501	ESF1	1.02427e+06		550776	995831	1.13694e+06	531103							1.32709e+06	948146	796834	1.05327e+06		594990
O75864	PPP1R37	1.02198e+06	1124048	140797	942711	1.31505e+06	530773								550883		1172544	757390	575755
P06730	EIF4E	1.01953e+06	5.45743e+06	2.42964e+06	1.29311e+06	91734.2	305336							1.11711e+06	260195	405037	242375	1.35547e+06
Q6XZF7	DNMBP	1.01325e+06	612751	704257	783195	709782	536936							2.32386e+06	1.54784e+06	906431	1.75766e+06	1.15657e+06	748890
Q9ULU4	ZMYND8	1.01282e+06	1.15847e+06	816736	1.17144e+06	1.23884e+06	560872							1.23717e+06	1.28401e+06	693926	1.10283e+06	1.32274e+06	668623
O14531	DPYSL4	1.00856e+06	1.03486e+06	657445	1.10449e+06	1.33067e+06	122890							4.49038e+06	2.91285e+06	1.60978e+06			162246
P13797	PLS3	998903	4.96098e+06	2.28834e+06	1.10698e+06	863985	504826							1.09375e+06	323868	128514	1.21396e+06	880725	2.51492e+06
Q14847	LASP1	998511	87692.9	485709		886326	509554							1.93803e+06	1.22014e+06	793655	3.50662e+06	2.41579e+06	541404
Q9C099	LRRCC1	976446
Q15545	TAF7	964239	1.36369e+06	868174	1.32349e+06	1.21015e+06	552840							3.52328e+06	1.64803e+06	1596788	2.85455e+06	1.96995e+06	1.2945e+06
Q96EV2	RBM33	959101			637843	591560	274452							513097	284012		460211		230484
O14964	HGS	946085	6.47818e+06		3.60562e+06		114496							1.39253e+06	281766	465858	2453756	1.87422e+06	5637761
Q01105	SET	935267	513616															1.3846e+06
Q14C86	GAPVD1	924636	1.29334e+06	717023	1.11994e+06	1.52552e+06								1.82121e+06	1.34649e+06	794032
Q15424	SAFB	923848	1.21184e+06	1.03875e+06	1.00833e+06	1.77238e+06	797349							1.69836e+06	441277		4.51755e+06	1.86018e+06	742906
Q8IVD9	NUDCD3	920461	473393		791761	691498
P24534	EEF1B2	914204	1.62514e+06		918408		108669							3.38579e+06	1.50743e+06	1.9924e+06	7.25496e+06	2.75526e+06
A1X283	SH3PXD2B	911339	980833		1.19391e+06	850575								1.5645e+06	1036888	1.28156e+06	747873	663218	684122
Q13428	TCOF1	910243	1.69798e+06	1041695	1.08115e+06	1.57276e+06	487659							2.26223e+06	517032		7.72112e+06	3.92167e+06
Q9Y570	PPME1	909668	722097			1.03763e+06	444376							1.77516e+06	1.5006e+06	745846	1.23944e+06	1.06495e+06	399244
Q9H2P0	ADNP	908274	2.27595e+06	953955			247932							1.12114e+06	527573			1376514	2.52796e+06
Q86UE4	MTDH	901481			156389	122215	53641.6							548064	661274	418703	3.3032e+06	748518	210698
O43795	MYO1B	874509	4.35757e+06		2.19917e+06	421071	85017.6							941376	576452			3.52256e+06	5.0475e+06
P21675	TAF1	866566	739528	748839	824126	1.00042e+06	450020							2.08281e+06	2.216e+06	1.07626e+06	1.8966e+06	2.18124e+06	806716
Q14739	LBR	862124	8.34556e+06		1.77052e+06	1.92442e+06	1.00121e+06							1.74793e+06			2.89653e+06	2.61713e+06
Q01813	PFKP	861782	2.12426e+06	1.08397e+06	693068	589006	415464							1.49213e+06	694594	76316.3	4.23951e+06	3.76457e+06	578293
O15155	BET1	861436		576304	1.68226e+06	1129908								2.20353e+06	1.42911e+06	1.16465e+06	2.15461e+06	1.21115e+06	1.4598e+06
Q9H6Z4	RANBP3	858788	367207		602037	1.83821e+06	340927							868422	693962	445077	898487	320689	298136
P40763	STAT3	856340	757512	383606	765153	895496	376008							3.24965e+06	1.19979e+06	836185	2.63682e+06	1.39254e+06	536829
Q9H1E3	NUCKS1	850792	1.34992e+06	1.6022e+06	1.29629e+06	2.23467e+06	1.01691e+06							1.30627e+06	1.54958e+06	1.12504e+06	4.65798e+06	2.70718e+06	1.58511e+06
P42167	TMPO	842983	1.00933e+06	847734	1.9025e+06	2.08112e+06	3.01867e+06							1.27568e+06	6.86602e+06	5.21511e+06	1.82517e+06	1.50986e+06	229584
P19532	TFE3	842149	597333	373542	712750	879866								3.50083e+06	2.56354e+06	1400954	2.8183e+06	1.95412e+06	1.15625e+06
Q7Z2W4	ZC3HAV1	804620	2.59495e+06	864408	1.85228e+06	654701	529414							1.02415e+06			635274
Q9H3U1	UNC45A	803036	896312	661306	296002	1.12165e+06								287498		404097	300063		62284.7
P22234	PAICS	797908	3.15651e+06			1.28588e+06								1.14272e+06	211609	81936.5	3.68866e+06
Q96NC0	ZMAT2	793302	659076	612018	743126	760100	408940							1.48807e+06	1.3181e+06	780333	1.26044e+06	1.16479e+06	571124
Q99733	NAP1L4	784467	833910	613640	815074	1.11225e+06	399023							350697	554621	2.35232e+06	2.18041e+06	1.79528e+06	635294
Q13596	SNX1	784069			1.28461e+06	2.8147e+06	786558							2.14336e+06	1497294	1373910	1.87689e+06	1.20497e+06
P29353	SHC1	782064	1.08911e+06	529556	1002274	772673	434084							1.67184e+06			1.51609e+06	908667	921231
Q9NYF8	BCLAF1	769607	3.37826e+06	2.20542e+06	3.15585e+06	2.55588e+06	627163							4.66729e+06	2.38466e+06	1.3517e+06	7.66936e+06	5.88611e+06	4.32417e+06
Q92625	ANKS1A	764825	1.11605e+06	744344	668577	906069	461036							1.02152e+06	690218		749241	558352
P53355	DAPK1	759299
Q16674	MIA	742771			860856	641898	402902							1.38829e+06		950017			700856
Q9UKX3	MYH13	732880	424481				279961							8547778
Q9P0L0	VAPA	728287	599374	232598	181009	908988	316994							5.46383e+06	2.21637e+06	1.22773e+06	6.5229e+06	5.3767e+06	1.57496e+06
O43395	PRPF3	726074			589402	2.67953e+06	1.56175e+06							3.37607e+06	493731	1.09778e+06	674133	1.67493e+06	2.30536e+06
Q9P2D1	CHD7	723655												916001	538762	186015	697050		113957
Q5SW79	CEP170	723075	264212	295251	1.24588e+06	171107	628356							1.89061e+06	1.51072e+06	550996	721964	413565	559678
Q7Z417	NUFIP2	722344	803885	609933	683867	655016	167970							178485	467557	183870		186752	157645
Q9BXF6	RAB11FIP5	719126	2.13856e+06	1.08363e+06	1.78214e+06	1.18801e+06	205891							876264	1.32576e+06	578543	465603	643767	1.19317e+06
Q8NFD5	ARID1B	699501			706926	712246	364071
O75683	SURF6	688991	771079	724384	879057	669411	345345
Q14978	NOLC1	685262	1.12381e+06			881285
Q9UKK9	NUDT5	680856	767222		961235	1.23404e+06								1.05446e+06	727499		1.23651e+06
Q99439	CNN2	678530				787131	71828.2							197624	586281	240434
Q8WWI1	LMO7	671383	5.17793e+06			835242								1.0643e+06	1.04837e+06	139652
P18615	NELFE	669584				661129									425608	428005			283321
O95817	BAG3	664908	238256	102198	750415	1.05301e+06	441660							2.14033e+06	1.34892e+06	989204	1.44225e+06	691016	510585
Q9BRZ2	TRIM56	660712			210995									837632		1.00921e+06		1.94197e+06
Q96Q89	KIF20B	657522				609287	142329							3.2975e+06	1.98203e+06	1.67219e+06	1.67855e+06	2.60763e+06	809592
Q8WXF1	PSPC1	656524	963607	710771	1.01353e+06	1.07796e+06	464212							216963	154765	760592	837593		555756
O94888	UBXN7	645327
Q9UKV3	ACIN1	636316	1.46047e+06	438781	657498	534583	192916							516321	1.15115e+06	565240	1.79635e+06	1133590	1.46975e+06
P28347	TEAD1	630474	182522		448446	281148								803389	896243	338054	515539		913549
Q8N511	VMA12	612438	587652	428621	696903	693907	302552							2.67117e+06	1.80382e+06	945865		1.58394e+06	685287
Q8WXI9	GATAD2B	609966	630799		465513	786660								793298	546938	423448	530255	643063
Q9NR12	PDLIM7	598613		944229	1.15835e+06	470654	192039							1.35328e+06	596417	508965	1.73151e+06	711722
P05783	KRT18	597913			203047	275263									293613	145804	381664	699790	177115
Q9UMN6	KMT2B	594892													626279	413124
Q16204	CCDC6	593053	642834	512525	664762	644679	358861									312661
O43290	SART1	572446	563418		701374	585219								54083.5		430284		174187
P11171	EPB41	566347		482598	608680	667411	527854							1.60082e+06	1.42031e+06			1.2718e+06	211519
Q9UJX2	CDC23	565686				827118	202225							648365
Q15652	JMJD1C	561942			317948	446627	175299							733482	1.02715e+06	498481	607062
Q9Y520	PRRC2C	559060	679270	365475	271227	212551								1.02672e+06	1.71248e+06	448226	986374	1.09265e+06	388931
Q6PKG0	LARP1	550317	736180	473157	311621	1.30266e+06	199351							1.62132e+06	815309	233756	1.4959e+06	660870	1.20232e+06
Q8WUQ7	CACTIN	542984	443899	266291	484035	490598	234418							829429	1.09287e+06	333854	731907	1.41078e+06	999618
Q8NBF2	NHLRC2	540421	692628		590181	549007								1.10636e+06	1.01933e+06		1.77772e+06	659744	527514
Q9NYM9	BET1L	533557			399098	720339	249427							806587	601544	393508	561598	579465
Q96EB1	ELP4	523469				963641									533699
Q8IWR0	ZC3H7A	508297	436077	407784	391486	580633	270128							796481	642040	400397		630200	302468
Q9UPN3	MACF1	507136												1.89774e+06	1.97938e+06	1.19919e+06	1.35388e+06	818862	713273
Q15459	SF3A1	503105	3.46301e+06	396623	243102	752786	165770							2.02858e+06	1.20437e+06	876388	4.56453e+06	3.60598e+06	3.27974e+06
P35658	NUP214	492655			426524	655497								1488993	1.17657e+06	234861	1.4442e+06	1.06482e+06	1.18088e+06
Q9H2U1	DHX36	490398			1.35731e+06	942330								521248	327837	420872		760401	1.66816e+06
Q9UJU6	DBNL	486870	672984		832291	1.76781e+06	698103							2.86479e+06	2.85471e+06	2.0729e+06	1.58192e+06	917054	343809
Q7Z2K8	GPRIN1	486465				315580	86024								268064		380856
Q96QC0	PPP1R10	481796				1.05952e+06	570525							2.52101e+06	906098	1.25796e+06	2.36062e+06	1184634	410773
Q92575	UBXN4	479330	545586	395699	528708		258338								552115
Q9NRY4	ARHGAP35	476516	1.29865e+06	240574	601225	661308								181171		197973
Q99961	SH3GL1	471375	364949	760512		880477	437296							997809	558749	290968	961141	1.02037e+06
Q96AT1	KIAA1143	468351				446447								1.08671e+06
O15498	YKT6	465583												187097	485515		1.66175e+06	830460
Q9UKY7	CDV3	458587	213808	107273		392868								1.68452e+06	1.69123e+06	786959	1.74303e+06	955587
O14976	GAK	456529	330406	384479	626786	374849	351882							458017	465677	105230
Q9Y5V3	MAGED1	455330	493592		516264		265076							395087	303874	213348			181102
Q13823	GNL2	453130	3.57283e+06			1.29134e+06											508051		4.92739e+06
Q9ULW0	TPX2	452954	791590	868039	1.29912e+06	1.09111e+06	338520							1.4128e+06		706021		957313
Q5HYK7	SH3D19	452028				402880	337051							936838	741996	678966	915858
P48634	PRRC2A	446996	616669	376872	428947	844107	338108							929821	707253	465374	1.05677e+06	374292	210269
Q9NW82	WDR70	443877				534930	248909										548716
O95210	STBD1	442630	844906	446238	889506	831767	254353							570890	380747	318455	420980	436202	267148
Q5T5Y3	CAMSAP1	438814	462406	331377	483452	682772	184315							951103
P51397	DAP	429376	370703	198288	392346	406572	200584							1.76171e+06	390900	1.09468e+06	680210	598645	138990
Q96D71	REPS1	427993	333943	222582	363537		182304							544140	438788	322712	476654	267330	293898
Q9H425	C1orf198	420957	507585	398536		472448	267933							379299	256757	186960	292120	206112
P78559	MAP1A	417696				258736	372836							2.49175e+06	2.16309e+06	1.10076e+06	1.34606e+06	382145	479686
Q2M2I8	AAK1	414010	757380	743478	475761	830309	679325							1.8478e+06	1.29988e+06	919103	1.40597e+06	743903	316242
Q5VWQ0	RSBN1	411836
Q9H8U3	ZFAND3	400919		413582		479045
Q9HB21	PLEKHA1	400453	505612	303101		493331	219098							887479	570399		558875	657587	396672
P86790	CCZ1B	400386				437705	215537							1.21789e+06	636902	510631	919951	530014	319229
P23497	SP100	397964	444569	419597	485050		284240								503205	258175			763309
Q8WW12	PCNP	395509	1.53978e+06	789366	1.73586e+06	1.48637e+06	505371							2.36325e+06	696413	1.02453e+06	1.48753e+06	842485	770893
P21291	CSRP1	392149	664182		302240	139113	521145							2.104e+06	611043	1.06261e+06	2.72246e+06	2.49193e+06	532538
Q9H2G2	SLK	385054				363799									399584
Q9H8H0	NOL11	385024	8.22364e+06	2.41613e+06	2.49253e+06	1.05787e+06	727615							1891235	353073	1.02166e+06	1.6072e+06	2.20293e+06	6.20178e+06
Q96PZ0	PUS7	377863	2.75238e+06	923103	918083	286625								506442	536290	289467	391112	457045	1.45274e+06
Q9Y6I3	EPN1	366710
Q9Y618	NCOR2	362267				264828	757980							417990		181769
P35998	PSMC2	357901												282987			3.35019e+06
Q99700	ATXN2	354132	295868	216095	333428	475700	137120							711478					249256
O15014	ZNF609	353190	446858	330670	414333	615882	211564
P35789	ZNF93	352630			321534	293402								363342	320777	154212		412117
Q14126	DSG2	346892				291674								1.97184e+06	2.20933e+06	2.23711e+06	1.57571e+06	1.76302e+06	531912
Q86WB0	ZC3HC1	345176	4.96515e+06	2.48479e+06	1.42522e+06	1.77221e+06	498549							1.27325e+06	772267
Q9H0E3	SAP130	343253				288078	130771							675831	587432	379650	428226	301674	244925
O75886	STAM2	342347				465808
Q5VZ89	DENND4C	341500				368234										146929
Q93052	LPP	328698				314571	190418
Q9Y4E8	USP15	323000	2.03047e+06		865913	316920									188657		317271		892516
Q9NWH9	SLTM	320694	222732			313239	169207							319361	384560	208056			63660.5
O95219	SNX4	316291				358479								1.30437e+06	1.17353e+06	644562	1111603		481198
P61081	UBE2M	316143	701348	173862		469341	230456							524373	438880	211176	1.2034e+06
P13489	RNH1	311782
Q13206	DDX10	305982												662735		379467
Q9NWB6	ARGLU1	304558		230301	381632	127368	155211							163557			636758
O43314	PPIP5K2	296430			305507	510195	244542								278318	291423
O75381	PEX14	294584			394758	415672	194079
Q9C0B5	ZDHHC5	293163													323912
P11717	IGF2R	292270												785367	502626	602000	738731	863103	1.21757e+06
Q9BZF1	OSBPL8	283194	3.01614e+06		297308	723059	142979							1.81424e+06	1.00187e+06	511249	1.42809e+06	1.57613e+06	4.13875e+06
Q9NZZ3	CHMP5	283029	243556	286449	290162	545789	424310							2.79573e+06	1.78956e+06	404871	1.27886e+06	628176	765144
Q15042	RAB3GAP1	277470				293964	139621							1.3418e+06	316492	235940
Q9Y2D5	PALM2AKAP2	273498	536681	746891	756875	965005	499972							7.51297e+06	4.98359e+06	3.57746e+06	7.02685e+06	3.91557e+06	3.37505e+06
Q00688	FKBP3	266296	201760											377849		198876	308423		74556.2
Q8NI27	THOC2	266194	781187	675276	185780	271566	81761.4									531672		1.1022e+06	1.19761e+06
Q8N8S7	ENAH	266098	478373		285763									368465		155449	762700		126520
P46821	MAP1B	246309				281136								1.81867e+06	1.48102e+06	1.12523e+06	1.05091e+06	408928	40784.3
Q92890	UFD1	237819												556412	388533	285314	493176		226143
Q9H987	SYNPO2L	235008		236141	264647	414547	141972							443909	349765		368897
Q9H814	PHAX	234502												371528
P43487	RANBP1	231306				184797								271649	170531			617075
O75787	ATP6AP2	230513	593930	245425	295760	277469	130909							198611					91067.1
Q9Y2H0	DLGAP4	225679	197913	168545		163398	105829							525593	513567		338435	294570
P06396	GSN	225320	542670			921839								716860		149979	361863
O94986	CEP152	224630		180273		200888	106265							239083	192094	123966			113132
Q8NDI1	EHBP1	223314			251064	266310	151015							467557	393981	229153
P16591	FER	222259				336821	133082								334362	168403	406933	272603
Q9UNZ2	NSFL1C	216740		135347	158712										177725	113795
P46060	RANGAP1	211554	899246	163350	1.18042e+06	1.38522e+06	528603							3.46659e+06	1.96128e+06	1.47782e+06	5.0996e+06	1.67713e+06	1.01595e+06
O43432	EIF4G3	209142	336891		235138	805316	319072							651113	564511	189366			136309
Q96CT7	CCDC124	208135	273120	207792	255976	229771	150628							736013	421514	257494	771544	590704	228599
A8MTY0	ZNF724	205018
Q8IYD1	GSPT2	201006	1.10561e+06		173003	221876	139566							5.42784e+06	191272	2.1172e+06	5.04657e+06	569046	109687
Q96C92	ENTR1	199428
Q14669	TRIP12	198861												487532
Q96ST2	IWS1	197998												524470	314324	198776	459618	308460
Q13129	RLF	195878	206994	179485	229567	243801	105283							266837	202516
Q9Y2S6	TMA7	191904	272053	191182	285335	261323	211364							347938	298009	240908		201725	155322
Q9ULE4	FAM184B	187092		184975	245716
Q9NS87	KIF15	184588												290806		168481
Q9BPX3	NCAPG	183705	2.73081e+06	791899	374500									177269		415995	633057		3.48698e+06
Q6NYC8	PPP1R18	183645		117984	173015	172696	78312.5							434826	255595		607163	247408	178342
P24928	POLR2A	175915														657627
Q8TBX8	PIP4K2C	175878	957894	972718	213403	235173	550895							1.97492e+06	1.3846e+06	1.57593e+06	941185	958261	996261
Q96A33	CCDC47	174421			1.71191e+06	719448											2.2414e+06		637353
O76094	SRP72	169416												579843	541370	448525	771613	701344	324011
Q9BWH6	RPAP1	166884				120309	82867.4							128230
P20962	PTMS	160694					144104							343880
Q96T51	RUFY1	160692	1.70059e+06	539164	611249		459152							2.11194e+06		738845	871270	503282	359672
Q15050	RRS1	159263			139043	325805	91368.7							132930
Q96I25	RBM17	156683	144812			493798	64020								117093	108289
Q6IN85	PPP4R3A	155807	191070		187251		78182.4
Q3MHD2	LSM12	151703				158112								216526	191433			139122
Q2TAL8	QRICH1	142453
Q9UQ35	SRRM2	115794			1.78702e+06	1.29394e+06								271884		491030
Q00341	HDLBP	113472	553797
Q06546	GABPA	104264	133039		142377														82376.5
Q8IVM0	CCDC50	80348.4				83946.9	55134.2							91997.6	66730.8
O95218	ZRANB2	74322	472535	502141	489168	1.04337e+06	662953							662970	1.69496e+06	944586	1.74079e+06	944834	375292
Q13813	SPTAN1	72976				186642								221579	277650		9.80434e+06	3.73005e+06	820121
P50402	EMD	21166.2	1.3282e+06		745933	262049								1.77396e+06	596372	330301	2.90792e+06	2.07608e+06	742042
Q08379	GOLGA2
Q8IWZ8	SUGP1		792307	983543		836534	427004								1.32231e+06	816837	1335236	1.05478e+06	944825
Q6VMQ6	ATF7IP													502465	308970	213832	350993	330818	187995
Q8IUD2	ERC1													3.08521e+06	2.68709e+06	1.67822e+06	2.37518e+06	1.09929e+06	1.02081e+06
P51003	PAPOLA
Q13177	PAK2		1.16201e+06	840097	436409	1.33406e+06	414521							614099		375412	167462
P49750	YLPM1		326227	165460		233281	127694										82768.8
Q9GZT9	EGLN1			113096										215363	157190
Q5GLZ8	HERC4		1.42306e+06	652751	718604	311966								790132		168934	610221	691200
Q9Y2H2	INPP5F													1.99061e+06	1.36068e+06	924587	1.67935e+06	1.03093e+06	705637
Q9BSJ8	ESYT1			375952										513876		76404.4	1.1485e+06		1.22182e+06
O75937	DNAJC8		94973.4											802255	164452
Q9UMZ2	SYNRG
P35442	THBS2		199146
O15541	RNF113A
Q6ZUT1	NKAPD1					299918								405900	442371	245704
Q13330	MTA1		658869	505780	667546	687200	323393								315799	237630
Q658Y4	FAM91A1					570893									551936		573818
Q9H098	FAM107B					264230								750485	1.06705e+06	221341	757568		165657
A6NP11	ZNF716
Q9P270	SLAIN2													1.28523e+06	694244	362071	947939	609347	267209
Q2YD98	UVSSA		245138	185538	247495									641240
Q53ET0	CRTC2			143019	139924
Q9NRA8	EIF4ENIF1													488617
Q96NB3	ZNF830		314235				154400
Q15003	NCAPH		365245		395295		211233								427030	191076	848936	459334	136375
O15042	U2SURP		1.98041e+06		716215	429082	518353							921859	290950	543712	2.71555e+06	175038	167807
P41223	BUD31						109236									153852			110203
P49959	MRE11					321760
Q8ND56	LSM14A		83069.2			130324								259016	104465
O95819	MAP4K4					482363								136750	323868
P27540	ARNT													251290
Q9ULM3	YEATS2
P42226	STAT6		180279	90622.5		234752									145687				86329.3
P18583	SON					102549	253375							810532	628261		483554	1.06407e+06	871275
Q05209	PTPN12		300678		283151	186315	185066							1.18516e+06	794473	319510			250587
Q96RE7	NACC1				495616	430547
Q13561	DCTN2																256504	229921
Q9ULH1	ASAP1
Q9NWV4	CZIB
Q9UPT8	ZC3H4		631595	317173												393993	735239	604523	366346
O96013	PAK4													454976	185544
P17275	JUNB														502172
P18031	PTPN1		236125	151338	266939	168501	86404.1								513018	346730	1.71555e+06	1.22795e+06	2.0995e+06
Q12888	TP53BP1														531496
Q9UBB9	TFIP11				155803									227307
Q15648	MED1					365633										210685
P33240	CSTF2					1.14058e+06								803865	1.24333e+06	1.04622e+06	2.1031e+06	2.26943e+06	995072
Q86VM9	ZC3H18		1.46982e+06	472393	1.40568e+06	1.95441e+06	429657							931432	116567	372726	1.18638e+06	601921	477680
P53367	ARFIP1				1.19116e+06	862128	131712							735018	564006	294134
O43719	HTATSF1					147604									174564
Q8N3D4	EHBP1L1		1.96938e+06	262612										210533	368199		384269
P55196	AFDN		1.56291e+06			1.96619e+06	955206							1.98185e+06	1.57738e+06	1.5749e+06	1.60817e+06	1136929
Q96T23	RSF1			249869	286131	254665								261682
Q92576	PHF3
Q8IX01	SUGP2														544351
Q96T58	SPEN		209461												766620	289633
Q9Y6G9	DYNC1LI1					709067
Q14241	ELOA						107958							211255
O00560	SDCBP		729666		654682	330382								1.34187e+06	397606		274217		885697
P29084	GTF2E2																455063
Q8TCU4	ALMS1													913794	511148		444869
Q13796	SHROOM2
P49756	RBM25					777158										498784	813354
O14683	TP53I11					171161	90031.2
Q07820	MCL1
Q9UN66	PCDHB8
Q96BY7	ATG2B
P52594	AGFG1					400721									450590	315907	536335
Q9HAP2	MLXIP
O75061	DNAJC6														216355
Q9NQW6	ANLN		237600	347514	193625	256943								395203	286546	173962	1.13981e+06		2.08568e+06
Q2M1Z3	ARHGAP31
Q9H074	PAIP1														265439
P30622	CLIP1													560142	222714	150830	336039
Q9H910	JPT2		222868	263561	740278	464591	279149							1.90144e+06	1.20943e+06		576895	387217	229508
O60341	KDM1A															79288.2
P48382	RFX5
Q9C0C9	UBE2O					780642								3.37153e+06	1.2891e+06	2.36217e+06	1.88117e+06	197731
O95070	YIF1A		2.26707e+06		105550														1.49595e+06
Q8TBA6	GOLGA5
Q6IBS0	TWF2					965615								914678
O95721	SNAP29															76174.8
Q9C0C2	TNKS1BP1													243833	641655	59221.8
Q9UQN3	CHMP2B				234326									679234
Q7Z5L2	R3HCC1L
Q15154	PCM1
Q9Y2W2	WBP11					138808								192725		236470	1.30942e+06	785467	423400
Q8ND82	ZNF280C		735224	525896	672334	679267									145146			542337
Q86U42	PABPN1			207405													1.23124e+06	502298
Q14596	NBR1					178233									320741	236769	427982	338121
Q92572	AP3S1					43529.9
Q14687	GSE1			224450	326077		128191
Q147X3	NAA30			127396	184798
Q9Y421	FAM32A																	126034
Q15061	WDR43					3.14383e+06
Q15287	RNPS1		97810.6			51535	35633.2
Q96JM3	CHAMP1															298659	201225
P51798	CLCN7		792188		704509									384967
Q9Y4E5	ZNF451					327396								443202	339289	320787
Q5QJE6	DNTTIP2														110482			119128
Q9UKX7	NUP50		230317	146240		985049								1.33335e+06	1.18175e+06		991483	1.51731e+06
Q8N7H5	PAF1					174642	82221.7							150624
Q6P2C8	MED27
Q8WUZ0	BCL7C
O75663	TIPRL		211800
Q71DI3	H3C13, H3C14, H3C15					5.60085e+07	2.69323e+07									3.05918e+07			5.49062e+07
Q5VUA4	ZNF318		187297			1.36011e+06								265971	279194	125978			98194.2
Q8WX93	PALLD			372204		441988
Q9UGU5	HMGXB4		67385.2												145288
Q5SSJ5	HP1BP3		112282		1.02769e+06									2.98515e+06	2.08638e+06	3.85139e+06	3.21661e+06	2.86644e+06
Q7Z6E9	RBBP6					184818
Q92598	HSPH1		772893	648081	309383		154002							754239			2.19549e+06	1.22253e+06
Q9ULD2	MTUS1		437392	401548	503324	535602								674676	549463		545543	412784
P06400	RB1		906821											1.29186e+06			1.08182e+06
P35869	AHR													283851	774977	358846	421876
A6NLU0	RFPL4A					307099								651753	499607		550079	415484
O60749	SNX2		527223	336442	233280											61458.3
P50747	HLCS					472229	292494							917924		537379		399157
P20810	CAST		231821	160089	260508	211007	125990							401257	216349	187535	373599		172032
Q14966	ZNF638						61144.3								70882
Q96A57	TMEM230
Q6Y7W6	GIGYF2		113547			83434.2									176792
P50454	SERPINH1		7.9232e+08
P58876	H2BC5		2.13346e+08	1.43301e+08										3.54704e+08	1.1215e+07	3.94638e+06		7.0933e+08	2.55185e+08
P23528	CFL1		1.92787e+08	9.49794e+07	7.48038e+07	5.54995e+07								7.40342e+07	3.88706e+07		1.08463e+08		1.49194e+08
P06733	ENO1		1.20358e+08												4.38747e+07
P22626	HNRNPA2B1		1.18253e+08
P68431	H3C1, H3C2, H3C3, H3C4, H3C6, H3C7, H3C8, H3C10, H3C11, H3C12		1.15955e+08	4.03366e+07	5.5608e+07									131639662
P07910	HNRNPC		6.29452e+07	3.33041e+07											1.67341e+07
O00232	PSMD12		2.88113e+07		1.18995e+07	7.42625e+06	2.30137e+06							8.10644e+06	3.22939e+06	956670	8.10787e+06	9.69184e+06	9.11399e+06
Q15366	PCBP2		2.66733e+07	1.58949e+07	1.47696e+07	1.4034e+07	8.1087e+06							1.43693e+07	8.18279e+06			2.18158e+07
P62316	SNRPD2		2.45525e+07	1.38497e+07		7.4088e+06	3.38145e+06							1.1005e+07	3.80829e+06	3.27222e+06	1.96936e+07	1.09935e+07	1.54625e+07
P55265	ADAR		2.04868e+07		7.48908e+06	4.14895e+06
P36578	RPL4		1.94094e+07	1.22757e+07		8.92615e+06
P18669	PGAM1		1.39829e+07	6.38736e+06	9.74059e+06		2.42983e+06							3.10003e+06	2.25168e+06	2.39911e+06	1.32829e+07	1.12365e+07	5.4258e+06
P52948	NUP98		1.07823e+07		2634139	2.25442e+06	970161							2.01208e+06		1.21647e+06	2.09548e+06	3.31372e+06
Q16719	KYNU		9.0816e+06		9.24095e+06		660954							934638	1.30679e+06		3.55899e+06		7.55499e+06
Q04760	GLO1		8.21642e+06											1.95925e+06				2.28542e+06
Q13492	PICALM		6.7258e+06
P05455	SSB		6.59116e+06		3.37305e+06
Q7Z2W9	MRPL21		6.50061e+06						6.85781e+06
Q9Y6E2	BZW2		5.18415e+06		1.50141e+06									1.79973e+06			706446		3.58725e+06
Q13148	TARDBP		4980039		1.94295e+06									1.4737e+06	782041				5.83683e+06
Q8N3C0	ASCC3		4.56372e+06		378689
P35241	RDX		4.43487e+06		1.98714e+06	1.52776e+06	1.03094e+06							1.24936e+06		554137	606517	1.06958e+06	2620503
O14617	AP3D1		4.01427e+06	1.26236e+06	1.60222e+06
P60468	SEC61B		4.00632e+06	2.15141e+06	472485	684947	327930							2144820	871040	172041	3.37475e+06	1.96592e+06	3.43226e+06
P28370	SMARCA1		3.14874e+06			495492									361917	259607			3.74852e+06
Q9UQ80	PA2G4		2.62899e+06			1.70978e+06								2.55745e+06	1.11797e+06		8.0722e+06
P04083	ANXA1		2.25545e+06			2534861								4.59247e+06	2.49833e+06	1.5418e+06	1.4242e+07	1.10293e+07	2.53839e+06
Q9Y2L1	DIS3		2.1839e+06		271626	183053
O14715	RGPD8		2.07246e+06		347938														1235651
Q8IY81	FTSJ3		2.05577e+06				49930.3
Q96L91	EP400		2.0212e+06
Q12789	GTF3C1		1.99806e+06
Q9BR76	CORO1B		1883464	1.16017e+06	1.29376e+06
Q05086	UBE3A		1.78044e+06															417969	139326
P46087	NOP2		1.55486e+06
Q16643	DBN1		1.53378e+06		823240	674507	216213							1.3925e+06	376491	552122	7.03258e+06	3.47494e+06	277169
Q96A65	EXOC4		1.47129e+06		240499	134329										156739
Q8N257	H2BC26		1.46755e+06	928493			281772							1.71342e+06	804761				1.01925e+06
Q9Y613	FHOD1		1.39398e+06	432160	429807	409350								310736					990193
Q6PD62	CTR9		1.38365e+06
O95159	ZFPL1		1.32501e+06		638622	164777	90439.3
Q9NVD7	PARVA		1.2789e+06											1.01825e+06	293856		473322		292137
Q96SB4	SRPK1		1.19376e+06	62094.1			108501							306214
Q86X10	RALGAPB		1.09414e+06
Q15080	NCF4		1.05666e+06
Q9NTJ3	SMC4		1.02517e+06	166230		177504	90323.9							1.4449e+06	715443	684550	2.31305e+06	797538	1.00365e+06
P53999	SUB1		829972	236873	535071	747147	471019							2.35031e+06	1.05637e+06	1.26629e+06	9.02506e+06	7.45156e+06
P51617	IRAK1		787076											459329
Q92888	ARHGEF1		713243
Q6UN15	FIP1L1		698699			668134	309483							374045	293063	168810	98967.9	349074
Q9NRL2	BAZ1A		689437
O00559	EBAG9		681030	579891		642650	139286
Q9NZN5	ARHGEF12		645361			177477
Q1KMD3	HNRNPUL2		625227	378902	334158	618092	151762							643641	407809	274930		1.39899e+06	455706
Q9BVC6	TMEM109		562174	366926		609090	173602								554520
Q9NP61	ARFGAP3		562023
Q9Y3B7	MRPL11		526083
O14497	ARID1A		451746			446473													126448
P47914	RPL29		423186
Q9Y426	C2CD2		400326		335714	221049	155999								250387	139262			538082
O75962	TRIO		377797		976072		190641							441499	374487		407252
Q9BUJ2	HNRNPUL1		322158		574727	220493								750287	423672	280281	1.83682e+06	1.89681e+06	823270
O14562	UBFD1		317868													282042
Q96S94	CCNL2		287519											443843			282576
O60814	H2BC12		278234		1.40134e+08														890934
Q9Y5L3	ENTPD2		264626			247504
Q86V48	LUZP1		260539	278005	376701	335844	172171							424011	1.56273e+06		647421	355349	233751
Q9NQ86	TRIM36		259000		151292
P41219	PRPH		239154
Q14151	SAFB2		228591			86815.4	88231.4							143412				2.38061e+06
Q86UP2	KTN1		226486												53555.4		1.53842e+06
Q9NW97	TMEM51		220498		168785	233775	111422
Q15121	PEA15		193540
O00499	BIN1		185283				143613
Q8N2M8	CLASRP		171916	144848	201660	199931								238763	148097	161440	222836		135003
Q6UUV9	CRTC1		162334				83455.2							150620
Q9BWT3	PAPOLG		160032
O15145	ARPC3		157901											488645	98042.3
Q9H444	CHMP4B		151199											270525	205530	117986	909746
Q9NWX6	THG1L		145284
Q969S3	ZNF622		137199		140793		83998.8
P35611	ADD1		130626
Q8IYB3	SRRM1		122967
P57723	PCBP4		108515
Q9UQB8	BAIAP2		101209
O14737	PDCD5		89621.4											69120.5		102449	479280
Q9UEE9	CFDP1		83286		747024
Q8NCU8	MTLN		67523.7
O95816	BAG2		59063.5	77846.9		306287									268124
Q96B97	SH3KBP1		58128.7
O00471	EXOC5
Q7Z589	EMSY													258363	188039	95527.6
O43293	DAPK3
O95983	MBD3
Q9H9P8	L2HGDH
Q9UPP1	PHF8
Q96NG3	ODAD4
Q9UL40	ZNF346
O60282	KIF5C
Q8N715	CCDC185
Q9Y385	UBE2J1
Q96F24	NRBF2					92923.6
O75970	MPDZ													451576
Q8IVT5	KSR1
Q8WU90	ZC3H15				131736									402651		125496	235994
Q8NBN3	TMEM87A													769370		405952
Q9UJ98	STAG3
Q4L180	FILIP1L					148556											217316
Q9ULH7	MRTFB														104026
P62736	ACTA2
Q8WXE1	ATRIP				53023.9
Q5CZC0	FSIP2
Q9UH65	SWAP70													1657452
Q9UHY7	ENOPH1										278704
Q9UK76	JPT1													439569	712027	153448	1.73553e+06	846860	105453
Q14738	PPP2R5D					142363
Q15032	R3HDM1						80410.1
O60934	NBN
O94916	NFAT5
Q9Y3B9	RRP15													451920			344266
Q15386	UBE3C
Q7Z2T5	TRMT1L					137649	55432.3
Q7KZI7	MARK2
O95873	C6orf47						32992
Q16526	CRY1													215347
Q9NX58	LYAR
Q14320	FAM50A
Q05397	PTK2
Q9UPQ9	TNRC6B
P51858	HDGF			5.89735e+07		3.6056e+07								4.24772e+07	1.69479e+07		3.77583e+07	4.35562e+07
Q8IUE6	H2AC21			4868599				5.07768e+06	4845375						4943866	4.36976e+06	145569	14410251	4780314
P60842	EIF4A1			3.48803e+06	4.7955e+06	6.19857e+06	2.05473e+06							8669354	4.00623e+06	3.30129e+06	2.65656e+07		6.46698e+06
Q96A72	MAGOHB			2.55213e+06												1.72121e+06
Q05519	SRSF11			1972893		2.89551e+06	1.61841e+06								2546963		1.12305e+06		1.95045e+06
Q9UPU5	USP24			1.29564e+06
Q92797	SYMPK			992889	1.0458e+06										164206	77305.8
Q8IWC1	MAP7D3			451497												749171
Q7Z434	MAVS			440074	298317	45655.3									279899		167146
A0FGR8	ESYT2			427993			62295.8							218112	338232	578578	517783	394410
P33778	H2BC3			406223											116420			78988.7
Q2KHR3	QSER1			238843										400864
O94953	KDM4B			209288										185970
O43768	ENSA			194165		612441								1.39975e+06	1.30357e+06		1.69576e+06	691185	217518
O75578	ITGA10			173635
P10398	ARAF			172945										403090
Q8IWU5	SULF2			171683
Q92922	SMARCC1			168354
Q9H6S0	YTHDC2			164953		345278	222395							1.0403e+06	625066	416874		478180	270597
Q13393	PLD1			145914			74733.7
Q14160	SCRIB			142756
P0DME0	SETSIP			121701		2.12497e+06								978110
Q7Z5K2	WAPL			112630
Q8IWJ2	GCC2														127088			133146
Q15208	STK38
Q53GG5	PDLIM3
Q13951	CBFB
Q86W56	PARG
O14828	SCAMP3					202720							3189064	418847	83673.9				284656
Q562R1	ACTBL2
Q96JP0	FEM1C
P48454	PPP3CC
P23381	WARS1														115566		247563
P35269	GTF2F1													285275	180798	193176	371036	577048
P29401	TKT				2.67763e+07
P08195	SLC3A2				1.21813e+07	7.40167e+06
P16070	CD44				8.62556e+06	7.15727e+06
P30566	ADSL				1.28587e+06	908805								1.07267e+06		543632
O60231	DHX16				1.28062e+06										529167
O60716	CTNND1				1.27988e+06	1.26418e+06	141541							1.4709e+06	787664		1.20462e+06	2.24346e+06
Q6UB35	MTHFD1L				1.02814e+06
Q8WZ42	TTN				681550	912380
Q9NVM6	DNAJC17				669580									1.09362e+06
Q9NVU7	SDAD1				650483
P27348	YWHAQ				496360	842188											3.27514e+06	3.07998e+06
P33176	KIF5B				459407									1.15247e+06	335821		1.16504e+06
P26640	VARS1				401214	698770	128371									74204.5
Q96L73	NSD1				361098
Q9UKM9	RALY				354761		680254
P35637	FUS				316894		171002							2.33794e+06	403568	220461		8.21277e+06
P78314	SH3BP2				278012		138432
Q15691	MAPRE1				136687									60842.9			855804
Q16799	RTN1				125400									682152
Q9Y2K1	ZBTB1				49340.9
O75915	ARL6IP5
P39748	FEN1						156426							992513	105161	310469	4.57242e+06
Q8NG31	KNL1						101521							1.29968e+06	525344	431490	955776	704032
Q8N0X7	SPART								2413498					1.82301e+06	327851	258151	1.65656e+06	285695
P42574	CASP3
O15553	MEFV
Q03111	MLLT1
Q16513	PKN2
Q5D862	FLG2
Q9NT62	ATG3					124103								215334		100030
Q99590	SCAF11														150138
P63267	ACTG2
Q9HCE3	ZNF532
Q9HCH5	SYTL2					86247.3
P60608	ERVFC1-1
Q8N3V7	SYNPO
O95625	ZBTB11
Q9Y5U2	TSSC4
Q5HY98	ZNF766
P46013	MKI67													84449.8			76203.1	646523
Q15843	NEDD8					36749779								3.28705e+07		19789971	3.53881e+07
P11021	HSPA5					2.64183e+07
O75531	BANF1					1.7228e+07
P62826	RAN					1.28964e+07								1.64667e+07	9.98577e+06		2.46017e+07
Q9BY44	EIF2A					9.62001e+06									4.27852e+06
Q13200	PSMD2					8.50201e+06	1.65777e+06							8.74586e+06	1.93522e+06	2.81673e+06	1.01859e+07
P40227	CCT6A					8.0279e+06								7.33482e+06
P14866	HNRNPL					5.28517e+06								7.43675e+06
P09874	PARP1					4.8363e+06
P26599	PTBP1					3.85595e+06											8.35837e+07
P62140	PPP1CB					3.03518e+06								2.86228e+06		1.1612e+06			1.04112e+07
P53396	ACLY					2.44716e+06
Q9H2M9	RAB3GAP2					1.75542e+06										369128
P31939	ATIC					1.7009e+06	797698							1.22862e+06	485672	60507.8	1.31919e+06	1.74599e+06
Q9HAV4	XPO5					1.58493e+06
Q7L523	RRAGA					1.44097e+06
O00571	DDX3X					1.25272e+06								1.94946e+06	283669
Q14694	USP10					1.22622e+06									259358
Q13283	G3BP1					1.05795e+06									1.94189e+06	1.60253e+06	7.69563e+06	5.09076e+06
P09496	CLTA					954722								926887	872628	541251	4.17707e+06	4.1003e+06
Q8IWX8	CHERP					923073										798772
Q9Y3F4	STRAP					543788										491157
Q8N6T3	ARFGAP1					478998								349350	1.2987e+06			1.17146e+06
Q13155	AIMP2					475209								460259	382282
O43242	PSMD3					461238
Q9UPT9	USP22					364925													1.42877e+06
Q6P1N0	CC2D1A					300414
O94913	PCF11					238914	120084								166270
Q96JB1	DNAH8					235023
Q6PJT7	ZC3H14					187492
Q9NUQ3	TXLNG					122813
Q9H089	LSG1					109651
Q9UK61	TASOR					104155									139673
P21127	CDK11B					102141
Q15464	SHB					91929								109969
P10746	UROS					80410.5
O14974	PPP1R12A					77009.4								100904
O15061	SYNM													700719	407274	85202			244551
P35251	RFC1
Q96RT1	ERBIN															179534
Q9Y5X3	SNX5																451393
Q96JC9	EAF1
Q96JB5	CDK5RAP3														270320			356311	95330.1
Q9UGI8	TES
O75152	ZC3H11A
O75165	DNAJC13													375693	273698		556474
Q9P275	USP36
Q8IZP0	ABI1													375123	290128
Q96AX1	VPS33A													142709
Q29RF7	PDS5A
Q6P1R3	MSANTD2
Q8TF74	WIPF2
Q13416	ORC2																398700
O43353	RIPK2													781515	254105
Q9H0G5	NSRP1
O95810	CAVIN2
O75038	PLCH2
Q9H267	VPS33B
Q5T481	RBM20
Q8IUX8	EGFL6
O15126	SCAMP1														373028
P41236	PPP1R2
Q96CP2	FLYWCH2
Q92604	LPGAT1
Q8N436	CPXM2
Q13573	SNW1													53879.6
P78347	GTF2I													223554		80481.4			205606
Q08378	GOLGA3
Q92541	RTF1
Q92667	AKAP1
Q8IVW4	CDKL3
Q92997	DVL3
Q9Y5Z9	UBIAD1
Q9UPA5	BSN
Q8IZD4	DCP1B
Q9C0F1	CEP44
Q9NZM4	BICRA
Q6ZSR9	NA														447336			383385
Q9H6T3	RPAP3
O43172	PRPF4														259168		395575
Q9UKB1	FBXW11
Q6UB99	ANKRD11
P62424	RPL7A						4.97246e+06
Q5VWP2	TENT5C						1294772
O76070	SNCG						392572							388090			391534
Q9BZH6	WDR11						318572
Q96MU7	YTHDC1						225549
P02538	KRT6A						178363
P09493	TPM1						167827							296818		307467
Q9BXB4	OSBPL11						158574							352246	196717
Q7L8J4	SH3BP5L						127150							564882			395617
Q15562	TEAD2						118400
Q9GZY8	MFF						105903
Q6P3W7	SCYL2						74354.8
Q15054	POLD3						48132.9
Q9Y2D1	ATF5
Q9C0E8	LNPK
Q96CV9	OPTN
P35612	ADD2													272168	183134	100060	331029
O60422	ONECUT3
Q9BZE9	ASPSCR1
Q92772	CDKL2
O00425	IGF2BP3													226265	629264	564121	1.15049e+06
Q9Y2K3	MYH15
Q14353	GAMT
P51648	ALDH3A2													167642	814850	600871	793844		277003
Q86UW7	CADPS2
Q63HQ0	AP1AR													284382		115893
Q8WVB6	CHTF18
P04908	H2AC4							3.08326e+07									7744788
O43237	DYNC1LI2							3.69451e+06
Q9Y6N5	SQOR							1.44772e+06
Q92733	PRCC							155850
B6SEH9	ERVV-2							22805.2
Q8TCA0	LRRC20
A3KN83	SBNO1
Q13395	TARBP1
Q9H1N7	SLC35B3
Q15596	NCOA2
Q8NGV6	OR5H6
O60507	TPST1
Q5SRE5	NUP188								1.57033e+07
Q96L93	KIF16B								3.49375e+06
Q8IWI9	MGA
Q4ZG55	GREB1
Q8IYW4	ENTHD1
Q9Y4F5	CEP170B
Q8IUG5	MYO18B
P37837	TALDO1									4.14642e+07
O15371	EIF3D									1.12524e+07
Q8WXH0	SYNE2									3.08266e+06					192148
A6NGC4	TLCD2									1.84174e+06
Q9P015	MRPL15									875113
Q9H3S7	PTPN23									850556
Q14CX7	NAA25									129578			137353
Q96GS6	ABHD17A
Q9P2K5	MYEF2
Q9BV20	MRI1
Q8TEU7	RAPGEF6
Q96ST3	SIN3A
Q2KHR2	RFX7
A8MT33	SYCE1L
Q9UJC3	HOOK1
A8K8P3	SFI1										936319
Q9Y3R5	DOP1B										612578
Q9C0D2	CEP295										181932
Q7Z406	MYH14
Q07001	CHRND
Q6V1P9	DCHS2
Q4G163	FBXO43
Q63HK5	TSHZ3
A0JNW5	BLTP3B
Q96M89	CCDC138
Q6NUM9	RETSAT
Q6ZMZ0	RNF19B
Q16363	LAMA4
P20929	NEB
P10253	GAA												1.19879e+07
Q9Y3Q0	NAALAD2												3.96021e+06
P84022	SMAD3												1.48405e+06
O95630	STAMBP												259661
Q96RY5	CRAMP1
Q16827	PTPRO
Q13627	DYRK1A
O43707	ACTN4													7.65261e+07	2.973e+07		1.07507e+08	9.90035e+07
P52272	HNRNPM													2.22587e+07			7.7663e+07
P61204	ARF3													1.57009e+07		2.27461e+07	2.41044e+07
P39023	RPL3													1.54972e+07			4.00795e+07
O15372	EIF3H													1.46934e+07	5.64355e+06	3.88728e+06
P43243	MATR3													1.06397e+07
Q15019	SEPTIN2													1.01432e+07	3.5723e+06
P62820	RAB1A													8.19197e+06	3.71458e+06
O95373	IPO7													7.63029e+06
P26639	TARS1													6.56232e+06	2.91229e+06	1.01991e+06
Q03518	TAP1													5.45537e+06
Q5JWF2	GNAS													4.23323e+06
A8MWD9	SNRPGP15													3.17931e+06	1.58241e+06			4.83353e+06
Q92616	GCN1													2.74753e+06	940694	1.97695e+06
P37108	SRP14													2.67388e+06
P18206	VCL													2.61195e+06	1.4452e+06		7.37988e+06	5.85341e+06	1.44975e+06
Q9Y230	RUVBL2													2.30966e+06
P51572	BCAP31													2.29946e+06	968647	556907	7.37333e+06	5.33882e+06
P05556	ITGB1													1.64401e+06	582788	276448	6.20978e+06	2.66672e+06
Q9UKV0	HDAC9													1.28614e+06			944510
Q14152	EIF3A													1.23499e+06
Q9UMS5	PHTF1													1.15935e+06
Q8NE71	ABCF1													978294
Q93079	H2BC9													971493				967704
P08240	SRPRA													958880
Q9HCK8	CHD8													922078	708566
Q9ULT8	HECTD1													848326
P49321	NASP													829216	180825
P61956	SUMO2													813377			3046502
Q86W92	PPFIBP1													796481
Q70Z53	FRA10AC1													725746					379213
O14950	MYL12B													697786	375505
Q9UQR1	ZNF148													680935	587895	485219
Q6P158	DHX57													647109			187322		532649
Q13470	TNK1													645848				207598
Q96GC9	VMP1													602800
P63208	SKP1													563429
Q9H2H8	PPIL3													483139
Q15417	CNN3													461041
Q96PU5	NEDD4L													445182	324956
Q86TM6	SYVN1													430860	422912		486239	388962	121667
Q15369	ELOC													429275				352353
Q9NW64	RBM22													427752
Q96DT5	DNAH11													414729
Q7Z460	CLASP1													410624	178988
Q9UNF1	MAGED2													394987		74828
Q96LD4	TRIM47													392640
Q8N5K1	CISD2													371431	180128		813078	700659
Q16143	SNCB													356658	388921		940339
Q00613	HSF1													341631	237978	186497	321291		130528
Q6I9Y2	THOC7													329374	137318	226723
Q92817	EVPL													311253	1727188	491404		2.48628e+06	306973
Q9HAT2	SIAE													308353
Q7Z6G8	ANKS1B													290785
P40692	MLH1													282571	138412				1.05745e+06
Q7RTV0	PHF5A													282228
Q96AY2	EME1													264436
Q9Y6A5	TACC3													257357	124353	131983
Q9HCK1	ZDBF2													256396		126405
Q9NX08	COMMD8													254893	359304
Q8IX90	SKA3													247009	165459				120495
Q9UHY1	NRBP1													244540	167595
P46937	YAP1													240168				995521
Q9Y4K1	CRYBG1													225515		849211
Q8NFJ5	GPRC5A													218472	137997
O43670	ZNF207													213748
A7KAX9	ARHGAP32													206896
Q8N6V9	TEX9													204243
P53350	PLK1													198124
P63313	TMSB10													193769	148292
Q9UBF8	PI4KB													193580
Q92974	ARHGEF2													193368
Q96H55	MYO19													192319
Q9NXT0	ZNF586													186814
Q9Y2G3	ATP11B													183764	172438
P49643	PRIM2													178125	144091
Q5JRA6	MIA3													165429
Q6R327	RICTOR													158606
Q9NP79	VTA1													145914
Q96JQ2	CLMN													140941
Q53GS7	GLE1													135750
Q5T1M5	FKBP15													128552
Q5T7W7	TSTD2													121870
P78380	OLR1													121840
Q9C0K0	BCL11B													104297
P42658	DPP6													95960.6
Q13315	ATM													65980.2
Q7Z5L9	IRF2BP2													44638.7
Q13123	IK													39946.1	591577	758686
Q9Y6D9	MAD1L1															125908		100015
O95163	ELP1
Q96KB5	PBK																138277
Q06124	PTPN11														197796	256416	2.09199e+06		3.35898e+06
P53365	ARFIP2
Q92597	NDRG1
P00918	CA2
Q5KSL6	DGKK
Q9C0B7	TANGO6
O96006	ZBED1
P60981	DSTN
O76080	ZFAND5
O43447	PPIH
Q9H4G0	EPB41L1															80211.5
Q9BW85	YJU2
Q9NUL3	STAU2
Q15654	TRIP6
Q9Y5Q8	GTF3C5														87317.5	198249
Q99567	NUP88																	72198.9
O75312	ZPR1
Q99996	AKAP9
Q8N806	UBR7
Q7Z3U7	MON2
Q9BY42	RTF2
Q658P3	STEAP3
Q92620	DHX38
P19484	TFEB
Q8WYL5	SSH1
Q06787	FMR1
P23193	TCEA1
Q96SB3	PPP1R9B
Q8NEY1	NAV1															118979
O14795	UNC13B
Q8WYP5	AHCTF1
O15069	NACAD														277801
Q7Z478	DHX29
P13796	LCP1
Q9Y5E7	PCDHB2
P35240	NF2
Q9NQS1	AVEN
Q13439	GOLGA4														309869
Q14207	NPAT
P62328	TMSB4X														171020
Q9UHI6	DDX20
Q8IY18	SMC5																	226161
O14593	RFXANK
Q14789	GOLGB1																172575
P50613	CDK7
O75410	TACC1
Q9NS91	RAD18
Q9NVZ3	NECAP2
Q99767	APBA2
Q8NFX7	STXBP6
Q9H788	SH2D4A
Q9Y5L0	TNPO3
Q66PJ3	ARL6IP4
Q969G3	SMARCE1
Q13625	TP53BP2
P42263	GRIA3
Q9NX40	OCIAD1
Q9Y450	HBS1L
O75351	VPS4B
O95905	ECD
P35221	CTNNA1														201776
O43572	AKAP10
P61024	CKS1B
O43493	TGOLN2																866520	734873	155743
Q6VY07	PACS1
Q13112	CHAF1B
Q96EX1	SMIM12
Q9NTG1	PKDREJ
Q8NEG5	ZSWIM2															499467	995110
Q99614	TTC1
Q9Y281	CFL2																487186
O95793	STAU1
P10636	MAPT
Q9UJV9	DDX41
Q562E7	WDR81
O75794	CDC123
Q03188	CENPC
Q9GZN8	ADISSP
O60826	CCDC22
P25490	YY1
Q7Z2Z2	EFL1
Q9UJF2	RASAL2
Q96M96	FGD4
P13861	PRKAR2A
Q8WUM0	NUP133
Q8NDX5	PHC3
Q96RU3	FNBP1
P28290	ITPRID2
Q6ICL3	TANGO2
P82979	SARNP
Q9Y6R0	NUMBL
Q8N720	ZNF655
Q15678	PTPN14															214737
O15234	CASC3
Q76G19	PDZD4
Q9NRG0	CHRAC1
P0DMB2	C8orf88
Q02241	KIF23
Q5VV42	CDKAL1
O14966	RAB29
P05141	SLC25A5														8.11351e+07
P14868	DARS1														1.14956e+07
O43169	CYB5B														3.41454e+06
P04792	HSPB1														2.37314e+06
P55884	EIF3B														2.3079e+06
E9PAV3	NACA														2.24718e+06
P51809	VAMP7														904639
Q01082	SPTBN1														868060	1.63849e+06
Q92802	N4BP2L2														776987
Q9NPQ8	RIC8A														768603	1.44249e+06
Q13547	HDAC1														503448
P35268	RPL22														494638
Q06210	GFPT1														414386	126290			1.26017e+06
P38117	ETFB														260528
O60869	EDF1														191297
Q13541	EIF4EBP1														165656
O94776	MTA2														112858
Q03001	DST														76502.6
Q16181	SEPTIN7														67535		1.15413e+06
Q96FC7	PHYHIPL														58851.7
Q9Y263	PLAA
Q86TB9	PATL1															112284
Q96A49	SYAP1
P21359	NF1
P22061	PCMT1
Q9UKJ3	GPATCH8
O75822	EIF3J
Q53H96	PYCR3
Q14676	MDC1
Q9BZ95	NSD3
Q9UNS1	TIMELESS
Q86YP4	GATAD2A
Q9C0J8	WDR33
Q8N165	PDIK1L
Q9ULR0	ISY1
Q01968	OCRL
Q8IYB1	MB21D2
Q9NYL9	TMOD3
Q5T5U3	ARHGAP21
Q9NPI6	DCP1A
Q9H1H9	KIF13A
P18887	XRCC1																225460
Q03164	KMT2A
Q86X53	ERICH1
Q8IWB9	TEX2
Q9Y4K4	MAP4K5
Q8N1G0	ZNF687
O43156	TTI1
Q9Y446	PKP3
Q9Y2X9	ZNF281															380123
Q14186	TFDP1
Q9UPS8	ANKRD26
Q96BP3	PPWD1
O43426	SYNJ1
Q9NUY8	TBC1D23
Q13263	TRIM28															6.01443e+06
P54578	USP14															2110973
Q8TCG1	CIP2A															685424
Q14814	MEF2D															609180
P30533	LRPAP1															562329
Q14195	DPYSL3															355112
P84157	MXRA7															214511	872997
P47756	CAPZB															189612
Q96P70	IPO9															158074		946942	1.4963e+06
P29966	MARCKS															133097		1.10989e+06
P09497	CLTB															92687.4
Q4VC31	MIX23
P23511	NFYA
P53801	PTTG1IP
Q96IK1	BOD1
Q69YQ0	SPECC1L
Q8N4V1	MMGT1
Q9Y2H6	FNDC3A
Q6PD74	AAGAB
O94875	SORBS2
Q6NSI4	RADX
Q9BRG1	VPS25
P49753	ACOT2
O95239	KIF4A
P57076	CFAP298
O75643	SNRNP200																2.06373e+07
Q16777	H2AC20																5.84689e+08
P34931	HSPA1L
P43121	MCAM																207210
Q9Y2K7	KDM2A
Q15836	VAMP3																2749770
Q9P0P8	MTRES1
Q96C24	SYTL4																124677
Q86VQ0	LCA5
Q9UEE5	STK17A
Q8IXQ3	C9orf40
Q76M96	CCDC80																817771
Q8IZ21	PHACTR4																1.18385e+06
Q5JTC6	AMER1																378384	335260	244122
Q629K1	TRIQK																339840
Q5SYE7	NHSL1
Q9GZT6	CCDC90B
O75334	PPFIA2
P46100	ATRX
Q13613	MTMR1																259270
Q9BX63	BRIP1
P49454	CENPF
Q15029	EFTUD2																	1.9136e+07
Q02539	H1-1
Q12872	SFSWAP
P43146	DCC																	715277
Q719H9	KCTD1																	577720
P41208	CETN2																	346133
Q5VVW2	GARNL3																	3.5589e+06
Q8IZD9	DOCK3
Q9UP79	ADAMTS8
O00291	HIP1
O95259	KCNH1
Q0VDD8	DNAH14
P09172	DBH
Q5QGS0	NEXMIF
Q9H8X9	ZDHHC11
P78371	CCT2																		2.47118e+07
Q8WWH5	TRUB1																		463181
Q99880	H2BC13																		387186
Q9BZJ0	CRNKL1																		111436
Q9NRM1	ENAM
Q5T3I0	GPATCH4
A4UGR9	XIRP2
Q96PC5	MIA2
Q02040	AKAP17A
Q9H7F4	TMEM185B
Q8TCD6	PHOSPHO2
Q9NZ43	USE1
Q5SVZ6	ZMYM1

## Sheet: Input for DEP processing
Accession	Gene Name	rawprot_FL1	rawprot_FL2	rawprot_FL3	rawprot_FP1	rawprot_FP2	rawprot_FP3	rawprot_SL1	rawprot_SL2	rawprot_SL3	rawprot_SP1	rawprot_SP2	rawprot_SP3
P60709	ACTB	4.3878e+08	5.41026e+08	4.719e+08	2.86375e+08	5.42996e+08		4.56913e+08	3.13222e+08	2.06289e+08	1.18576e+09	9.40113e+08	3.36514e+08
Q09666	AHNAK	3.0764e+08	2.10434e+08	1.43925e+08	2.75456e+08	3.00264e+08	1.30493e+08	9.17862e+08	7.90666e+08	4.96909e+08	7.75433e+08	6.21329e+08	3.40901e+08
P14618	PKM	2.50293e+08	6.69469e+08		4.78341e+08	2.20647e+08	1.0142e+08	3.36905e+08	1.48469e+08	1.11153e+08	4.54435e+08		5.27385e+08
P04406	GAPDH	2.0907e+08	3.24169e+08			1.4899e+08	6.30682e+07	1.92026e+08	9.03988e+07	7.51869e+07	4.38457e+08
P68104	EEF1A1	2.0744e+08	3.00236e+08	2.66081e+08	2.33792e+08	1.78329e+08	1.03105e+08	2.8141e+08	1.55617e+08	7.55043e+07	4.27412e+08	3.65511e+08	2.35011e+08
Q16778	H2BC21	1.99943e+08	7.04899e+07	2.06839e+07	4.68684e+07	1.71198e+08	8.83323e+07	3.89609e+07	1.50119e+08	1.31109e+08	5.05435e+07	5.20107e+07	7.56882e+07
P62805	H4C1, H4C2, H4C3, H4C4, H4C5, H4C6, H4C7, H4C8, H4C9, H4C10, H4C11, H4C12, H4C13, H4C14, H4C15, H4C16	1.59891e+08	2.56061e+08	1.19863e+08	1.39045e+08	1.55399e+08	5.72743e+07	3.04221e+08	1.33657e+08		6.87771e+08		2.64833e+08
P08670	VIM	1.1453e+08	1.21971e+08	7.4005e+07	6.94857e+07	1.0573e+08	4.36072e+07	2.40281e+08	1.53839e+08	1.00154e+08	4.97686e+08	3.71289e+08	1.25206e+08
P84243	H3-3A, H3-3B	8.93791e+07							5.56073e+07		3.55504e+08	3.18487e+08	239969
P35579	MYH9	5.9579e+07	1.63325e+08	8.26888e+07	8.05831e+07	5.18634e+07	2.01884e+07	7.34435e+07	3.04668e+07	3.32264e+07	1.28001e+08	1.10457e+08	1.4692e+08
P08238	HSP90AB1	5.49616e+07	6.32362e+07	4.55842e+07	3.11838e+07	4.76379e+07	2.67526e+07	6.65503e+07	3.11832e+07	1.24815e+07	1.4456e+08	1.48847e+08	5.53064e+07
P11142	HSPA8	5.45519e+07	7.02824e+07	4.94495e+07	3.57884e+07	4.64839e+07	3.23892e+07	7.78405e+07	4.3629e+07	3.46261e+07	2.2324e+08	1.85483e+08	5.98439e+07
Q00839	HNRNPU	5.35375e+07	7.75582e+07	3.11865e+07	3.35973e+07	2.6393e+07	2.30255e+07	7.88147e+07	4.55112e+07	5.1043e+07	1.23448e+08	1.19407e+08	5.63436e+07
P07355	ANXA2	5.2153e+07	1.08267e+08	5.78441e+07	5.01554e+07	4.72558e+07	2.05358e+07	8.62065e+07	5.08668e+07	3.88767e+07	1.33541e+08	1.36144e+08	9.8595e+07
P09651	HNRNPA1	4.99769e+07	1.03796e+08	4.39084e+07	6.07548e+07	4.87172e+07	2.06155e+07	7.39644e+07	2.75488e+07	2.09085e+07	1.16193e+08	1.50521e+08	8.46014e+07
Q08211	DHX9	4.98671e+07	1.36782e+08	7.73066e+07	8.0347e+07	4.48645e+07	2.05138e+07	6.87645e+07	3.0567e+07	2.52213e+07	9.49299e+07	1.0976e+08	1.42333e+08
Q6P2Q9	PRPF8	4.55523e+07
Q05639	EEF1A2	4.53629e+07	7.39746e+07	5.2505e+07	4.26102e+07	3.24919e+07	1.73979e+07	3.31018e+07	1.70224e+07	8.66887e+06	5.38315e+07	3.50761e+07	7.43261e+07
P06748	NPM1	3.73524e+07	4.63818e+07	3.08087e+07	2.44859e+07	4.10887e+07	1.67868e+07	5.68803e+07	3.05621e+07	2.75031e+07	1.55855e+08	1.2495e+08	4.68083e+07
Q06830	PRDX1	34899551	5.96938e+07	3.40414e+07	4.38032e+07	2.87586e+07	1.19655e+07	4.66976e+07	1.69154e+07	1.48057e+07	7.14352e+07		3.51644e+07
P19338	NCL	2.70421e+07	4.65745e+07	28271420	2.45805e+07	3.04373e+07	1.09066e+07	3.42851e+07	1.66026e+07	9.70944e+06	7.6352e+07	6.75963e+07	2.79208e+07
Q02878	RPL6	2.57099e+07	4.98886e+07	3.07801e+07	3.57208e+07	2.46741e+07		2.95032e+07	1.16217e+07
P11413	G6PD	2.36772e+07	1.11646e+08	4.66331e+07	3.32462e+07	2.186e+07	1.08135e+07		6.96095e+06	3.65788e+06		1.59642e+07
P15880	RPS2	2.3462e+07	2.53111e+07	1.3626e+07	3.52945e+07	2.03064e+07	8.40827e+06	2.2103e+07	1.15585e+07	7.76502e+06	4.80324e+07	3.14465e+07	1.75332e+07
P29692	EEF1D	2.25723e+07	1.46099e+07	1.19665e+07	1.38472e+07	1.72935e+07	8.06679e+06	5.58848e+06	2.86932e+06	2.83924e+06	1.36573e+07	1.50798e+07	4.20695e+06
P49327	FASN	2.13132e+07	4.92543e+07	1.81867e+07	1.76357e+07	1.88049e+07	5.82408e+06	5.58456e+07	4.41813e+07	3.35972e+07	5.16137e+07	3.75229e+07	3.75247e+07
P49773	HINT1	2.11307e+07	4.16439e+07	2.25396e+07	2.54624e+07	1.58366e+07	7.34517e+06	1.82058e+07	1.167e+07	7.24593e+06	2.23764e+07	1.62976e+07	2.19316e+07
P67936	TPM4	2.04758e+07	1.68385e+07	1.93368e+07	1.02433e+07	1.71598e+07	6.14056e+06	2.74732e+07	1.44055e+07	1.16768e+07	5.70987e+07	7.25952e+07	1.27881e+07
Q15233	NONO	2.03644e+07	2.83473e+07	2.27989e+07	1.47829e+07	3.04465e+07	2.26199e+07	2.67068e+07	2.5913e+07	3.19961e+07	4.06034e+07	3.1958e+07	2.05412e+07
Q7L014	DDX46	1.95916e+07	2.81625e+07	1.44666e+07	2.38856e+07	1.54203e+07	8022546	1.64722e+07	1.18752e+07	7.2491e+06	1.67234e+07	1.48173e+07	1.32286e+07
O75821	EIF3G	1.95818e+07	6.11669e+07	4.16183e+07	2.93266e+07	1.46825e+07	7.67849e+06	1.70831e+07	7.11007e+06	6.59254e+06	1.57756e+07		3.15281e+07
Q9Y5K6	CD2AP	1.91883e+07	1.36729e+07	1.13072e+07	1.70906e+07	1.78697e+07	9.6332e+06	2.07813e+07	1.93714e+07	9.98552e+06	1.46878e+07	8.43848e+06	6.0653e+06
P13639	EEF2	1.90833e+07	6.21764e+07	1.78852e+07	1.43682e+07	1.88902e+07	8.51393e+06	2.88309e+07	1.29992e+07	8.68661e+06	7.99959e+07	77808180	2.30234e+07
P12270	TPR	1.86881e+07	1.84102e+07	1.36615e+07	2.00393e+07	1.76251e+07	8.42166e+06	5.06053e+07	4.55722e+07	2.945e+07	4.2024e+07	4.17187e+07	2.48349e+07
P37802	TAGLN2	1.82326e+07	1.65957e+07	1.12123e+07	1.22585e+07	1.6867e+07	8.14699e+06	3.83385e+07	3.01815e+07	1.60321e+07	4.67956e+07	4.0508e+07	1.58212e+07
Q15365	PCBP1	1.7146e+07				1.4245e+07	4.93027e+06				2.41924e+07
P15531	NME1	1.68689e+07				6.08992e+06			2.19558e+06		1.32273e+07
Q9UBF2	COPG2	1.67623e+07	1.26383e+07	9.45207e+06	1.37636e+07	1.42628e+07	6.70302e+06	2.82871e+07	2.15512e+07	1.4182e+07	2.45523e+07	1.49649e+07	1.15562e+07
P07737	PFN1	1.61172e+07	4.03553e+07	2.11974e+07	2.59396e+07	1.67978e+07	6.94727e+06	2.17887e+07	1.25057e+07	8.7891e+06	2.80265e+07	2.92185e+07	2.12736e+07
Q5QNW6	H2BC18	1.61066e+07	2.96934e+06	3.09145e+06	1.37719e+06	2.0326e+07	5.61644e+06		1.19766e+06	806991	562778		6.64495e+06
P61160	ACTR2	1.56673e+07				1.26016e+07
O75369	FLNB	1.53437e+07	4.47495e+07	2.27947e+07	2.62867e+07	1.46893e+07	5.73351e+06	1.81456e+07	7.65622e+06	5.6264e+06		2.23784e+07	2.29948e+07
Q16666	IFI16	1.4663e+07	3.50491e+07		2.30736e+07	1.21831e+07	4.27153e+06	1.30294e+07	4.76053e+06	2.52545e+06	1.45363e+07		1.72724e+07
Q13501	SQSTM1	1.46107e+07			1.26502e+07		4.66803e+06	1.86467e+07	1.53463e+07	2.07283e+07	4.25001e+07	3.13243e+07	2.01845e+07
O94842	TOX4	1.45518e+07	1.15204e+07	9.88528e+06	1.58031e+07	1.34856e+07	6.34226e+06	2.64244e+07	1.94394e+07	1.2836e+07	2.52124e+07	2.20366e+07	9.64837e+06
P55010	EIF5	1.34583e+07	1.45392e+07	9.51381e+06	1.44077e+07	1.38846e+07	6.66488e+06	2.40193e+07	1.53622e+07	1.01323e+07	1.73088e+07	1.1518e+07	9147593
P55072	VCP	1.23587e+07			1.28714e+07	7.72502e+06	4.79468e+06	1.25571e+07	4.38042e+06	3.37208e+06	3.2324e+07
Q7KZF4	SND1	1.23224e+07	3.49477e+07	1.98859e+07	2.08944e+07	1.35225e+07	5.23858e+06	1.2555e+07	6.10608e+06	3.82089e+06	1.71465e+07	1.2806e+07	1.04868e+07
P68032	ACTC1	1.19284e+07	1.23085e+07	891853	6.64609e+06	1.16274e+07		1.38792e+07	6.255e+06	3372772	4.90983e+07	3.87546e+07	1.99706e+07
P07900	HSP90AA1	1.16472e+07	1.62714e+07	1.20556e+07	8.05672e+06	8.55873e+06	5.12292e+06	1.93163e+07	10480312	1.94874e+07	4.63721e+07	3.54251e+07	1.57736e+07
P84098	RPL19	1.13624e+07	2.32439e+07	1.23499e+07	1.31366e+07	1.75511e+07	9.0032e+06	1.2983e+07	8.93141e+06	9.5061e+06	2.29362e+07		1.2529e+07
P61247	RPS3A	1.07607e+07	1.12433e+07	7.89784e+06	5.803e+06	1.07136e+07	3.43923e+06	1.76851e+07	8.12082e+06	5.64297e+06	4.01827e+07	3.9699e+07	9.44343e+06
P26038	MSN	1.06658e+07	1.5892e+07		1.04507e+07	1.56366e+07	3.88632e+06	1.59454e+07		4.86063e+06	3.50675e+07	3.37776e+07	2.16174e+07
Q86XP3	DDX42	1.00066e+07	5.74062e+06		2.44091e+06	1.34498e+06	403826	798197	721737	1.95051e+06
P27635	RPL10	9.50121e+06
Q8NC51	SERBP1	9.39152e+06	7.18525e+06	5.88148e+06	7.81775e+06	8.04988e+06	1.35293e+06	1.31797e+07	9.56638e+06	5.95603e+06	2.06507e+07	1.67353e+07	5.37257e+06
Q9UHB6	LIMA1	9.3778e+06	1.77209e+07	7.97712e+06	1.31315e+07	1.23611e+07	4.88445e+06	2.86825e+07	1.88649e+07	1.24118e+07	2.73629e+07	2.71282e+07	1.50417e+07
P42166	TMPO	9.00851e+06	3.68129e+07	1.7052e+07	1.68326e+07	8.28207e+06		1.10734e+07	168935		1.47278e+07	1.78608e+07	2.09996e+07
Q01518	CAP1	8.69574e+06	2.05848e+07	1.18051e+07	8.9939e+06	8.10476e+06	3.72009e+06	1.18316e+07	2.96199e+06	2.88987e+06	1.91006e+07	1.75305e+07	1.67888e+07
P78344	EIF4G2	8.61652e+06	9.01056e+06		6.82362e+06	5.52734e+06	5.34852e+06	7.04554e+06	5.92614e+06	4.30647e+06	7.85564e+06	4.79009e+06	4.94188e+06
O15347	HMGB3	8.27291e+06	2.84683e+07	1.39054e+07	2.32545e+07	1.20936e+07	2.74544e+06	1.02089e+07	2.8987e+06
Q9UHR5	SAP30BP	8.0658e+06	7.32202e+06	5.95364e+06	8.02715e+06	8.53853e+06	4.27458e+06	1.61079e+07	1.28532e+07	9.88184e+06	1.33642e+07	1.11351e+07	8.67551e+06
Q99460	PSMD1	7.64128e+06	3.55962e+07	1.43865e+07	1.37151e+07	7.62534e+06		7.49114e+06	3.7698e+06	3.80071e+06	1.06306e+07	1.16846e+07	2.42366e+07
Q99426	TBCB	7462201		1.53142e+07			2.6837e+06	9.09854e+06		2.72619e+06	9.37861e+06	6.70793e+06
P98175	RBM10	7.20682e+06	2.94581e+06	1.64406e+06	4.97364e+06	3.04336e+06	2.51985e+06	8.84635e+06	5.82129e+06	3.90974e+06	7.10711e+06	2.44989e+06	2.45788e+06
P50990	CCT8	7.195e+06	2.0187e+07	7.44661e+06	6.41496e+06	5.41763e+06	2.00812e+06	7.652e+06	1.49307e+06	1.32768e+06	2.2843e+07	1.80613e+07	9.48222e+06
P54136	RARS1	6.90742e+06	1.96576e+07	9.98927e+06	9.33094e+06	7.35147e+06	2.66389e+06	1.36124e+07	7.93601e+06	5.25601e+06	1.51522e+07	1.27401e+07	1.23554e+07
P50479	PDLIM4	6842398	3.92715e+06	3.06851e+06	3.85315e+06	6.54336e+06	2837645	1.03864e+07	6.04063e+06		1.2956e+07	9515140	4624906
Q9Y2J2	EPB41L3	6.76737e+06	5.66171e+06	4.25582e+06	6.28708e+06	7.0363e+06	4.07544e+06	1.1626e+07	2.59046e+07	5.99098e+06	9.70608e+06	9.27048e+06	6.23316e+06
Q07065	CKAP4	6.74935e+06	1.55592e+07	8.88984e+06	5.27155e+06	1.05613e+07	2.93177e+06	1.16959e+07	3.84232e+06	3.41531e+06	3.8238e+07	3.25672e+07	1.05136e+07
O43809	NUDT21	6.72461e+06		1.48536e+07		1.11422e+07				3.17343e+06	1.19039e+07
Q9P0K7	RAI14	6.38603e+06	6.08477e+06	4.14e+06	5.86689e+06	6.91704e+06	2.50363e+06	3.03352e+07	2.24903e+07	9.64869e+06	2.33163e+07	1.83858e+07	7.48759e+06
P49792	RANBP2	6.37058e+06	2.68908e+07		9.21826e+06	5.31936e+06	1.92583e+06	7.06749e+06	3.60333e+06	9.43006e+06	9.8457e+06	3.09822e+07	2.32459e+07
P30419	NMT1	6072381							2.78133e+06	1.50472e+06	5.08962e+06	4413839
Q9Y2W1	THRAP3	5.8851e+06	6.66406e+06	3.34697e+06	6.93392e+06	4.8776e+06	1.40406e+06	5.37825e+06	3.27989e+06	2.72077e+06	6.04572e+06	5.01399e+06	5.11966e+06
Q96JH7	VCPIP1	5.87805e+06	5.81973e+06	4.56925e+06	5.07397e+06	5.89169e+06	2.57023e+06	5.16339e+06	3661432	2.06019e+06	3.77365e+06	2.75497e+06	3.24903e+06
Q9NZC7	WWOX	5.84181e+06	298928	2.77619e+06	4.9756e+06	164161		5.98554e+06	4401825	2.90854e+06	4.6608e+06	5408060	2.40766e+06
Q93009	USP7	5.82796e+06	1.51952e+07	4.55087e+06	1.56619e+07	7.74807e+06	1.85241e+06	8.48898e+06	6.27661e+06	2.29717e+06	5.31287e+06	8.18316e+06	1.26644e+07
Q07960	ARHGAP1	5.75811e+06						5.86436e+06	2.21129e+06		4.29724e+06
P47712	PLA2G4A	5.58445e+06	5.42593e+06	1.68243e+06	5.84054e+06	3.50696e+06	1.4522e+06	6.2593e+06	5.43829e+06	3.3781e+06	4.40237e+06	6.14648e+06	9.09915e+06
P60866	RPS20	5.56008e+06	7.30789e+06	2.06164e+06	3.64526e+06	4.33495e+06	1.48064e+06	8.5409e+06	3.82011e+06	722806	2.29814e+07	1.75215e+07	6.36355e+06
P42224	STAT1	5.52313e+06	4891842	3924633	4809000	6.10027e+06	2.6105e+06	8691955	7.42954e+06	4513307	7.98667e+06	6.12857e+06	3.8059e+06
Q05682	CALD1	5.50188e+06	2.93263e+06	3.4791e+06	6.18826e+06	8.186e+06	2.75562e+06	1.149e+07	8.07077e+06	3.63366e+06	8.84277e+06	7.68974e+06	1.84115e+06
Q8TEQ6	GEMIN5	5.43329e+06	6.34127e+06	3.30607e+06	946097	5.12854e+06	2.33251e+06	4.23276e+06	2.60208e+06	1.69731e+06	2.64763e+06		1868733
P25685	DNAJB1	5.42962e+06	5.73033e+06	5.33386e+06	5.78019e+06	5.90675e+06	2.9728e+06	1.05948e+07	7.97691e+06	4411344	9.28622e+06	7.69881e+06	4.15748e+06
O60664	PLIN3	5.04097e+06	4.49507e+06	1.05392e+06	815844	4.47532e+06	2.26845e+06	9.88545e+06	5.213e+06	6.13846e+06	1.00651e+07	3.91613e+06	3.67771e+06
Q9P013	CWC15	5.0078e+06	5217327	3.7972e+06	5.73478e+06	5.59087e+06	1.70929e+06	5000329	3.19301e+06	2.06272e+06	4.69068e+06	3.18967e+06	1.44757e+06
Q13435	SF3B2	4.99319e+06	1.04673e+06	1.1076e+06	3.69336e+06	4.06007e+06	1.11799e+06	1.43944e+07	6.03688e+06	3.26717e+06	1.64755e+07	6.84557e+06	2.20883e+06
P83731	RPL24	4.91969e+06	1.30016e+07	6.43614e+06	8.48523e+06	3.33108e+06	1.33603e+06	9.1947e+06	2.49854e+06	2.59374e+06	1.2792e+07	1.16336e+07	7.6583e+06
P11940	PABPC1	4.78482e+06	1.41002e+07	5.63638e+06	4.40659e+06	5.47855e+06	2.18906e+06	6.1719e+06			2.23521e+07		7.54277e+06
Q9H307	PNN	4.72815e+06	5.16969e+06	3.3137e+06	6.95653e+06	6.00036e+06		1.91567e+07	1.48638e+07	1.06407e+07	2.31985e+07	1.71575e+07	1.14427e+07
Q9Y265	RUVBL1	4.60241e+06	1.0137e+07	5.82417e+06	5151030	4.73055e+06	2.27641e+06	3.69974e+06	2.04576e+06	1.12832e+06	5.88669e+06	5.56837e+06	3.55881e+06
P51610	HCFC1	4.59595e+06	5.01086e+06	2.45745e+06	6.08795e+06	7.20953e+06	1.85741e+06	6.39225e+06	7.86594e+06	5.01412e+06	6.95593e+06	3.38551e+06	2.64566e+06
Q04637	EIF4G1	4.52069e+06	1.04587e+07	3.115e+06	7.26665e+06	8.58905e+06	4.00229e+06	1.18915e+07	8.90346e+06	4.98538e+06	4.29881e+06	1.00715e+07	4.28934e+06
O15173	PGRMC2	4.36398e+06	5.87337e+06	2.56336e+06	2060986	6.0684e+06	185653	8.89477e+06	2232594	3.68122e+06	1.02818e+07	5.80274e+06	4.31969e+06
Q13442	PDAP1	4.36082e+06	5.55956e+06	1.65679e+06	4.40322e+06	4.22527e+06	1.87883e+06	7.00752e+06	7.26268e+06	1.928e+06	7.20728e+06	5.32955e+06	1.70949e+06
O00193	SMAP	4.32947e+06	4.17848e+06	3.78888e+06	4.7817e+06	4.58571e+06	2.62634e+06	5.0904e+06	3.14625e+06	2.31158e+06	4.29672e+06	3.13203e+06	2.38982e+06
P23246	SFPQ	4.2569e+06		3.82655e+06	4.06885e+06	1.0441e+07		8.19456e+06	4.62861e+06	4.34472e+06
Q14980	NUMA1	4.13437e+06	5.90294e+06	3.47389e+06	4.09607e+06	4.29205e+06	1735756	4.5265e+06	2.93682e+06	1.91426e+06	6.58486e+06	5.68028e+06	5.8307e+06
P48444	ARCN1	4.00291e+06	1.77508e+07	1.11185e+07	8.51855e+06	4.73786e+06	2.34831e+06	4.66116e+06	2.44578e+06	2.07183e+06	6.86303e+06	6.48551e+06	8.707e+06
Q15942	ZYX	3.98261e+06	2.90195e+06	1.61134e+06	3.94041e+06	4.24165e+06	1.37301e+06	4.21695e+06	2.99502e+06	1.81874e+06	5.2e+06	1.87746e+06	1.21879e+06
Q8N163	CCAR2	3.91791e+06				3.66019e+06	1.07448e+06	4.52838e+06	2.21774e+06	1.78384e+06	9.37222e+06
Q9HCS7	XAB2	3656810	3.7485e+06	2.4946e+06	3.35286e+06	3.88052e+06	1955731	4.9163e+06	3.09577e+06	2.37477e+06	2.88772e+06	3.69206e+06	5.05534e+06
O00541	PES1	3.60003e+06			8.51545e+06	4.69151e+06		7.112e+06	3.08328e+06	1.63626e+06
Q9UIF9	BAZ2A	3.53744e+06	2778697	1.51486e+06	2.625e+06		685294		2.02433e+06	446718	2.22985e+06
Q86T24	ZBTB33	3.46354e+06		1655109	2.4918e+06	3.29003e+06	1.63994e+06	4.98016e+06	3.62429e+06	3.45014e+06	3.21671e+06	3.26873e+06	2.48601e+06
Q7Z4V5	HDGFL2	3.45643e+06	1.12285e+07	5225272	5.30276e+06	3.2586e+06	1.40378e+06
Q9BQ61	TRIR	3.20904e+06	2.70795e+06	1.05936e+06	806230	1.38499e+06	1.01054e+06	3.85034e+06	3.01403e+06	2.3989e+06	1.90333e+06	1.15316e+06	680384
P15311	EZR	3.1408e+06	1.71662e+07	9.1028e+06	6.25984e+06	3.92692e+06	832382	4.61927e+06	730397	1.31733e+06	7.96339e+06	7.4781e+06	8.14299e+06
Q15056	EIF4H	3.13919e+06	2.58683e+06	1.85244e+06	3.00028e+06	3.20842e+06	834251	3.45355e+06	2.21594e+06	1.84814e+06	5.88374e+06	5.16327e+06	2.14267e+06
Q9P258	RCC2	3.08364e+06	1.1153e+07		2.85021e+06	2.70298e+06		3.89412e+06	194097	75753.5	2.7659e+06		7134867
Q9Y266	NUDC	3.0669e+06	2.27002e+06	50694.8	1.27798e+06	3.06944e+06	980132	6.71021e+06	3.5379e+06	2.88273e+06	8.38731e+06	8.03627e+06	1.81352e+06
P09661	SNRPA1	3.05282e+06	6.86561e+06	280897	3.81228e+06	3.09919e+06	1.22134e+06	2.61577e+06	144848	951397		4.00598e+06	2.07311e+06
Q9Y490	TLN1	3.03018e+06	1.99649e+07	5.89414e+06	5.17025e+06	5.99797e+06	1.96921e+06	8.14385e+06	4.32489e+06	3.90474e+06	1.37051e+07	8.69013e+06	5.98946e+06
O60264	SMARCA5	3.00134e+06		7.41203e+06		3.39091e+06	1.61989e+06	4.79486e+06	1.28091e+06	2.29581e+06	9.48924e+06	8.41951e+06
P27816	MAP4	2.89632e+06	3.14059e+06	1.46426e+06	2.20492e+06	2.8197e+06	1.04266e+06	4.08513e+06	2.40492e+06	1.56237e+06	5.4421e+06	4.98249e+06	1.76116e+06
O75182	SIN3B	2.84963e+06	3.05328e+06		2200645	3297743	1.01269e+06	4.04445e+06	2052860	2.25833e+06	3.11792e+06	3.10747e+06	1.8849e+06
Q9UHX1	PUF60	2.79111e+06	3.47365e+06	1.94593e+06	2.38245e+06	4.04218e+06	1.41777e+06	3.605e+06	2.47788e+06	1.55559e+06	4.2458e+06	3.88358e+06	1.45102e+06
O60563	CCNT1	2.76249e+06	3.14838e+06	2.17737e+06	2.90921e+06	3.96288e+06	1.82207e+06	2.67923e+06	2.6085e+06	1.82113e+06	1.50439e+06	1.23202e+06	2.19249e+06
P40121	CAPG	2.75229e+06	2.90117e+06	1.98583e+06	7.50027e+06	3.07274e+06	3.70513e+06	5.51515e+06	1.49157e+06	1.40075e+06	3.59354e+06	3.53734e+06	1.33351e+06
Q14764	MVP	2.69387e+06	4.35215e+06		397178	1.5647e+06	1.11281e+06	2.70513e+06	1.181e+06	588917	3.38705e+06	5.1464e+06	1.46796e+06
O43491	EPB41L2	2668441	1319878	1.31741e+06	1.90492e+06	772836		755115		289153		859872	225634
Q14677	CLINT1	2.64422e+06	7.15352e+06	3.25033e+06	3.53196e+06	2.55161e+06	881784	3.65462e+06	1.05805e+06	961979	2.14818e+06	1.97383e+06	5.90834e+06
Q96C19	EFHD2	2.56134e+06	3.63755e+06	1.2904e+06	2.4591e+06	3.84936e+06	91154.5	7.02211e+06	5.56748e+06	3.03174e+06	6.41165e+06	5.66223e+06	3.16799e+06
O95433	AHSA1	2.52631e+06	4.50073e+06	703787	208894	2.62287e+06	126088	560622	2.56066e+06	1.58537e+06	1.00373e+06	1.34518e+06	2.34079e+06
P07814	EPRS1	2.50738e+06	2.20721e+06	276496		1.92012e+06	528281	2.19329e+06	1.81023e+06	1.49166e+06	5.27136e+06	3.88097e+06
P31949	S100A11	2.47291e+06	6.24711e+06	3.02381e+06	3.17154e+06	2.4718e+06	917718	3.3664e+06	1.67601e+06	2.03876e+06	5.84252e+06	5.87395e+06	2.99244e+06
Q14258	TRIM25	2.43136e+06	2.78722e+06	1.68722e+06	1.65499e+06		1.14359e+06	1.63978e+06	4.53778e+06	2.73983e+06	4.63052e+06	2.03097e+06	1728466
Q8NI36	WDR36	2.40953e+06						2.90333e+06	1.01279e+06
P17096	HMGA1	2.39827e+06	2.44576e+06		984967		1.05439e+06	5.20312e+06	3.98697e+06	2.28727e+06	1.43524e+07		4.85284e+06
Q9H0L4	CSTF2T	2.35201e+06	1.23992e+06	1.77598e+06	969718	1.45354e+06	1.19867e+06	3.07744e+06	2885625	2.14565e+06	2394057	1.78629e+06	1.2434e+06
O15143	ARPC1B	2.308e+06	1.27109e+07
Q9UG63	ABCF2	2.29339e+06	6.10276e+06		3.47081e+06	1.82107e+06	266992	4.56986e+06	1.36945e+06	1.24195e+06	1.01688e+06		4.31791e+06
P27694	RPA1	2.24343e+06	4.52666e+06	1493976	1.78816e+06	2.30994e+06	939034	3.05256e+06	1139040	1.17858e+06	5.87273e+06	4.39712e+06	2.13996e+06
Q68CP9	ARID2	2.23931e+06				2.00039e+06			1.56899e+06
Q32MZ4	LRRFIP1	2.19434e+06	2.61512e+06	2.78717e+06	1.9545e+06	2.58626e+06	2.26848e+06	2.90862e+06	2.70762e+06	1.89973e+06	2.28338e+06	2.46763e+06	1.36629e+06
Q5TEC6	H3-7	2.18978e+06	165747	618900	683407	1.79157e+06	451429	2.97984e+06	1.50751e+06		9.7802e+06	7.68108e+06	1.03106e+06
Q8IVF2	AHNAK2	2.16087e+06	3.19689e+06	135207	2.30666e+06	2.60364e+06	779404	2.4069e+07	1.59615e+07	8.88662e+06	1.60908e+07	1.1778e+07	3.92603e+06
P48556	PSMD8	2.15851e+06	4.28567e+06	3.24051e+06	4.37331e+06	2.75281e+06	1.23925e+06	5.10955e+06	3.25108e+06	2.54745e+06	4.33104e+06	4.00505e+06	3.44373e+06
Q14498	RBM39	2.15671e+06	1.06532e+07	5.53272e+06				3.34376e+06	1.85026e+06			3.7529e+06
Q5K651	SAMD9	2.14562e+06	2.81952e+06	191514	1692990	1.23019e+06	487248		1.01361e+06	557578
Q9UHB7	AFF4	2.14127e+06	1.31261e+06		930998	1.62273e+06	778348	1.08721e+06	1.44628e+06	530332	800256	907911
Q96N67	DOCK7	2.12554e+06	3.39871e+06		3.48197e+06	1.12497e+06		2.71155e+06	790172	643241			2497551
Q12792	TWF1	2.11823e+06		3.58446e+06	4.16133e+06	2699117	215137	4.16643e+06	1.23786e+06	1.26083e+06	3.85725e+06	2.80918e+06	8.98061e+06
P15822	HIVEP1	2.11655e+06			1.76312e+06	1534886	921928	3919267	4.80847e+06	2.37476e+06	3.59513e+06	2636886
Q16881	TXNRD1	2.09309e+06	2.6252e+06		995215	1.72853e+06	583011	2.37818e+06	1.27287e+06	1.02586e+06	6.94393e+06	6.36778e+06	1.38837e+06
P52597	HNRNPF	2.04976e+06	1.90246e+06	702974	811135	2.76947e+06	372737	4.30832e+06	1.68897e+06	1.71727e+06	7741888	7.28148e+06	6.92622e+06
Q13185	CBX3	2.00426e+06	3.33763e+06		4.50225e+06			2.56567e+06	1.37272e+06
Q9H5V9	STEEP1	1.98903e+06	1.74842e+06	381976	1.70266e+06	1.2917e+06		3.84349e+06	3.34981e+06	1314488	3.94541e+06	2.30544e+06	1.35023e+06
Q9UHD1	CHORDC1	1.91219e+06			1.20826e+06	1.35362e+06	888195	2.29532e+06	1.58896e+06	971657	1.42145e+06
Q14008	CKAP5	1.89558e+06	5.93613e+06	660279	2.51696e+06	3.58483e+06	968240	5.98837e+06	5.17178e+06	1.92407e+06	2.9054e+06	1.69799e+06	3.85511e+06
Q9Y2X3	NOP58	1.83626e+06	8.3812e+06	4.07927e+06	4.78731e+06	2.88464e+06	1288424	1226280	926700	702806
Q96HC4	PDLIM5	1.82209e+06	4.17898e+06	2.11646e+06	3.04811e+06	4.06574e+06	887201	6.53452e+06	4.19902e+06	3.08944e+06	5.83575e+06	4.04598e+06	3.47514e+06
Q9UPQ0	LIMCH1	1.79885e+06	983973	1444374	1.94809e+06	1.46461e+06	831125	235615	163212
P0C0S5	H2AZ1	1.78891e+06		1.0376e+06	754192	1.00633e+06	7.38077e+07	3.75752e+06	2.10376e+06	1.38536e+06	6742638	7870117	1.97945e+06
Q9UDY2	TJP2	1773888	1.87955e+06	1.28346e+06	2.00026e+06	1.98765e+06	688382	6.41997e+06	4.79085e+06	3.62164e+06	2.91504e+06	1.01871e+06	3.32905e+06
P22392	NME2	1.7653e+06	2.61726e+07		11001794	1.5493e+07	7.91259e+06	5.77701e+06	1.05829e+07	8.99496e+06	5.08423e+07	1.15665e+07	2.38603e+06
P23763	VAMP1	1.75712e+06	1.73979e+06	1.48323e+06	1675305	2.5022e+06	1.09577e+06	3.20211e+06	2674889	1.72606e+06		2.78443e+06	1.18372e+06
Q92945	KHSRP	1.75528e+06	2.64599e+06	1.1308e+06	1.14315e+06	1.87444e+06	80891.4	2.99153e+06	543050	535233	1.00965e+07	8.93011e+06	1.15093e+06
P31948	STIP1	1.74474e+06	3.49817e+06			2.63238e+06		9.73512e+06	1.93522e+06	821149	1.55581e+07	1.3181e+07	2.79315e+06
P06454	PTMA	1.7265e+06		183480		1.20154e+06	345719	2.3399e+06	1.32616e+06		6.98579e+06
Q12959	DLG1	1.71328e+06	2.16062e+06		1.77217e+06	2.26394e+06	1.04102e+06	1.21549e+06	997767	753751	1.00805e+06	912760	547116
P16949	STMN1	1.68878e+06	637305	898026	897164	1.17988e+06	481166	5.35822e+06	3.98893e+06	5.42364e+06	6.60331e+06	6.83442e+06	1.67025e+06
P55081	MFAP1	1678862	1.7345e+06	1.36845e+06	1.58294e+06	1872646	753078	1.28723e+06	1.16115e+06	741356	1.09209e+06	1.06766e+06	518126
Q8WWM7	ATXN2L	1.67494e+06	3.01866e+06	1.64253e+06	1.65328e+06	1976449	357353	2.01536e+06	1.74049e+06	906522	2.2749e+06	2.41179e+06	1.32997e+06
O00151	PDLIM1	1.65193e+06	972597		796513	1.97473e+06	305622	2.43313e+06	2.3052e+06	1.06532e+06	1.79673e+06	1.48927e+06	429322
O60443	GSDME	1.64211e+06	1.68135e+06	1.24781e+06	1.33772e+06	1.95708e+06	869358	3.14266e+06	2.55481e+06	1.70207e+06	2.55389e+06	1.73074e+06	1.38295e+06
Q9BTC0	DIDO1	1.59418e+06			1.35987e+06	1.4182e+06		1.20734e+06	2.05074e+06	1.45767e+06	2.00269e+06	2.21594e+06	774712
O43639	NCK2	1.58711e+06		1.44681e+06		1.90995e+06	938617	1.77792e+06	1.18379e+06	939613		787062	473055
O75179	ANKRD17	1.58674e+06	1.52654e+06	1.01914e+06	1.36132e+06	1.40815e+06	615904	1.58373e+06	1.08299e+06	621377	1.45557e+06	1.09618e+06	646225
Q9HB71	CACYBP	1.57591e+06	4.61549e+06	2.0769e+06	3.15145e+06	1.58111e+06	619970	1112701	1.21723e+06	440645	5.44685e+06	2.73036e+06	282599
Q8TA86	RP9	1.54986e+06	1.17481e+06	808728	842175	1.11043e+06		2.27939e+06	2.01888e+06	1.16665e+06	1847620	1.8758e+06	1.1878e+06
P13984	GTF2F2	1.54749e+06	1.12246e+06	460555		1.37969e+06	615309	1.96067e+06	1.331e+06	965477	1.68104e+06	1.04837e+06	696571
O75534	CSDE1	1.51955e+06	3.01953e+06	2.8204e+06			74546.9	500664	478461	414134	1.39054e+06	462169	557103
P20290	BTF3	1.49396e+06						1.18664e+06	503610		5.44921e+06	3.66732e+06	929177
P50851	LRBA	1.48774e+06	1.38276e+06	1.2303e+06	1.43242e+06	1.65839e+06	767276	2.17321e+06	1.99909e+06	1.29594e+06	1.85575e+06	1.93444e+06	904578
P31946	YWHAB	1.43558e+06	953780	839134	245745	1.33931e+06	437077	1.54159e+06	1.11855e+06	451666	3.37872e+06	2.16536e+06	439074
O15144	ARPC2	1.42175e+06	3.03697e+06	2.07518e+06	1.38276e+06	1.58176e+06	744646	885952			3.73772e+06	3.29309e+06	339126
P23588	EIF4B	1.38604e+06	1.36555e+06	761248	1.11536e+06	1.38038e+06	523732	1.0738e+06	128044	239068	3.30742e+06	2.11915e+06	322321
Q8NFC6	BOD1L1	1.36167e+06		455049	713243	685243		1269145	1.02753e+06	4.18618e+06	2.54848e+06	898363	16155598
Q15555	MAPRE2	1.33373e+06			1.04465e+06	1.09361e+06		2.12139e+06	1.6574e+06	1.21382e+06	1.82284e+06
P0DMV9	HSPA1B	1.32325e+06	4.65968e+06	1.2091e+06	1.1162e+06	1.60144e+06	596255	4.58825e+06	416162	678244	1.18062e+07	8.18736e+06	1.45217e+06
Q5T8P6	RBM26	1.32056e+06			1.11906e+06	1.29144e+06	510846	1.37994e+06	1.07308e+06			975355
Q9ULV4	CORO1C	1.29196e+06	2.29011e+06	1.16195e+06	1.64556e+06	917121	921439	2.9895e+06	2.53445e+06	2.30668e+06
Q9C0D5	TANC1	1.29146e+06	1.53891e+06	496994	1.18055e+06	1.34859e+06	519662	2.71942e+06	1.91023e+06	1.23672e+06	1.5892e+06	930917	1.02435e+06
O95292	VAPB	1.29105e+06	665057	486383	2.19832e+06	2.15666e+06	766673	4.66232e+06	2.12887e+06	1.82579e+06	2.84537e+06	2.85422e+06	990237
O75909	CCNK	1.2703e+06	887406		2.1747e+06	1.39649e+06		756252	710100	406459		934922	936067
Q9UIG0	BAZ1B	1.26139e+06		3.20363e+06	2.9301e+06		673765	1.67499e+06		1.0174e+06	2.32703e+06
Q9UHD8	SEPTIN9	1.25805e+06	834686	591666	1.3467e+06	1.116e+06	404018	2.14279e+06	1.20237e+06	1.15891e+06	5.1226e+06	1.99715e+06	1.28431e+06
P41227	NAA10	1.25236e+06	4.8988e+06	2.89615e+06	2.00439e+06	1.77195e+06	670059		472684		1.50272e+06	792293
Q9P2E9	RRBP1	1.2483e+06				1.21756e+06		2.44584e+06	718604				1.17921e+06
Q9UQR0	SCML2	1.24307e+06			417900	972784		1.15293e+06	1.03073e+06	271952
Q8TF01	PNISR	1.23706e+06	1.25233e+06	950512	1.02855e+06	1224311	548286	1.17982e+06	1.18484e+06	622554	1.20322e+06	1.14894e+06	566780
Q14157	UBAP2L	1.2361e+06			1.24559e+06	990866	463404	2.17631e+06	97456.6			1.36405e+06	77062.8
Q9P2F8	SIPA1L2	1.23501e+06	2.14878e+06	1.06331e+06	1.52153e+06			2381693	266722	388318	640221	1.20391e+06	2.34398e+06
Q9Y217	MTMR6	1222341				1.36006e+06
Q9NP73	ALG13	1216205			758354			928032	755950
Q9P2N5	RBM27	1.21477e+06				982542
Q13620	CUL4B	1.19679e+06	2.7263e+06	1.81503e+06	261417	974319	198040	1.3098e+06	592996		1.19042e+06	365712	1.26719e+06
P46939	UTRN	1.18427e+06	825052	483763	856217	693090	478952	2.1984e+06	1.72977e+06	1.0639e+06	1.45396e+06	936244	597267
P06753	TPM3	1.17294e+06	848686			978853		536078	693408		7.49383e+06	3.83655e+06	213380
Q96KR1	ZFR	1.12931e+06	1.07251e+06	934603	1.03942e+06	1.15569e+06	234298	1.03469e+06	919933	440661	1.89169e+06	1.28376e+06	424799
Q63HN8	RNF213	1.12153e+06	1.7305e+06	525951	857642	800848	528630			1223966	427540		463269
Q6WCQ1	MPRIP	1.11478e+06						2.86948e+06	820900	292913
Q5HYI8	RABL3	1.08778e+06	3.82316e+06	1161758	1.33536e+06	527970	418619	837759	684154	666241	925939	1.68552e+06	1.97335e+06
Q15020	SART3	1.07369e+06				1.07268e+06		1.06317e+06	724215				55327.7
Q07157	TJP1	1.05728e+06	682161	294567	979677	961940		3.48605e+06	3.68302e+06	876058	980181	953618	576896
P06703	S100A6	1.02722e+06	240634	345403	265293	1.38259e+06	546214	1.93671e+06	4.06156e+06	1.72016e+06	4.79086e+06	4.9324e+06	773582
Q9H501	ESF1	1.02427e+06		550776	995831	1.13694e+06	531103	1.32709e+06	948146	796834	1.05327e+06		594990
O75864	PPP1R37	1.02198e+06	1124048	140797	942711	1.31505e+06	530773		550883		1172544	757390	575755
P06730	EIF4E	1.01953e+06	5.45743e+06	2.42964e+06	1.29311e+06	91734.2	305336	1.11711e+06	260195	405037	242375	1.35547e+06
Q6XZF7	DNMBP	1.01325e+06	612751	704257	783195	709782	536936	2.32386e+06	1.54784e+06	906431	1.75766e+06	1.15657e+06	748890
Q9ULU4	ZMYND8	1.01282e+06	1.15847e+06	816736	1.17144e+06	1.23884e+06	560872	1.23717e+06	1.28401e+06	693926	1.10283e+06	1.32274e+06	668623
O14531	DPYSL4	1.00856e+06	1.03486e+06	657445	1.10449e+06	1.33067e+06	122890	4.49038e+06	2.91285e+06	1.60978e+06			162246
P13797	PLS3	998903	4.96098e+06	2.28834e+06	1.10698e+06	863985	504826	1.09375e+06	323868	128514	1.21396e+06	880725	2.51492e+06
Q14847	LASP1	998511	87692.9	485709		886326	509554	1.93803e+06	1.22014e+06	793655	3.50662e+06	2.41579e+06	541404
Q9C099	LRRCC1	976446
Q15545	TAF7	964239	1.36369e+06	868174	1.32349e+06	1.21015e+06	552840	3.52328e+06	1.64803e+06	1596788	2.85455e+06	1.96995e+06	1.2945e+06
Q96EV2	RBM33	959101			637843	591560	274452	513097	284012		460211		230484
O14964	HGS	946085	6.47818e+06		3.60562e+06		114496	1.39253e+06	281766	465858	2453756	1.87422e+06	5637761
Q01105	SET	935267	513616									1.3846e+06
Q14C86	GAPVD1	924636	1.29334e+06	717023	1.11994e+06	1.52552e+06		1.82121e+06	1.34649e+06	794032
Q15424	SAFB	923848	1.21184e+06	1.03875e+06	1.00833e+06	1.77238e+06	797349	1.69836e+06	441277		4.51755e+06	1.86018e+06	742906
Q8IVD9	NUDCD3	920461	473393		791761	691498
P24534	EEF1B2	914204	1.62514e+06		918408		108669	3.38579e+06	1.50743e+06	1.9924e+06	7.25496e+06	2.75526e+06
A1X283	SH3PXD2B	911339	980833		1.19391e+06	850575		1.5645e+06	1036888	1.28156e+06	747873	663218	684122
Q13428	TCOF1	910243	1.69798e+06	1041695	1.08115e+06	1.57276e+06	487659	2.26223e+06	517032		7.72112e+06	3.92167e+06
Q9Y570	PPME1	909668	722097			1.03763e+06	444376	1.77516e+06	1.5006e+06	745846	1.23944e+06	1.06495e+06	399244
Q9H2P0	ADNP	908274	2.27595e+06	953955			247932	1.12114e+06	527573			1376514	2.52796e+06
Q86UE4	MTDH	901481			156389	122215	53641.6	548064	661274	418703	3.3032e+06	748518	210698
O43795	MYO1B	874509	4.35757e+06		2.19917e+06	421071	85017.6	941376	576452			3.52256e+06	5.0475e+06
P21675	TAF1	866566	739528	748839	824126	1.00042e+06	450020	2.08281e+06	2.216e+06	1.07626e+06	1.8966e+06	2.18124e+06	806716
Q14739	LBR	862124	8.34556e+06		1.77052e+06	1.92442e+06	1.00121e+06	1.74793e+06			2.89653e+06	2.61713e+06
Q01813	PFKP	861782	2.12426e+06	1.08397e+06	693068	589006	415464	1.49213e+06	694594	76316.3	4.23951e+06	3.76457e+06	578293
O15155	BET1	861436		576304	1.68226e+06	1129908		2.20353e+06	1.42911e+06	1.16465e+06	2.15461e+06	1.21115e+06	1.4598e+06
Q9H6Z4	RANBP3	858788	367207		602037	1.83821e+06	340927	868422	693962	445077	898487	320689	298136
P40763	STAT3	856340	757512	383606	765153	895496	376008	3.24965e+06	1.19979e+06	836185	2.63682e+06	1.39254e+06	536829
Q9H1E3	NUCKS1	850792	1.34992e+06	1.6022e+06	1.29629e+06	2.23467e+06	1.01691e+06	1.30627e+06	1.54958e+06	1.12504e+06	4.65798e+06	2.70718e+06	1.58511e+06
P42167	TMPO	842983	1.00933e+06	847734	1.9025e+06	2.08112e+06	3.01867e+06	1.27568e+06	6.86602e+06	5.21511e+06	1.82517e+06	1.50986e+06	229584
P19532	TFE3	842149	597333	373542	712750	879866		3.50083e+06	2.56354e+06	1400954	2.8183e+06	1.95412e+06	1.15625e+06
Q7Z2W4	ZC3HAV1	804620	2.59495e+06	864408	1.85228e+06	654701	529414	1.02415e+06			635274
Q9H3U1	UNC45A	803036	896312	661306	296002	1.12165e+06		287498		404097	300063		62284.7
P22234	PAICS	797908	3.15651e+06			1.28588e+06		1.14272e+06	211609	81936.5	3.68866e+06
Q96NC0	ZMAT2	793302	659076	612018	743126	760100	408940	1.48807e+06	1.3181e+06	780333	1.26044e+06	1.16479e+06	571124
Q99733	NAP1L4	784467	833910	613640	815074	1.11225e+06	399023	350697	554621	2.35232e+06	2.18041e+06	1.79528e+06	635294
Q13596	SNX1	784069			1.28461e+06	2.8147e+06	786558	2.14336e+06	1497294	1373910	1.87689e+06	1.20497e+06
P29353	SHC1	782064	1.08911e+06	529556	1002274	772673	434084	1.67184e+06			1.51609e+06	908667	921231
Q9NYF8	BCLAF1	769607	3.37826e+06	2.20542e+06	3.15585e+06	2.55588e+06	627163	4.66729e+06	2.38466e+06	1.3517e+06	7.66936e+06	5.88611e+06	4.32417e+06
Q92625	ANKS1A	764825	1.11605e+06	744344	668577	906069	461036	1.02152e+06	690218		749241	558352
P53355	DAPK1	759299
Q16674	MIA	742771			860856	641898	402902	1.38829e+06		950017			700856
Q9UKX3	MYH13	732880	424481				279961	8547778
Q9P0L0	VAPA	728287	599374	232598	181009	908988	316994	5.46383e+06	2.21637e+06	1.22773e+06	6.5229e+06	5.3767e+06	1.57496e+06
O43395	PRPF3	726074			589402	2.67953e+06	1.56175e+06	3.37607e+06	493731	1.09778e+06	674133	1.67493e+06	2.30536e+06
Q9P2D1	CHD7	723655						916001	538762	186015	697050		113957
Q5SW79	CEP170	723075	264212	295251	1.24588e+06	171107	628356	1.89061e+06	1.51072e+06	550996	721964	413565	559678
Q7Z417	NUFIP2	722344	803885	609933	683867	655016	167970	178485	467557	183870		186752	157645
Q9BXF6	RAB11FIP5	719126	2.13856e+06	1.08363e+06	1.78214e+06	1.18801e+06	205891	876264	1.32576e+06	578543	465603	643767	1.19317e+06
Q8NFD5	ARID1B	699501			706926	712246	364071
O75683	SURF6	688991	771079	724384	879057	669411	345345
Q14978	NOLC1	685262	1.12381e+06			881285
Q9UKK9	NUDT5	680856	767222		961235	1.23404e+06		1.05446e+06	727499		1.23651e+06
Q99439	CNN2	678530				787131	71828.2	197624	586281	240434
Q8WWI1	LMO7	671383	5.17793e+06			835242		1.0643e+06	1.04837e+06	139652
P18615	NELFE	669584				661129			425608	428005			283321
O95817	BAG3	664908	238256	102198	750415	1.05301e+06	441660	2.14033e+06	1.34892e+06	989204	1.44225e+06	691016	510585
Q9BRZ2	TRIM56	660712			210995			837632		1.00921e+06		1.94197e+06
Q96Q89	KIF20B	657522				609287	142329	3.2975e+06	1.98203e+06	1.67219e+06	1.67855e+06	2.60763e+06	809592
Q8WXF1	PSPC1	656524	963607	710771	1.01353e+06	1.07796e+06	464212	216963	154765	760592	837593		555756
O94888	UBXN7	645327
Q9UKV3	ACIN1	636316	1.46047e+06	438781	657498	534583	192916	516321	1.15115e+06	565240	1.79635e+06	1133590	1.46975e+06
P28347	TEAD1	630474	182522		448446	281148		803389	896243	338054	515539		913549
Q8N511	VMA12	612438	587652	428621	696903	693907	302552	2.67117e+06	1.80382e+06	945865		1.58394e+06	685287
Q8WXI9	GATAD2B	609966	630799		465513	786660		793298	546938	423448	530255	643063
Q9NR12	PDLIM7	598613		944229	1.15835e+06	470654	192039	1.35328e+06	596417	508965	1.73151e+06	711722
P05783	KRT18	597913			203047	275263			293613	145804	381664	699790	177115
Q9UMN6	KMT2B	594892							626279	413124
Q16204	CCDC6	593053	642834	512525	664762	644679	358861			312661
O43290	SART1	572446	563418		701374	585219		54083.5		430284		174187
P11171	EPB41	566347		482598	608680	667411	527854	1.60082e+06	1.42031e+06			1.2718e+06	211519
Q9UJX2	CDC23	565686				827118	202225	648365
Q15652	JMJD1C	561942			317948	446627	175299	733482	1.02715e+06	498481	607062
Q9Y520	PRRC2C	559060	679270	365475	271227	212551		1.02672e+06	1.71248e+06	448226	986374	1.09265e+06	388931
Q6PKG0	LARP1	550317	736180	473157	311621	1.30266e+06	199351	1.62132e+06	815309	233756	1.4959e+06	660870	1.20232e+06
Q8WUQ7	CACTIN	542984	443899	266291	484035	490598	234418	829429	1.09287e+06	333854	731907	1.41078e+06	999618
Q8NBF2	NHLRC2	540421	692628		590181	549007		1.10636e+06	1.01933e+06		1.77772e+06	659744	527514
Q9NYM9	BET1L	533557			399098	720339	249427	806587	601544	393508	561598	579465
Q96EB1	ELP4	523469				963641			533699
Q8IWR0	ZC3H7A	508297	436077	407784	391486	580633	270128	796481	642040	400397		630200	302468
Q9UPN3	MACF1	507136						1.89774e+06	1.97938e+06	1.19919e+06	1.35388e+06	818862	713273
Q15459	SF3A1	503105	3.46301e+06	396623	243102	752786	165770	2.02858e+06	1.20437e+06	876388	4.56453e+06	3.60598e+06	3.27974e+06
P35658	NUP214	492655			426524	655497		1488993	1.17657e+06	234861	1.4442e+06	1.06482e+06	1.18088e+06
Q9H2U1	DHX36	490398			1.35731e+06	942330		521248	327837	420872		760401	1.66816e+06
Q9UJU6	DBNL	486870	672984		832291	1.76781e+06	698103	2.86479e+06	2.85471e+06	2.0729e+06	1.58192e+06	917054	343809
Q7Z2K8	GPRIN1	486465				315580	86024		268064		380856
Q96QC0	PPP1R10	481796				1.05952e+06	570525	2.52101e+06	906098	1.25796e+06	2.36062e+06	1184634	410773
Q92575	UBXN4	479330	545586	395699	528708		258338		552115
Q9NRY4	ARHGAP35	476516	1.29865e+06	240574	601225	661308		181171		197973
Q99961	SH3GL1	471375	364949	760512		880477	437296	997809	558749	290968	961141	1.02037e+06
Q96AT1	KIAA1143	468351				446447		1.08671e+06
O15498	YKT6	465583						187097	485515		1.66175e+06	830460
Q9UKY7	CDV3	458587	213808	107273		392868		1.68452e+06	1.69123e+06	786959	1.74303e+06	955587
O14976	GAK	456529	330406	384479	626786	374849	351882	458017	465677	105230
Q9Y5V3	MAGED1	455330	493592		516264		265076	395087	303874	213348			181102
Q13823	GNL2	453130	3.57283e+06			1.29134e+06					508051		4.92739e+06
Q9ULW0	TPX2	452954	791590	868039	1.29912e+06	1.09111e+06	338520	1.4128e+06		706021		957313
Q5HYK7	SH3D19	452028				402880	337051	936838	741996	678966	915858
P48634	PRRC2A	446996	616669	376872	428947	844107	338108	929821	707253	465374	1.05677e+06	374292	210269
Q9NW82	WDR70	443877				534930	248909				548716
O95210	STBD1	442630	844906	446238	889506	831767	254353	570890	380747	318455	420980	436202	267148
Q5T5Y3	CAMSAP1	438814	462406	331377	483452	682772	184315	951103
P51397	DAP	429376	370703	198288	392346	406572	200584	1.76171e+06	390900	1.09468e+06	680210	598645	138990
Q96D71	REPS1	427993	333943	222582	363537		182304	544140	438788	322712	476654	267330	293898
Q9H425	C1orf198	420957	507585	398536		472448	267933	379299	256757	186960	292120	206112
P78559	MAP1A	417696				258736	372836	2.49175e+06	2.16309e+06	1.10076e+06	1.34606e+06	382145	479686
Q2M2I8	AAK1	414010	757380	743478	475761	830309	679325	1.8478e+06	1.29988e+06	919103	1.40597e+06	743903	316242
Q5VWQ0	RSBN1	411836
Q9H8U3	ZFAND3	400919		413582		479045
Q9HB21	PLEKHA1	400453	505612	303101		493331	219098	887479	570399		558875	657587	396672
P86790	CCZ1B	400386				437705	215537	1.21789e+06	636902	510631	919951	530014	319229
P23497	SP100	397964	444569	419597	485050		284240		503205	258175			763309
Q8WW12	PCNP	395509	1.53978e+06	789366	1.73586e+06	1.48637e+06	505371	2.36325e+06	696413	1.02453e+06	1.48753e+06	842485	770893
P21291	CSRP1	392149	664182		302240	139113	521145	2.104e+06	611043	1.06261e+06	2.72246e+06	2.49193e+06	532538
Q9H2G2	SLK	385054				363799			399584
Q9H8H0	NOL11	385024	8.22364e+06	2.41613e+06	2.49253e+06	1.05787e+06	727615	1891235	353073	1.02166e+06	1.6072e+06	2.20293e+06	6.20178e+06
Q96PZ0	PUS7	377863	2.75238e+06	923103	918083	286625		506442	536290	289467	391112	457045	1.45274e+06
Q9Y6I3	EPN1	366710
Q9Y618	NCOR2	362267				264828	757980	417990		181769
P35998	PSMC2	357901						282987			3.35019e+06
Q99700	ATXN2	354132	295868	216095	333428	475700	137120	711478					249256
O15014	ZNF609	353190	446858	330670	414333	615882	211564
P35789	ZNF93	352630			321534	293402		363342	320777	154212		412117
Q14126	DSG2	346892				291674		1.97184e+06	2.20933e+06	2.23711e+06	1.57571e+06	1.76302e+06	531912
Q86WB0	ZC3HC1	345176	4.96515e+06	2.48479e+06	1.42522e+06	1.77221e+06	498549	1.27325e+06	772267
Q9H0E3	SAP130	343253				288078	130771	675831	587432	379650	428226	301674	244925
O75886	STAM2	342347				465808
Q5VZ89	DENND4C	341500				368234				146929
Q93052	LPP	328698				314571	190418
Q9Y4E8	USP15	323000	2.03047e+06		865913	316920			188657		317271		892516
Q9NWH9	SLTM	320694	222732			313239	169207	319361	384560	208056			63660.5
O95219	SNX4	316291				358479		1.30437e+06	1.17353e+06	644562	1111603		481198
P61081	UBE2M	316143	701348	173862		469341	230456	524373	438880	211176	1.2034e+06
P13489	RNH1	311782
Q13206	DDX10	305982						662735		379467
Q9NWB6	ARGLU1	304558		230301	381632	127368	155211	163557			636758
O43314	PPIP5K2	296430			305507	510195	244542		278318	291423
O75381	PEX14	294584			394758	415672	194079
Q9C0B5	ZDHHC5	293163							323912
P11717	IGF2R	292270						785367	502626	602000	738731	863103	1.21757e+06
Q9BZF1	OSBPL8	283194	3.01614e+06		297308	723059	142979	1.81424e+06	1.00187e+06	511249	1.42809e+06	1.57613e+06	4.13875e+06
Q9NZZ3	CHMP5	283029	243556	286449	290162	545789	424310	2.79573e+06	1.78956e+06	404871	1.27886e+06	628176	765144
Q15042	RAB3GAP1	277470				293964	139621	1.3418e+06	316492	235940
Q9Y2D5	PALM2AKAP2	273498	536681	746891	756875	965005	499972	7.51297e+06	4.98359e+06	3.57746e+06	7.02685e+06	3.91557e+06	3.37505e+06
Q00688	FKBP3	266296	201760					377849		198876	308423		74556.2
Q8NI27	THOC2	266194	781187	675276	185780	271566	81761.4			531672		1.1022e+06	1.19761e+06
Q8N8S7	ENAH	266098	478373		285763			368465		155449	762700		126520
P46821	MAP1B	246309				281136		1.81867e+06	1.48102e+06	1.12523e+06	1.05091e+06	408928	40784.3
Q92890	UFD1	237819						556412	388533	285314	493176		226143
Q9H987	SYNPO2L	235008		236141	264647	414547	141972	443909	349765		368897
Q9H814	PHAX	234502						371528
P43487	RANBP1	231306				184797		271649	170531			617075
O75787	ATP6AP2	230513	593930	245425	295760	277469	130909	198611					91067.1
Q9Y2H0	DLGAP4	225679	197913	168545		163398	105829	525593	513567		338435	294570
P06396	GSN	225320	542670			921839		716860		149979	361863
O94986	CEP152	224630		180273		200888	106265	239083	192094	123966			113132
Q8NDI1	EHBP1	223314			251064	266310	151015	467557	393981	229153
P16591	FER	222259				336821	133082		334362	168403	406933	272603
Q9UNZ2	NSFL1C	216740		135347	158712				177725	113795
P46060	RANGAP1	211554	899246	163350	1.18042e+06	1.38522e+06	528603	3.46659e+06	1.96128e+06	1.47782e+06	5.0996e+06	1.67713e+06	1.01595e+06
O43432	EIF4G3	209142	336891		235138	805316	319072	651113	564511	189366			136309
Q96CT7	CCDC124	208135	273120	207792	255976	229771	150628	736013	421514	257494	771544	590704	228599
A8MTY0	ZNF724	205018
Q8IYD1	GSPT2	201006	1.10561e+06		173003	221876	139566	5.42784e+06	191272	2.1172e+06	5.04657e+06	569046	109687
Q96C92	ENTR1	199428
Q14669	TRIP12	198861						487532
Q96ST2	IWS1	197998						524470	314324	198776	459618	308460
Q13129	RLF	195878	206994	179485	229567	243801	105283	266837	202516
Q9Y2S6	TMA7	191904	272053	191182	285335	261323	211364	347938	298009	240908		201725	155322
Q9ULE4	FAM184B	187092		184975	245716
Q9NS87	KIF15	184588						290806		168481
Q9BPX3	NCAPG	183705	2.73081e+06	791899	374500			177269		415995	633057		3.48698e+06
Q6NYC8	PPP1R18	183645		117984	173015	172696	78312.5	434826	255595		607163	247408	178342
P24928	POLR2A	175915								657627
Q8TBX8	PIP4K2C	175878	957894	972718	213403	235173	550895	1.97492e+06	1.3846e+06	1.57593e+06	941185	958261	996261
Q96A33	CCDC47	174421			1.71191e+06	719448					2.2414e+06		637353
O76094	SRP72	169416						579843	541370	448525	771613	701344	324011
Q9BWH6	RPAP1	166884				120309	82867.4	128230
P20962	PTMS	160694					144104	343880
Q96T51	RUFY1	160692	1.70059e+06	539164	611249		459152	2.11194e+06		738845	871270	503282	359672
Q15050	RRS1	159263			139043	325805	91368.7	132930
Q96I25	RBM17	156683	144812			493798	64020		117093	108289
Q6IN85	PPP4R3A	155807	191070		187251		78182.4
Q3MHD2	LSM12	151703				158112		216526	191433			139122
Q2TAL8	QRICH1	142453
Q9UQ35	SRRM2	115794			1.78702e+06	1.29394e+06		271884		491030
Q00341	HDLBP	113472	553797
Q06546	GABPA	104264	133039		142377								82376.5
Q8IVM0	CCDC50	80348.4				83946.9	55134.2	91997.6	66730.8
O95218	ZRANB2	74322	472535	502141	489168	1.04337e+06	662953	662970	1.69496e+06	944586	1.74079e+06	944834	375292
Q13813	SPTAN1	72976				186642		221579	277650		9.80434e+06	3.73005e+06	820121
P50402	EMD	21166.2	1.3282e+06		745933	262049		1.77396e+06	596372	330301	2.90792e+06	2.07608e+06	742042
Q08379	GOLGA2
Q8IWZ8	SUGP1		792307	983543		836534	427004		1.32231e+06	816837	1335236	1.05478e+06	944825
Q6VMQ6	ATF7IP							502465	308970	213832	350993	330818	187995
Q8IUD2	ERC1							3.08521e+06	2.68709e+06	1.67822e+06	2.37518e+06	1.09929e+06	1.02081e+06
P51003	PAPOLA
Q13177	PAK2		1.16201e+06	840097	436409	1.33406e+06	414521	614099		375412	167462
P49750	YLPM1		326227	165460		233281	127694				82768.8
Q9GZT9	EGLN1			113096				215363	157190
Q5GLZ8	HERC4		1.42306e+06	652751	718604	311966		790132		168934	610221	691200
Q9Y2H2	INPP5F							1.99061e+06	1.36068e+06	924587	1.67935e+06	1.03093e+06	705637
Q9BSJ8	ESYT1			375952				513876		76404.4	1.1485e+06		1.22182e+06
O75937	DNAJC8		94973.4					802255	164452
Q9UMZ2	SYNRG
P35442	THBS2		199146
O15541	RNF113A
Q6ZUT1	NKAPD1					299918		405900	442371	245704
Q13330	MTA1		658869	505780	667546	687200	323393		315799	237630
Q658Y4	FAM91A1					570893			551936		573818
Q9H098	FAM107B					264230		750485	1.06705e+06	221341	757568		165657
A6NP11	ZNF716
Q9P270	SLAIN2							1.28523e+06	694244	362071	947939	609347	267209
Q2YD98	UVSSA		245138	185538	247495			641240
Q53ET0	CRTC2			143019	139924
Q9NRA8	EIF4ENIF1							488617
Q96NB3	ZNF830		314235				154400
Q15003	NCAPH		365245		395295		211233		427030	191076	848936	459334	136375
O15042	U2SURP		1.98041e+06		716215	429082	518353	921859	290950	543712	2.71555e+06	175038	167807
P41223	BUD31						109236			153852			110203
P49959	MRE11					321760
Q8ND56	LSM14A		83069.2			130324		259016	104465
O95819	MAP4K4					482363		136750	323868
P27540	ARNT							251290
Q9ULM3	YEATS2
P42226	STAT6		180279	90622.5		234752			145687				86329.3
P18583	SON					102549	253375	810532	628261		483554	1.06407e+06	871275
Q05209	PTPN12		300678		283151	186315	185066	1.18516e+06	794473	319510			250587
Q96RE7	NACC1				495616	430547
Q13561	DCTN2										256504	229921
Q9ULH1	ASAP1
Q9NWV4	CZIB
Q9UPT8	ZC3H4		631595	317173						393993	735239	604523	366346
O96013	PAK4							454976	185544
P17275	JUNB								502172
P18031	PTPN1		236125	151338	266939	168501	86404.1		513018	346730	1.71555e+06	1.22795e+06	2.0995e+06
Q12888	TP53BP1								531496
Q9UBB9	TFIP11				155803			227307
Q15648	MED1					365633				210685
P33240	CSTF2					1.14058e+06		803865	1.24333e+06	1.04622e+06	2.1031e+06	2.26943e+06	995072
Q86VM9	ZC3H18		1.46982e+06	472393	1.40568e+06	1.95441e+06	429657	931432	116567	372726	1.18638e+06	601921	477680
P53367	ARFIP1				1.19116e+06	862128	131712	735018	564006	294134
O43719	HTATSF1					147604			174564
Q8N3D4	EHBP1L1		1.96938e+06	262612				210533	368199		384269
P55196	AFDN		1.56291e+06			1.96619e+06	955206	1.98185e+06	1.57738e+06	1.5749e+06	1.60817e+06	1136929
Q96T23	RSF1			249869	286131	254665		261682
Q92576	PHF3
Q8IX01	SUGP2								544351
Q96T58	SPEN		209461						766620	289633
Q9Y6G9	DYNC1LI1					709067
Q14241	ELOA						107958	211255
O00560	SDCBP		729666		654682	330382		1.34187e+06	397606		274217		885697
P29084	GTF2E2										455063
Q8TCU4	ALMS1							913794	511148		444869
Q13796	SHROOM2
P49756	RBM25					777158				498784	813354
O14683	TP53I11					171161	90031.2
Q07820	MCL1
Q9UN66	PCDHB8
Q96BY7	ATG2B
P52594	AGFG1					400721			450590	315907	536335
Q9HAP2	MLXIP
O75061	DNAJC6								216355
Q9NQW6	ANLN		237600	347514	193625	256943		395203	286546	173962	1.13981e+06		2.08568e+06
Q2M1Z3	ARHGAP31
Q9H074	PAIP1								265439
P30622	CLIP1							560142	222714	150830	336039
Q9H910	JPT2		222868	263561	740278	464591	279149	1.90144e+06	1.20943e+06		576895	387217	229508
O60341	KDM1A									79288.2
P48382	RFX5
Q9C0C9	UBE2O					780642		3.37153e+06	1.2891e+06	2.36217e+06	1.88117e+06	197731
O95070	YIF1A		2.26707e+06		105550								1.49595e+06
Q8TBA6	GOLGA5
Q6IBS0	TWF2					965615		914678
O95721	SNAP29									76174.8
Q9C0C2	TNKS1BP1							243833	641655	59221.8
Q9UQN3	CHMP2B				234326			679234
Q7Z5L2	R3HCC1L
Q15154	PCM1
Q9Y2W2	WBP11					138808		192725		236470	1.30942e+06	785467	423400
Q8ND82	ZNF280C		735224	525896	672334	679267			145146			542337
Q86U42	PABPN1			207405							1.23124e+06	502298
Q14596	NBR1					178233			320741	236769	427982	338121
Q92572	AP3S1					43529.9
Q14687	GSE1			224450	326077		128191
Q147X3	NAA30			127396	184798
Q9Y421	FAM32A											126034
Q15061	WDR43					3.14383e+06
Q15287	RNPS1		97810.6			51535	35633.2
Q96JM3	CHAMP1									298659	201225
P51798	CLCN7		792188		704509			384967
Q9Y4E5	ZNF451					327396		443202	339289	320787
Q5QJE6	DNTTIP2								110482			119128
Q9UKX7	NUP50		230317	146240		985049		1.33335e+06	1.18175e+06		991483	1.51731e+06
Q8N7H5	PAF1					174642	82221.7	150624
Q6P2C8	MED27
Q8WUZ0	BCL7C
O75663	TIPRL		211800
Q71DI3	H3C13, H3C14, H3C15					5.60085e+07	2.69323e+07			3.05918e+07			5.49062e+07
Q5VUA4	ZNF318		187297			1.36011e+06		265971	279194	125978			98194.2
Q8WX93	PALLD			372204		441988
Q9UGU5	HMGXB4		67385.2						145288
Q5SSJ5	HP1BP3		112282		1.02769e+06			2.98515e+06	2.08638e+06	3.85139e+06	3.21661e+06	2.86644e+06
Q7Z6E9	RBBP6					184818
Q92598	HSPH1		772893	648081	309383		154002	754239			2.19549e+06	1.22253e+06
Q9ULD2	MTUS1		437392	401548	503324	535602		674676	549463		545543	412784
P06400	RB1		906821					1.29186e+06			1.08182e+06
P35869	AHR							283851	774977	358846	421876
A6NLU0	RFPL4A					307099		651753	499607		550079	415484
O60749	SNX2		527223	336442	233280					61458.3
P50747	HLCS					472229	292494	917924		537379		399157
P20810	CAST		231821	160089	260508	211007	125990	401257	216349	187535	373599		172032
Q14966	ZNF638						61144.3		70882
Q96A57	TMEM230
Q6Y7W6	GIGYF2		113547			83434.2			176792
P50454	SERPINH1		7.9232e+08
P58876	H2BC5		2.13346e+08	1.43301e+08				3.54704e+08	1.1215e+07	3.94638e+06		7.0933e+08	2.55185e+08
P23528	CFL1		1.92787e+08	9.49794e+07	7.48038e+07	5.54995e+07		7.40342e+07	3.88706e+07		1.08463e+08		1.49194e+08
P06733	ENO1		1.20358e+08						4.38747e+07
P22626	HNRNPA2B1		1.18253e+08
P68431	H3C1, H3C2, H3C3, H3C4, H3C6, H3C7, H3C8, H3C10, H3C11, H3C12		1.15955e+08	4.03366e+07	5.5608e+07			131639662
P07910	HNRNPC		6.29452e+07	3.33041e+07					1.67341e+07
O00232	PSMD12		2.88113e+07		1.18995e+07	7.42625e+06	2.30137e+06	8.10644e+06	3.22939e+06	956670	8.10787e+06	9.69184e+06	9.11399e+06
Q15366	PCBP2		2.66733e+07	1.58949e+07	1.47696e+07	1.4034e+07	8.1087e+06	1.43693e+07	8.18279e+06			2.18158e+07
P62316	SNRPD2		2.45525e+07	1.38497e+07		7.4088e+06	3.38145e+06	1.1005e+07	3.80829e+06	3.27222e+06	1.96936e+07	1.09935e+07	1.54625e+07
P55265	ADAR		2.04868e+07		7.48908e+06	4.14895e+06
P36578	RPL4		1.94094e+07	1.22757e+07		8.92615e+06
P18669	PGAM1		1.39829e+07	6.38736e+06	9.74059e+06		2.42983e+06	3.10003e+06	2.25168e+06	2.39911e+06	1.32829e+07	1.12365e+07	5.4258e+06
P52948	NUP98		1.07823e+07		2634139	2.25442e+06	970161	2.01208e+06		1.21647e+06	2.09548e+06	3.31372e+06
Q16719	KYNU		9.0816e+06		9.24095e+06		660954	934638	1.30679e+06		3.55899e+06		7.55499e+06
Q04760	GLO1		8.21642e+06					1.95925e+06				2.28542e+06
Q13492	PICALM		6.7258e+06
P05455	SSB		6.59116e+06		3.37305e+06
Q9Y6E2	BZW2		5.18415e+06		1.50141e+06			1.79973e+06			706446		3.58725e+06
Q13148	TARDBP		4980039		1.94295e+06			1.4737e+06	782041				5.83683e+06
Q8N3C0	ASCC3		4.56372e+06		378689
P35241	RDX		4.43487e+06		1.98714e+06	1.52776e+06	1.03094e+06	1.24936e+06		554137	606517	1.06958e+06	2620503
O14617	AP3D1		4.01427e+06	1.26236e+06	1.60222e+06
P60468	SEC61B		4.00632e+06	2.15141e+06	472485	684947	327930	2144820	871040	172041	3.37475e+06	1.96592e+06	3.43226e+06
P28370	SMARCA1		3.14874e+06			495492			361917	259607			3.74852e+06
Q9UQ80	PA2G4		2.62899e+06			1.70978e+06		2.55745e+06	1.11797e+06		8.0722e+06
P04083	ANXA1		2.25545e+06			2534861		4.59247e+06	2.49833e+06	1.5418e+06	1.4242e+07	1.10293e+07	2.53839e+06
Q9Y2L1	DIS3		2.1839e+06		271626	183053
O14715	RGPD8		2.07246e+06		347938								1235651
Q8IY81	FTSJ3		2.05577e+06				49930.3
Q96L91	EP400		2.0212e+06
Q12789	GTF3C1		1.99806e+06
Q9BR76	CORO1B		1883464	1.16017e+06	1.29376e+06
Q05086	UBE3A		1.78044e+06									417969	139326
P46087	NOP2		1.55486e+06
Q16643	DBN1		1.53378e+06		823240	674507	216213	1.3925e+06	376491	552122	7.03258e+06	3.47494e+06	277169
Q96A65	EXOC4		1.47129e+06		240499	134329				156739
Q8N257	H2BC26		1.46755e+06	928493			281772	1.71342e+06	804761				1.01925e+06
Q9Y613	FHOD1		1.39398e+06	432160	429807	409350		310736					990193
Q6PD62	CTR9		1.38365e+06
O95159	ZFPL1		1.32501e+06		638622	164777	90439.3
Q9NVD7	PARVA		1.2789e+06					1.01825e+06	293856		473322		292137
Q96SB4	SRPK1		1.19376e+06	62094.1			108501	306214
Q86X10	RALGAPB		1.09414e+06
Q15080	NCF4		1.05666e+06
Q9NTJ3	SMC4		1.02517e+06	166230		177504	90323.9	1.4449e+06	715443	684550	2.31305e+06	797538	1.00365e+06
P53999	SUB1		829972	236873	535071	747147	471019	2.35031e+06	1.05637e+06	1.26629e+06	9.02506e+06	7.45156e+06
P51617	IRAK1		787076					459329
Q92888	ARHGEF1		713243
Q6UN15	FIP1L1		698699			668134	309483	374045	293063	168810	98967.9	349074
Q9NRL2	BAZ1A		689437
O00559	EBAG9		681030	579891		642650	139286
Q9NZN5	ARHGEF12		645361			177477
Q1KMD3	HNRNPUL2		625227	378902	334158	618092	151762	643641	407809	274930		1.39899e+06	455706
Q9BVC6	TMEM109		562174	366926		609090	173602		554520
Q9NP61	ARFGAP3		562023
Q9Y3B7	MRPL11		526083
O14497	ARID1A		451746			446473							126448
P47914	RPL29		423186
Q9Y426	C2CD2		400326		335714	221049	155999		250387	139262			538082
O75962	TRIO		377797		976072		190641	441499	374487		407252
Q9BUJ2	HNRNPUL1		322158		574727	220493		750287	423672	280281	1.83682e+06	1.89681e+06	823270
O14562	UBFD1		317868							282042
Q96S94	CCNL2		287519					443843			282576
O60814	H2BC12		278234		1.40134e+08								890934
Q9Y5L3	ENTPD2		264626			247504
Q86V48	LUZP1		260539	278005	376701	335844	172171	424011	1.56273e+06		647421	355349	233751
Q9NQ86	TRIM36		259000		151292
P41219	PRPH		239154
Q14151	SAFB2		228591			86815.4	88231.4	143412				2.38061e+06
Q86UP2	KTN1		226486						53555.4		1.53842e+06
Q9NW97	TMEM51		220498		168785	233775	111422
Q15121	PEA15		193540
O00499	BIN1		185283				143613
Q8N2M8	CLASRP		171916	144848	201660	199931		238763	148097	161440	222836		135003
Q6UUV9	CRTC1		162334				83455.2	150620
Q9BWT3	PAPOLG		160032
O15145	ARPC3		157901					488645	98042.3
Q9H444	CHMP4B		151199					270525	205530	117986	909746
Q9NWX6	THG1L		145284
Q969S3	ZNF622		137199		140793		83998.8
P35611	ADD1		130626
Q8IYB3	SRRM1		122967
P57723	PCBP4		108515
Q9UQB8	BAIAP2		101209
O14737	PDCD5		89621.4					69120.5		102449	479280
Q9UEE9	CFDP1		83286		747024
Q8NCU8	MTLN		67523.7
O95816	BAG2		59063.5	77846.9		306287			268124
Q96B97	SH3KBP1		58128.7
O00471	EXOC5
Q7Z589	EMSY							258363	188039	95527.6
O43293	DAPK3
O95983	MBD3
Q9H9P8	L2HGDH
Q9UPP1	PHF8
Q96NG3	ODAD4
Q9UL40	ZNF346
O60282	KIF5C
Q8N715	CCDC185
Q9Y385	UBE2J1
Q96F24	NRBF2					92923.6
O75970	MPDZ							451576
Q8IVT5	KSR1
Q8WU90	ZC3H15				131736			402651		125496	235994
Q8NBN3	TMEM87A							769370		405952
Q9UJ98	STAG3
Q4L180	FILIP1L					148556					217316
Q9ULH7	MRTFB								104026
P62736	ACTA2
Q8WXE1	ATRIP				53023.9
Q5CZC0	FSIP2
Q9UH65	SWAP70							1657452
Q9UK76	JPT1							439569	712027	153448	1.73553e+06	846860	105453
Q14738	PPP2R5D					142363
Q15032	R3HDM1						80410.1
O60934	NBN
O94916	NFAT5
Q9Y3B9	RRP15							451920			344266
Q15386	UBE3C
Q7Z2T5	TRMT1L					137649	55432.3
Q7KZI7	MARK2
O95873	C6orf47						32992
Q16526	CRY1							215347
Q9NX58	LYAR
Q14320	FAM50A
Q05397	PTK2
Q9UPQ9	TNRC6B
P51858	HDGF			5.89735e+07		3.6056e+07		4.24772e+07	1.69479e+07		3.77583e+07	4.35562e+07
P60842	EIF4A1			3.48803e+06	4.7955e+06	6.19857e+06	2.05473e+06	8669354	4.00623e+06	3.30129e+06	2.65656e+07		6.46698e+06
Q96A72	MAGOHB			2.55213e+06						1.72121e+06
Q05519	SRSF11			1972893		2.89551e+06	1.61841e+06		2546963		1.12305e+06		1.95045e+06
Q9UPU5	USP24			1.29564e+06
Q92797	SYMPK			992889	1.0458e+06				164206	77305.8
Q8IWC1	MAP7D3			451497						749171
Q7Z434	MAVS			440074	298317	45655.3			279899		167146
A0FGR8	ESYT2			427993			62295.8	218112	338232	578578	517783	394410
P33778	H2BC3			406223					116420			78988.7
Q2KHR3	QSER1			238843				400864
O94953	KDM4B			209288				185970
O43768	ENSA			194165		612441		1.39975e+06	1.30357e+06		1.69576e+06	691185	217518
O75578	ITGA10			173635
P10398	ARAF			172945				403090
Q8IWU5	SULF2			171683
Q92922	SMARCC1			168354
Q9H6S0	YTHDC2			164953		345278	222395	1.0403e+06	625066	416874		478180	270597
Q13393	PLD1			145914			74733.7
Q14160	SCRIB			142756
P0DME0	SETSIP			121701		2.12497e+06		978110
Q7Z5K2	WAPL			112630
Q8IWJ2	GCC2								127088			133146
Q15208	STK38
Q53GG5	PDLIM3
Q13951	CBFB
Q86W56	PARG
Q562R1	ACTBL2
Q96JP0	FEM1C
P48454	PPP3CC
P23381	WARS1								115566		247563
P35269	GTF2F1							285275	180798	193176	371036	577048
P29401	TKT				2.67763e+07
P08195	SLC3A2				1.21813e+07	7.40167e+06
P16070	CD44				8.62556e+06	7.15727e+06
P30566	ADSL				1.28587e+06	908805		1.07267e+06		543632
O60231	DHX16				1.28062e+06				529167
O60716	CTNND1				1.27988e+06	1.26418e+06	141541	1.4709e+06	787664		1.20462e+06	2.24346e+06
Q6UB35	MTHFD1L				1.02814e+06
Q8WZ42	TTN				681550	912380
Q9NVM6	DNAJC17				669580			1.09362e+06
Q9NVU7	SDAD1				650483
P27348	YWHAQ				496360	842188					3.27514e+06	3.07998e+06
P33176	KIF5B				459407			1.15247e+06	335821		1.16504e+06
P26640	VARS1				401214	698770	128371			74204.5
Q96L73	NSD1				361098
Q9UKM9	RALY				354761		680254
P35637	FUS				316894		171002	2.33794e+06	403568	220461		8.21277e+06
P78314	SH3BP2				278012		138432
Q15691	MAPRE1				136687			60842.9			855804
Q16799	RTN1				125400			682152
Q9Y2K1	ZBTB1				49340.9
O75915	ARL6IP5
P39748	FEN1						156426	992513	105161	310469	4.57242e+06
Q8NG31	KNL1						101521	1.29968e+06	525344	431490	955776	704032
P42574	CASP3
O15553	MEFV
Q03111	MLLT1
Q16513	PKN2
Q5D862	FLG2
Q9NT62	ATG3					124103		215334		100030
Q99590	SCAF11								150138
P63267	ACTG2
Q9HCE3	ZNF532
Q9HCH5	SYTL2					86247.3
P60608	ERVFC1-1
Q8N3V7	SYNPO
O95625	ZBTB11
Q9Y5U2	TSSC4
Q5HY98	ZNF766
P46013	MKI67							84449.8			76203.1	646523
Q15843	NEDD8					36749779		3.28705e+07		19789971	3.53881e+07
P11021	HSPA5					2.64183e+07
O75531	BANF1					1.7228e+07
P62826	RAN					1.28964e+07		1.64667e+07	9.98577e+06		2.46017e+07
Q9BY44	EIF2A					9.62001e+06			4.27852e+06
Q13200	PSMD2					8.50201e+06	1.65777e+06	8.74586e+06	1.93522e+06	2.81673e+06	1.01859e+07
P40227	CCT6A					8.0279e+06		7.33482e+06
P14866	HNRNPL					5.28517e+06		7.43675e+06
P09874	PARP1					4.8363e+06
P26599	PTBP1					3.85595e+06					8.35837e+07
P62140	PPP1CB					3.03518e+06		2.86228e+06		1.1612e+06			1.04112e+07
P53396	ACLY					2.44716e+06
Q9H2M9	RAB3GAP2					1.75542e+06				369128
P31939	ATIC					1.7009e+06	797698	1.22862e+06	485672	60507.8	1.31919e+06	1.74599e+06
Q9HAV4	XPO5					1.58493e+06
Q7L523	RRAGA					1.44097e+06
O00571	DDX3X					1.25272e+06		1.94946e+06	283669
Q14694	USP10					1.22622e+06			259358
Q13283	G3BP1					1.05795e+06			1.94189e+06	1.60253e+06	7.69563e+06	5.09076e+06
P09496	CLTA					954722		926887	872628	541251	4.17707e+06	4.1003e+06
Q8IWX8	CHERP					923073				798772
Q9Y3F4	STRAP					543788				491157
Q8N6T3	ARFGAP1					478998		349350	1.2987e+06			1.17146e+06
Q13155	AIMP2					475209		460259	382282
O43242	PSMD3					461238
Q9UPT9	USP22					364925							1.42877e+06
Q6P1N0	CC2D1A					300414
O94913	PCF11					238914	120084		166270
Q96JB1	DNAH8					235023
Q6PJT7	ZC3H14					187492
Q9NUQ3	TXLNG					122813
Q9H089	LSG1					109651
Q9UK61	TASOR					104155			139673
P21127	CDK11B					102141
Q15464	SHB					91929		109969
P10746	UROS					80410.5
O14974	PPP1R12A					77009.4		100904
O15061	SYNM							700719	407274	85202			244551
P35251	RFC1
Q96RT1	ERBIN									179534
Q9Y5X3	SNX5										451393
Q96JC9	EAF1
Q96JB5	CDK5RAP3								270320			356311	95330.1
Q9UGI8	TES
O75152	ZC3H11A
O75165	DNAJC13							375693	273698		556474
Q9P275	USP36
Q8IZP0	ABI1							375123	290128
Q96AX1	VPS33A							142709
Q29RF7	PDS5A
Q6P1R3	MSANTD2
Q8TF74	WIPF2
Q13416	ORC2										398700
O43353	RIPK2							781515	254105
Q9H0G5	NSRP1
O95810	CAVIN2
O75038	PLCH2
Q9H267	VPS33B
Q5T481	RBM20
Q8IUX8	EGFL6
O15126	SCAMP1								373028
P41236	PPP1R2
Q96CP2	FLYWCH2
Q92604	LPGAT1
Q8N436	CPXM2
Q13573	SNW1							53879.6
P78347	GTF2I							223554		80481.4			205606
Q08378	GOLGA3
Q92541	RTF1
Q92667	AKAP1
Q8IVW4	CDKL3
Q92997	DVL3
Q9Y5Z9	UBIAD1
Q9UPA5	BSN
Q8IZD4	DCP1B
Q9C0F1	CEP44
Q9NZM4	BICRA
Q6ZSR9	NA								447336			383385
Q9H6T3	RPAP3
O43172	PRPF4								259168		395575
Q9UKB1	FBXW11
Q6UB99	ANKRD11
P62424	RPL7A						4.97246e+06
Q5VWP2	TENT5C						1294772
O76070	SNCG						392572	388090			391534
Q9BZH6	WDR11						318572
Q96MU7	YTHDC1						225549
P02538	KRT6A						178363
P09493	TPM1						167827	296818		307467
Q9BXB4	OSBPL11						158574	352246	196717
Q7L8J4	SH3BP5L						127150	564882			395617
Q15562	TEAD2						118400
Q9GZY8	MFF						105903
Q6P3W7	SCYL2						74354.8
Q15054	POLD3						48132.9
Q9Y2D1	ATF5
Q9C0E8	LNPK
Q96CV9	OPTN
P35612	ADD2							272168	183134	100060	331029
O60422	ONECUT3
Q9BZE9	ASPSCR1
Q92772	CDKL2
O00425	IGF2BP3							226265	629264	564121	1.15049e+06
Q9Y2K3	MYH15
Q14353	GAMT
P51648	ALDH3A2							167642	814850	600871	793844		277003
Q86UW7	CADPS2
Q63HQ0	AP1AR							284382		115893
Q8WVB6	CHTF18
Q8TCA0	LRRC20
A3KN83	SBNO1
Q13395	TARBP1
Q9H1N7	SLC35B3
Q15596	NCOA2
Q8NGV6	OR5H6
O60507	TPST1
Q8IWI9	MGA
Q4ZG55	GREB1
Q8IYW4	ENTHD1
Q9Y4F5	CEP170B
Q8IUG5	MYO18B
Q96GS6	ABHD17A
Q9P2K5	MYEF2
Q9BV20	MRI1
Q8TEU7	RAPGEF6
Q96ST3	SIN3A
Q2KHR2	RFX7
A8MT33	SYCE1L
Q9UJC3	HOOK1
Q7Z406	MYH14
Q07001	CHRND
Q6V1P9	DCHS2
Q4G163	FBXO43
Q63HK5	TSHZ3
A0JNW5	BLTP3B
Q96M89	CCDC138
Q6NUM9	RETSAT
Q6ZMZ0	RNF19B
Q16363	LAMA4
P20929	NEB
Q96RY5	CRAMP1
Q16827	PTPRO
Q13627	DYRK1A
O43707	ACTN4							7.65261e+07	2.973e+07		1.07507e+08	9.90035e+07
P52272	HNRNPM							2.22587e+07			7.7663e+07
P61204	ARF3							1.57009e+07		2.27461e+07	2.41044e+07
P39023	RPL3							1.54972e+07			4.00795e+07
O15372	EIF3H							1.46934e+07	5.64355e+06	3.88728e+06
P43243	MATR3							1.06397e+07
Q15019	SEPTIN2							1.01432e+07	3.5723e+06
P62820	RAB1A							8.19197e+06	3.71458e+06
O95373	IPO7							7.63029e+06
P26639	TARS1							6.56232e+06	2.91229e+06	1.01991e+06
Q03518	TAP1							5.45537e+06
Q5JWF2	GNAS							4.23323e+06
A8MWD9	SNRPGP15							3.17931e+06	1.58241e+06			4.83353e+06
Q92616	GCN1							2.74753e+06	940694	1.97695e+06
P37108	SRP14							2.67388e+06
P18206	VCL							2.61195e+06	1.4452e+06		7.37988e+06	5.85341e+06	1.44975e+06
Q9Y230	RUVBL2							2.30966e+06
P51572	BCAP31							2.29946e+06	968647	556907	7.37333e+06	5.33882e+06
P05556	ITGB1							1.64401e+06	582788	276448	6.20978e+06	2.66672e+06
Q9UKV0	HDAC9							1.28614e+06			944510
Q14152	EIF3A							1.23499e+06
Q9UMS5	PHTF1							1.15935e+06
Q8NE71	ABCF1							978294
Q93079	H2BC9							971493				967704
P08240	SRPRA							958880
Q9HCK8	CHD8							922078	708566
Q9ULT8	HECTD1							848326
P49321	NASP							829216	180825
P61956	SUMO2							813377			3046502
Q86W92	PPFIBP1							796481
Q70Z53	FRA10AC1							725746					379213
O14950	MYL12B							697786	375505
Q9UQR1	ZNF148							680935	587895	485219
Q6P158	DHX57							647109			187322		532649
Q13470	TNK1							645848				207598
Q96GC9	VMP1							602800
P63208	SKP1							563429
Q9H2H8	PPIL3							483139
Q15417	CNN3							461041
Q96PU5	NEDD4L							445182	324956
Q86TM6	SYVN1							430860	422912		486239	388962	121667
Q15369	ELOC							429275				352353
Q9NW64	RBM22							427752
Q96DT5	DNAH11							414729
Q7Z460	CLASP1							410624	178988
Q9UNF1	MAGED2							394987		74828
Q96LD4	TRIM47							392640
Q8N5K1	CISD2							371431	180128		813078	700659
Q16143	SNCB							356658	388921		940339
Q00613	HSF1							341631	237978	186497	321291		130528
Q6I9Y2	THOC7							329374	137318	226723
Q92817	EVPL							311253	1727188	491404		2.48628e+06	306973
Q9HAT2	SIAE							308353
Q7Z6G8	ANKS1B							290785
P40692	MLH1							282571	138412				1.05745e+06
Q7RTV0	PHF5A							282228
Q96AY2	EME1							264436
Q9Y6A5	TACC3							257357	124353	131983
Q9HCK1	ZDBF2							256396		126405
Q9NX08	COMMD8							254893	359304
Q8IX90	SKA3							247009	165459				120495
Q9UHY1	NRBP1							244540	167595
P46937	YAP1							240168				995521
Q9Y4K1	CRYBG1							225515		849211
Q8NFJ5	GPRC5A							218472	137997
O43670	ZNF207							213748
A7KAX9	ARHGAP32							206896
Q8N6V9	TEX9							204243
P53350	PLK1							198124
P63313	TMSB10							193769	148292
Q9UBF8	PI4KB							193580
Q92974	ARHGEF2							193368
Q96H55	MYO19							192319
Q9NXT0	ZNF586							186814
Q9Y2G3	ATP11B							183764	172438
P49643	PRIM2							178125	144091
Q5JRA6	MIA3							165429
Q6R327	RICTOR							158606
Q9NP79	VTA1							145914
Q96JQ2	CLMN							140941
Q53GS7	GLE1							135750
Q5T1M5	FKBP15							128552
Q5T7W7	TSTD2							121870
P78380	OLR1							121840
Q9C0K0	BCL11B							104297
P42658	DPP6							95960.6
Q13315	ATM							65980.2
Q7Z5L9	IRF2BP2							44638.7
Q13123	IK							39946.1	591577	758686
Q9Y6D9	MAD1L1									125908		100015
O95163	ELP1
Q96KB5	PBK										138277
Q06124	PTPN11								197796	256416	2.09199e+06		3.35898e+06
P53365	ARFIP2
Q92597	NDRG1
P00918	CA2
Q5KSL6	DGKK
Q9C0B7	TANGO6
O96006	ZBED1
P60981	DSTN
O76080	ZFAND5
O43447	PPIH
Q9H4G0	EPB41L1									80211.5
Q9BW85	YJU2
Q9NUL3	STAU2
Q15654	TRIP6
Q9Y5Q8	GTF3C5								87317.5	198249
Q99567	NUP88											72198.9
O75312	ZPR1
Q99996	AKAP9
Q8N806	UBR7
Q7Z3U7	MON2
Q9BY42	RTF2
Q658P3	STEAP3
Q92620	DHX38
P19484	TFEB
Q8WYL5	SSH1
Q06787	FMR1
P23193	TCEA1
Q96SB3	PPP1R9B
Q8NEY1	NAV1									118979
O14795	UNC13B
Q8WYP5	AHCTF1
O15069	NACAD								277801
Q7Z478	DHX29
P13796	LCP1
Q9Y5E7	PCDHB2
P35240	NF2
Q9NQS1	AVEN
Q13439	GOLGA4								309869
Q14207	NPAT
P62328	TMSB4X								171020
Q9UHI6	DDX20
Q8IY18	SMC5											226161
O14593	RFXANK
Q14789	GOLGB1										172575
P50613	CDK7
O75410	TACC1
Q9NS91	RAD18
Q9NVZ3	NECAP2
Q99767	APBA2
Q8NFX7	STXBP6
Q9H788	SH2D4A
Q9Y5L0	TNPO3
Q66PJ3	ARL6IP4
Q969G3	SMARCE1
Q13625	TP53BP2
P42263	GRIA3
Q9NX40	OCIAD1
Q9Y450	HBS1L
O75351	VPS4B
O95905	ECD
P35221	CTNNA1								201776
O43572	AKAP10
P61024	CKS1B
O43493	TGOLN2										866520	734873	155743
Q6VY07	PACS1
Q13112	CHAF1B
Q96EX1	SMIM12
Q9NTG1	PKDREJ
Q8NEG5	ZSWIM2									499467	995110
Q99614	TTC1
Q9Y281	CFL2										487186
O95793	STAU1
P10636	MAPT
Q9UJV9	DDX41
Q562E7	WDR81
O75794	CDC123
Q03188	CENPC
Q9GZN8	ADISSP
O60826	CCDC22
P25490	YY1
Q7Z2Z2	EFL1
Q9UJF2	RASAL2
Q96M96	FGD4
P13861	PRKAR2A
Q8WUM0	NUP133
Q8NDX5	PHC3
Q96RU3	FNBP1
P28290	ITPRID2
Q6ICL3	TANGO2
P82979	SARNP
Q9Y6R0	NUMBL
Q8N720	ZNF655
Q15678	PTPN14									214737
O15234	CASC3
Q76G19	PDZD4
Q9NRG0	CHRAC1
P0DMB2	C8orf88
Q02241	KIF23
Q5VV42	CDKAL1
O14966	RAB29
P05141	SLC25A5								8.11351e+07
P14868	DARS1								1.14956e+07
O43169	CYB5B								3.41454e+06
P04792	HSPB1								2.37314e+06
P55884	EIF3B								2.3079e+06
E9PAV3	NACA								2.24718e+06
P51809	VAMP7								904639
Q01082	SPTBN1								868060	1.63849e+06
Q92802	N4BP2L2								776987
Q9NPQ8	RIC8A								768603	1.44249e+06
Q13547	HDAC1								503448
P35268	RPL22								494638
Q06210	GFPT1								414386	126290			1.26017e+06
P38117	ETFB								260528
O60869	EDF1								191297
Q13541	EIF4EBP1								165656
O94776	MTA2								112858
Q03001	DST								76502.6
Q16181	SEPTIN7								67535		1.15413e+06
Q96FC7	PHYHIPL								58851.7
Q9Y263	PLAA
Q86TB9	PATL1									112284
Q96A49	SYAP1
P21359	NF1
P22061	PCMT1
Q9UKJ3	GPATCH8
O75822	EIF3J
Q53H96	PYCR3
Q14676	MDC1
Q9BZ95	NSD3
Q9UNS1	TIMELESS
Q86YP4	GATAD2A
Q9C0J8	WDR33
Q8N165	PDIK1L
Q9ULR0	ISY1
Q01968	OCRL
Q8IYB1	MB21D2
Q9NYL9	TMOD3
Q5T5U3	ARHGAP21
Q9NPI6	DCP1A
Q9H1H9	KIF13A
P18887	XRCC1										225460
Q03164	KMT2A
Q86X53	ERICH1
Q8IWB9	TEX2
Q9Y4K4	MAP4K5
Q8N1G0	ZNF687
O43156	TTI1
Q9Y446	PKP3
Q9Y2X9	ZNF281									380123
Q14186	TFDP1
Q9UPS8	ANKRD26
Q96BP3	PPWD1
O43426	SYNJ1
Q9NUY8	TBC1D23
Q13263	TRIM28									6.01443e+06
P54578	USP14									2110973
Q8TCG1	CIP2A									685424
Q14814	MEF2D									609180
P30533	LRPAP1									562329
Q14195	DPYSL3									355112
P84157	MXRA7									214511	872997
P47756	CAPZB									189612
Q96P70	IPO9									158074		946942	1.4963e+06
P29966	MARCKS									133097		1.10989e+06
P09497	CLTB									92687.4
Q4VC31	MIX23
P23511	NFYA
P53801	PTTG1IP
Q96IK1	BOD1
Q69YQ0	SPECC1L
Q8N4V1	MMGT1
Q9Y2H6	FNDC3A
Q6PD74	AAGAB
O94875	SORBS2
Q6NSI4	RADX
Q9BRG1	VPS25
P49753	ACOT2
O95239	KIF4A
P57076	CFAP298
O75643	SNRNP200										2.06373e+07
Q16777	H2AC20										5.84689e+08
P34931	HSPA1L
P43121	MCAM										207210
Q9Y2K7	KDM2A
Q15836	VAMP3										2749770
Q9P0P8	MTRES1
Q96C24	SYTL4										124677
Q86VQ0	LCA5
Q9UEE5	STK17A
Q8IXQ3	C9orf40
Q76M96	CCDC80										817771
Q8IZ21	PHACTR4										1.18385e+06
Q5JTC6	AMER1										378384	335260	244122
Q629K1	TRIQK										339840
Q5SYE7	NHSL1
Q9GZT6	CCDC90B
O75334	PPFIA2
P46100	ATRX
Q13613	MTMR1										259270
Q9BX63	BRIP1
P49454	CENPF
Q15029	EFTUD2											1.9136e+07
Q02539	H1-1
Q12872	SFSWAP
P43146	DCC											715277
Q719H9	KCTD1											577720
P41208	CETN2											346133
Q5VVW2	GARNL3											3.5589e+06
Q8IZD9	DOCK3
Q9UP79	ADAMTS8
O00291	HIP1
O95259	KCNH1
Q0VDD8	DNAH14
P09172	DBH
Q5QGS0	NEXMIF
Q9H8X9	ZDHHC11
P78371	CCT2												2.47118e+07
Q8WWH5	TRUB1												463181
Q99880	H2BC13												387186
Q9BZJ0	CRNKL1												111436
Q9NRM1	ENAM
Q5T3I0	GPATCH4
A4UGR9	XIRP2
Q96PC5	MIA2
Q02040	AKAP17A
Q9H7F4	TMEM185B
Q8TCD6	PHOSPHO2
Q9NZ43	USE1
Q5SVZ6	ZMYM1

## Sheet: Excluded NBirA Proteins
Accession	Gene.Name	rawprot_FL1	rawprot_FL2	rawprot_FL3	rawprot_FP1	rawprot_FP2	rawprot_FP3	rawprot_NL1	rawprot_NL2	rawprot_NL3	rawprot_NP1	rawprot_NP2	rawprot_NP3	rawprot_SL1	rawprot_SL2	rawprot_SL3	rawprot_SP1	rawprot_SP2	rawprot_SP3
P37840	SNCA	1.84559e+09	1.70105e+09	1.46828e+09	2.26255e+09	2.28331e+09	1.27004e+09	2.51085e+07	2.88298e+07	3.42041e+07	2.52471e+08	3.1465e+07	7.97816e+07	1.82926e+10	1.68772e+10	1.15967e+10	1.53735e+10	1.35869e+10	8.56193e+09
P21333	FLNA	7.98968e+08	6.65268e+08	5.10275e+08	6.71628e+08	7.95573e+08	4.05582e+08		1.81774e+08			9.00141e+07	2.36563e+08	1.37268e+09	1.23908e+09	7.6135e+08	1.2588e+09	9.25684e+08	6.23309e+08
Q6FI13	H2AC18	1.5357e+08		1.36983e+08				3.00842e+08	1.87939e+08						5175930	1.18102e+08		4.73024e+08	1.79138e+08
Q96RQ3	MCCC1	1.41114e+08	1.11797e+08	5.05862e+07	1.44146e+08	1.04758e+08	4.77841e+07	1.69999e+08	106339075	4.94335e+07	1.56047e+08	4.32989e+06	2.37372e+07	4.26413e+07	4.80506e+07	2.53837e+07	4.30204e+07	6.11789e+07	2.55728e+07
P05165	PCCA	8.75102e+07	6.48495e+07	3.18989e+07	56879120	95735049	3.79355e+07	3.52424e+07	4.68893e+07	10907758	4.69045e+07	4403024	10442353	5.64638e+07	4.59616e+07	3.21314e+07	4.10468e+07	5.79628e+07	3.18238e+07
P11498	PC	5.76909e+07	1.6252e+08	4.24835e+07	57295455	6.15779e+07	7.14698e+07	2.35015e+08	1.14355e+08	1.04358e+08	1.44851e+08	4194646	8.52882e+07	5.16373e+07	6.64162e+07	5.49797e+07	7.93875e+07	1.25541e+08	27956472
Q15149	PLEC	1.54877e+07	4.57958e+07	1.84806e+07	1.94974e+07	1.68563e+07	4.53272e+06			7.60207e+07				2.55673e+07	9.54899e+06	6.76559e+06	9.76975e+07	7.75777e+07	4.24185e+07
Q14247	CTTN	1.2391e+07	6.77752e+06	5.66779e+06	9.3996e+06	1.38605e+07	4.55544e+06		211078					1.76494e+07	1.74805e+07	1.07819e+07	1.84059e+07	1.12251e+07	6.3616e+06
Q68CZ2	TNS3	7.7103e+06	2.16523e+07	8.12492e+06	1.32826e+07	4.62896e+06	2.00806e+06			3.05795e+07				9.44597e+06	4.97744e+06	3.92148e+06	5.11722e+06	7.80397e+06	1.82596e+07
O75533	SF3B1	3.28601e+06	2.67787e+07	1.41762e+07	1.13674e+07	7.36211e+06	1.57731e+06				1.52329e+07			1.10101e+07	2.38581e+06	2.06592e+06	1.65976e+07	6.2111e+06	2.29034e+07
P20671	H2AC7	3.15519e+06		1.15592e+07					3.44359e+06						1.2465e+08	977642		4634437	1.04749e+06
P23946	CMA1	2.18611e+06	999455	549360	647131	3.51339e+06	617463	2.98213e+06	4.24412e+06	5.8815e+06	2.68201e+07	2.76354e+06	1.68634e+06	3.03597e+06	1.00189e+06	831009	348603	11767851	1.91055e+06
P50914	RPL14	1.76432e+06	6.04201e+06	3.1433e+06	5.15011e+06	3.03763e+06	940512			1.2564e+07				5.53187e+06	2.10577e+06	1.94942e+06	1.72748e+07		4.97129e+06
Q7Z2W9	MRPL21		6.50061e+06						6.85781e+06
Q9UHY7	ENOPH1										278704
Q8IUE6	H2AC21			4868599				5.07768e+06	4845375						4943866	4.36976e+06	145569	14410251	4780314
O14828	SCAMP3					202720							3189064	418847	83673.9				284656
Q8N0X7	SPART								2413498					1.82301e+06	327851	258151	1.65656e+06	285695
P04908	H2AC4							3.08326e+07									7744788
O43237	DYNC1LI2							3.69451e+06
Q9Y6N5	SQOR							1.44772e+06
Q92733	PRCC							155850
B6SEH9	ERVV-2							22805.2
Q5SRE5	NUP188								1.57033e+07
Q96L93	KIF16B								3.49375e+06
P37837	TALDO1									4.14642e+07
O15371	EIF3D									1.12524e+07
Q8WXH0	SYNE2									3.08266e+06					192148
A6NGC4	TLCD2									1.84174e+06
Q9P015	MRPL15									875113
Q9H3S7	PTPN23									850556
Q14CX7	NAA25									129578			137353
A8K8P3	SFI1										936319
Q9Y3R5	DOP1B										612578
Q9C0D2	CEP295										181932
P10253	GAA												1.19879e+07
Q9Y3Q0	NAALAD2												3.96021e+06
P84022	SMAD3												1.48405e+06
O95630	STAMBP												259661

## Sheet: Excluded 0 or 1 rep
Accession	Gene Name	rawprot_FL1	rawprot_FL2	rawprot_FL3	rawprot_FP1	rawprot_FP2	rawprot_FP3	rawprot_NL1	rawprot_NL2	rawprot_NL3	rawprot_NP1	rawprot_NP2	rawprot_NP3	rawprot_SL1	rawprot_SL2	rawprot_SL3	rawprot_SP1	rawprot_SP2	rawprot_SP3
Q6PD74	AAGAB
Q8NE71	ABCF1													978294
Q96GS6	ABHD17A
P53396	ACLY					2.44716e+06
P49753	ACOT2
P62736	ACTA2
Q562R1	ACTBL2
P63267	ACTG2
P61160	ACTR2	1.56673e+07				1.26016e+07
Q9UP79	ADAMTS8
P35611	ADD1		130626
Q9GZN8	ADISSP
Q8WYP5	AHCTF1
Q92667	AKAP1
O43572	AKAP10
Q02040	AKAP17A
Q99996	AKAP9
Q6UB99	ANKRD11
Q9UPS8	ANKRD26
Q7Z6G8	ANKS1B													290785
Q92572	AP3S1					43529.9
Q99767	APBA2
P10398	ARAF			172945										403090
Q9NP61	ARFGAP3		562023
P53365	ARFIP2
Q5T5U3	ARHGAP21
Q2M1Z3	ARHGAP31
A7KAX9	ARHGAP32													206896
Q92888	ARHGEF1		713243
Q9NZN5	ARHGEF12		645361			177477
Q92974	ARHGEF2													193368
O14497	ARID1A		451746			446473													126448
Q68CP9	ARID2	2.23931e+06				2.00039e+06									1.56899e+06
Q66PJ3	ARL6IP4
O75915	ARL6IP5
P27540	ARNT													251290
Q9ULH1	ASAP1
Q8N3C0	ASCC3		4.56372e+06		378689
Q9BZE9	ASPSCR1
Q9Y2D1	ATF5
Q96BY7	ATG2B
Q13315	ATM													65980.2
Q8WXE1	ATRIP				53023.9
P46100	ATRX
Q9NQS1	AVEN
Q9UQB8	BAIAP2		101209
O75531	BANF1					1.7228e+07
Q9NRL2	BAZ1A		689437
Q9C0K0	BCL11B													104297
Q8WUZ0	BCL7C
Q9NZM4	BICRA
O00499	BIN1		185283				143613
A0JNW5	BLTP3B
Q96IK1	BOD1
Q9BX63	BRIP1
Q9UPA5	BSN
P41223	BUD31						109236									153852			110203
O95873	C6orf47						32992
P0DMB2	C8orf88
Q8IXQ3	C9orf40
P00918	CA2
Q86UW7	CADPS2
P47756	CAPZB															189612
O15234	CASC3
P42574	CASP3
O95810	CAVIN2
Q13951	CBFB
Q6P1N0	CC2D1A					300414
Q96M89	CCDC138
Q8N715	CCDC185
O60826	CCDC22
Q76M96	CCDC80																817771
Q9GZT6	CCDC90B
Q96S94	CCNL2		287519											443843			282576
P78371	CCT2																		2.47118e+07
P40227	CCT6A					8.0279e+06								7.33482e+06
O75794	CDC123
P21127	CDK11B					102141
P50613	CDK7
Q5VV42	CDKAL1
Q92772	CDKL2
Q8IVW4	CDKL3
Q03188	CENPC
P49454	CENPF
Q9Y4F5	CEP170B
Q9C0F1	CEP44
P41208	CETN2																	346133
P57076	CFAP298
Q9UEE9	CFDP1		83286		747024
Q9Y281	CFL2																487186
Q13112	CHAF1B
Q96JM3	CHAMP1															298659	201225
Q8IWX8	CHERP					923073										798772
Q9UQN3	CHMP2B				234326									679234
Q9NRG0	CHRAC1
Q07001	CHRND
Q8WVB6	CHTF18
Q8TCG1	CIP2A															685424
P61024	CKS1B
P51798	CLCN7		792188		704509									384967
Q96JQ2	CLMN													140941
P09497	CLTB															92687.4
Q15417	CNN3													461041
Q8N436	CPXM2
Q96RY5	CRAMP1
Q9BZJ0	CRNKL1																		111436
Q6UUV9	CRTC1		162334				83455.2							150620
Q53ET0	CRTC2			143019	139924
Q16526	CRY1													215347
P35221	CTNNA1														201776
Q6PD62	CTR9		1.38365e+06
O43169	CYB5B														3.41454e+06
Q9NWV4	CZIB
P53355	DAPK1	759299
O43293	DAPK3
P14868	DARS1														1.14956e+07
P09172	DBH
P43146	DCC																	715277
Q6V1P9	DCHS2
Q9NPI6	DCP1A
Q8IZD4	DCP1B
Q9UHI6	DDX20
Q9UJV9	DDX41
Q5VZ89	DENND4C	341500				368234										146929
Q5KSL6	DGKK
O60231	DHX16				1.28062e+06										529167
Q7Z478	DHX29
Q92620	DHX38
Q96DT5	DNAH11													414729
Q0VDD8	DNAH14
Q96JB1	DNAH8					235023
Q9NVM6	DNAJC17				669580									1.09362e+06
O75061	DNAJC6														216355
Q5QJE6	DNTTIP2														110482			119128
Q8IZD9	DOCK3
P42658	DPP6													95960.6
Q14195	DPYSL3															355112
Q03001	DST														76502.6
P60981	DSTN
Q92997	DVL3
Q9Y6G9	DYNC1LI1					709067
Q13627	DYRK1A
Q96JC9	EAF1
O95905	ECD
O60869	EDF1														191297
Q7Z2Z2	EFL1
Q15029	EFTUD2																	1.9136e+07
Q8IUX8	EGFL6
Q9BY44	EIF2A					9.62001e+06									4.27852e+06
Q14152	EIF3A													1.23499e+06
P55884	EIF3B														2.3079e+06
O75822	EIF3J
Q13541	EIF4EBP1														165656
Q9NRA8	EIF4ENIF1													488617
Q14241	ELOA						107958							211255
Q15369	ELOC													429275				352353
O95163	ELP1
Q96EB1	ELP4	523469				963641									533699
Q96AY2	EME1													264436
Q9NRM1	ENAM
P06733	ENO1		1.20358e+08												4.38747e+07
Q8IYW4	ENTHD1
Q9Y5L3	ENTPD2		264626			247504
Q96C92	ENTR1	199428
Q96L91	EP400		2.0212e+06
Q9H4G0	EPB41L1															80211.5
Q9Y6I3	EPN1	366710
Q96RT1	ERBIN															179534
Q86X53	ERICH1
P60608	ERVFC1-1
P38117	ETFB														260528
O00471	EXOC5
Q9Y421	FAM32A																	126034
Q14320	FAM50A
Q658Y4	FAM91A1					570893									551936		573818
Q4G163	FBXO43
Q9UKB1	FBXW11
Q96JP0	FEM1C
Q96M96	FGD4
Q4L180	FILIP1L					148556											217316
Q5T1M5	FKBP15													128552
Q5D862	FLG2
Q96CP2	FLYWCH2
Q06787	FMR1
Q96RU3	FNBP1
Q9Y2H6	FNDC3A
Q70Z53	FRA10AC1													725746					379213
Q5CZC0	FSIP2
Q8IY81	FTSJ3		2.05577e+06				49930.3
Q14353	GAMT
Q5VVW2	GARNL3																	3.5589e+06
Q86YP4	GATAD2A
Q8IWJ2	GCC2														127088			133146
Q6Y7W6	GIGYF2		113547			83434.2									176792
Q53GS7	GLE1													135750
Q04760	GLO1		8.21642e+06											1.95925e+06				2.28542e+06
Q5JWF2	GNAS													4.23323e+06
Q08379	GOLGA2
Q08378	GOLGA3
Q13439	GOLGA4														309869
Q8TBA6	GOLGA5
Q14789	GOLGB1																172575
Q5T3I0	GPATCH4
Q9UKJ3	GPATCH8
Q4ZG55	GREB1
P42263	GRIA3
P29084	GTF2E2																455063
Q12789	GTF3C1		1.99806e+06
Q02539	H1-1
Q16777	H2AC20																5.84689e+08
O60814	H2BC12		278234		1.40134e+08														890934
Q99880	H2BC13																		387186
P33778	H2BC3			406223											116420			78988.7
Q93079	H2BC9													971493				967704
Q9Y450	HBS1L
Q13547	HDAC1														503448
Q9UKV0	HDAC9													1.28614e+06			944510
Q9ULT8	HECTD1													848326
O00291	HIP1
Q9UGU5	HMGXB4		67385.2												145288
P22626	HNRNPA2B1		1.18253e+08
P14866	HNRNPL					5.28517e+06								7.43675e+06
P52272	HNRNPM													2.22587e+07			7.7663e+07
Q9UJC3	HOOK1
P34931	HSPA1L
P11021	HSPA5					2.64183e+07
P04792	HSPB1														2.37314e+06
O43719	HTATSF1					147604									174564
O95373	IPO7													7.63029e+06
P51617	IRAK1		787076											459329
Q7Z5L9	IRF2BP2													44638.7
Q9ULR0	ISY1
O75578	ITGA10			173635
P28290	ITPRID2
P17275	JUNB														502172
O95259	KCNH1
Q719H9	KCTD1																	577720
O60341	KDM1A															79288.2
Q9Y2K7	KDM2A
O94953	KDM4B			209288										185970
Q96AT1	KIAA1143	468351				446447								1.08671e+06
Q9H1H9	KIF13A
Q02241	KIF23
O95239	KIF4A
O60282	KIF5C
Q03164	KMT2A
P02538	KRT6A						178363
Q8IVT5	KSR1
Q86UP2	KTN1		226486												53555.4		1.53842e+06
Q9H9P8	L2HGDH
Q16363	LAMA4
Q86VQ0	LCA5
P13796	LCP1
Q9C0E8	LNPK
Q92604	LPGAT1
P30533	LRPAP1															562329
Q8TCA0	LRRC20
Q9C099	LRRCC1	976446
Q9H089	LSG1					109651
Q9NX58	LYAR
Q9Y6D9	MAD1L1															125908		100015
Q96A72	MAGOHB			2.55213e+06												1.72121e+06
Q9Y4K4	MAP4K5
Q8IWC1	MAP7D3			451497												749171
Q15691	MAPRE1				136687									60842.9			855804
P10636	MAPT
P29966	MARCKS															133097		1.10989e+06
Q7KZI7	MARK2
P43243	MATR3													1.06397e+07
Q8IYB1	MB21D2
O95983	MBD3
P43121	MCAM																207210
Q07820	MCL1
Q14676	MDC1
Q15648	MED1					365633										210685
Q6P2C8	MED27
Q14814	MEF2D															609181
O15553	MEFV
Q9GZY8	MFF						105903
Q8IWI9	MGA
Q96PC5	MIA2
Q5JRA6	MIA3													165429
Q4VC31	MIX23
Q03111	MLLT1
Q9HAP2	MLXIP
Q8N4V1	MMGT1
Q7Z3U7	MON2
O75970	MPDZ													451576
P49959	MRE11					321760
Q9BV20	MRI1
Q9Y3B7	MRPL11		526083
Q9ULH7	MRTFB														104026
Q6P1R3	MSANTD2
O94776	MTA2														112858
Q6UB35	MTHFD1L				1.02814e+06
Q8NCU8	MTLN		67523.7
Q13613	MTMR1																259270
Q9Y217	MTMR6	1222341				1.36006e+06
Q9P0P8	MTRES1
P84157	MXRA7															214511	872997
Q9P2K5	MYEF2
Q7Z406	MYH14
Q9Y2K3	MYH15
Q8IUG5	MYO18B
Q96H55	MYO19													192319
Q92802	N4BP2L2														776987
Q6ZSR9	NA														447336			383385
Q147X3	NAA30			127396	184798
E9PAV3	NACA														2.24718e+06
O15069	NACAD														277801
Q8NEY1	NAV1															118979
O60934	NBN
Q15080	NCF4		1.05666e+06
Q15596	NCOA2
Q92597	NDRG1
P20929	NEB
Q9NVZ3	NECAP2
Q5QGS0	NEXMIF
P21359	NF1
P35240	NF2
O94916	NFAT5
P23511	NFYA
Q5SYE7	NHSL1
P15531	NME1	1.68689e+07				6.08992e+06									2.19558e+06		1.32273e+07
P46087	NOP2		1.55486e+06
Q14207	NPAT
Q96F24	NRBF2					92923.6
Q96L73	NSD1				361098
Q9BZ95	NSD3
Q9H0G5	NSRP1
Q9Y6R0	NUMBL
Q8WUM0	NUP133
Q99567	NUP88																	72198.9
Q9NX40	OCIAD1
Q01968	OCRL
Q96NG3	ODAD4
P78380	OLR1													121840
O60422	ONECUT3
Q96CV9	OPTN
Q8NGV6	OR5H6
Q13416	ORC2																398700
Q6VY07	PACS1
Q9H074	PAIP1														265439
Q8WX93	PALLD			372204		441988
P51003	PAPOLA
Q9BWT3	PAPOLG		160032
Q86W56	PARG
P09874	PARP1					4.8363e+06
Q86TB9	PATL1															112284
Q96KB5	PBK																138277
P57723	PCBP4		108515
Q9Y5E7	PCDHB2
Q9UN66	PCDHB8
Q15154	PCM1
P22061	PCMT1
Q8N165	PDIK1L
Q53GG5	PDLIM3
Q29RF7	PDS5A
Q76G19	PDZD4
Q15121	PEA15		193540
Q8IZ21	PHACTR4																1.18385e+06
Q9H814	PHAX	234502												371528
Q8NDX5	PHC3
Q92576	PHF3
Q7RTV0	PHF5A													282228
Q9UPP1	PHF8
Q8TCD6	PHOSPHO2
Q9UMS5	PHTF1													1.15935e+06
Q96FC7	PHYHIPL														58851.7
Q9UBF8	PI4KB													193580
Q13492	PICALM		6.7258e+06
Q9NTG1	PKDREJ
Q16513	PKN2
Q9Y446	PKP3
Q9Y263	PLAA
O75038	PLCH2
Q13393	PLD1			145914			74733.7
P53350	PLK1													198124
Q15054	POLD3						48132.9
P24928	POLR2A	175915														657627
O75334	PPFIA2
Q86W92	PPFIBP1													796481
O43447	PPIH
Q9H2H8	PPIL3													483139
O14974	PPP1R12A					77009.4								100904
P41236	PPP1R2
Q96SB3	PPP1R9B
Q14738	PPP2R5D					142363
P48454	PPP3CC
Q96BP3	PPWD1
P13861	PRKAR2A
O43172	PRPF4														259168		395575
Q6P2Q9	PRPF8	4.55523e+07
P41219	PRPH		239154
P35998	PSMC2	357901												282987			3.35019e+06
O43242	PSMD3					461238
P26599	PTBP1					3.85595e+06											8.35837e+07
Q05397	PTK2
P20962	PTMS	160694					144104							343880
Q15678	PTPN14															214737
Q16827	PTPRO
P53801	PTTG1IP
Q53H96	PYCR3
Q2TAL8	QRICH1	142453
Q2KHR3	QSER1			238843										400864
Q7Z5L2	R3HCC1L
Q15032	R3HDM1						80410.1
O14966	RAB29
Q9H2M9	RAB3GAP2					1.75542e+06										369128
Q9NS91	RAD18
Q6NSI4	RADX
Q86X10	RALGAPB		1.09414e+06
Q8TEU7	RAPGEF6
Q9UJF2	RASAL2
P06400	RB1		906821											1.29186e+06			1.08182e+06
Q7Z6E9	RBBP6					184818
Q5T481	RBM20
Q9NW64	RBM22													427752
P49756	RBM25					777158										498784	813354
Q9P2N5	RBM27	1.21477e+06				982542
Q6NUM9	RETSAT
P35251	RFC1
P48382	RFX5
Q2KHR2	RFX7
O14593	RFXANK
O14715	RGPD8		2.07246e+06		347938														1235651
Q6R327	RICTOR													158606
O15541	RNF113A
Q6ZMZ0	RNF19B
P13489	RNH1	311782
Q9H6T3	RPAP3
P27635	RPL10	9.50121e+06
P35268	RPL22														494638
P47914	RPL29		423186
P39023	RPL3													1.54972e+07			4.00795e+07
P62424	RPL7A						4.97246e+06
Q7L523	RRAGA					1.44097e+06
Q9Y3B9	RRP15													451920			344266
Q5VWQ0	RSBN1	411836
Q92541	RTF1
Q9BY42	RTF2
Q16799	RTN1				125400									682152
Q9Y230	RUVBL2													2.30966e+06
P82979	SARNP
A3KN83	SBNO1
Q99590	SCAF11														150138
O15126	SCAMP1														373028
Q14160	SCRIB			142756
Q6P3W7	SCYL2						74354.8
Q9NVU7	SDAD1				650483
Q16181	SEPTIN7														67535		1.15413e+06
P50454	SERPINH1		7.9232e+08
P0DME0	SETSIP			121701		2.12497e+06								978110
Q12872	SFSWAP
Q9H788	SH2D4A
Q7L8J4	SH3BP5L						127150							564882			395617
Q96B97	SH3KBP1		58128.7
Q15464	SHB					91929								109969
Q13796	SHROOM2
Q9HAT2	SIAE													308353
Q96ST3	SIN3A
P63208	SKP1													563429
P05141	SLC25A5														8.11351e+07
Q9H1N7	SLC35B3
Q9H2G2	SLK	385054				363799									399584
Q92922	SMARCC1			168354
Q969G3	SMARCE1
Q8IY18	SMC5																	226161
Q96EX1	SMIM12
O95721	SNAP29															76174.8
O76070	SNCG						392572							388090			391534
O75643	SNRNP200																2.06373e+07
Q13573	SNW1													53879.6
Q9Y5X3	SNX5																451393
O94875	SORBS2
Q69YQ0	SPECC1L
P37108	SRP14													2.67388e+06
P08240	SRPRA													958880
Q8IYB3	SRRM1		122967
P05455	SSB		6.59116e+06		3.37305e+06
Q8WYL5	SSH1
Q9UJ98	STAG3
O75886	STAM2	342347				465808
O95793	STAU1
Q9NUL3	STAU2
Q658P3	STEAP3
Q9UEE5	STK17A
Q15208	STK38
Q9Y3F4	STRAP					543788										491157
Q8NFX7	STXBP6
Q8IX01	SUGP2														544351
Q8IWU5	SULF2			171683
P61956	SUMO2													813377			3046502
Q9UH65	SWAP70													1657452
Q96A49	SYAP1
A8MT33	SYCE1L
O43426	SYNJ1
Q8N3V7	SYNPO
Q9UMZ2	SYNRG
Q9HCH5	SYTL2					86247.3
Q96C24	SYTL4																124677
O75410	TACC1
Q6ICL3	TANGO2
Q9C0B7	TANGO6
Q03518	TAP1													5.45537e+06
Q13395	TARBP1
Q9UK61	TASOR					104155									139673
Q9NUY8	TBC1D23
P23193	TCEA1
Q15562	TEAD2						118400
Q5VWP2	TENT5C						1294772
Q9UGI8	TES
Q8IWB9	TEX2
Q8N6V9	TEX9													204243
Q14186	TFDP1
P19484	TFEB
Q9UBB9	TFIP11				155803									227307
P35442	THBS2		199146
Q9NWX6	THG1L		145284
Q9UNS1	TIMELESS
O75663	TIPRL		211800
P29401	TKT				2.67763e+07
Q9H7F4	TMEM185B
Q96A57	TMEM230
Q9NYL9	TMOD3
P62328	TMSB4X														171020
Q13470	TNK1													645848				207598
Q9Y5L0	TNPO3
Q9UPQ9	TNRC6B
Q12888	TP53BP1														531496
Q13625	TP53BP2
O60507	TPST1
Q13263	TRIM28															6.01443e+06
Q9NQ86	TRIM36		259000		151292
Q96LD4	TRIM47													392640
Q14669	TRIP12	198861												487532
Q15654	TRIP6
Q629K1	TRIQK																339840
Q8WWH5	TRUB1																		463181
Q63HK5	TSHZ3
Q9Y5U2	TSSC4
Q5T7W7	TSTD2													121870
Q99614	TTC1
O43156	TTI1
Q6IBS0	TWF2					965615								914678
Q9NUQ3	TXLNG					122813
Q9Y385	UBE2J1
Q15386	UBE3C
O14562	UBFD1		317868													282042
Q9Y5Z9	UBIAD1
Q8N806	UBR7
O94888	UBXN7	645327
O14795	UNC13B
P10746	UROS					80410.5
Q9NZ43	USE1
Q14694	USP10					1.22622e+06									259358
P54578	USP14															2110973
Q9UPT9	USP22					364925													1.42877e+06
Q9UPU5	USP24			1.29564e+06
Q9P275	USP36
Q15836	VAMP3																2749770
P51809	VAMP7														904639
Q96GC9	VMP1													602800
Q9BRG1	VPS25
Q96AX1	VPS33A													142709
Q9H267	VPS33B
O75351	VPS4B
Q9NP79	VTA1													145914
Q7Z5K2	WAPL			112630
P23381	WARS1														115566		247563
Q9BZH6	WDR11						318572
Q9C0J8	WDR33
Q15061	WDR43					3.14383e+06
Q562E7	WDR81
Q8TF74	WIPF2
A4UGR9	XIRP2
Q9HAV4	XPO5					1.58493e+06
P18887	XRCC1																225460
P46937	YAP1													240168				995521
Q9ULM3	YEATS2
O95070	YIF1A		2.26707e+06		105550														1.49595e+06
Q9BW85	YJU2
Q96MU7	YTHDC1						225549
P25490	YY1
O96006	ZBED1
Q9Y2K1	ZBTB1				49340.9
O95625	ZBTB11
O75152	ZC3H11A
Q6PJT7	ZC3H14					187492
Q9H8X9	ZDHHC11
Q9C0B5	ZDHHC5	293163													323912
O76080	ZFAND5
Q5SVZ6	ZMYM1
O43670	ZNF207													213748
Q9Y2X9	ZNF281															380123
Q9UL40	ZNF346
Q9HCE3	ZNF532
Q9NXT0	ZNF586													186814
Q14966	ZNF638						61144.3								70882
Q8N720	ZNF655
Q8N1G0	ZNF687
A6NP11	ZNF716
A8MTY0	ZNF724	205018
Q5HY98	ZNF766
Q96NB3	ZNF830		314235				154400
O75312	ZPR1
Q8NEG5	ZSWIM2															499467	995110

## Sheet: Post Exclusion Proteins
Accession	Gene Name	rawprot_FL1	rawprot_FL2	rawprot_FL3	rawprot_FP1	rawprot_FP2	rawprot_FP3	rawprot_NL1	rawprot_NL2	rawprot_NL3	rawprot_NP1	rawprot_NP2	rawprot_NP3	rawprot_SL1	rawprot_SL2	rawprot_SL3	rawprot_SP1	rawprot_SP2	rawprot_SP3
Q2M2I8	AAK1	414010	757379	743478	475761	830309	679325							1.8478e+06	1.29988e+06	919103	1.40597e+06	743903	316242
Q9UG63	ABCF2	2.29339e+06	6.10276e+06		3.47081e+06	1.82107e+06	266992							4.56986e+06	1.36945e+06	1.24195e+06	1.01688e+06		4.31791e+06
Q8IZP0	ABI1													375123	290128
Q9UKV3	ACIN1	636316	1.46047e+06	438781	657498	534583	192916							516321	1.15115e+06	565240	1.79635e+06	1133590	1.46975e+06
P60709	ACTB	4.3878e+08	5.41026e+08	4.719e+08	2.86375e+08	5.42996e+08								4.56913e+08	3.13222e+08	2.06289e+08	1.18576e+09	9.40113e+08	3.36514e+08
P68032	ACTC1	1.19284e+07	1.23085e+07	891853	6.64609e+06	1.16274e+07								1.38792e+07	6.255e+06	3372772	4.90983e+07	3.87546e+07	1.99706e+07
O43707	ACTN4													7.65261e+07	2.973e+07		1.07507e+08	9.90035e+07
P55265	ADAR		2.04868e+07		7.48908e+06	4.14895e+06
P35612	ADD2													272168	183134	100060	331029
Q9H2P0	ADNP	908274	2.27595e+06	953955			247932							1.12114e+06	527573			1376514	2.52796e+06
P30566	ADSL				1.28587e+06	908805								1.07267e+06		543632
P55196	AFDN		1.56291e+06			1.96619e+06	955206							1.98185e+06	1.57738e+06	1.5749e+06	1.60817e+06	1136929
Q9UHB7	AFF4	2.14127e+06	1.31261e+06		930998	1.62273e+06	778348							1.08721e+06	1.44628e+06	530332	800256	907911
P52594	AGFG1					400721									450590	315907	536335
Q09666	AHNAK	3.0764e+08	2.10434e+08	1.43925e+08	2.75456e+08	3.00264e+08	1.30493e+08							9.17862e+08	7.90666e+08	4.96909e+08	7.75433e+08	6.21329e+08	3.40901e+08
Q8IVF2	AHNAK2	2.16087e+06	3.19689e+06	135207	2.30666e+06	2.60364e+06	779404							2.4069e+07	1.59615e+07	8.88662e+06	1.60908e+07	1.1778e+07	3.92603e+06
P35869	AHR													283851	774977	358846	421876
O95433	AHSA1	2.52631e+06	4.50073e+06	703787	208894	2.62287e+06	126088							560622	2.56066e+06	1.58537e+06	1.00373e+06	1.34518e+06	2.34079e+06
Q13155	AIMP2					475209								460259	382282
P51648	ALDH3A2													167642	814850	600871	793844		277003
Q9NP73	ALG13	1216205			758354									928032	755950
Q8TCU4	ALMS1													913794	511148		444869
Q5JTC6	AMER1																378384	335260	244122
O75179	ANKRD17	1.58674e+06	1.52654e+06	1.01914e+06	1.36132e+06	1.40815e+06	615904							1.58373e+06	1.08299e+06	621377	1.45557e+06	1.09618e+06	646225
Q92625	ANKS1A	764825	1.11605e+06	744343	668577	906069	461036							1.02152e+06	690218		749241	558352
Q9NQW6	ANLN		237600	347514	193625	256943								395203	286546	173962	1.13981e+06		2.08568e+06
P04083	ANXA1		2.25545e+06			2534861								4.59247e+06	2.49833e+06	1.5418e+06	1.4242e+07	1.10293e+07	2.53839e+06
P07355	ANXA2	5.2153e+07	1.08267e+08	5.78441e+07	5.01554e+07	4.72558e+07	2.05358e+07							8.62065e+07	5.08668e+07	3.88767e+07	1.33541e+08	1.36144e+08	9.8595e+07
Q63HQ0	AP1AR													284382		115893
O14617	AP3D1		4.01427e+06	1.26236e+06	1.60222e+06
P48444	ARCN1	4.00291e+06	1.77508e+07	1.11185e+07	8.51855e+06	4.73786e+06	2.34831e+06							4.66116e+06	2.44578e+06	2.07183e+06	6.86303e+06	6.48551e+06	8.707e+06
P61204	ARF3													1.57009e+07		2.27461e+07	2.41044e+07
Q8N6T3	ARFGAP1					478998								349350	1.2987e+06			1.17146e+06
P53367	ARFIP1				1.19116e+06	862128	131712							735018	564006	294134
Q9NWB6	ARGLU1	304558		230301	381632	127368	155211							163557			636758
Q07960	ARHGAP1	5.75811e+06												5.86436e+06	2.21129e+06		4.29724e+06
Q9NRY4	ARHGAP35	476516	1.29865e+06	240574	601225	661308								181171		197973
Q8NFD5	ARID1B	699501			706926	712246	364071
O15143	ARPC1B	2.308e+06	1.27109e+07
O15144	ARPC2	1.42175e+06	3.03697e+06	2.07518e+06	1.38276e+06	1.58176e+06	744646							885952			3.73772e+06	3.29309e+06	339126
O15145	ARPC3		157901											488645	98042.3
Q6VMQ6	ATF7IP													502465	308970	213832	350993	330818	187995
Q9NT62	ATG3					124103								215334		100030
P31939	ATIC					1.7009e+06	797698							1.22862e+06	485672	60507.8	1.31919e+06	1.74599e+06
Q9Y2G3	ATP11B													183764	172438
O75787	ATP6AP2	230513	593930	245425	295760	277469	130909							198611					91067.1
Q99700	ATXN2	354132	295868	216095	333428	475700	137120							711478					249256
Q8WWM7	ATXN2L	1.67494e+06	3.01866e+06	1.64253e+06	1.65328e+06	1976449	357353							2.01536e+06	1.74049e+06	906522	2.2749e+06	2.41179e+06	1.32997e+06
O95816	BAG2		59063.5	77846.9		306287									268124
O95817	BAG3	664908	238256	102198	750415	1.05301e+06	441660							2.14033e+06	1.34892e+06	989204	1.44225e+06	691016	510585
Q9UIG0	BAZ1B	1.26139e+06		3.20363e+06	2.9301e+06		673765							1.67499e+06		1.0174e+06	2.32703e+06
Q9UIF9	BAZ2A	3.53744e+06	2778697	1.51486e+06	2.625e+06		685294								2.02433e+06	446718	2.22985e+06
P51572	BCAP31													2.29946e+06	968647	556907	7.37333e+06	5.33882e+06
Q9NYF8	BCLAF1	769607	3.37826e+06	2.20542e+06	3.15585e+06	2.55588e+06	627163							4.66729e+06	2.38466e+06	1.3517e+06	7.66936e+06	5.88611e+06	4.32417e+06
O15155	BET1	861436		576304	1.68226e+06	1129908								2.20353e+06	1.42911e+06	1.16465e+06	2.15461e+06	1.21115e+06	1.4598e+06
Q9NYM9	BET1L	533557			399098	720339	249427							806587	601544	393508	561598	579465
Q8NFC6	BOD1L1	1.36167e+06		455049	713243	685243								1269145	1.02753e+06	4.18618e+06	2.54848e+06	898363	16155598
P20290	BTF3	1.49396e+06												1.18664e+06	503610		5.44921e+06	3.66732e+06	929177
Q9Y6E2	BZW2		5.18415e+06		1.50141e+06									1.79973e+06			706446		3.58725e+06
Q9H425	C1orf198	420957	507585	398536		472448	267933							379299	256757	186960	292120	206112
Q9Y426	C2CD2		400326		335714	221049	155999								250387	139262			538082
Q8WUQ7	CACTIN	542984	443899	266291	484035	490598	234418							829429	1.09287e+06	333854	731907	1.41078e+06	999618
Q9HB71	CACYBP	1.57591e+06	4.61549e+06	2.0769e+06	3.15145e+06	1.58111e+06	619970							1112701	1.21723e+06	440645	5.44685e+06	2.73036e+06	282599
Q05682	CALD1	5.50188e+06	2.93263e+06	3.4791e+06	6.18826e+06	8.186e+06	2.75562e+06							1.149e+07	8.07077e+06	3.63366e+06	8.84277e+06	7.68974e+06	1.84115e+06
Q5T5Y3	CAMSAP1	438814	462406	331377	483452	682772	184315							951103
Q01518	CAP1	8.69574e+06	2.05848e+07	1.18051e+07	8.9939e+06	8.10476e+06	3.72009e+06							1.18316e+07	2.96199e+06	2.88987e+06	1.91006e+07	1.75305e+07	1.67888e+07
P40121	CAPG	2.75229e+06	2.90117e+06	1.98583e+06	7.50027e+06	3.07274e+06	3.70513e+06							5.51515e+06	1.49157e+06	1.40075e+06	3.59354e+06	3.53734e+06	1.33351e+06
P20810	CAST		231821	160089	260508	211007	125990							401257	216349	187535	373599		172032
Q13185	CBX3	2.00426e+06	3.33763e+06		4.50225e+06									2.56567e+06	1.37272e+06
Q8N163	CCAR2	3.91791e+06				3.66019e+06	1.07448e+06							4.52838e+06	2.21774e+06	1.78384e+06	9.37222e+06
Q96CT7	CCDC124	208135	273120	207792	255976	229771	150628							736013	421514	257494	771544	590704	228599
Q96A33	CCDC47	174421			1.71191e+06	719448											2.2414e+06		637353
Q8IVM0	CCDC50	80348.4				83946.9	55134.2							91997.6	66730.8
Q16204	CCDC6	593053	642834	512525	664762	644679	358861									312661
O75909	CCNK	1.2703e+06	887406		2.1747e+06	1.39649e+06								756252	710100	406459		934922	936067
O60563	CCNT1	2.76249e+06	3.14838e+06	2.17737e+06	2.90921e+06	3.96288e+06	1.82207e+06							2.67923e+06	2.6085e+06	1.82113e+06	1.50439e+06	1.23202e+06	2.19249e+06
P50990	CCT8	7.195e+06	2.0187e+07	7.44661e+06	6.41496e+06	5.41763e+06	2.00812e+06							7.652e+06	1.49307e+06	1.32768e+06	2.2843e+07	1.80613e+07	9.48222e+06
P86790	CCZ1B	400386				437705	215537							1.21789e+06	636902	510631	919951	530014	319229
Q9Y5K6	CD2AP	1.91883e+07	1.36729e+07	1.13072e+07	1.70906e+07	1.78697e+07	9.6332e+06							2.07813e+07	1.93714e+07	9.98552e+06	1.46878e+07	8.43848e+06	6.0653e+06
P16070	CD44				8.62556e+06	7.15727e+06
Q9UJX2	CDC23	565686				827118	202225							648365
Q96JB5	CDK5RAP3														270320			356311	95330.1
Q9UKY7	CDV3	458587	213808	107273		392868								1.68452e+06	1.69123e+06	786959	1.74303e+06	955587
O94986	CEP152	224630		180273		200888	106265							239083	192094	123966			113132
Q5SW79	CEP170	723075	264212	295251	1.24588e+06	171107	628356							1.89061e+06	1.51072e+06	550996	721964	413565	559678
P23528	CFL1		1.92787e+08	9.49794e+07	7.48038e+07	5.54995e+07								7.40342e+07	3.88706e+07		1.08463e+08		1.49194e+08
Q9P2D1	CHD7	723655												916001	538762	186015	697050		113957
Q9HCK8	CHD8													922078	708566
Q9H444	CHMP4B		151199											270525	205530	117986	909746
Q9NZZ3	CHMP5	283029	243556	286449	290162	545789	424310							2.79573e+06	1.78956e+06	404871	1.27886e+06	628176	765144
Q9UHD1	CHORDC1	1.91219e+06			1.20826e+06	1.35362e+06	888195							2.29532e+06	1.58896e+06	971657	1.42145e+06
Q8N5K1	CISD2													371431	180128		813078	700659
Q07065	CKAP4	6.74935e+06	1.55592e+07	8.88984e+06	5.27155e+06	1.05613e+07	2.93177e+06							1.16959e+07	3.84232e+06	3.41531e+06	3.8238e+07	3.25672e+07	1.05136e+07
Q14008	CKAP5	1.89558e+06	5.93613e+06	660279	2.51696e+06	3.58483e+06	968240							5.98837e+06	5.17178e+06	1.92407e+06	2.9054e+06	1.69799e+06	3.85511e+06
Q7Z460	CLASP1													410624	178988
Q8N2M8	CLASRP		171916	144848	201660	199931								238763	148097	161440	222836		135003
Q14677	CLINT1	2.64422e+06	7.15352e+06	3.25033e+06	3.53196e+06	2.55161e+06	881784							3.65462e+06	1.05805e+06	961979	2.14818e+06	1.97383e+06	5.90834e+06
P30622	CLIP1													560142	222714	150830	336039
P09496	CLTA					954722								926887	872628	541251	4.17707e+06	4.1003e+06
Q99439	CNN2	678530				787131	71828.2							197624	586281	240434
Q9NX08	COMMD8													254893	359304
Q9UBF2	COPG2	1.67623e+07	1.26383e+07	9.45207e+06	1.37636e+07	1.42628e+07	6.70302e+06							2.82871e+07	2.15512e+07	1.4182e+07	2.45523e+07	1.49649e+07	1.15562e+07
Q9BR76	CORO1B		1883464	1.16017e+06	1.29376e+06
Q9ULV4	CORO1C	1.29196e+06	2.29011e+06	1.16195e+06	1.64556e+06	917121	921439							2.9895e+06	2.53445e+06	2.30668e+06
Q9Y4K1	CRYBG1													225515		849211
O75534	CSDE1	1.51955e+06	3.01953e+06	2.8204e+06			74546.9							500664	478461	414134	1.39054e+06	462169	557103
P21291	CSRP1	392149	664182		302240	139113	521145							2.104e+06	611043	1.06261e+06	2.72246e+06	2.49193e+06	532538
P33240	CSTF2					1.14058e+06								803865	1.24333e+06	1.04622e+06	2.1031e+06	2.26943e+06	995072
Q9H0L4	CSTF2T	2.35201e+06	1.23992e+06	1.77598e+06	969718	1.45354e+06	1.19867e+06							3.07744e+06	2885625	2.14565e+06	2394057	1.78629e+06	1.2434e+06
O60716	CTNND1				1.27988e+06	1.26418e+06	141541							1.4709e+06	787664		1.20462e+06	2.24346e+06
Q13620	CUL4B	1.19679e+06	2.7263e+06	1.81503e+06	261417	974319	198040							1.3098e+06	592996		1.19042e+06	365712	1.26719e+06
Q9P013	CWC15	5.0078e+06	5217327	3.7972e+06	5.73478e+06	5.59087e+06	1.70929e+06							5000329	3.19301e+06	2.06272e+06	4.69068e+06	3.18967e+06	1.44757e+06
P51397	DAP	429376	370703	198288	392346	406572	200584							1.76171e+06	390900	1.09468e+06	680210	598645	138990
Q16643	DBN1		1.53378e+06		823240	674507	216213							1.3925e+06	376491	552122	7.03258e+06	3.47494e+06	277169
Q9UJU6	DBNL	486870	672984		832291	1.76781e+06	698103							2.86479e+06	2.85471e+06	2.0729e+06	1.58192e+06	917054	343809
Q13561	DCTN2																256504	229921
Q13206	DDX10	305982												662735		379467
O00571	DDX3X					1.25272e+06								1.94946e+06	283669
Q86XP3	DDX42	1.00066e+07	5.74062e+06		2.44091e+06	1.34498e+06	403826							798197	721737	1.95051e+06
Q7L014	DDX46	1.95916e+07	2.81625e+07	1.44666e+07	2.38856e+07	1.54203e+07	8022546							1.64722e+07	1.18752e+07	7.2491e+06	1.67234e+07	1.48173e+07	1.32286e+07
Q9H2U1	DHX36	490398			1.35731e+06	942330								521248	327837	420872		760401	1.66816e+06
Q6P158	DHX57													647109			187322		532649
Q08211	DHX9	4.98671e+07	1.36782e+08	7.73066e+07	8.0347e+07	4.48645e+07	2.05138e+07							6.87645e+07	3.0567e+07	2.52213e+07	9.49299e+07	1.0976e+08	1.42333e+08
Q9BTC0	DIDO1	1.59418e+06			1.35987e+06	1.4182e+06								1.20734e+06	2.05074e+06	1.45767e+06	2.00269e+06	2.21594e+06	774712
Q9Y2L1	DIS3		2.1839e+06		271626	183053
Q12959	DLG1	1.71328e+06	2.16062e+06		1.77217e+06	2.26394e+06	1.04102e+06							1.21549e+06	997767	753751	1.00805e+06	912760	547116
Q9Y2H0	DLGAP4	225679	197913	168545		163398	105829							525593	513567		338435	294570
P25685	DNAJB1	5.42962e+06	5.73033e+06	5.33386e+06	5.78019e+06	5.90675e+06	2.9728e+06							1.05948e+07	7.97691e+06	4411344	9.28622e+06	7.69881e+06	4.15748e+06
O75165	DNAJC13													375693	273698		556474
O75937	DNAJC8		94973.4											802255	164452
Q6XZF7	DNMBP	1.01325e+06	612751	704257	783195	709782	536936							2.32386e+06	1.54784e+06	906431	1.75766e+06	1.15657e+06	748890
Q96N67	DOCK7	2.12554e+06	3.39871e+06		3.48197e+06	1.12497e+06								2.71155e+06	790172	643241			2497551
O14531	DPYSL4	1.00856e+06	1.03486e+06	657445	1.10449e+06	1.33067e+06	122890							4.49038e+06	2.91285e+06	1.60978e+06			162246
Q14126	DSG2	346892				291674								1.97184e+06	2.20933e+06	2.23711e+06	1.57571e+06	1.76302e+06	531912
O00559	EBAG9		681030	579891		642650	139286
P68104	EEF1A1	2.0744e+08	3.00236e+08	2.66081e+08	2.33792e+08	1.78329e+08	1.03105e+08							2.8141e+08	1.55617e+08	7.55043e+07	4.27412e+08	3.65511e+08	2.35011e+08
Q05639	EEF1A2	4.53629e+07	7.39746e+07	5.2505e+07	4.26102e+07	3.24919e+07	1.73979e+07							3.31018e+07	1.70224e+07	8.66887e+06	5.38315e+07	3.50761e+07	7.43261e+07
P24534	EEF1B2	914204	1.62514e+06		918408		108669							3.38579e+06	1.50743e+06	1.9924e+06	7.25496e+06	2.75526e+06
P29692	EEF1D	2.25723e+07	1.46099e+07	1.19665e+07	1.38472e+07	1.72935e+07	8.06679e+06							5.58848e+06	2.86932e+06	2.83924e+06	1.36573e+07	1.50798e+07	4.20695e+06
P13639	EEF2	1.90833e+07	6.21764e+07	1.78852e+07	1.43682e+07	1.88902e+07	8.51393e+06							2.88309e+07	1.29992e+07	8.68661e+06	7.99959e+07	77808180	2.30234e+07
Q96C19	EFHD2	2.56134e+06	3.63755e+06	1.2904e+06	2.4591e+06	3.84936e+06	91154.5							7.02211e+06	5.56748e+06	3.03174e+06	6.41165e+06	5.66223e+06	3.16799e+06
Q9GZT9	EGLN1			113096										215363	157190
Q8NDI1	EHBP1	223314			251064	266310	151015							467557	393981	229153
Q8N3D4	EHBP1L1		1.96938e+06	262612										210533	368199		384269
O75821	EIF3G	1.95818e+07	6.11669e+07	4.16183e+07	2.93266e+07	1.46825e+07	7.67849e+06							1.70831e+07	7.11007e+06	6.59254e+06	1.57756e+07		3.15281e+07
O15372	EIF3H													1.46934e+07	5.64355e+06	3.88728e+06
P60842	EIF4A1			3.48803e+06	4.7955e+06	6.19857e+06	2.05473e+06							8.66935e+06	4.00623e+06	3.30129e+06	2.65656e+07		6.46698e+06
P23588	EIF4B	1.38604e+06	1.36555e+06	761248	1.11536e+06	1.38038e+06	523732							1.0738e+06	128044	239068	3.30742e+06	2.11915e+06	322321
P06730	EIF4E	1.01953e+06	5.45743e+06	2.42964e+06	1.29311e+06	91734.2	305336							1.11711e+06	260195	405037	242375	1.35547e+06
Q04637	EIF4G1	4.52069e+06	1.04587e+07	3.115e+06	7.26665e+06	8.58905e+06	4.00229e+06							1.18915e+07	8.90346e+06	4.98538e+06	4.29881e+06	1.00715e+07	4.28934e+06
P78344	EIF4G2	8.61652e+06	9.01056e+06		6.82362e+06	5.52734e+06	5.34852e+06							7.04554e+06	5.92614e+06	4.30647e+06	7.85564e+06	4.79009e+06	4.94188e+06
O43432	EIF4G3	209142	336891		235138	805316	319072							651113	564511	189366			136309
Q15056	EIF4H	3.13919e+06	2.58683e+06	1.85244e+06	3.00028e+06	3.20842e+06	834251							3.45355e+06	2.21594e+06	1.84814e+06	5.88374e+06	5.16327e+06	2.14267e+06
P55010	EIF5	1.34583e+07	1.45392e+07	9.51381e+06	1.44077e+07	1.38846e+07	6.66488e+06							2.40193e+07	1.53622e+07	1.01323e+07	1.73088e+07	1.1518e+07	9147593
P50402	EMD	21166.2	1.3282e+06		745933	262049								1.77396e+06	596372	330301	2.90792e+06	2.07608e+06	742042
Q7Z589	EMSY													258363	188039	95527.6
Q8N8S7	ENAH	266098	478373		285763									368465		155449	762700		126520
O43768	ENSA			194165		612441								1.39975e+06	1.30357e+06		1.69576e+06	691185	217518
P11171	EPB41	566347		482598	608680	667411	527854							1.60082e+06	1.42031e+06			1.2718e+06	211519
O43491	EPB41L2	2668441	1319878	1.31741e+06	1.90492e+06	772836								755115		289153		859872	225634
Q9Y2J2	EPB41L3	6.76737e+06	5.66171e+06	4.25582e+06	6.28708e+06	7.0363e+06	4.07544e+06							1.1626e+07	2.59046e+07	5.99098e+06	9.70608e+06	9.27048e+06	6.23316e+06
P07814	EPRS1	2.50738e+06	2.20721e+06	276496		1.92012e+06	528281							2.19329e+06	1.81023e+06	1.49166e+06	5.27136e+06	3.88097e+06
Q8IUD2	ERC1													3.08521e+06	2.68709e+06	1.67822e+06	2.37518e+06	1.09929e+06	1.02081e+06
Q9H501	ESF1	1.02427e+06		550776	995831	1.13694e+06	531103							1.32709e+06	948146	796834	1.05327e+06		594990
Q9BSJ8	ESYT1			375952										513876		76404.4	1.1485e+06		1.22182e+06
A0FGR8	ESYT2			427993			62295.8							218112	338232	578578	517783	394410
Q92817	EVPL													311253	1727188	491404		2.48628e+06	306973
Q96A65	EXOC4		1.47129e+06		240499	134329										156739
P15311	EZR	3.1408e+06	1.71662e+07	9.1028e+06	6.25984e+06	3.92692e+06	832382							4.61927e+06	730397	1.31733e+06	7.96339e+06	7.4781e+06	8.14299e+06
Q9H098	FAM107B					264230								750485	1.06705e+06	221341	757568		165657
Q9ULE4	FAM184B	187092		184975	245716
P49327	FASN	2.13132e+07	4.92543e+07	1.81867e+07	1.76357e+07	1.88049e+07	5.82408e+06							5.58456e+07	4.41813e+07	3.35972e+07	5.16137e+07	3.75229e+07	3.75247e+07
P39748	FEN1						156426							992513	105161	310469	4.57242e+06
P16591	FER	222259				336821	133082								334362	168403	406933	272603
Q9Y613	FHOD1		1.39398e+06	432160	429807	409350								310736					990193
Q6UN15	FIP1L1		698699			668134	309483							374045	293063	168810	98967.9	349074
Q00688	FKBP3	266296	201760											377849		198876	308423		74556.2
O75369	FLNB	1.53437e+07	4.47495e+07	2.27947e+07	2.62867e+07	1.46893e+07	5.73351e+06							1.81456e+07	7.65622e+06	5.6264e+06		2.23784e+07	2.29948e+07
P35637	FUS				316894		171002							2.33794e+06	403568	220461		8.21277e+06
Q13283	G3BP1					1.05795e+06									1.94189e+06	1.60253e+06	7.69563e+06	5.09076e+06
P11413	G6PD	2.36772e+07	1.11646e+08	4.66331e+07	3.32462e+07	2.186e+07	1.08135e+07								6.96095e+06	3.65788e+06		1.59642e+07
Q06546	GABPA	104264	133039		142377														82376.5
O14976	GAK	456529	330406	384479	626786	374849	351882							458017	465677	105230
P04406	GAPDH	2.0907e+08	3.24169e+08			1.4899e+08	6.30682e+07							1.92026e+08	9.03988e+07	7.51869e+07	4.38457e+08
Q14C86	GAPVD1	924636	1.29334e+06	717023	1.11994e+06	1.52552e+06								1.82121e+06	1.34649e+06	794032
Q8WXI9	GATAD2B	609966	630799		465513	786660								793298	546938	423448	530255	643063
Q92616	GCN1													2.74753e+06	940694	1.97695e+06
Q8TEQ6	GEMIN5	5.43329e+06	6.34127e+06	3.30607e+06	946097	5.12854e+06	2.33251e+06							4.23276e+06	2.60208e+06	1.69731e+06	2.64763e+06		1868733
Q06210	GFPT1														414386	126290			1.26017e+06
Q13823	GNL2	453130	3.57283e+06			1.29134e+06											508051		4.92739e+06
Q8NFJ5	GPRC5A													218472	137997
Q7Z2K8	GPRIN1	486465				315580	86024								268064		380856
O60443	GSDME	1.64211e+06	1.68135e+06	1.24781e+06	1.33772e+06	1.95708e+06	869358							3.14266e+06	2.55481e+06	1.70207e+06	2.55389e+06	1.73074e+06	1.38295e+06
Q14687	GSE1			224450	326077		128191
P06396	GSN	225320	542670			921839								716860		149979	361863
Q8IYD1	GSPT2	201006	1.10561e+06		173003	221876	139566							5.42784e+06	191272	2.1172e+06	5.04657e+06	569046	109687
P35269	GTF2F1													285275	180798	193176	371036	577048
P13984	GTF2F2	1.54749e+06	1.12246e+06	460555		1.37969e+06	615309							1.96067e+06	1.331e+06	965477	1.68104e+06	1.04837e+06	696571
P78347	GTF2I													223554		80481.4			205606
Q9Y5Q8	GTF3C5														87317.5	198249
P0C0S5	H2AZ1	1.78891e+06		1.0376e+06	754192	1.00633e+06	7.38077e+07							3.75752e+06	2.10376e+06	1.38536e+06	6742638	7870117	1.97945e+06
Q5QNW6	H2BC18	1.61066e+07	2.96934e+06	3.09145e+06	1.37719e+06	2.0326e+07	5.61644e+06								1.19766e+06	806991	562778		6.64495e+06
Q16778	H2BC21	1.99943e+08	7.04899e+07	2.06839e+07	4.68684e+07	1.71198e+08	8.83323e+07							3.89609e+07	1.50119e+08	1.31109e+08	5.05435e+07	5.20107e+07	7.56882e+07
Q8N257	H2BC26		1.46755e+06	928493			281772							1.71342e+06	804761				1.01925e+06
P58876	H2BC5		2.13346e+08	1.43301e+08										3.54704e+08	1.1215e+07	3.94638e+06		7.0933e+08	2.55185e+08
P84243	H3-3A, H3-3B	8.93791e+07													5.56073e+07		3.55504e+08	3.18487e+08	239969
Q5TEC6	H3-7	2.18978e+06	165747	618900	683407	1.79157e+06	451429							2.97984e+06	1.50751e+06		9.7802e+06	7.68108e+06	1.03106e+06
P68431	H3C1, H3C2, H3C3, H3C4, H3C6, H3C7, H3C8, H3C10, H3C11, H3C12		1.15955e+08	4.03366e+07	5.5608e+07									131639662
Q71DI3	H3C13, H3C14, H3C15					5.60085e+07	2.69323e+07									3.05918e+07			5.49062e+07
P62805	H4C1, H4C2, H4C3, H4C4, H4C5, H4C6, H4C7, H4C8, H4C9, H4C10, H4C11, H4C12, H4C13, H4C14, H4C15, H4C16	1.59891e+08	2.56061e+08	1.19863e+08	1.39045e+08	1.55399e+08	5.72743e+07							3.04221e+08	1.33657e+08		6.87771e+08		2.64833e+08
P51610	HCFC1	4.59595e+06	5.01086e+06	2.45745e+06	6.08795e+06	7.20953e+06	1.85741e+06							6.39225e+06	7.86594e+06	5.01412e+06	6.95593e+06	3.38551e+06	2.64566e+06
P51858	HDGF			5.89735e+07		3.6056e+07								4.24772e+07	1.69479e+07		3.77583e+07	4.35562e+07
Q7Z4V5	HDGFL2	3.45643e+06	1.12285e+07	5225272	5.30276e+06	3.2586e+06	1.40378e+06
Q00341	HDLBP	113472	553797
Q5GLZ8	HERC4		1.42306e+06	652751	718604	311966								790132		168934	610221	691200
O14964	HGS	946085	6.47818e+06		3.60562e+06		114496							1.39253e+06	281766	465858	2453756	1.87422e+06	5637761
P49773	HINT1	2.11307e+07	4.16439e+07	2.25396e+07	2.54624e+07	1.58366e+07	7.34517e+06							1.82058e+07	1.167e+07	7.24593e+06	2.23764e+07	1.62976e+07	2.19316e+07
P15822	HIVEP1	2.11655e+06			1.76312e+06	1534886	921928							3919267	4.80847e+06	2.37476e+06	3.59513e+06	2636886
P50747	HLCS					472229	292494							917924		537379		399157
P17096	HMGA1	2.39827e+06	2.44576e+06		984967		1.05439e+06							5.20312e+06	3.98697e+06	2.28727e+06	1.43524e+07		4.85284e+06
O15347	HMGB3	8.27291e+06	2.84683e+07	1.39054e+07	2.32545e+07	1.20936e+07	2.74544e+06							1.02089e+07	2.8987e+06
P09651	HNRNPA1	4.99769e+07	1.03796e+08	4.39084e+07	6.07548e+07	4.87172e+07	2.06155e+07							7.39644e+07	2.75488e+07	2.09085e+07	1.16193e+08	1.50521e+08	8.46014e+07
P07910	HNRNPC		6.29452e+07	3.33041e+07											1.67341e+07
P52597	HNRNPF	2.04976e+06	1.90246e+06	702974	811135	2.76947e+06	372737							4.30832e+06	1.68897e+06	1.71727e+06	7.74189e+06	7.28148e+06	6.92622e+06
Q00839	HNRNPU	5.35375e+07	7.75582e+07	3.11865e+07	3.35973e+07	2.6393e+07	2.30255e+07							7.88147e+07	4.55112e+07	5.1043e+07	1.23448e+08	1.19407e+08	5.63436e+07
Q9BUJ2	HNRNPUL1		322158		574727	220493								750287	423672	280281	1.83682e+06	1.89681e+06	823270
Q1KMD3	HNRNPUL2		625227	378902	334158	618092	151762							643641	407809	274930		1.39899e+06	455706
Q5SSJ5	HP1BP3		112282		1.02769e+06									2.98515e+06	2.08638e+06	3.85139e+06	3.21661e+06	2.86644e+06
Q00613	HSF1													341631	237978	186497	321291		130528
P07900	HSP90AA1	1.16472e+07	1.62714e+07	1.20556e+07	8.05672e+06	8.55873e+06	5.12292e+06							1.93163e+07	10480312	1.94874e+07	4.63721e+07	3.54251e+07	1.57736e+07
P08238	HSP90AB1	5.49616e+07	6.32362e+07	4.55842e+07	3.11838e+07	4.76379e+07	2.67526e+07							6.65503e+07	3.11832e+07	1.24815e+07	1.4456e+08	1.48847e+08	5.53064e+07
P0DMV9	HSPA1B	1.32325e+06	4.65968e+06	1.2091e+06	1.1162e+06	1.60144e+06	596255							4.58825e+06	416162	678244	1.18062e+07	8.18736e+06	1.45217e+06
P11142	HSPA8	5.45519e+07	7.02824e+07	4.94495e+07	3.57884e+07	4.64839e+07	3.23892e+07							7.78405e+07	4.3629e+07	3.46261e+07	2.2324e+08	1.85483e+08	5.98439e+07
Q92598	HSPH1		772893	648081	309383		154002							754239			2.19549e+06	1.22253e+06
Q16666	IFI16	1.4663e+07	3.50491e+07		2.30736e+07	1.21831e+07	4.27153e+06							1.30294e+07	4.76053e+06	2.52545e+06	1.45363e+07		1.72724e+07
O00425	IGF2BP3													226265	629264	564121	1.15049e+06
P11717	IGF2R	292270												785367	502626	602000	738731	863103	1.21757e+06
Q13123	IK													39946.1	591577	758686
Q9Y2H2	INPP5F													1.99061e+06	1.36068e+06	924587	1.67935e+06	1.03093e+06	705637
Q96P70	IPO9															158074		946942	1.4963e+06
P05556	ITGB1													1.64401e+06	582788	276448	6.20978e+06	2.66672e+06
Q96ST2	IWS1	197998												524470	314324	198776	459618	308460
Q15652	JMJD1C	561942			317948	446627	175299							733482	1.02715e+06	498481	607062
Q9UK76	JPT1													439569	712027	153448	1.73553e+06	846860	105453
Q9H910	JPT2		222868	263561	740278	464591	279149							1.90144e+06	1.20943e+06		576895	387217	229508
Q92945	KHSRP	1.75528e+06	2.64599e+06	1.1308e+06	1.14315e+06	1.87444e+06	80891.4							2.99153e+06	543050	535233	1.00965e+07	8.93011e+06	1.15093e+06
Q9NS87	KIF15	184588												290806		168481
Q96Q89	KIF20B	657522				609287	142329							3.2975e+06	1.98203e+06	1.67219e+06	1.67855e+06	2.60763e+06	809592
P33176	KIF5B				459407									1.15247e+06	335821		1.16504e+06
Q9UMN6	KMT2B	594892													626279	413124
Q8NG31	KNL1						101521							1.29968e+06	525344	431490	955776	704031
P05783	KRT18	597913			203047	275263									293613	145804	381664	699790	177115
Q16719	KYNU		9.0816e+06		9.24095e+06		660954							934638	1.30679e+06		3.55899e+06		7.55499e+06
Q6PKG0	LARP1	550317	736180	473157	311621	1.30266e+06	199351							1.62132e+06	815309	233756	1.4959e+06	660870	1.20232e+06
Q14847	LASP1	998511	87692.9	485709		886326	509554							1.93803e+06	1.22014e+06	793655	3.50662e+06	2.41579e+06	541404
Q14739	LBR	862124	8.34556e+06		1.77052e+06	1.92442e+06	1.00121e+06							1.74793e+06			2.89653e+06	2.61713e+06
Q9UHB6	LIMA1	9.3778e+06	1.77209e+07	7.97712e+06	1.31315e+07	1.23611e+07	4.88445e+06							2.86825e+07	1.88649e+07	1.24118e+07	2.73629e+07	2.71282e+07	1.50417e+07
Q9UPQ0	LIMCH1	1.79885e+06	983973	1444374	1.94809e+06	1.46461e+06	831125							235615	163212
Q8WWI1	LMO7	671383	5.17793e+06			835242								1.0643e+06	1.04837e+06	139652
Q93052	LPP	328698				314571	190418
P50851	LRBA	1.48774e+06	1.38276e+06	1.2303e+06	1.43242e+06	1.65839e+06	767276							2.17321e+06	1.99909e+06	1.29594e+06	1.85575e+06	1.93444e+06	904578
Q32MZ4	LRRFIP1	2.19434e+06	2.61512e+06	2.78717e+06	1.9545e+06	2.58626e+06	2.26848e+06							2.90862e+06	2.70762e+06	1.89973e+06	2.28338e+06	2.46763e+06	1.36629e+06
Q3MHD2	LSM12	151703				158112								216526	191433			139122
Q8ND56	LSM14A		83069.2			130324								259016	104465
Q86V48	LUZP1		260539	278005	376701	335844	172171							424011	1.56273e+06		647421	355349	233751
Q9UPN3	MACF1	507136												1.89774e+06	1.97938e+06	1.19919e+06	1.35388e+06	818862	713273
Q9Y5V3	MAGED1	455330	493592		516264		265076							395087	303874	213348			181102
Q9UNF1	MAGED2													394987		74828
P78559	MAP1A	417696				258736	372836							2.49175e+06	2.16309e+06	1.10076e+06	1.34606e+06	382145	479686
P46821	MAP1B	246309				281136								1.81867e+06	1.48102e+06	1.12523e+06	1.05091e+06	408928	40784.3
P27816	MAP4	2.89632e+06	3.14059e+06	1.46426e+06	2.20492e+06	2.8197e+06	1.04266e+06							4.08513e+06	2.40492e+06	1.56237e+06	5.4421e+06	4.98249e+06	1.76116e+06
O95819	MAP4K4					482363								136750	323868
Q15555	MAPRE2	1.33373e+06			1.04465e+06	1.09361e+06								2.12139e+06	1.6574e+06	1.21382e+06	1.82284e+06
Q7Z434	MAVS			440074	298317	45655.3									279899		167146
P55081	MFAP1	1678862	1.7345e+06	1.36845e+06	1.58294e+06	1872646	753078							1.28723e+06	1.16115e+06	741356	1.09209e+06	1.06766e+06	518126
Q16674	MIA	742771			860856	641898	402902							1.38829e+06		950017			700856
P46013	MKI67													84449.8			76203.1	646523
P40692	MLH1													282571	138412				1.05745e+06
Q6WCQ1	MPRIP	1.11478e+06												2.86948e+06	820900	292913
P26038	MSN	1.06658e+07	1.5892e+07		1.04507e+07	1.56366e+07	3.88632e+06							1.59454e+07		4.86063e+06	3.50675e+07	3.37776e+07	2.16174e+07
Q13330	MTA1		658869	505780	667546	687200	323393								315799	237630
Q86UE4	MTDH	901481			156389	122215	53641.6							548064	661274	418703	3.3032e+06	748518	210698
Q9ULD2	MTUS1		437392	401548	503324	535602								674676	549463		545543	412784
Q14764	MVP	2.69387e+06	4.35215e+06		397178	1.5647e+06	1.11281e+06							2.70513e+06	1.181e+06	588917	3.38705e+06	5.1464e+06	1.46796e+06
Q9UKX3	MYH13	732880	424481				279961							8.54778e+06
P35579	MYH9	5.9579e+07	1.63325e+08	8.26888e+07	8.05831e+07	5.18634e+07	2.01884e+07							7.34435e+07	3.04668e+07	3.32264e+07	1.28001e+08	1.10457e+08	1.4692e+08
O14950	MYL12B													697786	375505
O43795	MYO1B	874509	4.35757e+06		2.19917e+06	421071	85017.6							941376	576452			3.52256e+06	5.0475e+06
P41227	NAA10	1.25236e+06	4.8988e+06	2.89615e+06	2.00439e+06	1.77195e+06	670059								472684		1.50272e+06	792293
Q96RE7	NACC1				495616	430547
Q99733	NAP1L4	784467	833910	613640	815074	1.11225e+06	399023							350697	554621	2.35232e+06	2.18041e+06	1.79528e+06	635294
P49321	NASP													829216	180825
Q14596	NBR1					178233									320741	236769	427982	338121
Q9BPX3	NCAPG	183705	2.73081e+06	791899	374500									177269		415995	633057		3.48698e+06
Q15003	NCAPH		365245		395295		211233								427030	191076	848936	459334	136375
O43639	NCK2	1.58711e+06		1.44681e+06		1.90995e+06	938617							1.77792e+06	1.18379e+06	939613		787062	473055
P19338	NCL	2.70421e+07	4.65745e+07	28271420	2.45805e+07	3.04373e+07	1.09066e+07							3.42851e+07	1.66026e+07	9.70944e+06	7.6352e+07	6.75963e+07	2.79208e+07
Q9Y618	NCOR2	362267				264828	757980							417990		181769
Q96PU5	NEDD4L													445182	324956
Q15843	NEDD8					36749779								3.28705e+07		19789971	3.53881e+07
P18615	NELFE	669584				661129									425608	428005			283321
Q8NBF2	NHLRC2	540421	692628		590181	549007								1.10636e+06	1.01933e+06		1.77772e+06	659744	527514
Q6ZUT1	NKAPD1					299918								405900	442371	245704
P22392	NME2	1.7653e+06	2.61726e+07		11001794	1.5493e+07	7.91259e+06							5.77701e+06	1.05829e+07	8.99496e+06	5.08423e+07	1.15665e+07	2.38603e+06
P30419	NMT1	6072381													2.78133e+06	1.50472e+06	5.08962e+06	4413839
Q9H8H0	NOL11	385024	8.22364e+06	2.41613e+06	2.49253e+06	1.05787e+06	727615							1891235	353073	1.02166e+06	1.6072e+06	2.20293e+06	6.20178e+06
Q14978	NOLC1	685262	1.12381e+06			881285
Q15233	NONO	2.03644e+07	2.83473e+07	2.27989e+07	1.47829e+07	3.04465e+07	2.26199e+07							2.67068e+07	2.5913e+07	3.19961e+07	4.06034e+07	3.1958e+07	2.05412e+07
Q9Y2X3	NOP58	1.83626e+06	8.3812e+06	4.07927e+06	4.78731e+06	2.88464e+06	1288424							1226280	926700	702806
P06748	NPM1	3.73524e+07	4.63818e+07	3.08087e+07	2.44859e+07	4.10887e+07	1.67868e+07							5.68803e+07	3.05621e+07	2.75031e+07	1.55855e+08	1.2495e+08	4.68083e+07
Q9UHY1	NRBP1													244540	167595
Q9UNZ2	NSFL1C	216740		135347	158712										177725	113795
Q9H1E3	NUCKS1	850792	1.34992e+06	1.6022e+06	1.29629e+06	2.23467e+06	1.01691e+06							1.30627e+06	1.54958e+06	1.12504e+06	4.65798e+06	2.70718e+06	1.58511e+06
Q9Y266	NUDC	3.0669e+06	2.27002e+06	50694.8	1.27798e+06	3.06944e+06	980132							6.71021e+06	3.5379e+06	2.88273e+06	8.38731e+06	8.03627e+06	1.81352e+06
Q8IVD9	NUDCD3	920461	473393		791761	691498
O43809	NUDT21	6.72461e+06		1.48536e+07		1.11422e+07										3.17343e+06	1.19039e+07
Q9UKK9	NUDT5	680856	767222		961235	1.23404e+06								1.05446e+06	727499		1.23651e+06
Q7Z417	NUFIP2	722344	803885	609933	683867	655016	167970							178485	467557	183870		186752	157645
Q14980	NUMA1	4.13437e+06	5.90294e+06	3.47389e+06	4.09607e+06	4.29205e+06	1735756							4.5265e+06	2.93682e+06	1.91426e+06	6.58486e+06	5.68028e+06	5.8307e+06
P35658	NUP214	492655			426524	655497								1488993	1.17657e+06	234861	1.4442e+06	1.06482e+06	1.18088e+06
Q9UKX7	NUP50		230317	146240		985049								1.33335e+06	1.18175e+06		991483	1.51731e+06
P52948	NUP98		1.07823e+07		2634139	2.25442e+06	970161							2.01208e+06		1.21647e+06	2.09548e+06	3.31372e+06
Q9BXB4	OSBPL11						158574							352246	196717
Q9BZF1	OSBPL8	283194	3.01614e+06		297308	723059	142979							1.81424e+06	1.00187e+06	511249	1.42809e+06	1.57613e+06	4.13875e+06
Q9UQ80	PA2G4		2.62899e+06			1.70978e+06								2.55745e+06	1.11797e+06		8.0722e+06
P11940	PABPC1	4.78482e+06	1.41002e+07	5.63638e+06	4.40659e+06	5.47855e+06	2.18906e+06							6.1719e+06			2.23521e+07		7.54277e+06
Q86U42	PABPN1			207405													1.23124e+06	502298
Q8N7H5	PAF1					174642	82221.7							150624
P22234	PAICS	797908	3.15651e+06			1.28588e+06								1.14272e+06	211609	81936.5	3.68866e+06
Q13177	PAK2		1.16201e+06	840097	436409	1.33406e+06	414521							614099		375412	167462
O96013	PAK4													454976	185544
Q9Y2D5	PALM2AKAP2	273498	536681	746891	756875	965005	499972							7.51297e+06	4.98359e+06	3.57746e+06	7.02685e+06	3.91557e+06	3.37505e+06
Q9NVD7	PARVA		1.2789e+06											1.01825e+06	293856		473322		292137
Q15365	PCBP1	1.7146e+07				1.4245e+07	4.93027e+06										2.41924e+07
Q15366	PCBP2		2.66733e+07	1.58949e+07	1.47696e+07	1.4034e+07	8.1087e+06							1.43693e+07	8.18279e+06			2.18158e+07
O94913	PCF11					238914	120084								166270
Q8WW12	PCNP	395509	1.53978e+06	789366	1.73586e+06	1.48637e+06	505371							2.36325e+06	696413	1.02453e+06	1.48753e+06	842485	770893
Q13442	PDAP1	4.36082e+06	5.55956e+06	1.65679e+06	4.40322e+06	4.22527e+06	1.87883e+06							7.00752e+06	7.26268e+06	1.928e+06	7.20728e+06	5.32955e+06	1.70949e+06
O14737	PDCD5		89621.4											69120.5		102449	479280
O00151	PDLIM1	1.65193e+06	972597		796513	1.97473e+06	305622							2.43313e+06	2.3052e+06	1.06532e+06	1.79673e+06	1.48927e+06	429322
P50479	PDLIM4	6842398	3.92715e+06	3.06851e+06	3.85315e+06	6.54336e+06	2837645							1.03864e+07	6.04063e+06		1.2956e+07	9515140	4624906
Q96HC4	PDLIM5	1.82209e+06	4.17898e+06	2.11646e+06	3.04811e+06	4.06574e+06	887201							6.53452e+06	4.19902e+06	3.08944e+06	5.83575e+06	4.04598e+06	3.47514e+06
Q9NR12	PDLIM7	598613		944229	1.15835e+06	470654	192039							1.35328e+06	596417	508965	1.73151e+06	711722
O00541	PES1	3.60003e+06			8.51545e+06	4.69151e+06								7.112e+06	3.08328e+06	1.63626e+06
O75381	PEX14	294584			394758	415672	194079
Q01813	PFKP	861782	2.12426e+06	1.08397e+06	693068	589006	415464							1.49213e+06	694594	76316.3	4.23951e+06	3.76457e+06	578293
P07737	PFN1	1.61172e+07	4.03553e+07	2.11974e+07	2.59396e+07	1.67978e+07	6.94727e+06							2.17887e+07	1.25057e+07	8.7891e+06	2.80265e+07	2.92185e+07	2.12736e+07
P18669	PGAM1		1.39829e+07	6.38736e+06	9.74059e+06		2.42983e+06							3.10003e+06	2.25168e+06	2.39911e+06	1.32829e+07	1.12365e+07	5.4258e+06
O15173	PGRMC2	4.36398e+06	5.87337e+06	2.56336e+06	2060986	6.0684e+06	185653							8.89477e+06	2232594	3.68122e+06	1.02818e+07	5.80274e+06	4.31969e+06
Q8TBX8	PIP4K2C	175878	957894	972718	213403	235173	550895							1.97492e+06	1.3846e+06	1.57593e+06	941185	958261	996261
P14618	PKM	2.50293e+08	6.69469e+08		4.78341e+08	2.20647e+08	1.0142e+08							3.36905e+08	1.48469e+08	1.11153e+08	4.54435e+08		5.27385e+08
P47712	PLA2G4A	5.58445e+06	5.42593e+06	1.68243e+06	5.84054e+06	3.50696e+06	1.4522e+06							6.2593e+06	5.43829e+06	3.3781e+06	4.40237e+06	6.14648e+06	9.09915e+06
Q9HB21	PLEKHA1	400453	505612	303101		493331	219098							887479	570399		558875	657587	396672
O60664	PLIN3	5.04097e+06	4.49507e+06	1.05392e+06	815844	4.47532e+06	2.26845e+06							9.88545e+06	5.213e+06	6.13846e+06	1.00651e+07	3.91613e+06	3.67771e+06
P13797	PLS3	998903	4.96098e+06	2.28834e+06	1.10698e+06	863985	504826							1.09375e+06	323868	128514	1.21396e+06	880725	2.51492e+06
Q8TF01	PNISR	1.23706e+06	1.25233e+06	950512	1.02855e+06	1224311	548286							1.17982e+06	1.18484e+06	622554	1.20322e+06	1.14894e+06	566780
Q9H307	PNN	4.72815e+06	5.16969e+06	3.3137e+06	6.95653e+06	6.00036e+06								1.91567e+07	1.48638e+07	1.06407e+07	2.31985e+07	1.71575e+07	1.14427e+07
O43314	PPIP5K2	296430			305507	510195	244542								278318	291423
Q9Y570	PPME1	909668	722097			1.03763e+06	444376							1.77516e+06	1.5006e+06	745846	1.23944e+06	1.06495e+06	399244
P62140	PPP1CB					3.03518e+06								2.86228e+06		1.1612e+06			1.04112e+07
Q96QC0	PPP1R10	481796				1.05952e+06	570525							2.52101e+06	906098	1.25796e+06	2.36062e+06	1184634	410773
Q6NYC8	PPP1R18	183645		117984	173015	172696	78312.5							434826	255595		607163	247408	178342
O75864	PPP1R37	1.02198e+06	1124048	140797	942711	1.31505e+06	530773								550883		1172544	757390	575755
Q6IN85	PPP4R3A	155807	191070		187251		78182.4
Q06830	PRDX1	34899551	5.96938e+07	3.40414e+07	4.38032e+07	2.87586e+07	1.19655e+07							4.66976e+07	1.69154e+07	1.48057e+07	7.14352e+07		3.51644e+07
P49643	PRIM2													178125	144091
O43395	PRPF3	726074			589402	2.67953e+06	1.56175e+06							3.37607e+06	493731	1.09778e+06	674133	1.67493e+06	2.30536e+06
P48634	PRRC2A	446996	616669	376872	428947	844107	338108							929821	707253	465374	1.05677e+06	374292	210269
Q9Y520	PRRC2C	559060	679270	365475	271227	212551								1.02672e+06	1.71248e+06	448226	986374	1.09265e+06	388931
Q99460	PSMD1	7.64128e+06	3.55962e+07	1.43865e+07	1.37151e+07	7.62534e+06								7.49114e+06	3.7698e+06	3.80071e+06	1.06306e+07	1.16846e+07	2.42366e+07
O00232	PSMD12		2.88113e+07		1.18995e+07	7.42625e+06	2.30137e+06							8.10644e+06	3.22939e+06	956670	8.10787e+06	9.69184e+06	9.11399e+06
Q13200	PSMD2					8.50201e+06	1.65777e+06							8.74586e+06	1.93522e+06	2.81673e+06	1.01859e+07
P48556	PSMD8	2.15851e+06	4.28567e+06	3.24051e+06	4.37331e+06	2.75281e+06	1.23925e+06							5.10955e+06	3.25108e+06	2.54745e+06	4.33104e+06	4.00505e+06	3.44373e+06
Q8WXF1	PSPC1	656524	963607	710771	1.01353e+06	1.07796e+06	464212							216963	154765	760592	837593		555756
P06454	PTMA	1.7265e+06		183480		1.20154e+06	345719							2.3399e+06	1.32616e+06		6.98579e+06
P18031	PTPN1		236125	151338	266939	168501	86404.1								513018	346730	1.71555e+06	1.22795e+06	2.0995e+06
Q06124	PTPN11														197796	256416	2.09199e+06		3.35898e+06
Q05209	PTPN12		300678		283151	186315	185066							1.18516e+06	794473	319510			250587
Q9UHX1	PUF60	2.79111e+06	3.47365e+06	1.94593e+06	2.38245e+06	4.04218e+06	1.41777e+06							3.605e+06	2.47788e+06	1.55559e+06	4.2458e+06	3.88358e+06	1.45102e+06
Q96PZ0	PUS7	377863	2.75238e+06	923103	918083	286625								506442	536290	289467	391112	457045	1.45274e+06
Q9BXF6	RAB11FIP5	719126	2.13856e+06	1.08363e+06	1.78214e+06	1.18801e+06	205891							876264	1.32576e+06	578543	465603	643767	1.19317e+06
P62820	RAB1A													8.19197e+06	3.71458e+06
Q15042	RAB3GAP1	277470				293964	139621							1.3418e+06	316492	235940
Q5HYI8	RABL3	1.08778e+06	3.82316e+06	1161758	1.33536e+06	527970	418619							837759	684154	666241	925939	1.68552e+06	1.97335e+06
Q9P0K7	RAI14	6.38603e+06	6.08477e+06	4.14e+06	5.86689e+06	6.91704e+06	2.50363e+06							3.03352e+07	2.24903e+07	9.64869e+06	2.33163e+07	1.83858e+07	7.48759e+06
Q9UKM9	RALY				354761		680254
P62826	RAN					1.28964e+07								1.64667e+07	9.98577e+06		2.46017e+07
P43487	RANBP1	231306				184797								271649	170531			617075
P49792	RANBP2	6.37058e+06	2.68908e+07		9.21826e+06	5.31936e+06	1.92583e+06							7.06749e+06	3.60333e+06	9.43006e+06	9.8457e+06	3.09822e+07	2.32459e+07
Q9H6Z4	RANBP3	858788	367207		602037	1.83821e+06	340927							868422	693962	445077	898487	320689	298136
P46060	RANGAP1	211554	899246	163350	1.18042e+06	1.38522e+06	528603							3.46659e+06	1.96128e+06	1.47782e+06	5.0996e+06	1.67713e+06	1.01595e+06
P54136	RARS1	6.90742e+06	1.96576e+07	9.98927e+06	9.33094e+06	7.35147e+06	2.66389e+06							1.36124e+07	7.93601e+06	5.25601e+06	1.51522e+07	1.27401e+07	1.23554e+07
P98175	RBM10	7.20682e+06	2.94581e+06	1.64406e+06	4.97364e+06	3.04336e+06	2.51985e+06							8.84635e+06	5.82129e+06	3.90974e+06	7.10711e+06	2.44989e+06	2.45788e+06
Q96I25	RBM17	156683	144812			493798	64020								117093	108289
Q5T8P6	RBM26	1.32056e+06			1.11906e+06	1.29144e+06	510846							1.37994e+06	1.07308e+06			975355
Q96EV2	RBM33	959101			637843	591560	274452							513097	284012		460211		230484
Q14498	RBM39	2.15671e+06	1.06532e+07	5.53272e+06										3.34376e+06	1.85026e+06			3.7529e+06
Q9P258	RCC2	3.08364e+06	1.1153e+07		2.85021e+06	2.70298e+06								3.89412e+06	194097	75753.5	2.7659e+06		7134867
P35241	RDX		4.43487e+06		1.98714e+06	1.52776e+06	1.03094e+06							1.24936e+06		554137	606517	1.06958e+06	2620503
Q96D71	REPS1	427993	333943	222582	363537		182304							544140	438788	322712	476654	267330	293898
A6NLU0	RFPL4A					307099								651753	499607		550079	415484
Q9NPQ8	RIC8A														768603	1.44249e+06
O43353	RIPK2													781515	254105
Q13129	RLF	195878	206994	179485	229567	243801	105283							266837	202516
Q63HN8	RNF213	1.12153e+06	1.7305e+06	525951	857642	800848	528630									1223966	427540		463269
Q15287	RNPS1		97810.6			51535	35633.2
Q8TA86	RP9	1.54986e+06	1.17481e+06	808728	842175	1.11043e+06								2.27939e+06	2.01888e+06	1.16665e+06	1847620	1.8758e+06	1.1878e+06
P27694	RPA1	2.24343e+06	4.52666e+06	1493976	1.78816e+06	2.30994e+06	939034							3.05256e+06	1139040	1.17858e+06	5.87273e+06	4.39712e+06	2.13996e+06
Q9BWH6	RPAP1	166884				120309	82867.4							128230
P84098	RPL19	1.13624e+07	2.32439e+07	1.23499e+07	1.31366e+07	1.75511e+07	9.0032e+06							1.2983e+07	8.93141e+06	9.5061e+06	2.29362e+07		1.2529e+07
P83731	RPL24	4.91969e+06	1.30016e+07	6.43614e+06	8.48523e+06	3.33108e+06	1.33603e+06							9.1947e+06	2.49854e+06	2.59374e+06	1.2792e+07	1.16336e+07	7.6583e+06
P36578	RPL4		1.94094e+07	1.22757e+07		8.92615e+06
Q02878	RPL6	2.57099e+07	4.98886e+07	3.07801e+07	3.57208e+07	2.46741e+07								2.95032e+07	1.16217e+07
P15880	RPS2	2.3462e+07	2.53111e+07	1.3626e+07	3.52945e+07	2.03064e+07	8.40827e+06							2.2103e+07	1.15585e+07	7.76502e+06	4.80324e+07	3.14465e+07	1.75332e+07
P60866	RPS20	5.56008e+06	7.30789e+06	2.06164e+06	3.64526e+06	4.33495e+06	1.48064e+06							8.5409e+06	3.82011e+06	722806	2.29814e+07	1.75215e+07	6.36355e+06
P61247	RPS3A	1.07607e+07	1.12433e+07	7.89784e+06	5.803e+06	1.07136e+07	3.43923e+06							1.76851e+07	8.12082e+06	5.64297e+06	4.01827e+07	3.9699e+07	9.44343e+06
Q9P2E9	RRBP1	1.2483e+06				1.21756e+06								2.44584e+06	718604				1.17921e+06
Q15050	RRS1	159263			139043	325805	91368.7							132930
Q96T23	RSF1			249869	286131	254665								261682
Q96T51	RUFY1	160692	1.70059e+06	539164	611249		459152							2.11194e+06		738845	871270	503282	359672
Q9Y265	RUVBL1	4.60241e+06	1.0137e+07	5.82417e+06	5151030	4.73055e+06	2.27641e+06							3.69974e+06	2.04576e+06	1.12832e+06	5.88669e+06	5.56837e+06	3.55881e+06
P31949	S100A11	2.47291e+06	6.24711e+06	3.02381e+06	3.17154e+06	2.4718e+06	917718							3.3664e+06	1.67601e+06	2.03876e+06	5.84252e+06	5.87395e+06	2.99244e+06
P06703	S100A6	1.02722e+06	240634	345403	265293	1.38259e+06	546214							1.93671e+06	4.06156e+06	1.72016e+06	4.79086e+06	4.9324e+06	773582
Q15424	SAFB	923848	1.21184e+06	1.03875e+06	1.00833e+06	1.77238e+06	797349							1.69836e+06	441277		4.51755e+06	1.86018e+06	742906
Q14151	SAFB2		228591			86815.4	88231.4							143412				2.38061e+06
Q5K651	SAMD9	2.14562e+06	2.81952e+06	191514	1692990	1.23019e+06	487248								1.01361e+06	557578
Q9H0E3	SAP130	343253				288078	130771							675831	587432	379650	428226	301674	244925
Q9UHR5	SAP30BP	8.0658e+06	7.32202e+06	5.95364e+06	8.02715e+06	8.53853e+06	4.27458e+06							1.61079e+07	1.28532e+07	9.88184e+06	1.33642e+07	1.11351e+07	8.67551e+06
O43290	SART1	572446	563418		701374	585219								54083.5		430284		174187
Q15020	SART3	1.07369e+06				1.07268e+06								1.06317e+06	724215				55327.7
Q9UQR0	SCML2	1.24307e+06			417900	972784								1.15293e+06	1.03073e+06	271952
O00560	SDCBP		729666		654682	330382								1.34187e+06	397606		274217		885697
P60468	SEC61B		4.00632e+06	2.15141e+06	472485	684947	327930							2144820	871040	172041	3.37475e+06	1.96592e+06	3.43226e+06
Q15019	SEPTIN2													1.01432e+07	3.5723e+06
Q9UHD8	SEPTIN9	1.25805e+06	834686	591666	1.3467e+06	1.116e+06	404018							2.14279e+06	1.20237e+06	1.15891e+06	5.1226e+06	1.99715e+06	1.28431e+06
Q8NC51	SERBP1	9.39152e+06	7.18525e+06	5.88148e+06	7.81775e+06	8.04988e+06	1.35293e+06							1.31797e+07	9.56638e+06	5.95603e+06	2.06507e+07	1.67353e+07	5.37257e+06
Q01105	SET	935267	513616															1.3846e+06
Q15459	SF3A1	503105	3.46301e+06	396623	243102	752786	165770							2.02858e+06	1.20437e+06	876388	4.56453e+06	3.60598e+06	3.27974e+06
Q13435	SF3B2	4.99319e+06	1.04673e+06	1.1076e+06	3.69336e+06	4.06007e+06	1.11799e+06							1.43944e+07	6.03688e+06	3.26717e+06	1.64755e+07	6.84557e+06	2.20883e+06
P23246	SFPQ	4.2569e+06		3.82655e+06	4.06885e+06	1.0441e+07								8.19456e+06	4.62861e+06	4.34472e+06
P78314	SH3BP2				278012		138432
Q5HYK7	SH3D19	452028				402880	337051							936838	741996	678966	915858
Q99961	SH3GL1	471375	364949	760512		880477	437296							997809	558749	290968	961141	1.02037e+06
A1X283	SH3PXD2B	911339	980833		1.19391e+06	850575								1.5645e+06	1036888	1.28156e+06	747873	663218	684122
P29353	SHC1	782064	1.08911e+06	529556	1002274	772673	434084							1.67184e+06			1.51609e+06	908667	921231
O75182	SIN3B	2.84963e+06	3.05328e+06		2200645	3297743	1.01269e+06							4.04445e+06	2052860	2.25833e+06	3.11792e+06	3.10747e+06	1.8849e+06
Q9P2F8	SIPA1L2	1.23501e+06	2.14878e+06	1.06331e+06	1.52153e+06									2381693	266722	388318	640221	1.20391e+06	2.34398e+06
Q8IX90	SKA3													247009	165459				120495
Q9P270	SLAIN2													1.28523e+06	694244	362071	947939	609347	267209
P08195	SLC3A2				1.21813e+07	7.40167e+06
Q9NWH9	SLTM	320694	222732			313239	169207							319361	384560	208056			63660.5
O00193	SMAP	4.32947e+06	4.17848e+06	3.78888e+06	4.7817e+06	4.58571e+06	2.62634e+06							5.0904e+06	3.14625e+06	2.31158e+06	4.29672e+06	3.13203e+06	2.38982e+06
P28370	SMARCA1		3.14874e+06			495492									361917	259607			3.74852e+06
O60264	SMARCA5	3.00134e+06		7.41203e+06		3.39091e+06	1.61989e+06							4.79486e+06	1.28091e+06	2.29581e+06	9.48924e+06	8.41951e+06
Q9NTJ3	SMC4		1.02517e+06	166230		177504	90323.9							1.4449e+06	715443	684550	2.31305e+06	797538	1.00365e+06
Q16143	SNCB													356658	388921		940339
Q7KZF4	SND1	1.23224e+07	3.49477e+07	1.98859e+07	2.08944e+07	1.35225e+07	5.23858e+06							1.2555e+07	6.10608e+06	3.82089e+06	1.71465e+07	1.2806e+07	1.04868e+07
P09661	SNRPA1	3.05282e+06	6.86561e+06	280897	3.81228e+06	3.09919e+06	1.22134e+06							2.61577e+06	144848	951397		4.00598e+06	2.07311e+06
P62316	SNRPD2		2.45525e+07	1.38497e+07		7.4088e+06	3.38145e+06							1.1005e+07	3.80829e+06	3.27222e+06	1.96936e+07	1.09935e+07	1.54625e+07
A8MWD9	SNRPGP15													3.17931e+06	1.58241e+06			4.83353e+06
Q13596	SNX1	784069			1.28461e+06	2.8147e+06	786558							2.14336e+06	1497294	1373910	1.87689e+06	1.20497e+06
O60749	SNX2		527223	336442	233280											61458.3
O95219	SNX4	316291				358479								1.30437e+06	1.17353e+06	644562	1111603		481198
P18583	SON					102549	253375							810532	628261		483554	1.06407e+06	871275
P23497	SP100	397964	444569	419597	485050		284240								503205	258175			763309
Q96T58	SPEN		209461												766620	289633
Q13813	SPTAN1	72976				186642								221579	277650		9.80434e+06	3.73005e+06	820121
Q01082	SPTBN1														868060	1.63849e+06
Q13501	SQSTM1	1.46107e+07			1.26502e+07		4.66803e+06							1.86467e+07	1.53463e+07	2.07283e+07	4.25001e+07	3.13243e+07	2.01845e+07
O76094	SRP72	169416												579843	541370	448525	771613	701344	324011
Q96SB4	SRPK1		1.19376e+06	62094.1			108501							306214
Q9UQ35	SRRM2	115794			1.78702e+06	1.29394e+06								271884		491030
Q05519	SRSF11			1972893		2.89551e+06	1.61841e+06								2546963		1.12305e+06		1.95045e+06
P42224	STAT1	5.52313e+06	4891842	3924633	4809000	6.10027e+06	2.6105e+06							8691955	7.42954e+06	4513307	7.98667e+06	6.12857e+06	3.8059e+06
P40763	STAT3	856340	757512	383606	765153	895496	376008							3.24965e+06	1.19979e+06	836185	2.63682e+06	1.39254e+06	536829
P42226	STAT6		180279	90622.5		234752									145687				86329.3
O95210	STBD1	442630	844906	446238	889506	831767	254353							570890	380747	318455	420980	436202	267148
Q9H5V9	STEEP1	1.98903e+06	1.74842e+06	381976	1.70266e+06	1.2917e+06								3.84349e+06	3.34981e+06	1314488	3.94541e+06	2.30544e+06	1.35023e+06
P31948	STIP1	1.74474e+06	3.49817e+06			2.63238e+06								9.73512e+06	1.93522e+06	821149	1.55581e+07	1.3181e+07	2.79315e+06
P16949	STMN1	1.68878e+06	637305	898026	897164	1.17988e+06	481166							5.35822e+06	3.98893e+06	5.42364e+06	6.60331e+06	6.83442e+06	1.67025e+06
P53999	SUB1		829972	236873	535071	747147	471019							2.35031e+06	1.05637e+06	1.26629e+06	9.02506e+06	7.45156e+06
Q8IWZ8	SUGP1		792307	983543		836534	427004								1.32231e+06	816837	1335236	1.05478e+06	944825
O75683	SURF6	688991	771079	724384	879057	669411	345345
Q92797	SYMPK			992889	1.0458e+06										164206	77305.8
O15061	SYNM													700719	407274	85202			244551
Q9H987	SYNPO2L	235008		236141	264647	414547	141972							443909	349765		368897
Q86TM6	SYVN1													430860	422912		486239	388962	121667
Q9Y6A5	TACC3													257357	124353	131983
P21675	TAF1	866566	739528	748839	824126	1.00042e+06	450020							2.08281e+06	2.216e+06	1.07626e+06	1.8966e+06	2.18124e+06	806716
Q15545	TAF7	964239	1.36369e+06	868174	1.32349e+06	1.21015e+06	552840							3.52328e+06	1.64803e+06	1596788	2.85455e+06	1.96995e+06	1.2945e+06
P37802	TAGLN2	1.82326e+07	1.65957e+07	1.12123e+07	1.22585e+07	1.6867e+07	8.14699e+06							3.83385e+07	3.01815e+07	1.60321e+07	4.67956e+07	4.0508e+07	1.58212e+07
Q9C0D5	TANC1	1.29146e+06	1.53891e+06	496994	1.18055e+06	1.34859e+06	519662							2.71942e+06	1.91023e+06	1.23672e+06	1.5892e+06	930917	1.02435e+06
Q13148	TARDBP		4980039		1.94295e+06									1.4737e+06	782041				5.83683e+06
P26639	TARS1													6.56232e+06	2.91229e+06	1.01991e+06
Q99426	TBCB	7.4622e+06		1.53142e+07			2.6837e+06							9.09854e+06		2.72619e+06	9.37861e+06	6.70793e+06
Q13428	TCOF1	910243	1.69798e+06	1041695	1.08115e+06	1.57276e+06	487659							2.26223e+06	517032		7.72112e+06	3.92167e+06
P28347	TEAD1	630474	182522		448446	281148								803389	896243	338054	515539		913549
P19532	TFE3	842149	597333	373542	712750	879866								3.50083e+06	2.56354e+06	1400954	2.8183e+06	1.95412e+06	1.15625e+06
O43493	TGOLN2																866520	734873	155743
Q8NI27	THOC2	266194	781187	675276	185780	271566	81761.4									531672		1.1022e+06	1.19761e+06
Q6I9Y2	THOC7													329374	137318	226723
Q9Y2W1	THRAP3	5.8851e+06	6.66406e+06	3.34697e+06	6.93392e+06	4.8776e+06	1.40406e+06							5.37825e+06	3.27989e+06	2.72077e+06	6.04572e+06	5.01399e+06	5.11966e+06
Q07157	TJP1	1.05728e+06	682161	294567	979677	961940								3.48605e+06	3.68302e+06	876058	980181	953618	576896
Q9UDY2	TJP2	1773888	1.87955e+06	1.28346e+06	2.00026e+06	1.98765e+06	688382							6.41997e+06	4.79085e+06	3.62164e+06	2.91504e+06	1.01871e+06	3.32905e+06
Q9Y490	TLN1	3.03018e+06	1.99649e+07	5.89414e+06	5.17025e+06	5.99797e+06	1.96921e+06							8.14385e+06	4.32489e+06	3.90474e+06	1.37051e+07	8.69013e+06	5.98946e+06
Q9Y2S6	TMA7	191904	272053	191182	285335	261323	211364							347938	298009	240908		201725	155322
Q9BVC6	TMEM109		562174	366926		609090	173602								554520
Q9NW97	TMEM51		220498		168785	233775	111422
Q8NBN3	TMEM87A													769370		405952
P42166	TMPO	9.00851e+06	3.68129e+07	1.7052e+07	1.68326e+07	8.28207e+06								1.10734e+07	168935		1.47278e+07	1.78608e+07	2.09996e+07
P42167	TMPO.1	842983	1.00933e+06	847734	1.9025e+06	2.08112e+06	3.01867e+06							1.27568e+06	6.86602e+06	5.21511e+06	1.82517e+06	1.50986e+06	229584
P63313	TMSB10													193769	148292
Q9C0C2	TNKS1BP1													243833	641655	59221.8
O94842	TOX4	1.45518e+07	1.15204e+07	9.88528e+06	1.58031e+07	1.34856e+07	6.34226e+06							2.64244e+07	1.94394e+07	1.2836e+07	2.52124e+07	2.20366e+07	9.64837e+06
O14683	TP53I11					171161	90031.2
P09493	TPM1						167827							296818		307467
P06753	TPM3	1.17294e+06	848686			978853								536078	693408		7.49383e+06	3.83655e+06	213380
P67936	TPM4	2.04758e+07	1.68385e+07	1.93368e+07	1.02433e+07	1.71598e+07	6.14056e+06							2.74732e+07	1.44055e+07	1.16768e+07	5.70987e+07	7.25952e+07	1.27881e+07
P12270	TPR	1.86881e+07	1.84102e+07	1.36615e+07	2.00393e+07	1.76251e+07	8.42166e+06							5.06053e+07	4.55722e+07	2.945e+07	4.2024e+07	4.17187e+07	2.48349e+07
Q9ULW0	TPX2	452954	791590	868039	1.29912e+06	1.09111e+06	338520							1.4128e+06		706021		957313
Q14258	TRIM25	2.43136e+06	2.78722e+06	1.68722e+06	1.65499e+06		1.14359e+06							1.63978e+06	4.53778e+06	2.73983e+06	4.63052e+06	2.03097e+06	1728466
Q9BRZ2	TRIM56	660712			210995									837632		1.00921e+06		1.94197e+06
O75962	TRIO		377797		976072		190641							441499	374487		407252
Q9BQ61	TRIR	3.20904e+06	2.70795e+06	1.05936e+06	806230	1.38499e+06	1.01054e+06							3.85034e+06	3.01403e+06	2.3989e+06	1.90333e+06	1.15316e+06	680384
Q7Z2T5	TRMT1L					137649	55432.3
Q8WZ42	TTN				681550	912380
Q12792	TWF1	2.11823e+06		3.58446e+06	4.16133e+06	2699117	215137							4.16643e+06	1.23786e+06	1.26083e+06	3.85725e+06	2.80918e+06	8.98061e+06
Q16881	TXNRD1	2.09309e+06	2.6252e+06		995215	1.72853e+06	583011							2.37818e+06	1.27287e+06	1.02586e+06	6.94393e+06	6.36778e+06	1.38837e+06
O15042	U2SURP		1.98041e+06		716215	429082	518353							921859	290950	543712	2.71555e+06	175038	167807
Q14157	UBAP2L	1.2361e+06			1.24559e+06	990866	463404							2.17631e+06	97456.6			1.36405e+06	77062.8
P61081	UBE2M	316143	701348	173862		469341	230456							524373	438880	211176	1.2034e+06
Q9C0C9	UBE2O					780642								3.37153e+06	1.2891e+06	2.36217e+06	1.88117e+06	197731
Q05086	UBE3A		1.78044e+06															417969	139326
Q92575	UBXN4	479330	545586	395699	528708		258338								552115
Q92890	UFD1	237819												556412	388533	285314	493176		226143
Q9H3U1	UNC45A	803036	896312	661306	296002	1.12165e+06								287498		404097	300063		62284.7
Q9Y4E8	USP15	323000	2.03047e+06		865913	316920									188657		317271		892516
Q93009	USP7	5.82796e+06	1.51952e+07	4.55087e+06	1.56619e+07	7.74807e+06	1.85241e+06							8.48898e+06	6.27661e+06	2.29717e+06	5.31287e+06	8.18316e+06	1.26644e+07
P46939	UTRN	1.18427e+06	825052	483763	856217	693090	478952							2.1984e+06	1.72977e+06	1.0639e+06	1.45396e+06	936244	597267
Q2YD98	UVSSA		245138	185538	247495									641240
P23763	VAMP1	1.75712e+06	1.73979e+06	1.48323e+06	1675305	2.5022e+06	1.09577e+06							3.20211e+06	2674889	1.72606e+06		2.78443e+06	1.18372e+06
Q9P0L0	VAPA	728287	599374	232598	181009	908988	316994							5.46383e+06	2.21637e+06	1.22773e+06	6.5229e+06	5.3767e+06	1.57496e+06
O95292	VAPB	1.29105e+06	665057	486383	2.19832e+06	2.15666e+06	766673							4.66232e+06	2.12887e+06	1.82579e+06	2.84537e+06	2.85422e+06	990237
P26640	VARS1				401214	698770	128371									74204.5
P18206	VCL													2.61195e+06	1.4452e+06		7.37988e+06	5.85341e+06	1.44975e+06
P55072	VCP	1.23587e+07			1.28714e+07	7.72502e+06	4.79468e+06							1.25571e+07	4.38042e+06	3.37208e+06	3.2324e+07
Q96JH7	VCPIP1	5.87805e+06	5.81973e+06	4.56925e+06	5.07397e+06	5.89169e+06	2.57023e+06							5.16339e+06	3661432	2.06019e+06	3.77365e+06	2.75497e+06	3.24903e+06
P08670	VIM	1.1453e+08	1.21971e+08	7.4005e+07	6.94857e+07	1.0573e+08	4.36072e+07							2.40281e+08	1.53839e+08	1.00154e+08	4.97686e+08	3.71289e+08	1.25206e+08
Q8N511	VMA12	612438	587652	428621	696903	693907	302552							2.67117e+06	1.80382e+06	945865		1.58394e+06	685287
Q9Y2W2	WBP11					138808								192725		236470	1.30942e+06	785467	423400
Q8NI36	WDR36	2.40953e+06												2.90333e+06	1.01279e+06
Q9NW82	WDR70	443877				534930	248909										548716
Q9NZC7	WWOX	5.84181e+06	298928	2.77619e+06	4.9756e+06	164161								5.98554e+06	4401825	2.90854e+06	4.6608e+06	5.40806e+06	2.40766e+06
Q9HCS7	XAB2	3656810	3.7485e+06	2.4946e+06	3.35286e+06	3.88052e+06	1955731							4.9163e+06	3.09577e+06	2.37477e+06	2.88772e+06	3.69206e+06	5.05534e+06
O15498	YKT6	465583												187097	485515		1.66175e+06	830460
P49750	YLPM1		326227	165460		233281	127694										82768.8
Q9H6S0	YTHDC2			164953		345278	222395							1.0403e+06	625066	416874		478180	270597
P31946	YWHAB	1.43558e+06	953780	839134	245745	1.33931e+06	437077							1.54159e+06	1.11855e+06	451666	3.37872e+06	2.16536e+06	439074
P27348	YWHAQ				496360	842188											3.27514e+06	3.07998e+06
Q86T24	ZBTB33	3.46354e+06		1655109	2.4918e+06	3.29003e+06	1.63994e+06							4.98016e+06	3.62429e+06	3.45014e+06	3.21671e+06	3.26873e+06	2.48601e+06
Q8WU90	ZC3H15				131736									402651		125496	235994
Q86VM9	ZC3H18		1.46982e+06	472393	1.40568e+06	1.95441e+06	429657							931432	116567	372726	1.18638e+06	601921	477680
Q9UPT8	ZC3H4		631595	317173												393993	735239	604523	366346
Q8IWR0	ZC3H7A	508297	436077	407784	391486	580633	270128							796481	642040	400397		630200	302468
Q7Z2W4	ZC3HAV1	804620	2.59495e+06	864408	1.85228e+06	654701	529414							1.02415e+06			635274
Q86WB0	ZC3HC1	345176	4.96515e+06	2.48479e+06	1.42522e+06	1.77221e+06	498549							1.27325e+06	772267
Q9HCK1	ZDBF2													256396		126405
Q9H8U3	ZFAND3	400919		413582		479045
O95159	ZFPL1		1.32501e+06		638622	164777	90439.3
Q96KR1	ZFR	1.12931e+06	1.07251e+06	934603	1.03942e+06	1.15569e+06	234298							1.03469e+06	919933	440661	1.89169e+06	1.28376e+06	424799
Q96NC0	ZMAT2	793302	659076	612018	743126	760100	408940							1.48807e+06	1.3181e+06	780333	1.26044e+06	1.16479e+06	571124
Q9ULU4	ZMYND8	1.01282e+06	1.15847e+06	816736	1.17144e+06	1.23884e+06	560872							1.23717e+06	1.28401e+06	693926	1.10283e+06	1.32274e+06	668623
Q9UQR1	ZNF148													680935	587895	485219
Q8ND82	ZNF280C		735224	525896	672334	679267									145146			542337
Q5VUA4	ZNF318		187297			1.36011e+06								265971	279194	125978			98194.2
Q9Y4E5	ZNF451					327396								443202	339289	320787
O15014	ZNF609	353190	446858	330670	414333	615882	211564
Q969S3	ZNF622		137199		140793		83998.8
P35789	ZNF93	352630			321534	293402								363342	320777	154212		412117
O95218	ZRANB2	74322	472535	502141	489168	1.04337e+06	662953							662970	1.69496e+06	944586	1.74079e+06	944834	375292
Q15942	ZYX	3.98261e+06	2.90195e+06	1.61134e+06	3.94041e+06	4.24165e+06	1.37301e+06							4.21695e+06	2.99502e+06	1.81874e+06	5.2e+06	1.87746e+06	1.21879e+06

## Sheet: Post DEP Dataset FINAL DATASET
name	F.lipo_1	F.lipo_2	F.lipo_3	F.PFF_1	F.PFF_2	F.PFF_3	S.lipo_1	S.lipo_2	S.lipo_3	S.PFF_1	S.PFF_2	S.PFF_3	Accession	Gene.Name	ID	imputed	num_NAs	F.lipo_vs_F.PFF_CI.L	F.lipo_vs_F.PFF_CI.R	F.lipo_vs_F.PFF_diff	F.lipo_vs_F.PFF_p.adj	F.lipo_vs_F.PFF_p.val	F.lipo_vs_S.lipo_CI.L	F.lipo_vs_S.lipo_CI.R	F.lipo_vs_S.lipo_diff	F.lipo_vs_S.lipo_p.adj	F.lipo_vs_S.lipo_p.val	F.PFF_vs_S.lipo_CI.L	F.PFF_vs_S.lipo_CI.R	F.PFF_vs_S.lipo_diff	F.PFF_vs_S.lipo_p.adj	F.PFF_vs_S.lipo_p.val	F.PFF_vs_S.PFF_CI.L	F.PFF_vs_S.PFF_CI.R	F.PFF_vs_S.PFF_diff	F.PFF_vs_S.PFF_p.adj	F.PFF_vs_S.PFF_p.val	S.lipo_vs_S.PFF_CI.L	S.lipo_vs_S.PFF_CI.R	S.lipo_vs_S.PFF_diff	S.lipo_vs_S.PFF_p.adj	S.lipo_vs_S.PFF_p.val	F.lipo_vs_F.PFF_significant	F.lipo_vs_S.lipo_significant	F.PFF_vs_S.lipo_significant	F.PFF_vs_S.PFF_significant	S.lipo_vs_S.PFF_significant	significant
AAK1	18.7602	19.1935	19.9004	18.9155	19.5987	20.5471	20.2287	20.2592	20.3169	19.5912	18.9454	18.4698	Q2M2I8	AAK1	Q2M2I8	FALSE	0	-1.80294	0.998153	-0.402393	0.904931	0.531071	-2.38414	0.416957	-0.983589	0.85597	0.146181	-1.98174	0.81935	-0.581196	0.779974	0.371465	-0.715587	2.0855	0.684959	0.894002	0.296455	-0.134391	2.6667	1.26615	0.320962	0.0710839	FALSE	FALSE	FALSE	FALSE	FALSE	FALSE
ABCF2	21.2299	22.2039	0	21.7824	20.7317	19.1998	21.535	20.3344	20.7513	19.1238	0	22.241	Q9UG63	ABCF2	Q9UG63	TRUE	2	-21.5134	9.3266	-6.0934	0.868798	0.393723	-21.8156	9.02435	-6.39564	0.907365	0.371702	-15.7222	15.1178	-0.302243	0.877187	0.965517	-8.63694	22.2031	6.78306	0.903351	0.344809	-8.3347	22.5053	7.0853	0.661741	0.324863	FALSE	FALSE	FALSE	FALSE	FALSE	FALSE
ABI1	0	0	0	0	0	0	17.9283	18.0956	0	0	0	0	Q8IZP0	ABI1	Q8IZP0	TRUE	10	-9.22218	9.22218	0	0.951391	1	-21.2302	-2.78579	-12.008	0.591102	0.0164456	-21.2302	-2.78579	-12.008	0.170791	0.0164456	-9.22218	9.22218	0	0.950601	1	2.78579	21.2302	12.008	0.0803496	0.0164456	FALSE	FALSE	FALSE	FALSE	FALSE	FALSE
ACIN1	19.3803	20.1408	19.1396	19.3822	18.9635	18.731	18.3892	20.0839	19.6156	19.9447	19.5531	20.6862	Q9UKV3	ACIN1	Q9UKV3	FALSE	0	-0.915632	1.97168	0.528022	0.880231	0.428478	-1.25299	1.63432	0.190668	0.935223	0.771365	-1.78101	1.1063	-0.337354	0.835629	0.60904	-2.47946	0.407849	-1.0358	0.830986	0.138639	-2.1421	0.745203	-0.698451	0.645775	0.301358	FALSE	FALSE	FALSE	FALSE	FALSE	FALSE
ACTB	28.8098	28.674	29.2104	28.1489	28.9518	0	28.1787	28.1719	28.1272	29.3112	29.2489	28.5252	P60709	ACTB	P60709	TRUE	1	-4.71602	24.445	9.86448	0.664408	0.159796	-13.8417	15.3193	0.738812	0.940689	0.91104	-23.7062	5.45484	-9.12567	0.680469	0.18992	-24.5754	4.58563	-9.99488	0.842179	0.154942	-15.4497	13.7113	-0.869211	0.829461	0.895438	FALSE	FALSE	FALSE	FALSE	FALSE	FALSE
ACTC1	23.6088	23.216	20.1629	22.7197	23.4064	0	23.1377	22.5259	22.1926	24.7172	24.6485	24.4505	P68032	ACTC1	P68032	TRUE	1	-4.95764	18.8654	6.95387	0.754714	0.21857	-12.201	11.622	-0.289489	0.942277	0.957252	-19.1549	4.66815	-7.24335	0.690569	0.201607	-21.1416	2.68146	-9.23004	0.808521	0.113243	-13.8982	9.92482	-1.98669	0.799282	0.714048	FALSE	FALSE	FALSE	FALSE	FALSE	FALSE
ACTN4	0	0	0	0	0	0	25.6008	24.7747	0	25.8479	26.0016	0	O43707	ACTN4	O43707	TRUE	8	-18.4333	18.4333	0	0.951391	1	-35.2252	1.64153	-16.7918	0.793947	0.0693156	-35.2252	1.64153	-16.7918	0.475884	0.0693156	-35.7165	1.15017	-17.2832	0.725429	0.0628783	-18.9247	17.942	-0.491362	0.837165	0.953119	FALSE	FALSE	FALSE	FALSE	FALSE	FALSE
ADAR	0	23.951	0	22.892	21.9197	0	0	0	0	0	0	0	P55265	ADAR	P55265	TRUE	9	-23.6864	9.77931	-6.95355	0.860048	0.370823	-8.74918	24.7165	7.98367	0.898693	0.30768	-1.79563	31.6701	14.9372	0.490975	0.0740872	-1.79563	31.6701	14.9372	0.751486	0.0740872	-16.7329	16.7329	0	0.842923	1	FALSE	FALSE	FALSE	FALSE	FALSE	FALSE
ADD2	0	0	0	0	0	0	17.4654	17.4318	17.1176	17.5047	0	0	P35612	ADD2	P35612	TRUE	8	-8.96665	8.96665	0	0.951391	1	-26.3049	-8.37163	-17.3383	0.207503	0.00183635	-26.3049	-8.37163	-17.3383	0.0190679	0.00183635	-14.8015	3.13176	-5.83489	0.853356	0.174576	2.53674	20.47	11.5034	0.0829964	0.0176386	FALSE	FALSE	TRUE	FALSE	FALSE	TRUE
ADNP	19.8936	20.7809	20.26	0	0	19.0929	19.5078	18.9583	0	0	19.8332	21.4687	Q9H2P0	ADNP	Q9H2P0	TRUE	4	-3.44925	31.3437	13.9472	0.50472	0.102905	-9.90698	24.8859	7.48947	0.90528	0.354664	-23.8542	10.9387	-6.45773	0.795588	0.421875	-24.7994	9.99347	-7.40298	0.905861	0.359977	-18.3417	16.4512	-0.945252	0.83074	0.904642	FALSE	FALSE	FALSE	FALSE	FALSE	FALSE
ADSL	0	0	0	20.3499	19.729	0	19.4441	0	19.5593	0	0	0	P30566	ADSL	P30566	TRUE	8	-27.6327	0.913411	-13.3596	0.320205	0.0632476	-27.2742	1.27191	-13.0011	0.793969	0.0693309	-13.9146	14.6315	0.358498	0.876359	0.955822	-0.913411	27.6327	13.3596	0.7264	0.0632476	-1.27191	27.2742	13.0011	0.316067	0.0693309	FALSE	FALSE	FALSE	FALSE	FALSE	FALSE
AFDN	0	20.2386	0	0	20.8424	21.0388	20.3297	20.5384	21.0939	19.7851	19.5573	0	P55196	AFDN	P55196	TRUE	4	-25.1381	10.7097	-7.21418	0.865736	0.385384	-31.8317	4.01613	-13.9078	0.837022	0.112821	-24.6175	11.2303	-6.69361	0.794827	0.419189	-17.0777	18.7702	0.846258	0.947632	0.917083	-10.3841	25.4638	7.53986	0.685665	0.365256	FALSE	FALSE	FALSE	FALSE	FALSE	FALSE
AFF4	21.1309	19.9868	0	19.884	20.5654	20.7434	19.4635	20.4132	19.5236	18.7782	19.2328	0	Q9UHB7	AFF4	Q9UHB7	TRUE	2	-21.0036	7.6202	-6.69169	0.834302	0.316908	-20.4061	8.21771	-6.09419	0.905909	0.35969	-13.7144	14.9094	0.597504	0.873797	0.926647	-6.58462	22.0392	7.72727	0.882997	0.252238	-7.18213	21.4417	7.12977	0.635989	0.288114	FALSE	FALSE	FALSE	FALSE	FALSE	FALSE
AGFG1	0	0	0	0	18.5476	0	0	18.7307	18.7762	18.2008	0	0	P52594	AGFG1	P52594	TRUE	8	-22.5282	10.1631	-6.18255	0.87554	0.413473	-28.848	3.84335	-12.5023	0.840056	0.117341	-22.6654	10.0259	-6.31977	0.79026	0.403591	-16.2301	16.4613	0.115598	0.950177	0.987554	-9.9103	22.781	6.43537	0.701155	0.395397	FALSE	FALSE	FALSE	FALSE	FALSE	FALSE
AHNAK	28.2975	27.3116	27.4972	28.0928	28.0971	28.1328	29.185	29.5078	29.3955	28.6985	28.6514	28.5439	Q09666	AHNAK	Q09666	FALSE	0	-1.48863	0.677792	-0.405418	0.877054	0.418196	-2.74383	-0.577411	-1.66062	0.462667	0.00716564	-2.33841	-0.171992	-1.2552	0.269317	0.0278324	-1.60693	0.55949	-0.52372	0.895123	0.301657	-0.351727	1.81469	0.731482	0.495021	0.160491	FALSE	FALSE	FALSE	FALSE	FALSE	FALSE
AHNAK2	21.144	21.2711	17.4413	21.193	21.2475	20.7454	23.932	23.8774	23.5903	23.1078	22.9302	22.1038	Q8IVF2	AHNAK2	Q8IVF2	FALSE	0	-3.32855	1.10894	-1.10981	0.815293	0.286284	-6.06648	-1.62899	-3.84774	0.327428	0.00356641	-4.95668	-0.519182	-2.73793	0.213808	0.0211015	-3.87073	0.566766	-1.65198	0.820789	0.126076	-1.1328	3.30469	1.08595	0.641968	0.296107	FALSE	FALSE	FALSE	FALSE	FALSE	FALSE
AHR	0	0	0	0	0	0	17.5261	19.5131	18.9601	17.8545	0	0	P35869	AHR	P35869	TRUE	8	-9.1868	9.1868	0	0.951391	1	-27.8532	-9.47961	-18.6664	0.160391	0.00133871	-27.8532	-9.47961	-18.6664	0.0128932	0.00133871	-15.1383	3.23529	-5.95151	0.854244	0.176309	3.5281	21.9017	12.7149	0.0674944	0.0122098	FALSE	FALSE	TRUE	FALSE	FALSE	TRUE
AHSA1	21.3695	21.7646	19.8213	17.728	21.2581	18.1174	18.508	21.2374	21.1035	19.105	19.8	21.3577	O95433	AHSA1	O95433	FALSE	0	-0.796041	4.69721	1.95058	0.625389	0.142224	-2.04446	3.44879	0.702167	0.924999	0.576382	-3.99504	1.49821	-1.24842	0.7645	0.329825	-3.79967	1.69358	-1.05305	0.912722	0.40738	-2.55126	2.94199	0.195369	0.826608	0.875417	FALSE	FALSE	FALSE	FALSE	FALSE	FALSE
AIMP2	0	0	0	0	18.7936	0	18.2234	18.4935	0	0	0	0	Q13155	AIMP2	Q13155	TRUE	9	-19.6769	7.14787	-6.26453	0.834571	0.317388	-25.6514	1.17342	-12.239	0.793377	0.0689208	-19.3869	7.43796	-5.97445	0.768175	0.339065	-7.14787	19.6769	6.26453	0.898331	0.317388	-1.17342	25.6514	12.239	0.314902	0.0689208	FALSE	FALSE	FALSE	FALSE	FALSE	FALSE
ALDH3A2	0	0	0	0	0	0	16.7663	19.5854	19.7038	18.7666	0	18.2787	P51648	ALDH3A2	P51648	TRUE	7	-9.59566	9.59566	0	0.951391	1	-28.2808	-9.08952	-18.6852	0.200727	0.0017569	-28.2808	-9.08952	-18.6852	0.0181678	0.0017569	-21.9441	-2.75275	-12.3484	0.443438	0.0173847	-3.25889	15.9324	6.33677	0.508153	0.168919	FALSE	FALSE	TRUE	FALSE	FALSE	TRUE
ALG13	20.3148	0	0	19.5881	0	0	19.2351	19.4772	0	0	0	0	Q9NP73	ALG13	Q9NP73	TRUE	8	-17.2089	17.6934	0.242239	0.950118	0.975575	-23.5836	11.3186	-6.1325	0.91509	0.446172	-23.8259	11.0764	-6.37474	0.797584	0.429041	-10.9218	23.9805	6.52937	0.91413	0.418344	-4.54703	30.3552	12.9041	0.44424	0.128367	FALSE	FALSE	FALSE	FALSE	FALSE	FALSE
ALMS1	0	0	0	0	0	0	19.2128	18.9127	0	17.9311	0	0	Q8TCU4	ALMS1	Q8TCU4	TRUE	9	-13.361	13.361	0	0.951391	1	-26.0695	0.652511	-12.7085	0.778731	0.05983	-26.0695	0.652511	-12.7085	0.442132	0.05983	-19.338	7.38397	-5.97703	0.902008	0.33711	-6.62954	20.0925	6.73146	0.632072	0.283038	FALSE	FALSE	FALSE	FALSE	FALSE	FALSE
AMER1	0	0	0	0	0	0	0	0	0	17.6976	17.7956	18.0964	Q5JTC6	AMER1	Q5JTC6	TRUE	9	-0.983517	0.983517	0	0.951391	1	-0.983517	0.983517	0	0.943668	1	-0.983517	0.983517	0	0.880043	1	-18.8467	-16.8796	-17.8632	8.75964e-15	2.12581e-11	-18.8467	-16.8796	-17.8632	7.24958e-15	2.12581e-11	FALSE	FALSE	FALSE	TRUE	TRUE	TRUE
ANKRD17	20.6985	20.2047	20.3554	20.4322	20.3608	20.4057	20.0062	19.9959	19.7522	19.6412	19.5047	19.5008	O75179	ANKRD17	O75179	FALSE	0	-0.982816	1.02277	0.0199791	0.949543	0.96495	-0.501351	1.50424	0.501444	0.89521	0.286419	-0.52133	1.48426	0.481465	0.753752	0.304832	-0.15215	1.85344	0.850645	0.774841	0.087041	-0.633614	1.37198	0.369181	0.715017	0.425567	FALSE	FALSE	FALSE	FALSE	FALSE	FALSE
ANKS1A	19.6456	19.7528	19.9021	19.4063	19.7247	19.9879	19.3736	19.346	0	18.6831	18.5314	0	Q92625	ANKS1A	Q92625	TRUE	2	-13.6488	13.7699	0.0605579	0.950993	0.992226	-6.84904	20.5697	6.86032	0.895153	0.28609	-6.9096	20.5091	6.79977	0.746786	0.290091	-6.40794	21.0108	7.30142	0.884675	0.258262	-13.2077	14.211	0.501659	0.834912	0.935682	FALSE	FALSE	FALSE	FALSE	FALSE	FALSE
ANLN	0	17.521	18.8032	17.6185	17.9065	0	18.0035	18.0777	17.9155	19.2884	0	21.1912	Q9NQW6	ANLN	Q9NQW6	TRUE	3	-16.3316	16.8644	0.266403	0.949913	0.97176	-22.4889	10.7072	-5.89083	0.914689	0.441808	-22.7553	10.4408	-6.15724	0.795672	0.422173	-18.2496	14.9465	-1.65155	0.943921	0.826522	-12.0923	21.1037	4.50569	0.760641	0.553487	FALSE	FALSE	FALSE	FALSE	FALSE	FALSE
ANXA1	0	20.7678	0	0	21.2089	0	21.5421	21.2018	21.0633	22.9317	22.8355	21.4746	P04083	ANXA1	P04083	TRUE	4	-15.3105	15.0164	-0.147019	0.950509	0.982938	-29.5099	0.816968	-14.3465	0.780704	0.060946	-29.3629	0.963987	-14.1994	0.454569	0.0631499	-30.5077	-0.180873	-15.3443	0.676709	0.0478509	-16.3083	14.0186	-1.14486	0.825502	0.867842	FALSE	FALSE	FALSE	FALSE	FALSE	FALSE
ANXA2	25.7371	26.3528	26.1822	25.6355	25.4294	25.465	25.7726	25.5495	25.7195	26.1608	26.4612	26.7541	P07355	ANXA2	P07355	FALSE	0	-0.468431	1.62992	0.580746	0.778773	0.241366	-0.638995	1.45936	0.410182	0.910388	0.398568	-1.21974	0.878614	-0.170564	0.851817	0.720921	-1.99792	0.100438	-0.94874	0.745006	0.0710253	-1.82735	0.271001	-0.778176	0.442635	0.127351	FALSE	FALSE	FALSE	FALSE	FALSE	FALSE
AP1AR	0	0	0	0	0	0	17.5288	0	17.3295	0	0	0	Q63HQ0	AP1AR	Q63HQ0	TRUE	10	-8.92725	8.92725	0	0.951391	1	-20.5467	-2.69217	-11.6194	0.591337	0.0164761	-20.5467	-2.69217	-11.6194	0.170937	0.0164761	-8.92725	8.92725	0	0.950601	1	2.69217	20.5467	11.6194	0.0804216	0.0164761	FALSE	FALSE	FALSE	FALSE	FALSE	FALSE
AP3D1	0	21.5995	20.6642	20.6672	0	0	0	0	0	0	0	0	O14617	AP3D1	O14617	TRUE	9	-7.88793	22.2856	7.19883	0.828954	0.307645	-0.998852	29.1747	14.0879	0.785448	0.0637618	-8.19768	21.9758	6.88908	0.763639	0.327714	-8.19768	21.9758	6.88908	0.900301	0.327714	-15.0868	15.0868	0	0.842923	1	FALSE	FALSE	FALSE	FALSE	FALSE	FALSE
ARCN1	22.0335	23.7442	23.8029	23.0778	22.1112	22.3365	21.5636	21.1711	21.4895	21.8785	22.0694	23.2529	P48444	ARCN1	P48444	FALSE	0	-0.858728	2.22881	0.685042	0.846744	0.340811	0.241697	3.32924	1.78547	0.681136	0.0280609	-0.443345	2.6442	1.10043	0.626291	0.140919	-1.43552	1.65202	0.108252	0.946064	0.877167	-2.53594	0.551597	-0.992173	0.523478	0.179416	FALSE	FALSE	FALSE	FALSE	FALSE	FALSE
ARF3	0	0	0	0	0	0	23.3156	0	24.9462	23.6909	0	0	P61204	ARF3	P61204	TRUE	9	-17.2604	17.2604	0	0.951391	1	-33.3477	1.17311	-16.0873	0.786116	0.0641735	-33.3477	1.17311	-16.0873	0.458262	0.0641735	-25.1573	9.36343	-7.89695	0.900135	0.326826	-9.07006	25.4507	8.19032	0.651965	0.310177	FALSE	FALSE	FALSE	FALSE	FALSE	FALSE
ARFGAP1	0	0	0	0	18.8051	0	17.8256	20.2579	0	0	19.6005	0	Q8N6T3	ARFGAP1	Q8N6T3	TRUE	8	-23.2202	10.6835	-6.26835	0.878745	0.423605	-29.6464	4.25734	-12.6945	0.844327	0.124179	-23.378	10.5257	-6.42616	0.792891	0.412471	-17.217	16.6867	-0.265153	0.949654	0.972478	-10.7908	23.1129	6.16101	0.717486	0.431297	FALSE	FALSE	FALSE	FALSE	FALSE	FALSE
ARFIP1	0	0	0	20.2395	19.6529	18.1804	18.8987	19.0546	18.6732	0	0	0	P53367	ARFIP1	P53367	TRUE	6	-20.7132	-18.002	-19.3576	1.22737e-13	1.75337e-10	-20.2311	-17.5199	-18.8755	6.76337e-15	2.18672e-10	-0.873488	1.8377	0.482106	0.800781	0.440901	18.002	20.7132	19.3576	8.75964e-15	1.75337e-10	17.5199	20.2311	18.8755	7.24958e-15	2.18672e-10	TRUE	TRUE	FALSE	TRUE	TRUE	TRUE
ARGLU1	18.3172	0	18.2096	18.5974	16.894	18.4172	16.7307	0	0	18.4485	0	0	Q9NWB6	ARGLU1	Q9NWB6	TRUE	5	-21.5704	9.98251	-5.79394	0.87968	0.426657	-9.17774	22.3752	6.59871	0.906907	0.367865	-3.3838	28.1691	12.3926	0.575021	0.109038	-3.95637	27.5965	11.8201	0.81896	0.124018	-16.349	15.2039	-0.57257	0.834981	0.936208	FALSE	FALSE	FALSE	FALSE	FALSE	FALSE
ARHGAP1	22.558	0	0	0	0	0	21.8948	21.0257	0	21.203	0	0	Q07960	ARHGAP1	Q07960	TRUE	8	-11.6888	26.7275	7.51934	0.870309	0.397978	-25.9957	12.4207	-6.78751	0.914866	0.443731	-33.515	4.90132	-14.3069	0.604357	0.125954	-26.2759	12.1405	-7.06768	0.915056	0.425809	-11.969	26.4474	7.23918	0.710371	0.415087	FALSE	FALSE	FALSE	FALSE	FALSE	FALSE
ARHGAP35	18.963	19.9714	18.2726	19.2531	19.2704	0	16.8783	0	18.102	0	0	0	Q9NRY4	ARHGAP35	Q9NRY4	TRUE	5	-7.08703	19.5427	6.22785	0.834207	0.316738	-5.90597	20.7238	7.40891	0.885889	0.239089	-12.1338	14.4959	1.18106	0.865993	0.845054	-0.473713	26.156	12.8412	0.708662	0.0569885	-1.65478	24.975	11.6601	0.340967	0.0788026	FALSE	FALSE	FALSE	FALSE	FALSE	FALSE
ARID1B	19.5168	0	0	19.4868	19.3774	19.6472	0	0	0	0	0	0	Q8NFD5	ARID1B	Q8NFD5	TRUE	8	-22.9831	-3.01325	-12.9982	0.0439109	0.0164634	-3.47933	16.4906	6.50561	0.867434	0.174095	9.51886	29.4888	19.5038	0.0177694	0.00172267	9.51886	29.4888	19.5038	0.0373992	0.00172267	-9.98494	9.98494	0	0.842923	1	TRUE	FALSE	TRUE	TRUE	FALSE	TRUE
ARPC1B	21.2391	23.2624	0	0	0	0	0	0	0	0	0	0	O15143	ARPC1B	O15143	TRUE	10	3.42837	26.2393	14.8338	0.0439682	0.016535	3.42837	26.2393	14.8338	0.591884	0.016535	-11.4055	11.4055	0	0.880043	1	-11.4055	11.4055	0	0.950601	1	-11.4055	11.4055	0	0.842923	1	TRUE	FALSE	FALSE	FALSE	FALSE	TRUE
ARPC2	20.5401	21.197	21.3813	20.4547	20.5285	20.6795	19.1682	0	0	21.0018	21.0916	18.5706	O15144	ARPC2	O15144	TRUE	2	-9.41131	10.3818	0.485222	0.946585	0.913909	4.75355	24.5466	14.6501	0.495436	0.00864067	4.26832	24.0614	14.1649	0.13066	0.0102979	-9.56362	10.2295	0.332915	0.94852	0.940861	-23.7285	-3.93541	-13.8319	0.0651571	0.0116238	FALSE	FALSE	FALSE	FALSE	FALSE	FALSE
ARPC3	0	16.9315	0	0	0	0	18.3097	16.5304	0	0	0	0	O15145	ARPC3	O15145	TRUE	9	-6.78771	18.0754	5.64383	0.841531	0.330364	-18.4011	6.46199	-5.96955	0.898236	0.304764	-24.0449	0.818159	-11.6134	0.456453	0.0636699	-12.4315	12.4315	0	0.950601	1	-0.818159	24.0449	11.6134	0.299269	0.0636699	FALSE	FALSE	FALSE	FALSE	FALSE	FALSE
ATF7IP	0	0	0	0	0	0	18.35	18.1864	18.2132	17.5891	17.7763	17.7194	Q6VMQ6	ATF7IP	Q6VMQ6	TRUE	6	-0.97307	0.97307	0	0.951391	1	-19.2229	-17.2768	-18.2498	6.76337e-15	1.60348e-11	-19.2229	-17.2768	-18.2498	6.67838e-15	1.60348e-11	-18.668	-16.7219	-17.695	8.75964e-15	2.10317e-11	-0.418195	1.52794	0.554875	0.582956	0.22855	FALSE	TRUE	TRUE	TRUE	FALSE	TRUE
ATG3	0	0	0	0	16.8566	0	17.1275	0	17.1171	0	0	0	Q9NT62	ATG3	Q9NT62	TRUE	9	-17.891	6.65327	-5.61886	0.839512	0.32649	-23.687	0.857235	-11.4149	0.78683	0.0646181	-18.0682	6.47609	-5.79603	0.757104	0.312317	-6.65327	17.891	5.61886	0.900072	0.32649	-0.857235	23.687	11.4149	0.302193	0.0646181	FALSE	FALSE	FALSE	FALSE	FALSE	FALSE
ATIC	0	0	0	0	20.6333	20.7788	19.6399	18.8389	16.3919	19.4993	20.1762	0	P31939	ATIC	P31939	TRUE	5	-28.5156	0.907572	-13.804	0.317577	0.0627161	-33.0018	-3.57863	-18.2902	0.629398	0.0203967	-19.1978	10.2254	-4.4862	0.816467	0.506786	-14.1327	15.2905	0.578857	0.94815	0.930854	-9.64655	19.7767	5.06506	0.727256	0.455135	FALSE	FALSE	FALSE	FALSE	FALSE	FALSE
ATP11B	0	0	0	0	0	0	16.8988	17.345	0	0	0	0	Q9Y2G3	ATP11B	Q9Y2G3	TRUE	10	-8.77353	8.77353	0	0.951391	1	-20.1881	-2.64107	-11.4146	0.591588	0.0165086	-20.1881	-2.64107	-11.4146	0.171093	0.0165086	-8.77353	8.77353	0	0.950601	1	2.64107	20.1881	11.4146	0.0804981	0.0165086	FALSE	FALSE	FALSE	FALSE	FALSE	FALSE
ATP6AP2	17.9154	18.8428	18.3014	18.2297	18.0174	18.1716	17.0109	0	0	0	0	16.6738	O75787	ATP6AP2	O75787	TRUE	4	-11.9604	12.3877	0.213647	0.94977	0.969123	0.508815	24.8569	12.6829	0.739922	0.0428615	0.295168	24.6433	12.4692	0.379945	0.0457272	0.407547	24.7557	12.5816	0.661269	0.044197	-12.0617	12.2864	0.112379	0.840975	0.983755	FALSE	FALSE	FALSE	FALSE	FALSE	FALSE
ATXN2	18.5348	17.8374	18.1178	18.4026	18.7951	18.2384	18.8518	0	0	0	0	18.1264	Q99700	ATXN2	Q99700	TRUE	4	-13.6724	13.0417	-0.315373	0.949186	0.958468	-1.47761	25.2364	11.8794	0.801633	0.0749859	-1.16224	25.5518	12.1948	0.474189	0.0688015	-0.920447	25.7936	12.4366	0.729364	0.064396	-13.1152	13.5988	0.241795	0.839057	0.968151	FALSE	FALSE	FALSE	FALSE	FALSE	FALSE
ATXN2L	20.7766	21.1883	21.044	20.7125	20.8499	19.6203	20.3539	20.6803	20.2971	20.2854	20.6423	20.5421	Q8WWM7	ATXN2L	Q8WWM7	FALSE	0	-0.566161	1.78357	0.608705	0.80382	0.270503	-0.615688	1.73404	0.559178	0.898867	0.308803	-1.22439	1.12534	-0.0495271	0.873733	0.925935	-1.27057	1.07916	-0.0957023	0.945255	0.857542	-1.22104	1.12869	-0.0461752	0.834288	0.930932	FALSE	FALSE	FALSE	FALSE	FALSE	FALSE
BAG2	0	15.5128	16.6448	0	18.1599	0	0	17.9818	0	0	0	0	O95816	BAG2	O95816	TRUE	8	-10.7462	20.078	4.66591	0.90066	0.509778	-10.6868	20.1374	4.72528	0.919971	0.504546	-15.3527	15.4715	0.0593697	0.879492	0.993221	-9.35878	21.4654	6.05331	0.911261	0.39648	-9.41815	21.406	5.99394	0.703816	0.400938	FALSE	FALSE	FALSE	FALSE	FALSE	FALSE
BAG3	19.4437	17.525	17.0375	19.5729	19.9415	19.9259	20.4407	20.3127	20.423	19.628	18.839	19.1609	O95817	BAG3	O95817	FALSE	0	-3.34507	-0.277727	-1.8114	0.0907723	0.0256356	-3.92373	-0.856392	-2.39006	0.446342	0.00655314	-2.11233	0.955005	-0.578665	0.793504	0.414579	-0.929509	2.13783	0.604161	0.911076	0.395136	-0.350844	2.7165	1.18283	0.421181	0.11472	FALSE	FALSE	FALSE	FALSE	FALSE	FALSE
BAZ1B	20.3675	0	22.0078	21.5381	0	20.5352	20.087	0	20.4635	20.3181	0	0	Q9UIG0	BAZ1B	Q9UIG0	TRUE	5	-21.0274	21.2287	0.100623	0.950962	0.991618	-20.5198	21.7363	0.608222	0.942013	0.949376	-20.6204	21.6356	0.507599	0.876524	0.957741	-13.8763	28.3798	7.25174	0.918604	0.456482	-14.3839	27.8722	6.74414	0.739415	0.487656	FALSE	FALSE	FALSE	FALSE	FALSE	FALSE
BAZ2A	21.8551	21.0688	20.9272	21.3795	0	20.5597	0	20.8983	19.2761	20.2566	0	0	Q9UIF9	BAZ2A	Q9UIF9	TRUE	4	-10.7724	25.3804	7.304	0.865067	0.38361	-10.1841	25.9687	7.89228	0.904455	0.348236	-17.4881	18.6647	0.588281	0.875227	0.942783	-10.8489	25.3039	7.22754	0.910134	0.388392	-11.4371	24.7157	6.63926	0.715471	0.426612	FALSE	FALSE	FALSE	FALSE	FALSE	FALSE
BCAP31	0	0	0	0	0	0	20.5442	19.8349	19.5941	21.982	21.7887	0	P51572	BCAP31	P51572	TRUE	7	-11.1939	11.1939	0	0.951391	1	-31.185	-8.79712	-19.9911	0.292487	0.00299442	-31.185	-8.79712	-19.9911	0.0353352	0.00299442	-25.7842	-3.39628	-14.5902	0.427854	0.0163661	-5.7931	16.5948	5.40084	0.646667	0.302607	FALSE	FALSE	TRUE	FALSE	FALSE	TRUE
BCLAF1	19.6546	21.3507	21.4691	21.6452	21.2208	20.4318	21.5655	21.1346	20.8734	22.0387	21.9295	22.2431	Q9NYF8	BCLAF1	Q9NYF8	FALSE	0	-1.73896	1.19003	-0.274468	0.927099	0.680842	-1.83086	1.09813	-0.366363	0.92551	0.584444	-1.55639	1.3726	-0.0918956	0.870413	0.88998	-2.43568	0.493314	-0.971183	0.849476	0.167323	-2.34378	0.585209	-0.879287	0.558886	0.206852	FALSE	FALSE	FALSE	FALSE	FALSE	FALSE
BET1	19.8173	0	19.533	20.7376	20.0432	0	20.4827	20.396	20.6585	20.2071	19.6486	20.6765	O15155	BET1	O15155	TRUE	2	-14.9479	13.9942	-0.476844	0.948258	0.942068	-21.8667	7.07538	-7.39566	0.893474	0.27662	-21.3899	7.55222	-6.91882	0.754617	0.306738	-21.0548	7.88725	-6.58379	0.900611	0.329388	-14.136	14.8061	0.33503	0.837945	0.959275	FALSE	FALSE	FALSE	FALSE	FALSE	FALSE
BET1L	19.1262	0	0	18.662	19.3937	19.1016	19.0328	19.1476	19.0931	18.2672	18.585	0	Q9NYM9	BET1L	Q9NYM9	TRUE	3	-26.2388	0.884678	-12.6771	0.321617	0.0635349	-26.2775	0.845958	-12.7158	0.783987	0.0628742	-13.6004	13.523	-0.0387192	0.879635	0.994975	-6.79337	20.3301	6.76835	0.891949	0.287293	-6.75466	20.3688	6.80707	0.633382	0.284722	FALSE	FALSE	FALSE	FALSE	FALSE	FALSE
BOD1L1	20.4778	0	19.1921	19.4996	19.3217	0	19.6867	19.92	22.5043	20.4493	19.2176	24.1446	Q8NFC6	BOD1L1	Q8NFC6	TRUE	2	-14.1377	14.7035	0.282895	0.949572	0.965487	-21.9009	6.94022	-7.48035	0.892244	0.269967	-22.1838	6.65732	-7.76325	0.727023	0.253521	-22.7506	6.0905	-8.33007	0.87384	0.223043	-14.9874	13.8537	-0.566823	0.834287	0.930925	FALSE	FALSE	FALSE	FALSE	FALSE	FALSE
BTF3	20.6116	0	0	0	0	0	19.5898	18.8912	0	21.5457	21.2469	20.0247	P20290	BTF3	P20290	TRUE	6	-7.53948	21.2805	6.87053	0.829166	0.308001	-20.3665	8.45354	-5.95647	0.907547	0.373252	-27.237	1.58301	-12.827	0.493063	0.0747762	-35.3491	-6.5291	-20.9391	0.290574	0.00952349	-22.5221	6.29789	-8.11212	0.588605	0.234064	FALSE	FALSE	FALSE	FALSE	FALSE	FALSE
BZW2	0	21.9685	0	20.5735	0	0	20.1907	0	0	18.5983	0	21.9736	Q9Y6E2	BZW2	Q9Y6E2	TRUE	7	-20.7571	21.6871	0.465007	0.949351	0.961455	-20.6295	21.8147	0.592618	0.942064	0.950891	-21.0945	21.3497	0.127611	0.879181	0.989418	-27.8882	14.556	-6.66612	0.922506	0.494432	-28.0158	14.4283	-6.79373	0.73898	0.486434	FALSE	FALSE	FALSE	FALSE	FALSE	FALSE
C1orf198	18.7842	18.6161	19.0008	0	18.7852	19.2049	17.9443	17.9193	18.0194	17.3243	17.0937	0	Q9H425	C1orf198	Q9H425	TRUE	2	-6.9522	19.2263	6.13703	0.83359	0.315642	-12.2499	13.9286	0.839367	0.939846	0.887583	-18.3869	7.79157	-5.29766	0.783767	0.382855	-11.8985	14.2799	1.1907	0.94456	0.841158	-6.60088	19.5776	6.48836	0.63769	0.290357	FALSE	FALSE	FALSE	FALSE	FALSE	FALSE
C2CD2	0	18.2736	0	18.4125	17.6894	18.4245	0	17.8831	17.5945	0	0	19.2366	Q9Y426	C2CD2	Q9Y426	TRUE	5	-28.3684	4.19985	-12.0843	0.585478	0.127177	-22.0187	10.5495	-5.73464	0.915004	0.445232	-9.93449	22.6337	6.34961	0.789098	0.39976	-4.52083	28.0474	11.7633	0.829195	0.136289	-10.8704	21.6978	5.41367	0.733083	0.470301	FALSE	FALSE	FALSE	FALSE	FALSE	FALSE
CACTIN	19.1514	18.4227	18.4191	18.9403	18.8396	19.0121	19.0731	20.009	18.8559	18.6494	19.8687	20.1301	Q8WUQ7	CACTIN	Q8WUQ7	FALSE	0	-1.62849	1.09599	-0.266251	0.925618	0.668095	-2.01047	0.714008	-0.648233	0.898881	0.308891	-1.74422	0.980259	-0.381982	0.823426	0.540768	-1.98097	0.743511	-0.61873	0.900752	0.330155	-1.59899	1.12549	-0.236749	0.797003	0.702693	FALSE	FALSE	FALSE	FALSE	FALSE	FALSE
CACYBP	20.6886	21.8009	21.3825	21.6432	20.5279	20.4152	19.4969	20.1644	19.2563	21.5451	20.8213	18.3075	Q9HB71	CACYBP	Q9HB71	FALSE	0	-1.56025	2.4174	0.428575	0.921718	0.6368	-0.337394	3.64025	1.65143	0.821054	0.0928537	-0.765968	3.21168	1.22285	0.686765	0.19709	-1.35135	2.62629	0.637468	0.921671	0.485906	-2.57421	1.40344	-0.585387	0.750774	0.52131	FALSE	FALSE	FALSE	FALSE	FALSE	FALSE
CALD1	22.4924	21.1466	22.1268	22.6167	22.9001	22.5673	22.8652	22.8935	22.3001	22.2441	22.3151	21.0113	Q05682	CALD1	Q05682	FALSE	0	-2.1295	0.5839	-0.772799	0.766299	0.229012	-2.12105	0.592345	-0.764354	0.884662	0.233726	-1.34825	1.36514	0.00844487	0.87915	0.989046	-0.518846	2.19455	0.837853	0.863131	0.195309	-0.527291	2.18611	0.829409	0.549906	0.199429	FALSE	FALSE	FALSE	FALSE	FALSE	FALSE
CAMSAP1	18.8441	18.4816	18.7346	18.9386	19.3164	18.6652	19.2705	0	0	0	0	0	Q5T5Y3	CAMSAP1	Q5T5Y3	TRUE	5	-10.1516	9.57838	-0.286623	0.948649	0.948907	2.39826	22.1283	12.2633	0.629488	0.0204075	2.68489	22.4149	12.5499	0.18818	0.0183459	9.1084	28.8384	18.9734	0.0424367	0.00189925	-3.44149	16.2885	6.42352	0.516193	0.174332	FALSE	FALSE	FALSE	TRUE	FALSE	TRUE
CAP1	23.1527	23.9579	23.8894	23.1561	22.8857	23.0003	22.9074	21.4474	21.9696	23.3552	23.504	24.2001	Q01518	CAP1	Q01518	FALSE	0	-0.646172	1.95147	0.652648	0.813865	0.28422	0.259699	2.85734	1.55852	0.656018	0.0239154	-0.392949	2.20469	0.905871	0.636441	0.148656	-1.97122	0.626423	-0.672396	0.887985	0.270854	-2.87709	-0.279448	-1.57827	0.114077	0.0226144	FALSE	FALSE	FALSE	FALSE	FALSE	FALSE
CAPG	21.4931	21.131	21.3178	22.8941	21.4865	22.9944	21.8063	20.4577	20.9248	20.945	21.1949	20.5459	P40121	CAPG	P40121	FALSE	0	-2.54445	0.25569	-1.14438	0.482556	0.0972913	-1.14904	1.65111	0.251035	0.931616	0.693821	-0.00465534	2.79549	1.39542	0.403433	0.0506158	0.163002	2.96315	1.56307	0.596551	0.0325406	-1.23241	1.56773	0.167658	0.813567	0.792094	FALSE	FALSE	FALSE	FALSE	FALSE	FALSE
CAST	0	17.4855	17.685	18.0466	17.6223	18.1163	18.0255	17.6723	18.0239	17.6792	0	17.5914	P20810	CAST	P20810	TRUE	2	-18.9262	6.51637	-6.2049	0.822819	0.297668	-18.905	6.53757	-6.18371	0.89735	0.29922	-12.7001	12.7425	0.0211952	0.879805	0.997068	-6.54975	18.8928	6.17152	0.894794	0.300115	-6.57095	18.8716	6.15033	0.646003	0.301677	FALSE	FALSE	FALSE	FALSE	FALSE	FALSE
CBX3	21.0355	21.3332	0	22.1578	0	0	20.7022	20.3379	0	0	0	0	Q13185	CBX3	Q13185	TRUE	7	-12.0719	25.5458	6.73697	0.882965	0.437759	-18.366	19.2517	0.442877	0.942321	0.958582	-25.1029	12.5147	-6.29409	0.807502	0.467479	-11.4229	26.1948	7.38594	0.911273	0.396572	-5.12881	32.4889	13.68	0.452766	0.133951	FALSE	FALSE	FALSE	FALSE	FALSE	FALSE
CCAR2	22.0025	0	0	0	21.7389	21.2086	21.5219	21.0299	21.2736	22.328	0	0	Q8N163	CCAR2	Q8N163	TRUE	5	-26.3553	12.392	-6.98164	0.882183	0.435064	-33.3146	5.43265	-13.941	0.851777	0.137627	-26.3329	12.4143	-6.95933	0.799604	0.436481	-12.5005	26.2468	6.87314	0.916976	0.441986	-5.54115	33.2061	13.8325	0.461965	0.140346	FALSE	FALSE	FALSE	FALSE	FALSE	FALSE
CCDC124	17.768	17.722	18.0613	18.0212	17.7452	18.374	18.9007	18.6345	18.4812	18.7255	18.6127	18.0016	Q96CT7	CCDC124	Q96CT7	FALSE	0	-1.28741	0.894633	-0.196388	0.928424	0.692693	-1.91273	0.269315	-0.821706	0.843195	0.122309	-1.71634	0.465703	-0.625318	0.709455	0.226371	-1.49078	0.691262	-0.399759	0.915284	0.427682	-0.865461	1.31658	0.225559	0.785719	0.650374	FALSE	FALSE	FALSE	FALSE	FALSE	FALSE
CCDC47	17.5131	0	0	20.7628	19.3919	0	0	0	0	20.264	0	19.4808	Q96A33	CCDC47	Q96A33	TRUE	7	-24.5125	9.41807	-7.5472	0.846186	0.339661	-11.1276	22.803	5.8377	0.915917	0.45538	-3.58037	30.3502	13.3849	0.572466	0.107708	-16.8287	17.1019	0.136604	0.950118	0.98583	-30.2136	3.71698	-13.2483	0.413984	0.110843	FALSE	FALSE	FALSE	FALSE	FALSE	FALSE
CCDC50	16.3949	0	0	0	16.2926	16.924	15.9006	15.9753	0	0	0	0	Q8IVM0	CCDC50	Q8IVM0	TRUE	7	-20.0317	8.81715	-5.60725	0.871412	0.401145	-19.5848	9.26403	-5.16037	0.914361	0.438288	-13.9775	14.8713	0.446882	0.875467	0.945526	-3.3522	25.4966	11.0722	0.81155	0.11621	-3.79908	25.0497	10.6253	0.446238	0.129647	FALSE	FALSE	FALSE	FALSE	FALSE	FALSE
CCDC6	19.2787	18.9569	19.3637	19.3981	19.2336	19.6264	0	0	18.7613	0	0	0	Q16204	CCDC6	Q16204	TRUE	5	-9.82445	9.38526	-0.219591	0.949258	0.959784	3.34115	22.5509	12.946	0.568951	0.0139202	3.56075	22.7705	13.1656	0.150052	0.0128125	9.81452	29.0242	19.4194	0.0298513	0.00138222	-3.35109	15.8586	6.25377	0.516225	0.174354	FALSE	FALSE	FALSE	TRUE	FALSE	TRUE
CCNK	20.3776	19.4221	0	21.108	20.3488	0	18.9398	19.3869	19.1398	0	19.2751	20.0354	O75909	CCNK	O75909	TRUE	3	-18.3172	17.2124	-0.552359	0.948446	0.945329	-23.6538	11.8758	-5.88896	0.917315	0.471538	-23.1014	12.4282	-5.33661	0.817785	0.512973	-17.0494	18.4802	0.715421	0.94809	0.929234	-11.7128	23.8168	6.05203	0.729053	0.459731	FALSE	FALSE	FALSE	FALSE	FALSE	FALSE
CCNT1	21.4984	21.249	21.4506	21.5278	21.8535	21.9705	20.7647	21.2641	21.3035	19.6888	19.6732	21.2632	O60563	CCNT1	O60563	FALSE	0	-1.6913	0.922133	-0.384582	0.903026	0.521346	-1.01811	1.59532	0.288608	0.928142	0.628533	-0.633525	1.9799	0.67319	0.738049	0.273034	0.268788	2.88222	1.5755	0.518808	0.0234148	-0.404402	2.20903	0.902313	0.481431	0.152273	FALSE	FALSE	FALSE	FALSE	FALSE	FALSE
CCT8	22.8794	23.9298	23.2246	22.6686	22.3046	22.1108	22.2787	20.4591	20.8475	23.6133	23.547	23.3759	P50990	CCT8	P50990	FALSE	0	-0.411325	2.37788	0.983276	0.631533	0.14478	0.754883	3.54408	2.14948	0.457399	0.00696025	-0.228393	2.56081	1.16621	0.536347	0.0909085	-2.54535	0.243849	-1.15075	0.786092	0.0946104	-3.71156	-0.922359	-2.31696	0.021619	0.00457688	FALSE	FALSE	FALSE	FALSE	TRUE	TRUE
CCZ1B	18.7119	0	0	0	18.675	18.8909	19.6273	19.23	19.469	18.9793	18.4563	18.4833	P86790	CCZ1B	P86790	TRUE	3	-19.8227	7.25338	-6.28467	0.836117	0.320179	-26.7428	0.333281	-13.2048	0.768988	0.0547396	-20.4582	6.61796	-6.9201	0.739908	0.276539	-19.6557	7.42039	-6.11766	0.901178	0.332491	-12.7356	14.3405	0.802438	0.829545	0.896033	FALSE	FALSE	FALSE	FALSE	FALSE	FALSE
CD2AP	24.2946	23.3676	23.8272	24.0823	24.0264	24.3729	23.7201	24.1567	23.7585	22.9762	22.4492	22.7313	Q9Y5K6	CD2AP	Q9Y5K6	FALSE	0	-1.43854	0.777091	-0.330726	0.901849	0.515528	-1.15642	1.05922	-0.0486006	0.941106	0.922933	-0.825692	1.38994	0.282125	0.830312	0.577817	0.333851	2.54948	1.44167	0.429783	0.0164887	0.0517256	2.26736	1.15954	0.218054	0.0420942	FALSE	FALSE	FALSE	FALSE	FALSE	FALSE
CD44	0	0	0	23.0958	22.7064	0	0	0	0	0	0	0	P16070	CD44	P16070	TRUE	10	-26.9691	-3.56565	-15.2674	0.0437677	0.0162882	-11.7017	11.7017	0	0.943668	1	3.56565	26.9691	15.2674	0.170029	0.0162882	3.56565	26.9691	15.2674	0.426621	0.0162882	-11.7017	11.7017	0	0.842923	1	TRUE	FALSE	FALSE	FALSE	FALSE	TRUE
CDC23	19.2105	0	0	0	19.5931	18.799	18.7178	0	0	0	0	0	Q9UJX2	CDC23	Q9UJX2	TRUE	8	-23.2192	10.4315	-6.39386	0.874854	0.41137	-16.6611	16.9896	0.164252	0.943117	0.982821	-10.2673	23.3835	6.55811	0.789152	0.399936	-4.02802	29.6228	12.7974	0.814413	0.11913	-10.5861	23.0646	6.23925	0.713604	0.422339	FALSE	FALSE	FALSE	FALSE	FALSE	FALSE
CDK5RAP3	0	0	0	0	0	0	0	17.9936	0	0	17.8834	16.7398	Q96JB5	CDK5RAP3	Q96JB5	TRUE	9	-12.7602	12.7602	0	0.951391	1	-18.758	6.7623	-5.99786	0.899735	0.31449	-18.758	6.7623	-5.99786	0.758055	0.31449	-24.3012	1.2191	-11.5411	0.744898	0.070976	-18.3034	7.21696	-5.5432	0.677409	0.35054	FALSE	FALSE	FALSE	FALSE	FALSE	FALSE
CDV3	18.9077	17.3688	17.1074	0	18.5191	0	20.0952	20.6389	20.093	19.9012	19.3067	0	Q9UKY7	CDV3	Q9UKY7	TRUE	3	-2.17558	25.4188	11.6216	0.44675	0.0889341	-16.2783	11.3161	-2.48107	0.931574	0.692981	-27.8999	-0.305495	-14.1027	0.381734	0.0460833	-20.6935	6.90091	-6.89627	0.891792	0.286612	-6.59078	21.0036	7.20641	0.618948	0.266901	FALSE	FALSE	FALSE	FALSE	FALSE	FALSE
CEP152	17.8781	0	17.8563	0	17.5514	17.8707	17.2785	17.5007	17.4267	0	0	16.9868	O94986	CEP152	O94986	TRUE	4	-15.3832	15.5914	0.10409	0.950783	0.988172	-20.9778	9.99681	-5.49049	0.914734	0.4423	-21.0819	9.89272	-5.59458	0.798936	0.433997	-9.34218	21.6324	6.14511	0.910623	0.391866	-3.7476	27.227	11.7397	0.430884	0.120222	FALSE	FALSE	FALSE	FALSE	FALSE	FALSE
CEP170	19.5647	17.6742	18.5681	20.3043	17.3199	20.4346	20.2617	20.4761	19.5788	18.6296	18.0984	19.2934	Q5SW79	CEP170	Q5SW79	FALSE	0	-2.87035	1.36905	-0.750652	0.884394	0.442778	-3.62292	0.616475	-1.50322	0.85432	0.142723	-2.87227	1.36713	-0.752573	0.800979	0.441651	-1.44054	2.79886	0.679156	0.921687	0.486069	-0.68797	3.55143	1.43173	0.49489	0.16041	FALSE	FALSE	FALSE	FALSE	FALSE	FALSE
CFL1	0	27.1853	26.8976	26.2122	25.6614	0	25.553	25.1614	0	25.8607	0	27.3517	P23528	CFL1	P23528	TRUE	4	-26.0156	27.4884	0.736427	0.948801	0.951588	-25.6292	27.8748	1.1228	0.941222	0.926258	-26.3656	27.1384	0.386377	0.877951	0.974587	-27.1983	26.3057	-0.446285	0.94959	0.970648	-27.5847	25.9193	-0.832662	0.836159	0.945272	FALSE	FALSE	FALSE	FALSE	FALSE	FALSE
CHD7	19.5658	0	0	0	0	0	19.2163	18.9886	18.0121	18.579	0	16.9972	Q9P2D1	CHD7	Q9P2D1	TRUE	6	-7.00646	20.0503	6.52194	0.82613	0.302971	-25.7455	1.31134	-12.2171	0.796793	0.0713375	-32.2674	-5.21059	-18.739	0.145496	0.0121605	-25.3871	1.66966	-11.8587	0.760227	0.0785565	-6.64815	20.4087	6.88026	0.628733	0.278808	FALSE	FALSE	FALSE	FALSE	FALSE	FALSE
CHD8	0	0	0	0	0	0	19.2258	19.3838	0	0	0	0	Q9HCK8	CHD8	Q9HCK8	TRUE	10	-9.87704	9.87704	0	0.951391	1	-22.7469	-2.99285	-12.8699	0.590666	0.0163896	-22.7469	-2.99285	-12.8699	0.170521	0.0163896	-9.87704	9.87704	0	0.950601	1	2.99285	22.7469	12.8699	0.0802167	0.0163896	FALSE	FALSE	FALSE	FALSE	FALSE	FALSE
CHMP4B	0	16.8689	0	0	0	0	17.4567	17.5983	17.3553	18.9632	0	0	Q9H444	CHMP4B	Q9H444	TRUE	7	-7.33643	18.5824	5.62297	0.851564	0.351091	-24.8065	1.11227	-11.8471	0.79277	0.0685042	-30.4295	-4.5107	-17.4701	0.157083	0.01391	-19.2805	6.63834	-6.32106	0.894266	0.297668	-1.81036	24.1084	11.149	0.352346	0.0833335	FALSE	FALSE	FALSE	FALSE	FALSE	FALSE
CHMP5	18.2115	17.5567	18.5244	18.2021	18.9934	19.8681	20.8261	20.7204	19.1342	19.4545	18.7014	19.7445	Q9NZZ3	CHMP5	Q9NZZ3	FALSE	0	-2.53228	0.684945	-0.923666	0.762615	0.22559	-3.73799	-0.520765	-2.12938	0.580837	0.0151967	-2.81432	0.402901	-1.20571	0.601047	0.123882	-1.88756	1.32967	-0.278946	0.937796	0.703316	-0.681846	2.53538	0.926765	0.578335	0.224166	FALSE	FALSE	FALSE	FALSE	FALSE	FALSE
CHORDC1	20.9677	0	0	20.2601	20.3038	20.9339	20.5416	20.5489	20.3972	19.607	0	0	Q9UHD1	CHORDC1	Q9UHD1	TRUE	4	-28.1625	1.14241	-13.51	0.336122	0.0665648	-28.1591	1.14578	-13.5067	0.789956	0.0666208	-14.6491	14.6558	0.00336679	0.88001	0.999596	-0.688858	28.616	13.9636	0.715923	0.0594312	-0.692225	28.6127	13.9602	0.285779	0.0594813	FALSE	FALSE	FALSE	FALSE	FALSE	FALSE
CISD2	0	0	0	0	0	0	17.914	17.4079	0	18.8011	18.859	0	Q8N5K1	CISD2	Q8N5K1	TRUE	8	-13.1822	13.1822	0	0.951391	1	-24.9562	1.40823	-11.774	0.800304	0.0739568	-24.9562	1.40823	-11.774	0.490578	0.0739568	-25.7356	0.628864	-12.5534	0.716357	0.0595823	-13.9616	12.4029	-0.779369	0.829581	0.896294	FALSE	FALSE	FALSE	FALSE	FALSE	FALSE
CKAP4	22.7872	23.5541	23.4802	22.3854	23.2677	22.6567	22.8908	21.8228	22.2107	24.3566	24.3976	23.5249	Q07065	CKAP4	Q07065	FALSE	0	-0.779714	1.78753	0.503906	0.869862	0.396708	-0.317884	2.24936	0.965735	0.843406	0.122655	-0.82179	1.74545	0.46183	0.799416	0.435779	-2.60669	-0.0394541	-1.32307	0.663264	0.0446459	-3.06852	-0.501284	-1.7849	0.066387	0.011927	FALSE	FALSE	FALSE	FALSE	FALSE	FALSE
CKAP5	20.9551	22.1639	19.7292	21.3188	21.7089	21.0584	21.925	22.2515	21.3828	20.6384	20.136	22.0775	Q14008	CKAP5	Q14008	FALSE	0	-2.17592	1.35067	-0.412626	0.917832	0.608546	-2.66701	0.859582	-0.903712	0.893243	0.275353	-2.25438	1.27221	-0.491086	0.823949	0.543457	-1.35189	2.1747	0.411408	0.931939	0.609588	-0.8608	2.66579	0.902494	0.626443	0.275958	FALSE	FALSE	FALSE	FALSE	FALSE	FALSE
CLASP1	0	0	0	0	0	0	18.0588	17.3988	0	0	0	0	Q7Z460	CLASP1	Q7Z460	TRUE	10	-9.08317	9.08317	0	0.951391	1	-20.9023	-2.73601	-11.8192	0.5915	0.0164972	-20.9023	-2.73601	-11.8192	0.171038	0.0164972	-9.08317	9.08317	0	0.950601	1	2.73601	20.9023	11.8192	0.0804711	0.0164972	FALSE	FALSE	FALSE	FALSE	FALSE	FALSE
CLASRP	0	17.0542	17.5407	17.6772	17.5445	0	17.2765	17.1255	17.8077	16.9337	0	17.2418	Q8N2M8	CLASRP	Q8N2M8	TRUE	3	-15.5313	15.1134	-0.208953	0.950141	0.976004	-21.194	9.45073	-5.87162	0.91134	0.407605	-20.985	9.65968	-5.66266	0.796144	0.423853	-14.9736	15.6711	0.348753	0.949212	0.959962	-9.31093	21.3338	6.01142	0.701921	0.39698	FALSE	FALSE	FALSE	FALSE	FALSE	FALSE
CLINT1	21.4353	22.4331	22.0286	21.8076	21.2184	20.9234	21.2126	19.9623	20.3827	20.2028	20.3532	22.6934	Q14677	CLINT1	Q14677	FALSE	0	-1.11691	2.41527	0.649183	0.879558	0.426257	-0.319621	3.21256	1.44647	0.824526	0.0967165	-0.968803	2.56338	0.797286	0.765757	0.332942	-1.53274	1.99943	0.233345	0.941354	0.771278	-2.33003	1.20215	-0.563941	0.739362	0.487506	FALSE	FALSE	FALSE	FALSE	FALSE	FALSE
CLIP1	0	0	0	0	0	0	18.5067	17.7141	17.7096	17.5263	0	0	P30622	CLIP1	P30622	TRUE	8	-8.98514	8.98514	0	0.951391	1	-26.962	-8.99169	-17.9768	0.174821	0.00147866	-26.962	-8.99169	-17.9768	0.0147513	0.00147866	-14.8273	3.14303	-5.84211	0.85352	0.174895	3.14957	21.1199	12.1347	0.0730266	0.0137859	FALSE	FALSE	TRUE	FALSE	FALSE	TRUE
CLTA	0	0	0	0	19.8001	0	19.2333	19.6843	19.553	21.1621	21.4079	0	P09496	CLTA	P09496	TRUE	6	-21.4352	8.23509	-6.60004	0.846171	0.33963	-34.3253	-4.65508	-19.4902	0.585599	0.0157577	-27.7253	1.94495	-12.8902	0.510356	0.0807788	-22.4251	7.24514	-7.58998	0.889299	0.276133	-9.53494	20.1353	5.30019	0.72068	0.438881	FALSE	FALSE	FALSE	FALSE	FALSE	FALSE
CNN2	19.4729	0	0	0	19.5216	17.3056	17.0037	19.1105	18.3823	0	0	0	Q99439	CNN2	Q99439	TRUE	6	-19.5321	7.96254	-5.78478	0.857689	0.365111	-25.4219	2.07278	-11.6745	0.815093	0.086743	-19.6371	7.85755	-5.88977	0.774862	0.356887	-1.47157	26.0231	12.2758	0.751338	0.0740149	4.4182	31.9128	18.1655	0.0775362	0.0153274	FALSE	FALSE	FALSE	FALSE	FALSE	FALSE
COMMD8	0	0	0	0	0	0	17.3708	18.4041	0	0	0	0	Q9NX08	COMMD8	Q9NX08	TRUE	10	-9.17018	9.17018	0	0.951391	1	-21.0952	-2.7548	-11.925	0.592006	0.016546	-21.0952	-2.7548	-11.925	0.171271	0.016546	-9.17018	9.17018	0	0.950601	1	2.7548	21.0952	11.925	0.0805856	0.016546	FALSE	FALSE	FALSE	FALSE	FALSE	FALSE
COPG2	24.0996	23.2541	23.5687	23.77	23.7012	23.8497	24.165	24.3105	24.2646	23.7174	23.2757	23.6613	Q9UBF2	COPG2	Q9UBF2	FALSE	0	-1.19551	0.929877	-0.132815	0.937165	0.783275	-1.6686	0.456785	-0.605907	0.883449	0.228602	-1.53578	0.5896	-0.473093	0.768278	0.339331	-0.840548	1.28484	0.222145	0.934418	0.646796	-0.367455	1.75793	0.695237	0.51352	0.17251	FALSE	FALSE	FALSE	FALSE	FALSE	FALSE
CORO1B	0	20.5078	20.5424	20.3587	0	0	0	0	0	0	0	0	Q9BR76	CORO1B	Q9BR76	TRUE	9	-7.85433	21.6486	6.89715	0.834305	0.316913	-1.06809	28.4349	13.6834	0.787792	0.0652246	-7.96524	21.5377	6.78624	0.762236	0.324316	-7.96524	21.5377	6.78624	0.899664	0.324316	-14.7515	14.7515	0	0.842923	1	FALSE	FALSE	FALSE	FALSE	FALSE	FALSE
CORO1C	20.402	20.7898	20.5446	20.7057	19.7422	20.9869	20.9228	21.2225	21.6445	0	0	0	Q9ULV4	CORO1C	Q9ULV4	TRUE	3	-1.08154	1.28263	0.100545	0.942451	0.851332	-1.86653	0.497639	-0.684445	0.881837	0.222044	-1.96707	0.397094	-0.78499	0.65765	0.166796	19.2962	21.6603	20.4783	8.75964e-15	3.21988e-11	20.0812	22.4453	21.2632	7.24958e-15	2.31405e-11	FALSE	FALSE	FALSE	TRUE	TRUE	TRUE
CRYBG1	0	0	0	0	0	0	17.1942	0	20.2028	0	0	0	Q9Y4K1	CRYBG1	Q9Y4K1	TRUE	10	-9.66112	9.66112	0	0.951391	1	-22.1268	-2.80454	-12.4657	0.598802	0.0171689	-22.1268	-2.80454	-12.4657	0.17667	0.0171689	-9.66112	9.66112	0	0.950601	1	2.80454	22.1268	12.4657	0.0819943	0.0171689	FALSE	FALSE	FALSE	FALSE	FALSE	FALSE
CSDE1	20.6361	21.1887	21.824	0	0	17.3592	18.3448	18.8173	19.1668	19.5753	18.2587	19.2867	O75534	CSDE1	O75534	TRUE	2	6.49468	24.365	15.4298	0.0052727	0.00365643	-6.49522	11.3751	2.43995	0.923339	0.551181	-21.9251	-4.05474	-12.9899	0.123345	0.00949965	-22.189	-4.31866	-13.2538	0.264961	0.00854852	-9.19908	8.67124	-0.263919	0.836518	0.94806	TRUE	FALSE	FALSE	FALSE	FALSE	TRUE
CSRP1	18.6819	19.004	0	18.2609	17.0213	20.1647	20.416	19.1702	20.5262	20.5445	20.6895	19.2216	P21291	CSRP1	P21291	TRUE	1	-15.7133	3.87271	-5.92032	0.736725	0.204015	-17.2685	2.31753	-7.47549	0.840468	0.117975	-11.3482	8.23785	-1.55518	0.852601	0.727077	-11.4626	8.12345	-1.66958	0.93806	0.708043	-9.90743	9.67862	-0.114402	0.840449	0.979443	FALSE	FALSE	FALSE	FALSE	FALSE	FALSE
CSTF2	0	0	0	0	20.0567	0	19.0279	20.1951	20.5038	20.1722	20.5545	20.1236	P33240	CSTF2	P33240	TRUE	5	-16.9685	3.59735	-6.68558	0.692712	0.174915	-30.1919	-9.626	-19.9089	0.206268	0.00182164	-23.5063	-2.94042	-13.2233	0.179386	0.0174434	-23.8808	-3.31491	-13.5978	0.409968	0.0152725	-10.6574	9.90844	-0.37449	0.834952	0.935987	FALSE	FALSE	FALSE	FALSE	FALSE	FALSE
CSTF2T	21.2663	19.9046	21.1567	19.9428	20.4065	21.3664	20.9646	21.4097	21.5401	20.3591	20.2092	20.445	Q9H0L4	CSTF2T	Q9H0L4	FALSE	0	-1.16375	1.57172	0.203985	0.933553	0.742975	-1.89665	0.838821	-0.528914	0.910912	0.403503	-2.10063	0.634836	-0.732899	0.728236	0.255568	-1.13358	1.60189	0.234151	0.937996	0.706893	-0.400684	2.33479	0.96705	0.466674	0.143783	FALSE	FALSE	FALSE	FALSE	FALSE	FALSE
CTNND1	0	0	0	20.3432	20.2052	18.2842	19.8996	19.5365	0	19.3682	20.5379	0	O60716	CTNND1	O60716	TRUE	5	-33.9729	-5.24881	-19.6109	0.0401023	0.013059	-27.5074	1.21669	-13.1454	0.792363	0.0682266	-7.89654	20.8275	6.4655	0.766268	0.334223	-8.05324	20.6708	6.30881	0.903461	0.345452	-14.5187	14.2054	-0.156691	0.840615	0.980801	TRUE	FALSE	FALSE	FALSE	FALSE	TRUE
CUL4B	20.2916	21.0413	21.188	18.0516	19.8294	18.7688	19.7322	19.1269	0	19.3511	17.921	20.4723	Q13620	CUL4B	Q13620	TRUE	1	-8.09027	12.0044	1.95707	0.925743	0.669147	-2.16005	17.9346	7.88728	0.83448	0.109234	-4.11712	15.9775	5.93021	0.700384	0.213965	-10.4122	9.68247	-0.364867	0.948347	0.936169	-16.3424	3.75225	-6.29508	0.537218	0.189498	FALSE	FALSE	FALSE	FALSE	FALSE	FALSE
CWC15	22.3566	21.9777	22.253	22.5069	22.35	21.8783	21.6649	21.5558	21.4832	21.3294	21.0456	20.6643	Q9P013	CWC15	Q9P013	FALSE	0	-1.11699	1.01836	-0.0493166	0.946888	0.918873	-0.439852	1.6955	0.627824	0.880164	0.21553	-0.390535	1.74482	0.67714	0.675619	0.184646	0.164291	2.29964	1.23197	0.564818	0.0283402	-0.512849	1.6225	0.554826	0.620856	0.269168	FALSE	FALSE	FALSE	FALSE	FALSE	FALSE
DAP	18.8128	18.1627	17.9937	18.6374	18.5685	18.7872	20.1599	18.5257	20.5691	18.5437	18.632	17.2837	P51397	DAP	P51397	FALSE	0	-1.90349	1.22088	-0.341302	0.92111	0.632201	-2.99069	0.133685	-1.4285	0.792678	0.0684413	-2.64939	0.474987	-1.0872	0.637426	0.149436	-1.05095	2.07343	0.511239	0.92078	0.477055	0.0362521	3.16063	1.59844	0.234709	0.0459028	FALSE	FALSE	FALSE	FALSE	FALSE	FALSE
DBN1	0	20.2115	0	19.7065	19.2989	18.8954	19.8206	18.4715	19.5817	21.9137	21.1692	18.2795	Q16643	DBN1	Q16643	TRUE	2	-23.0625	-2.06376	-12.5631	0.0831066	0.0242156	-23.0535	-2.05473	-12.5541	0.658548	0.0242924	-10.4903	10.5084	0.00902984	0.87992	0.998486	-11.6532	9.34552	-1.15385	0.943126	0.808794	-11.6622	9.33649	-1.16288	0.816105	0.807332	FALSE	FALSE	FALSE	FALSE	FALSE	FALSE
DBNL	18.994	19.023	0	19.7223	20.6889	20.5864	20.8613	21.3942	21.4903	19.7613	19.2473	18.5904	Q9UJU6	DBNL	Q9UJU6	TRUE	1	-17.4165	2.09606	-7.6602	0.527825	0.109178	-18.3325	1.18004	-8.57623	0.805198	0.0778555	-10.6723	8.84024	-0.91603	0.865076	0.836137	-8.62336	10.8892	1.13291	0.942639	0.798231	-7.70733	11.8052	2.04894	0.784547	0.645283	FALSE	FALSE	FALSE	FALSE	FALSE	FALSE
DCTN2	0	0	0	0	0	0	0	0	0	17.1367	17.2514	0	Q13561	DCTN2	Q13561	TRUE	10	-8.80798	8.80798	0	0.951391	1	-8.80798	8.80798	0	0.943668	1	-8.80798	8.80798	0	0.880043	1	-20.2707	-2.65472	-11.4627	0.429745	0.0164862	-20.2707	-2.65472	-11.4627	0.0804454	0.0164862	FALSE	FALSE	FALSE	FALSE	FALSE	FALSE
DDX10	18.324	0	0	0	0	0	18.7494	0	19.0407	0	0	0	Q13206	DDX10	Q13206	TRUE	9	-7.32919	19.5452	6.10799	0.841237	0.329794	-19.9259	6.94847	-6.4887	0.897832	0.302218	-26.0339	0.840488	-12.5967	0.453707	0.0629136	-13.4372	13.4372	0	0.950601	1	-0.840488	26.0339	12.5967	0.296903	0.0629136	FALSE	FALSE	FALSE	FALSE	FALSE	FALSE
DDX3X	0	0	0	0	20.192	0	20.306	18.0631	0	0	0	0	O00571	DDX3X	O00571	TRUE	9	-20.9796	7.51821	-6.73068	0.831651	0.312247	-27.0386	1.45919	-12.7897	0.798744	0.0727755	-20.3079	8.18987	-6.05901	0.776093	0.360319	-7.51821	20.9796	6.73068	0.897311	0.312247	-1.45919	27.0386	12.7897	0.325557	0.0727755	FALSE	FALSE	FALSE	FALSE	FALSE	FALSE
DDX42	23.3553	22.1156	0	21.2746	20.2945	19.7967	19.0177	19.4104	21.4025	0	0	0	Q86XP3	DDX42	Q86XP3	TRUE	4	-17.001	6.40433	-5.29831	0.842177	0.331623	-16.4892	6.91609	-4.78655	0.908108	0.378065	-11.1909	12.2144	0.511762	0.873485	0.923178	8.75264	32.1579	20.4553	0.0973305	0.003404	8.24088	31.6462	19.9435	0.0167869	0.00395074	FALSE	FALSE	FALSE	FALSE	TRUE	TRUE
DDX46	24.3246	24.4101	24.1827	24.5652	23.8137	24.109	23.3848	23.4507	23.2964	23.1634	23.2614	23.8563	Q7L014	DDX46	Q7L014	FALSE	0	-0.938264	1.22457	0.143156	0.936094	0.770856	-0.152952	2.00989	0.928467	0.812057	0.0838609	-0.296108	1.86673	0.785311	0.617258	0.134484	-0.345812	1.81703	0.735607	0.843939	0.157787	-1.13112	1.03172	-0.0497043	0.832734	0.919273	FALSE	FALSE	FALSE	FALSE	FALSE	FALSE
DHX36	19.0045	0	0	20.4279	19.7813	0	18.4029	18.2719	19.1901	0	18.977	20.8689	Q9H2U1	DHX36	Q9H2U1	TRUE	4	-24.4817	10.3452	-7.06824	0.864278	0.381539	-29.7003	5.12667	-12.2868	0.855181	0.144512	-22.6321	12.1949	-5.21857	0.817992	0.513955	-17.2924	17.5346	0.12107	0.950184	0.987764	-12.0738	22.7531	5.33964	0.745239	0.504488	FALSE	FALSE	FALSE	FALSE	FALSE	FALSE
DHX57	0	0	0	0	0	0	18.715	0	0	16.6832	0	19.2219	Q6P158	DHX57	Q6P158	TRUE	9	-13.2871	13.2871	0	0.951391	1	-19.5254	7.04874	-6.23832	0.899815	0.315017	-19.5254	7.04874	-6.23832	0.758284	0.315017	-25.2554	1.31867	-11.9684	0.74699	0.0719413	-19.0171	7.55699	-5.73007	0.679328	0.353884	FALSE	FALSE	FALSE	FALSE	FALSE	FALSE
DHX9	25.6725	26.6901	26.6006	26.3153	25.3545	25.4634	25.4465	24.8147	25.0952	25.6684	26.1504	27.2838	Q08211	DHX9	Q08211	FALSE	0	-0.807339	2.02728	0.609971	0.85324	0.354818	-0.215064	2.61955	1.20225	0.815403	0.0870459	-0.825035	2.00958	0.592275	0.778882	0.368277	-2.07378	0.760842	-0.656467	0.899072	0.321208	-2.66605	0.168568	-1.24874	0.337227	0.0772871	FALSE	FALSE	FALSE	FALSE	FALSE	FALSE
DIDO1	20.7052	0	0	20.4306	20.371	0	19.6147	20.917	20.9823	20.1016	20.5201	19.7624	Q9BTC0	DIDO1	Q9BTC0	TRUE	3	-21.5498	8.15219	-6.6988	0.843041	0.333321	-28.4539	1.24808	-13.6029	0.792115	0.0680585	-21.7551	7.94689	-6.90411	0.76022	0.319521	-21.3785	8.32351	-6.52748	0.903414	0.345179	-14.4744	15.2276	0.376624	0.837454	0.955395	FALSE	FALSE	FALSE	FALSE	FALSE	FALSE
DIS3	0	20.7213	0	18.1069	17.4173	0	0	0	0	0	0	0	Q9Y2L1	DIS3	Q9Y2L1	TRUE	9	-18.8675	8.99891	-4.93429	0.884391	0.442768	-7.0261	20.8403	6.9071	0.895879	0.290332	-2.09181	25.7746	11.8414	0.525589	0.0865409	-2.09181	25.7746	11.8414	0.774043	0.0865409	-13.9332	13.9332	0	0.842923	1	FALSE	FALSE	FALSE	FALSE	FALSE	FALSE
DLG1	20.8092	20.7058	0	20.8127	21.0458	21.1629	19.6244	19.8776	20.0308	19.1112	19.2405	19.2606	Q12959	DLG1	Q12959	TRUE	1	-17.785	3.44742	-7.16879	0.665833	0.160504	-16.6221	4.61027	-6.00593	0.884244	0.231945	-9.45334	11.7791	1.16286	0.862242	0.809407	-8.81317	12.4192	1.80303	0.938119	0.709095	-9.97603	11.2564	0.64017	0.829293	0.894241	FALSE	FALSE	FALSE	FALSE	FALSE	FALSE
DLGAP4	17.8848	17.2573	17.7593	0	17.2534	17.8647	18.4149	18.9195	0	17.5366	17.6089	0	Q9Y2H0	DLGAP4	Q9Y2H0	TRUE	3	-9.93017	21.7856	5.92774	0.877233	0.41876	-10.6689	21.0469	5.189	0.917781	0.477107	-16.5966	15.1192	-0.738734	0.873033	0.918184	-15.867	15.8488	-0.00910507	0.950567	0.99899	-15.1283	16.5875	0.729629	0.832722	0.919188	FALSE	FALSE	FALSE	FALSE	FALSE	FALSE
DNAJB1	22.4733	22.113	22.7432	22.5183	22.4293	22.6767	22.7482	22.8767	22.5799	22.3147	22.3168	22.1864	P25685	DNAJB1	P25685	FALSE	0	-1.12065	0.924107	-0.0982726	0.941065	0.832312	-1.3141	0.730663	-0.291717	0.922134	0.533841	-1.21582	0.828936	-0.193444	0.846067	0.677985	-0.753581	1.29118	0.268799	0.928704	0.565793	-0.560136	1.48462	0.462243	0.666425	0.33225	FALSE	FALSE	FALSE	FALSE	FALSE	FALSE
DNAJC13	0	0	0	0	0	0	17.9305	18.0115	0	18.254	0	0	O75165	DNAJC13	O75165	TRUE	9	-13.0785	13.0785	0	0.951391	1	-25.0592	1.09785	-11.9807	0.792079	0.0680344	-25.0592	1.09785	-11.9807	0.471632	0.0680344	-19.1632	6.99385	-6.08467	0.89868	0.319178	-7.18253	18.9745	5.89599	0.667251	0.333577	FALSE	FALSE	FALSE	FALSE	FALSE	FALSE
DNAJC8	0	16.1981	0	0	0	0	19.025	17.2766	0	0	0	0	O75937	DNAJC8	O75937	TRUE	9	-7.04899	17.8477	5.39936	0.851636	0.35125	-19.1495	5.74717	-6.70117	0.889006	0.253543	-24.5489	0.347813	-12.1005	0.424402	0.055412	-12.4483	12.4483	0	0.950601	1	-0.347813	24.5489	12.1005	0.27172	0.055412	FALSE	FALSE	FALSE	FALSE	FALSE	FALSE
DNMBP	20.0514	18.8878	19.8222	19.6346	19.3724	20.2077	20.5594	20.5111	20.2969	19.9133	19.5821	19.7135	Q6XZF7	DNMBP	Q6XZF7	FALSE	0	-1.33771	1.03548	-0.151116	0.936824	0.779283	-2.05525	0.317929	-0.868662	0.848656	0.131739	-1.90414	0.469045	-0.717546	0.692454	0.2039	-1.18462	1.18856	0.00197182	0.950502	0.997075	-0.467073	1.90611	0.719518	0.554001	0.202772	FALSE	FALSE	FALSE	FALSE	FALSE	FALSE
DOCK7	21.1203	21.3594	0	21.7871	20.0369	0	20.782	19.5411	19.8021	0	0	21.4512	Q96N67	DOCK7	Q96N67	TRUE	4	-18.5298	18.9669	0.218578	0.950326	0.979484	-24.6302	12.8665	-5.88183	0.919225	0.49495	-24.8487	12.6479	-6.10041	0.810361	0.479508	-11.9574	25.5392	6.79091	0.915899	0.432799	-5.85701	31.6396	12.8913	0.484052	0.15382	FALSE	FALSE	FALSE	FALSE	FALSE	FALSE
DPYSL4	20.0447	19.6438	19.723	20.1305	20.2791	18.0804	21.5097	21.4233	21.1255	0	0	17.5069	O14531	DPYSL4	O14531	TRUE	2	-8.72796	9.34232	0.307181	0.948153	0.940231	-10.5841	7.48617	-1.54897	0.93224	0.706501	-10.8913	7.17899	-1.85615	0.842384	0.65241	4.62589	22.6962	13.661	0.241712	0.00772054	6.48204	24.5523	15.5172	0.0154685	0.00377605	FALSE	FALSE	FALSE	FALSE	TRUE	TRUE
DSG2	18.505	0	0	0	18.0894	0	20.3224	21.0245	21.6003	19.7556	20.1903	19.2199	Q14126	DSG2	Q14126	TRUE	4	-13.092	13.3691	0.138534	0.950437	0.981574	-28.0446	-1.5835	-14.814	0.701236	0.0321512	-28.1831	-1.72204	-14.9526	0.291906	0.0309324	-26.9227	-0.461603	-13.6921	0.660236	0.0439673	-11.9701	14.491	1.26043	0.820341	0.833777	FALSE	FALSE	FALSE	FALSE	FALSE	FALSE
EBAG9	0	19.0402	19.5419	0	19.2291	18.261	0	0	0	0	0	0	O00559	EBAG9	O00559	TRUE	8	-13.3743	14.1023	0.363994	0.948903	0.953402	-0.877559	26.599	12.8607	0.78456	0.0632202	-1.24155	26.235	12.4967	0.47698	0.0696503	-1.24155	26.235	12.4967	0.741953	0.0696503	-13.7383	13.7383	0	0.842923	1	FALSE	FALSE	FALSE	FALSE	FALSE	FALSE
EEF1A1	27.729	27.8244	28.3838	27.8562	27.3454	27.7929	27.4794	27.1627	26.6771	27.8391	27.886	28.0073	P68104	EEF1A1	P68104	FALSE	0	-0.792235	1.42065	0.314206	0.905819	0.535738	-0.233811	1.97907	0.87263	0.833439	0.107814	-0.548017	1.66486	0.558424	0.742863	0.282245	-1.3524	0.860485	-0.245955	0.933083	0.626344	-1.91082	0.302062	-0.804379	0.452991	0.134102	FALSE	FALSE	FALSE	FALSE	FALSE	FALSE
EEF1A2	25.5359	25.8034	26.0424	25.4003	24.889	25.2258	24.3917	23.9702	23.5545	24.85	24.5046	26.3465	Q05639	EEF1A2	Q05639	FALSE	0	-0.762704	2.00713	0.622215	0.843955	0.335139	0.436838	3.20668	1.82176	0.584821	0.015664	-0.185377	2.58446	1.19954	0.512573	0.0815884	-1.44695	1.32289	-0.0620295	0.947792	0.921325	-2.64649	0.123348	-1.26157	0.316033	0.0693188	FALSE	FALSE	FALSE	FALSE	FALSE	FALSE
EEF1B2	19.903	20.295	0	19.8644	0	17.9029	21.1024	20.4729	21.4331	21.9586	20.8344	0	P24534	EEF1B2	P24534	TRUE	3	-17.0226	18.643	0.810228	0.946968	0.920196	-25.4363	10.2293	-7.60349	0.905834	0.359085	-26.2465	9.41908	-8.41371	0.757308	0.312781	-19.508	16.1576	-1.67523	0.944339	0.836052	-11.0943	24.5713	6.73848	0.709838	0.413909	FALSE	FALSE	FALSE	FALSE	FALSE	FALSE
EEF1D	24.5289	23.4633	23.909	23.7787	23.9791	24.1169	21.8253	21.4016	21.9441	22.8712	23.2867	22.2035	P29692	EEF1D	P29692	FALSE	0	-1.2055	1.22313	0.00881861	0.950733	0.98722	1.02907	3.4577	2.24338	0.253223	0.00243772	1.02025	3.44888	2.23457	0.0274027	0.00249722	-0.0432209	2.38541	1.17109	0.708671	0.0569917	-2.27779	0.150845	-1.06347	0.340927	0.078786	FALSE	FALSE	TRUE	FALSE	FALSE	TRUE
EEF2	24.2867	25.5527	24.4887	23.832	24.1065	24.1947	24.1924	23.5812	23.5574	25.4215	25.6541	24.6557	P13639	EEF2	P13639	FALSE	0	-0.546789	2.01004	0.731624	0.764157	0.227011	-0.279387	2.27744	0.999026	0.835481	0.110626	-1.01101	1.54581	0.267402	0.841518	0.646598	-2.47775	0.0790788	-1.19933	0.725101	0.0627542	-2.74515	-0.188323	-1.46674	0.151863	0.0290351	FALSE	FALSE	FALSE	FALSE	FALSE	FALSE
EFHD2	21.3893	21.4574	20.6959	21.2853	21.8116	17.6494	22.1548	22.3579	22.0388	21.7803	21.8736	21.7942	Q96C19	EFHD2	Q96C19	FALSE	0	-1.32384	3.18804	0.932103	0.861108	0.373449	-3.25889	1.25299	-1.00295	0.903359	0.339948	-4.191	0.320883	-1.93506	0.519301	0.0841049	-3.82324	0.688641	-1.5673	0.839036	0.150062	-1.88818	2.6237	0.367758	0.800492	0.720188	FALSE	FALSE	FALSE	FALSE	FALSE	FALSE
EGLN1	0	0	17.1837	0	0	0	17.1277	17.2114	0	0	0	0	Q9GZT9	EGLN1	Q9GZT9	TRUE	9	-6.67828	18.1341	5.72789	0.837473	0.322671	-18.1247	6.68768	-5.71849	0.901054	0.323421	-23.8526	0.959785	-11.4464	0.466139	0.066418	-12.4062	12.4062	0	0.950601	1	-0.959785	23.8526	11.4464	0.307619	0.066418	FALSE	FALSE	FALSE	FALSE	FALSE	FALSE
EHBP1	17.8696	0	0	17.9933	17.9581	18.3777	18.2461	18.537	18.313	0	0	0	Q8NDI1	EHBP1	Q8NDI1	TRUE	5	-21.3063	-3.0001	-12.1532	0.0425387	0.0149752	-21.5619	-3.25577	-12.4089	0.564985	0.0135296	-9.40876	8.89741	-0.255676	0.875932	0.950876	8.95662	27.2628	18.1097	0.0338265	0.00158792	9.2123	27.5185	18.3654	0.00211174	0.00145172	TRUE	FALSE	FALSE	TRUE	TRUE	TRUE
EHBP1L1	0	20.5721	18.3991	0	0	0	17.095	18.4394	0	17.7198	0	0	Q8N3D4	EHBP1L1	Q8N3D4	TRUE	7	-3.25402	29.2348	12.9904	0.507591	0.103659	-15.0988	17.39	1.1456	0.939437	0.876472	-28.0892	4.39962	-11.8448	0.615223	0.133088	-22.151	10.3378	-5.90661	0.915695	0.431093	-10.3062	22.1826	5.93819	0.716382	0.428722	FALSE	FALSE	FALSE	FALSE	FALSE	FALSE
EIF3G	24.3239	25.5291	25.7072	24.8613	23.743	24.0457	23.4374	22.7107	23.1595	23.0793	0	25.1093	O75821	EIF3G	O75821	TRUE	1	-11.4011	13.3412	0.970042	0.943256	0.862806	-10.2869	14.4553	2.0842	0.932473	0.711309	-11.257	13.4853	1.11416	0.865754	0.842716	-4.21729	20.525	8.15384	0.850755	0.169658	-5.33145	19.4108	7.03968	0.583884	0.229444	FALSE	FALSE	FALSE	FALSE	FALSE	FALSE
EIF3H	0	0	0	0	0	0	23.22	22.3774	22.3974	0	0	0	O15372	EIF3H	O15372	TRUE	9	-1.05522	1.05522	0	0.951391	1	-23.7202	-21.6097	-22.6649	6.76337e-15	4.86703e-12	-23.7202	-21.6097	-22.6649	6.67838e-15	4.86703e-12	-1.05522	1.05522	0	0.950601	1	21.6097	23.7202	22.6649	7.24958e-15	4.86703e-12	FALSE	TRUE	TRUE	FALSE	TRUE	TRUE
EIF4A1	0	0	22.1305	22.2488	22.4989	22.1439	22.4588	21.8831	22.1617	23.8311	0	22.8238	P60842	EIF4A1	P60842	TRUE	3	-31.3298	1.48906	-14.9204	0.350614	0.0697449	-31.2005	1.61841	-14.791	0.797398	0.0717795	-16.2801	16.5388	0.129354	0.87891	0.986127	-9.66387	23.155	6.74557	0.9083	0.375771	-9.79322	23.0257	6.61622	0.695804	0.384587	FALSE	FALSE	FALSE	FALSE	FALSE	FALSE
EIF4B	20.5034	20.0439	19.9345	20.1447	20.332	20.1718	19.4456	16.9155	18.3741	20.8253	20.4557	18.4973	P23588	EIF4B	P23588	FALSE	0	-1.92223	1.81107	-0.0555805	0.948577	0.947642	0.0488524	3.78215	1.9155	0.747078	0.0454038	0.104433	3.83773	1.97108	0.353089	0.0406808	-1.57657	2.15673	0.29008	0.939393	0.73266	-3.54765	0.185647	-1.681	0.323456	0.0719965	FALSE	FALSE	FALSE	FALSE	FALSE	FALSE
EIF4E	20.0603	22.0426	21.6088	20.358	16.4206	19.3934	19.5027	17.9385	19.1348	17.0549	19.811	0	P06730	EIF4E	P06730	TRUE	1	-7.24064	12.2672	2.51326	0.912439	0.573428	-7.37529	12.1325	2.37861	0.926089	0.593782	-9.88855	9.61925	-0.134649	0.878045	0.975709	-3.31856	16.1892	6.43534	0.850544	0.16927	-3.18391	16.3239	6.56999	0.496541	0.161442	FALSE	FALSE	FALSE	FALSE	FALSE	FALSE
EIF4G1	22.209	22.981	21.9673	22.8485	22.9695	23.1057	22.9147	23.0352	22.7563	21.2036	22.7044	22.2314	Q04637	EIF4G1	Q04637	FALSE	0	-1.86856	0.690972	-0.588793	0.838336	0.324276	-1.7961	0.763433	-0.516332	0.908819	0.384291	-1.2073	1.35223	0.072461	0.871418	0.900656	-0.351682	2.20785	0.928083	0.828151	0.13495	-0.424143	2.13539	0.855622	0.500956	0.164238	FALSE	FALSE	FALSE	FALSE	FALSE	FALSE
EIF4G2	23.1395	22.766	0	22.7577	22.3336	23.5241	22.1596	22.4479	22.5451	22.0734	21.6323	22.4357	P78344	EIF4G2	P78344	TRUE	1	-19.3165	4.17671	-7.56992	0.698582	0.178359	-18.829	4.66426	-7.08237	0.877329	0.205118	-11.2591	12.2342	0.48755	0.873835	0.927073	-10.922	12.5713	0.824651	0.946058	0.877026	-11.4095	12.0837	0.337101	0.836707	0.949534	FALSE	FALSE	FALSE	FALSE	FALSE	FALSE
EIF4G3	17.775	18.0248	0	17.8987	19.5546	19.4569	18.7239	19.0559	18.0379	0	0	17.2556	O43432	EIF4G3	O43432	TRUE	3	-19.7682	5.69451	-7.03682	0.779381	0.242001	-19.404	6.0587	-6.67264	0.891367	0.265371	-12.3672	13.0955	0.364186	0.87583	0.949696	0.486856	25.9495	13.2182	0.657776	0.0434272	0.12267	25.5853	12.854	0.244456	0.0482568	FALSE	FALSE	FALSE	FALSE	FALSE	FALSE
EIF4H	21.6828	20.9656	21.2175	21.5723	21.5488	20.8435	21.131	21.0288	21.3247	21.6564	21.7405	21.2301	Q15056	EIF4H	Q15056	FALSE	0	-1.1491	1.08332	-0.0328917	0.948608	0.948183	-0.989054	1.24336	0.127155	0.936521	0.801967	-0.956162	1.27626	0.160046	0.85574	0.752507	-1.337	0.895414	-0.220795	0.935516	0.664377	-1.49705	0.735368	-0.380841	0.728797	0.459072	FALSE	FALSE	FALSE	FALSE	FALSE	FALSE
EIF5	23.7829	23.4563	23.5781	23.8359	23.6624	23.8415	23.929	23.8222	23.7795	23.2131	22.898	23.3241	P55010	EIF5	P55010	FALSE	0	-1.17699	0.828581	-0.174203	0.929518	0.702813	-1.24061	0.764956	-0.237828	0.926697	0.603792	-1.06641	0.939158	-0.0636251	0.870298	0.888763	-0.3679	1.63767	0.634883	0.85865	0.185333	-0.304275	1.70129	0.698508	0.475986	0.149114	FALSE	FALSE	FALSE	FALSE	FALSE	FALSE
EMD	14.4703	20.0039	0	19.5643	17.9349	0	20.1699	19.1351	18.8405	20.6396	20.4261	19.7003	P50402	EMD	P50402	TRUE	2	-14.2801	12.2634	-1.00832	0.943547	0.867023	-21.1622	5.38133	-7.89042	0.878938	0.210934	-20.1539	6.38965	-6.8821	0.736475	0.270118	-21.0273	5.51616	-7.75559	0.872115	0.218155	-14.1452	12.3983	-0.87349	0.827935	0.884646	FALSE	FALSE	FALSE	FALSE	FALSE	FALSE
EMSY	0	0	0	0	0	0	17.3903	17.4699	17.0507	0	0	0	Q7Z589	EMSY	Q7Z589	TRUE	9	-0.98604	0.98604	0	0.951391	1	-18.2897	-16.3176	-17.3037	6.76337e-15	2.87529e-11	-18.2897	-16.3176	-17.3037	6.67838e-15	2.87529e-11	-0.98604	0.98604	0	0.950601	1	16.3176	18.2897	17.3037	7.24958e-15	2.87529e-11	FALSE	TRUE	TRUE	FALSE	TRUE	TRUE
ENAH	18.1225	18.5306	0	18.1801	0	0	17.9025	0	17.7531	18.7088	0	17.1481	Q8N8S7	ENAH	Q8N8S7	TRUE	5	-12.2796	24.595	6.15767	0.891171	0.468325	-18.1048	18.7698	0.332484	0.942642	0.968273	-24.2625	12.6121	-5.82519	0.813216	0.491985	-24.3296	12.545	-5.8923	0.921794	0.487149	-18.5044	18.3702	-0.0671053	0.84216	0.993595	FALSE	FALSE	FALSE	FALSE	FALSE	FALSE
ENSA	0	0	17.9634	0	19.1596	0	19.828	20.2633	0	19.8616	18.8393	17.9299	O43768	ENSA	O43768	TRUE	5	-17.2717	16.4743	-0.398732	0.949184	0.958433	-24.249	9.49702	-7.37598	0.904382	0.34767	-23.8502	9.89575	-6.97725	0.780521	0.373076	-29.3634	4.3826	-12.4904	0.822453	0.127998	-22.3861	11.3598	-5.51315	0.735835	0.477727	FALSE	FALSE	FALSE	FALSE	FALSE	FALSE
EPB41	19.2122	0	19.2769	19.2709	19.2836	20.1831	20.0217	20.387	0	0	19.7191	17.8895	P11171	EPB41	P11171	TRUE	3	-23.935	10.436	-6.74951	0.869789	0.396504	-17.8254	16.5457	-0.639863	0.941509	0.93456	-11.0759	23.2952	6.10964	0.800824	0.441064	-10.1425	24.2285	7.04301	0.908508	0.377167	-16.2522	18.1189	0.93337	0.830746	0.904684	FALSE	FALSE	FALSE	FALSE	FALSE	FALSE
EPB41L2	21.4484	19.9948	20.7258	20.9169	19.4952	0	18.9376	0	18.6485	0	19.1544	17.9827	O43491	EPB41L2	O43491	TRUE	3	-9.74242	24.247	7.2523	0.854948	0.358697	-8.80045	25.189	8.19427	0.897941	0.302902	-16.0528	17.9367	0.941968	0.871612	0.902738	-15.9031	18.0864	1.09165	0.946475	0.887395	-16.845	17.1444	0.149684	0.841065	0.9845	FALSE	FALSE	FALSE	FALSE	FALSE	FALSE
EPB41L3	22.791	22.0956	22.4175	22.6396	22.6818	23.1319	22.8822	24.576	23.0214	22.3785	22.5848	22.7706	Q9Y2J2	EPB41L3	Q9Y2J2	FALSE	0	-1.72593	0.959896	-0.383019	0.905491	0.534005	-2.40139	0.284444	-1.05847	0.833579	0.108004	-2.01837	0.667463	-0.675453	0.743647	0.283788	-1.10318	1.58265	0.239732	0.93733	0.695083	-0.427731	2.2581	0.915184	0.48951	0.157099	FALSE	FALSE	FALSE	FALSE	FALSE	FALSE
EPRS1	21.3586	20.7366	18.4734	0	20.8082	20.1843	20.476	20.737	21.0156	21.4978	21.3286	0	P07814	EPRS1	P07814	TRUE	2	-8.66177	21.7125	6.52539	0.853575	0.355571	-15.7405	14.6338	-0.553305	0.941557	0.935963	-22.2658	8.10846	-7.07869	0.759715	0.318339	-15.7985	14.5758	-0.611323	0.948091	0.929268	-8.71979	21.6545	6.46737	0.68258	0.359656	FALSE	FALSE	FALSE	FALSE	FALSE	FALSE
ERC1	0	0	0	0	0	0	20.9682	21.3069	21.1856	20.3477	19.5088	20.1604	Q8IUD2	ERC1	Q8IUD2	TRUE	6	-1.05234	1.05234	0	0.951391	1	-22.2059	-20.1012	-21.1536	6.76337e-15	8.71764e-12	-22.2059	-20.1012	-21.1536	6.67838e-15	8.71764e-12	-21.058	-18.9533	-20.0056	8.75964e-15	1.42363e-11	0.0956104	2.2003	1.14795	0.187777	0.0357622	FALSE	TRUE	TRUE	TRUE	FALSE	TRUE
ESF1	20.067	0	19.4676	19.9811	20.0521	20.192	19.7511	19.804	20.111	19.1745	0	19.3816	Q9H501	ESF1	Q9H501	TRUE	2	-20.993	7.1993	-6.89687	0.821921	0.296263	-20.8067	7.38566	-6.71051	0.898852	0.308706	-13.9098	14.2825	0.186363	0.878131	0.976736	-6.87313	21.3192	7.22304	0.88913	0.275443	-7.05949	21.1328	7.03667	0.635284	0.287191	FALSE	FALSE	FALSE	FALSE	FALSE	FALSE
ESYT1	0	0	18.9167	0	0	0	18.3824	0	16.7284	19.2994	0	20.4197	Q9BSJ8	ESYT1	Q9BSJ8	TRUE	7	-10.3266	22.9378	6.30556	0.8752	0.41243	-22.0302	11.2342	-5.39804	0.918069	0.480598	-28.3358	4.9286	-11.7036	0.632364	0.145481	-29.8719	3.3925	-13.2397	0.799415	0.105023	-18.1683	15.0961	-1.5361	0.821117	0.838771	FALSE	FALSE	FALSE	FALSE	FALSE	FALSE
ESYT2	0	0	19.1037	0	0	17.1002	17.146	18.3169	19.6492	18.1501	18.03	0	A0FGR8	ESYT2	A0FGR8	TRUE	5	-15.3765	16.7122	0.667837	0.947368	0.926865	-28.0472	4.04153	-12.0028	0.844525	0.12451	-28.715	3.37369	-12.6707	0.571895	0.107413	-22.4043	9.68441	-6.35994	0.910684	0.392308	-9.73364	22.3551	6.31071	0.701365	0.395829	FALSE	FALSE	FALSE	FALSE	FALSE	FALSE
EVPL	0	0	0	0	0	0	17.659	20.6693	19.4136	0	20.6862	18.4269	Q92817	EVPL	Q92817	TRUE	7	-10.1419	10.1419	0	0.951391	1	-29.3892	-9.10544	-19.2473	0.225597	0.00206449	-29.3892	-9.10544	-19.2473	0.021462	0.00206449	-23.1796	-2.89582	-13.0377	0.444703	0.0174702	-3.93225	16.3515	6.20962	0.549134	0.198807	FALSE	FALSE	TRUE	FALSE	FALSE	TRUE
EXOC4	0	20.1515	0	17.9313	16.9708	0	0	0	17.7651	0	0	0	Q96A65	EXOC4	Q96A65	TRUE	8	-21.262	11.4283	-4.91687	0.901208	0.512409	-15.5496	17.1406	0.795471	0.940812	0.914543	-10.6328	22.0575	5.71234	0.802785	0.448586	-4.71109	27.9791	11.634	0.833052	0.141433	-10.4234	22.2668	5.92169	0.718085	0.432705	FALSE	FALSE	FALSE	FALSE	FALSE	FALSE
EZR	21.6836	23.6959	23.5144	22.6333	21.8404	20.8402	21.5505	19.4276	20.8363	22.093	22.2749	23.1562	P15311	EZR	P15311	FALSE	0	-0.726162	3.11279	1.19331	0.720914	0.192623	0.44034	4.27929	2.35981	0.638075	0.0214604	-0.752972	3.08598	1.1665	0.69078	0.201862	-2.65622	1.18273	-0.736747	0.912655	0.406875	-3.82272	0.0162249	-1.90325	0.257545	0.0515801	FALSE	FALSE	FALSE	FALSE	FALSE	FALSE
FAM107B	0	0	0	0	17.9468	0	18.9288	19.9745	18.263	18.6991	0	17.537	Q9H098	FAM107B	Q9H098	TRUE	6	-19.0353	7.07071	-5.98228	0.839274	0.326039	-32.1084	-6.00242	-19.0554	0.507665	0.00929605	-26.1261	-0.0201419	-13.0731	0.399283	0.0497167	-19.1494	6.95659	-6.0964	0.898335	0.317407	-6.07626	20.0297	6.97673	0.610067	0.256685	FALSE	FALSE	FALSE	FALSE	FALSE	FALSE
FAM184B	17.6143	0	17.8935	17.9622	0	0	0	0	0	0	0	0	Q9ULE4	FAM184B	Q9ULE4	TRUE	9	-7.04766	18.7447	5.8485	0.841783	0.330853	-1.06025	24.7321	11.8359	0.791443	0.067606	-6.90875	18.8836	5.98741	0.760476	0.320124	-6.90875	18.8836	5.98741	0.898863	0.320124	-12.8962	12.8962	0	0.842923	1	FALSE	FALSE	FALSE	FALSE	FALSE	FALSE
FASN	24.4461	25.2166	24.5129	24.1276	24.1	23.647	25.1462	25.3462	25.5089	24.7893	24.6019	25.3605	P49327	FASN	P49327	FALSE	0	-0.364001	1.89801	0.767003	0.662616	0.158913	-1.73961	0.522402	-0.608602	0.889041	0.253716	-2.50661	-0.244601	-1.3756	0.226327	0.022522	-2.09005	0.171961	-0.959043	0.774999	0.0871408	-0.714442	1.54757	0.416562	0.714932	0.425373	FALSE	FALSE	FALSE	FALSE	FALSE	FALSE
FEN1	0	0	0	0	0	18.4285	19.332	16.6315	18.7512	21.2926	0	0	P39748	FEN1	P39748	TRUE	7	-20.5681	8.28244	-6.14283	0.855367	0.359663	-32.6635	-3.81298	-18.2382	0.6159	0.01888	-26.5207	2.32985	-12.0954	0.534576	0.0901714	-15.38	13.4706	-0.954707	0.94634	0.884008	-3.28455	25.566	11.1407	0.420391	0.114286	FALSE	FALSE	FALSE	FALSE	FALSE	FALSE
FER	17.8628	0	0	0	18.297	18.1953	0	18.3003	17.8686	17.8025	17.4971	0	P16591	FER	P16591	TRUE	5	-24.5285	12.1088	-6.20986	0.889536	0.461882	-24.4207	12.2166	-6.10207	0.917138	0.469452	-18.2108	18.4264	0.107793	0.879199	0.989644	-17.921	18.7162	0.397583	0.949278	0.96182	-18.0288	18.6084	0.28979	0.839555	0.972166	FALSE	FALSE	FALSE	FALSE	FALSE	FALSE
FHOD1	0	20.0736	19.1177	18.7689	18.5784	0	17.6566	0	0	0	0	20.1165	Q9Y613	FHOD1	Q9Y613	TRUE	6	-18.7969	20.0262	0.614669	0.948388	0.944325	-12.2333	26.5898	7.17822	0.912952	0.423584	-12.848	25.9751	6.56355	0.806407	0.46299	-13.6679	25.1551	5.74361	0.924805	0.519174	-20.2315	18.5916	-0.819943	0.833606	0.925787	FALSE	FALSE	FALSE	FALSE	FALSE	FALSE
FIP1L1	0	19.0771	0	0	19.2852	19.4129	17.9242	18.1101	17.8721	15.7627	17.8538	0	Q6UN15	FIP1L1	Q6UN15	TRUE	4	-22.8637	9.78314	-6.5403	0.866505	0.387444	-27.9332	4.71369	-11.6097	0.853821	0.141701	-21.3929	11.254	-5.06945	0.814817	0.499192	-14.6296	18.0173	1.69383	0.943597	0.819236	-9.56016	23.0867	6.76328	0.689384	0.372179	FALSE	FALSE	FALSE	FALSE	FALSE	FALSE
FKBP3	18.1235	17.2851	0	0	0	0	17.9388	0	18.1086	17.4026	0	16.3852	Q00688	FKBP3	Q00688	TRUE	6	-3.71319	27.319	11.8029	0.561062	0.119093	-15.729	15.3032	-0.212895	0.942891	0.975856	-27.5319	3.5003	-12.0158	0.583187	0.113435	-26.7787	4.25349	-11.2626	0.827903	0.134635	-14.7629	16.2693	0.753189	0.832124	0.914761	FALSE	FALSE	FALSE	FALSE	FALSE	FALSE
FLNB	23.972	25.0782	24.8387	24.7034	23.7437	23.6243	23.5244	22.8175	22.9308	0	23.8562	24.6539	O75369	FLNB	O75369	TRUE	1	-11.8129	13.0246	0.60582	0.946612	0.914341	-10.8801	13.9575	1.53871	0.935813	0.785088	-11.4859	13.3517	0.932895	0.86834	0.868503	-4.56501	20.2725	7.85376	0.858859	0.185779	-5.4979	19.3396	6.92086	0.592953	0.238426	FALSE	FALSE	FALSE	FALSE	FALSE	FALSE
FUS	0	0	0	18.3292	0	18.557	20.5681	18.5717	18.2572	0	22.4101	0	P35637	FUS	P35637	TRUE	6	-27.1463	2.55549	-12.2954	0.467467	0.0936702	-33.9833	-4.28145	-19.1324	0.600135	0.0172946	-21.6879	8.01397	-6.83694	0.762098	0.323984	-10.0255	19.6763	4.82539	0.921091	0.480114	-3.18858	26.5132	11.6623	0.410692	0.109124	FALSE	FALSE	FALSE	FALSE	FALSE	FALSE
G3BP1	0	0	0	0	19.9482	0	0	20.8383	21.119	22.0437	21.7201	0	Q13283	G3BP1	Q13283	TRUE	7	-25.1526	11.8537	-6.64941	0.882542	0.436297	-32.4889	4.51739	-13.9858	0.842477	0.121145	-25.8395	11.1668	-7.33635	0.786756	0.3922	-26.4417	10.5646	-7.93851	0.905259	0.356241	-19.1053	17.901	-0.602157	0.835837	0.942784	FALSE	FALSE	FALSE	FALSE	FALSE	FALSE
G6PD	24.5979	26.3972	25.8713	25.0423	24.3172	24.5397	0	22.6801	22.3096	0	23.369	0	P11413	G6PD	P11413	TRUE	3	-15.579	17.5571	0.989079	0.945419	0.895292	-5.94252	27.1936	10.6255	0.869598	0.180251	-6.9316	26.2045	9.63646	0.704989	0.220138	0.275335	33.4115	16.8434	0.673398	0.047031	-9.36113	23.775	7.20693	0.677058	0.349934	FALSE	FALSE	FALSE	FALSE	FALSE	FALSE
GABPA	16.7707	16.6843	0	17.1749	0	0	0	0	0	0	0	16.5291	Q06546	GABPA	Q06546	TRUE	8	-9.432	20.2854	5.4267	0.880426	0.429126	-3.70702	26.0104	11.1517	0.843891	0.123454	-9.13372	20.5837	5.72498	0.79073	0.405155	-14.6434	15.074	0.215297	0.949725	0.974504	-20.3684	9.34902	-5.50969	0.713614	0.422361	FALSE	FALSE	FALSE	FALSE	FALSE	FALSE
GAK	18.9012	17.9967	18.949	19.3132	18.4513	19.5981	18.2164	18.7782	17.1903	0	0	0	O14976	GAK	O14976	TRUE	3	-1.89777	0.887316	-0.505229	0.881303	0.43207	-0.838508	1.94658	0.554037	0.909527	0.390639	-0.33328	2.45181	1.05927	0.593127	0.119101	17.7283	20.5134	19.1209	8.75964e-15	2.47137e-10	16.6691	19.4542	18.0616	7.24958e-15	4.06909e-10	FALSE	FALSE	FALSE	TRUE	TRUE	TRUE
GAPDH	27.7403	27.935	0	0	27.086	27.0838	26.928	26.3791	26.671	27.8759	0	0	P04406	GAPDH	P04406	TRUE	4	-23.861	24.8646	0.501825	0.949478	0.963764	-32.4638	16.2618	-8.10096	0.917203	0.47022	-32.9656	15.76	-8.60278	0.801607	0.444048	-15.5982	33.1274	8.76462	0.916257	0.435819	-6.99538	41.7302	17.3674	0.462727	0.140895	FALSE	FALSE	FALSE	FALSE	FALSE	FALSE
GAPVD1	19.9194	19.9655	19.8481	20.1506	20.4763	0	20.2078	20.31	20.1059	0	0	0	Q14C86	GAPVD1	Q14C86	TRUE	4	-4.02078	16.7582	6.36873	0.729038	0.198328	-10.6864	10.0926	-0.296891	0.942025	0.949747	-17.0551	3.72389	-6.66562	0.671281	0.180101	3.15277	23.9318	13.5423	0.427803	0.0163629	9.81839	30.5974	20.2079	0.003195	0.00176962	FALSE	FALSE	FALSE	FALSE	TRUE	TRUE
GATAD2B	19.3192	18.9297	0	18.8841	19.5208	0	19.0088	19.0103	19.1989	18.1844	18.7352	0	Q8WXI9	GATAD2B	Q8WXI9	TRUE	3	-16.7813	16.6773	-0.0519816	0.951112	0.994532	-23.0523	10.4063	-6.32303	0.911976	0.413801	-23.0004	10.4583	-6.27105	0.794346	0.417503	-16.2342	17.2244	0.495068	0.948779	0.947962	-9.96318	23.4954	6.76612	0.69509	0.383177	FALSE	FALSE	FALSE	FALSE	FALSE	FALSE
GCN1	0	0	0	0	0	0	20.801	19.7926	21.4219	0	0	0	Q92616	GCN1	Q92616	TRUE	9	-1.20814	1.20814	0	0.951391	1	-21.88	-19.4637	-20.6719	6.76337e-15	3.58994e-11	-21.88	-19.4637	-20.6719	6.67838e-15	3.58994e-11	-1.20814	1.20814	0	0.950601	1	19.4637	21.88	20.6719	7.24958e-15	3.58994e-11	FALSE	TRUE	TRUE	FALSE	TRUE	TRUE
GEMIN5	22.4743	22.2592	22.0532	19.9072	22.2255	22.3268	21.4245	21.2605	21.2019	20.5043	0	21.0327	Q8TEQ6	GEMIN5	Q8TEQ6	TRUE	1	-9.91607	11.4674	0.775688	0.94395	0.872956	-9.72518	11.6583	0.96658	0.938132	0.842127	-10.5009	10.8827	0.190892	0.877447	0.968588	-3.05094	18.3326	7.64082	0.832017	0.140023	-3.24183	18.1417	7.44993	0.475786	0.148999	FALSE	FALSE	FALSE	FALSE	FALSE	FALSE
GFPT1	0	0	0	0	0	0	0	18.6099	17.4534	0	0	20.4643	Q06210	GFPT1	Q06210	TRUE	9	-13.9305	13.9305	0	0.951391	1	-25.9516	1.9094	-12.0211	0.810617	0.0825437	-25.9516	1.9094	-12.0211	0.515156	0.0825437	-20.7519	7.10908	-6.82143	0.893879	0.29589	-8.73083	19.1302	5.19968	0.71231	0.419414	FALSE	FALSE	FALSE	FALSE	FALSE	FALSE
GNL2	18.8904	21.4315	0	0	20.2358	0	0	0	0	18.1227	0	22.4315	Q13823	GNL2	Q13823	TRUE	7	-11.3027	24.6935	6.69536	0.877911	0.42092	-4.55746	31.4387	13.4406	0.84487	0.125091	-11.2528	24.7434	6.74528	0.794372	0.417595	-24.7709	11.2253	-6.77279	0.913805	0.415771	-31.5162	4.48003	-13.5181	0.435912	0.123207	FALSE	FALSE	FALSE	FALSE	FALSE	FALSE
GPRC5A	0	0	0	0	0	0	17.1484	17.0236	0	0	0	0	Q8NFJ5	GPRC5A	Q8NFJ5	TRUE	10	-8.75331	8.75331	0	0.951391	1	-20.144	-2.63734	-11.3906	0.591464	0.0164925	-20.144	-2.63734	-11.3906	0.171016	0.0164925	-8.75331	8.75331	0	0.950601	1	2.63734	20.144	11.3906	0.0804601	0.0164925	FALSE	FALSE	FALSE	FALSE	FALSE	FALSE
GPRIN1	18.9928	0	0	0	18.203	17.5658	0	17.9815	0	17.707	0	0	Q7Z2K8	GPRIN1	Q7Z2K8	TRUE	7	-24.1005	12.9165	-5.592	0.900834	0.510613	-18.1714	18.8456	0.337119	0.942632	0.967954	-12.5794	24.4376	5.92912	0.811893	0.486144	-12.4879	24.5291	6.02063	0.921042	0.479632	-18.417	18.6	0.0915117	0.841885	0.991299	FALSE	FALSE	FALSE	FALSE	FALSE	FALSE
GSDME	20.748	20.344	20.6475	20.4069	20.8357	20.9029	20.9949	21.2341	21.2059	20.4523	20.1636	20.5984	O60443	GSDME	O60443	FALSE	0	-1.17257	0.901843	-0.135364	0.936367	0.773987	-1.60234	0.472076	-0.565131	0.887895	0.248246	-1.46697	0.60744	-0.429767	0.780209	0.372156	-0.726809	1.34761	0.310399	0.924387	0.514533	-0.297042	1.77737	0.740166	0.462217	0.140528	FALSE	FALSE	FALSE	FALSE	FALSE	FALSE
GSE1	0	0	18.1725	18.3704	0	18.1413	0	0	0	0	0	0	Q14687	GSE1	Q14687	TRUE	9	-19.2646	7.03844	-6.11308	0.835794	0.319593	-7.09401	19.209	6.05751	0.901103	0.323764	-0.980939	25.3221	12.1706	0.463816	0.0657472	-0.980939	25.3221	12.1706	0.73275	0.0657472	-13.1515	13.1515	0	0.842923	1	FALSE	FALSE	FALSE	FALSE	FALSE	FALSE
GSN	17.8825	18.7125	0	0	19.7496	0	18.8626	0	17.7015	17.6331	0	0	P06396	GSN	P06396	TRUE	6	-13.2662	24.4966	5.61516	0.902171	0.517103	-18.8711	18.8917	0.0103061	0.943638	0.999039	-24.4863	13.2765	-5.60485	0.818808	0.517854	-18.1759	19.5869	0.705468	0.948279	0.934331	-12.5711	25.1917	6.31032	0.732228	0.468029	FALSE	FALSE	FALSE	FALSE	FALSE	FALSE
GSPT2	17.7177	19.7392	0	17.456	17.6948	18.2639	21.7833	17.4945	21.5208	21.4349	18.5588	16.9422	Q8IYD1	GSPT2	Q8IYD1	TRUE	1	-15.385	4.74647	-5.31926	0.796835	0.26171	-17.8463	2.28519	-7.78054	0.837841	0.114015	-12.527	7.60445	-2.46128	0.832915	0.592803	-11.2394	8.89201	-1.17372	0.942601	0.797412	-8.77817	11.3533	1.28756	0.81121	0.778338	FALSE	FALSE	FALSE	FALSE	FALSE	FALSE
GTF2F1	0	0	0	0	0	0	17.5333	17.4133	18.0666	17.6693	18.579	0	P35269	GTF2F1	P35269	TRUE	7	-9.29241	9.29241	0	0.951391	1	-26.9635	-8.37866	-17.6711	0.223633	0.00203851	-26.9635	-8.37866	-17.6711	0.0212035	0.00203851	-21.3752	-2.79033	-12.0827	0.4308	0.0165537	-3.70408	14.8807	5.58833	0.558084	0.206175	FALSE	FALSE	TRUE	FALSE	FALSE	TRUE
GTF2F2	20.6624	19.7611	19.2095	0	20.3313	20.4043	20.3142	20.2934	20.388	19.849	19.4404	19.609	P13984	GTF2F2	P13984	TRUE	1	-4.13824	16.7364	6.29911	0.737645	0.204716	-10.8915	9.98315	-0.454197	0.941128	0.923552	-17.1906	3.68404	-6.7533	0.668022	0.176789	-16.4916	4.38309	-6.05425	0.873226	0.221283	-9.73829	11.1364	0.699049	0.827647	0.88263	FALSE	FALSE	FALSE	FALSE	FALSE	FALSE
GTF2I	0	0	0	0	0	0	17.1816	0	16.8034	0	0	17.8486	P78347	GTF2I	P78347	TRUE	9	-12.5861	12.5861	0	0.951391	1	-23.9145	1.25779	-11.3283	0.797865	0.0721225	-23.9145	1.25779	-11.3283	0.484899	0.0721225	-18.5357	6.63658	-5.94954	0.897245	0.311917	-7.20733	17.9649	5.37879	0.681673	0.358032	FALSE	FALSE	FALSE	FALSE	FALSE	FALSE
GTF3C5	0	0	0	0	0	0	0	16.3633	18.104	0	0	0	Q9Y5Q8	GTF3C5	Q9Y5Q8	TRUE	10	-8.86118	8.86118	0	0.951391	1	-20.3503	-2.62791	-11.4891	0.594597	0.0167799	-20.3503	-2.62791	-11.4891	0.172791	0.0167799	-8.86118	8.86118	0	0.950601	1	2.62791	20.3503	11.4891	0.0811256	0.0167799	FALSE	FALSE	FALSE	FALSE	FALSE	FALSE
H2AZ1	20.8715	0	20.3813	19.5802	19.8761	27.3106	21.2527	20.9538	20.9089	21.8529	22.3486	21.1158	P0C0S5	H2AZ1	P0C0S5	TRUE	1	-19.7532	2.7438	-8.50467	0.567192	0.121053	-18.536	3.96096	-7.28751	0.868218	0.176288	-10.0313	12.4656	1.21716	0.862487	0.811669	-10.7653	11.7317	0.483179	0.947913	0.924535	-11.9825	10.5145	-0.733982	0.828075	0.885627	FALSE	FALSE	FALSE	FALSE	FALSE	FALSE
H2BC18	24.042	21.1645	21.9563	20.4489	24.2122	23.5946	0	20.1411	20.1293	18.2703	0	22.8629	Q5QNW6	H2BC18	Q5QNW6	TRUE	2	-15.3539	14.6254	-0.364268	0.949118	0.957255	-6.02543	23.9538	8.96419	0.878271	0.208495	-5.66117	24.3181	9.32846	0.682513	0.192208	-5.9488	24.0305	9.04083	0.86713	0.204973	-15.2773	14.702	-0.28763	0.838819	0.966241	FALSE	FALSE	FALSE	FALSE	FALSE	FALSE
H2BC21	27.6759	25.7337	24.6985	25.5377	27.2865	27.5698	24.6268	27.1108	27.4733	24.7591	25.0729	26.3727	Q16778	H2BC21	Q16778	FALSE	0	-3.22958	1.70566	-0.761959	0.898916	0.50159	-2.83521	2.10003	-0.367592	0.933972	0.743262	-2.07325	2.86199	0.394366	0.852391	0.72542	-1.07119	3.86405	1.39643	0.876789	0.231817	-1.46556	3.46968	1.00206	0.694153	0.38134	FALSE	FALSE	FALSE	FALSE	FALSE	FALSE
H2BC26	0	20.1478	20.221	0	0	19.2775	20.1198	19.5675	0	0	0	20.1582	Q8N257	H2BC26	Q8N257	TRUE	6	-13.2278	27.2886	7.03043	0.88684	0.451657	-20.031	20.4854	0.227198	0.943035	0.980265	-27.0614	13.4549	-6.80324	0.807129	0.465943	-20.5517	19.9646	-0.293558	0.949725	0.974502	-13.7485	26.7679	6.50968	0.738409	0.484835	FALSE	FALSE	FALSE	FALSE	FALSE	FALSE
H2BC5	0	27.3314	27.491	0	0	0	27.8133	23.3682	22.4192	0	28.8425	28.1261	P58876	H2BC5	P58876	TRUE	5	-2.03916	38.5874	18.2741	0.364262	0.0722411	-26.5727	14.0539	-6.25944	0.91981	0.502451	-44.8469	-4.22028	-24.5336	0.232466	0.0232379	-39.3028	1.32376	-18.9895	0.727109	0.0635195	-14.7693	25.8573	5.54404	0.760025	0.55139	FALSE	FALSE	FALSE	FALSE	FALSE	FALSE
H3-3A, H3-3B	26.5143	0	0	0	0	0	0	25.678	0	27.5734	27.6873	18.0716	P84243	H3-3A, H3-3B	P84243	TRUE	7	-10.5995	28.2757	8.8381	0.841169	0.329662	-19.1589	19.7164	0.278753	0.942855	0.974766	-27.997	10.8783	-8.55935	0.770203	0.344329	-43.8817	-5.00644	-24.4441	0.470954	0.0193537	-35.3224	3.5529	-15.8847	0.386288	0.0973467	FALSE	FALSE	FALSE	FALSE	FALSE	FALSE
H3-7	21.1632	17.0015	19.6358	19.438	20.7082	19.9575	20.9181	20.473	0	22.3895	22.3135	20.1748	Q5TEC6	H3-7	Q5TEC6	TRUE	1	-11.5846	10.0492	-0.767717	0.944134	0.875689	-5.34711	16.2867	5.4698	0.894329	0.281384	-4.5794	17.0544	6.23751	0.707623	0.223784	-12.4083	9.22552	-1.59139	0.940104	0.746315	-18.6458	2.98801	-7.8289	0.455237	0.135629	FALSE	FALSE	FALSE	FALSE	FALSE	FALSE
H3C1, H3C2, H3C3, H3C4, H3C6, H3C7, H3C8, H3C10, H3C11, H3C12	0	26.4518	25.6621	25.7844	0	0	26.3833	0	0	0	0	0	P68431	H3C1, H3C2, H3C3, H3C4, H3C6, H3C7, H3C8, H3C10, H3C11, H3C12	P68431	TRUE	8	-14.243	31.796	8.7765	0.874368	0.409892	-14.4427	31.5964	8.57686	0.912619	0.420215	-23.2192	22.8199	-0.199647	0.878795	0.984737	-14.4247	31.6143	8.59479	0.914247	0.41928	-14.2251	31.814	8.79444	0.70758	0.408974	FALSE	FALSE	FALSE	FALSE	FALSE	FALSE
H3C13, H3C14, H3C15	0	0	0	0	25.6745	25.8562	0	0	25.3737	0	0	25.9096	Q71DI3	H3C13, H3C14, H3C15	Q71DI3	TRUE	8	-39.8484	5.4946	-17.1769	0.565112	0.120383	-31.1294	14.2136	-8.4579	0.912563	0.419648	-13.9525	31.3905	8.71901	0.79098	0.405992	-14.1311	31.2119	8.54038	0.913745	0.4153	-22.8501	22.4929	-0.178623	0.841263	0.986135	FALSE	FALSE	FALSE	FALSE	FALSE	FALSE
H4C1, H4C2, H4C3, H4C4, H4C5, H4C6, H4C7, H4C8, H4C9, H4C10, H4C11, H4C12, H4C13, H4C14, H4C15, H4C16	27.3534	27.5947	27.2333	27.1066	27.1468	26.9447	27.5919	26.9432	0	28.5254	0	28.1796	P62805	H4C1, H4C2, H4C3, H4C4, H4C5, H4C6, H4C7, H4C8, H4C9, H4C10, H4C11, H4C12, H4C13, H4C14, H4C15, H4C16	P62805	TRUE	2	-19.7281	20.3836	0.32777	0.949885	0.971245	-10.8404	29.2713	9.21545	0.901261	0.324862	-11.1682	28.9435	8.88768	0.769092	0.34143	-11.8915	28.2202	8.16436	0.908958	0.380223	-20.7792	19.3325	-0.72332	0.835033	0.936606	FALSE	FALSE	FALSE	FALSE	FALSE	FALSE
HCFC1	22.2328	21.9195	21.6252	22.5931	22.7169	21.9982	22.0192	22.8565	22.7646	21.8979	21.1316	21.5343	P51610	HCFC1	P51610	FALSE	0	-1.69287	0.67238	-0.510243	0.852729	0.353673	-1.80356	0.561683	-0.62094	0.891213	0.264573	-1.29332	1.07193	-0.110696	0.865127	0.836633	-0.267811	2.09744	0.914812	0.809082	0.113784	-0.157115	2.20813	1.02551	0.346927	0.0812926	FALSE	FALSE	FALSE	FALSE	FALSE	FALSE
HDGF	0	0	26.21	0	25.0391	0	24.7515	23.9639	0	24.3384	24.817	0	P51858	HDGF	P51858	TRUE	6	-25.147	25.9276	0.390305	0.949985	0.973108	-33.0391	18.0356	-7.50177	0.921288	0.522113	-33.4294	17.6453	-7.89208	0.815266	0.501242	-33.5761	17.4986	-8.03874	0.922419	0.493535	-25.684	25.3907	-0.146666	0.841716	0.989893	FALSE	FALSE	FALSE	FALSE	FALSE	FALSE
HDGFL2	21.8217	23.0835	22.7136	22.3939	21.5712	21.5942	0	0	0	0	0	0	Q7Z4V5	HDGFL2	Q7Z4V5	TRUE	6	-0.510035	1.88297	0.686469	0.762997	0.225941	21.3431	23.7361	22.5396	6.76337e-15	1.54249e-11	20.6566	23.0496	21.8531	6.67838e-15	2.02415e-11	20.6566	23.0496	21.8531	8.75964e-15	2.02415e-11	-1.1965	1.1965	0	0.842923	1	FALSE	TRUE	TRUE	TRUE	FALSE	TRUE
HDLBP	16.8928	18.7418	0	0	0	0	0	0	0	0	0	0	Q00341	HDLBP	Q00341	TRUE	10	2.71852	21.0379	11.8782	0.0441481	0.016766	2.71852	21.0379	11.8782	0.594445	0.016766	-9.1597	9.1597	0	0.880043	1	-9.1597	9.1597	0	0.950601	1	-9.1597	9.1597	0	0.842923	1	TRUE	FALSE	FALSE	FALSE	FALSE	TRUE
HERC4	0	20.1034	19.7127	19.5104	18.1864	0	19.003	0	17.8732	18.387	18.8394	0	Q5GLZ8	HERC4	Q5GLZ8	TRUE	4	-18.643	20.0558	0.7064	0.947897	0.935831	-18.3695	20.3294	0.979948	0.94069	0.911087	-19.0759	19.623	0.273548	0.877996	0.975124	-19.1926	19.5062	0.156813	0.950115	0.985738	-19.4661	19.2327	-0.116735	0.841655	0.989383	FALSE	FALSE	FALSE	FALSE	FALSE	FALSE
HGS	19.9525	22.29	0	21.8374	0	17.9783	19.8206	18.0534	19.3366	20.3946	20.2785	22.6258	O14964	HGS	O14964	TRUE	2	-14.2012	15.819	0.808923	0.94606	0.905417	-19.9995	10.0207	-4.98938	0.917216	0.470366	-20.8084	9.21182	-5.7983	0.79038	0.403988	-22.8379	7.18238	-7.82774	0.887152	0.267594	-17.0396	12.9807	-2.02944	0.809063	0.766127	FALSE	FALSE	FALSE	FALSE	FALSE	FALSE
HINT1	24.4337	24.9744	24.8224	24.6575	23.8522	23.9817	23.5292	23.4256	23.2958	23.5835	23.3988	24.5856	P49773	HINT1	P49773	FALSE	0	-0.631636	1.79113	0.579746	0.828146	0.306293	0.115283	2.53805	1.32666	0.713962	0.0351974	-0.464463	1.9583	0.746919	0.68579	0.195955	-0.903587	1.51918	0.307794	0.929695	0.578671	-1.65051	0.772257	-0.439125	0.717977	0.43245	FALSE	FALSE	FALSE	FALSE	FALSE	FALSE
HIVEP1	21.1142	0	0	20.8053	20.4851	20.9876	21.3135	22.1464	21.6864	20.9457	20.771	0	P15822	HIVEP1	P15822	TRUE	3	-28.8704	1.42781	-13.7213	0.355564	0.070643	-29.8265	0.471722	-14.6774	0.771655	0.0560669	-16.1052	14.193	-0.956085	0.870353	0.889349	-8.29533	22.0029	6.85378	0.90108	0.33195	-7.33924	22.959	7.80986	0.623807	0.272726	FALSE	FALSE	FALSE	FALSE	FALSE	FALSE
HLCS	0	0	0	0	18.7845	19.3314	19.2193	0	19.5427	0	18.0472	0	P50747	HLCS	P50747	TRUE	7	-29.3485	3.93785	-12.7053	0.557442	0.117956	-29.5638	3.7225	-12.9207	0.836911	0.112661	-16.8585	16.4278	-0.21535	0.878173	0.977231	-9.95359	23.3327	6.68956	0.909795	0.386004	-9.73824	23.5481	6.90491	0.689062	0.371573	FALSE	FALSE	FALSE	FALSE	FALSE	FALSE
HMGA1	21.2944	20.8847	0	19.9653	0	21.1813	21.7223	21.8761	21.6323	22.9429	0	22.4095	P17096	HMGA1	P17096	TRUE	3	-18.6208	19.3091	0.344156	0.949713	0.968073	-26.6488	11.2811	-7.68385	0.908602	0.382377	-26.993	10.937	-8.028	0.776827	0.362389	-20.3669	17.5631	-1.40191	0.945795	0.87058	-12.3389	25.5911	6.6261	0.724698	0.448708	FALSE	FALSE	FALSE	FALSE	FALSE	FALSE
HMGB3	23.0808	24.4257	24.1256	24.5266	23.4631	22.562	22.6946	21.4162	0	0	0	0	O15347	HMGB3	O15347	TRUE	4	-10.9758	11.6961	0.360151	0.948377	0.944139	-2.16215	20.5097	9.17376	0.827453	0.100163	-2.5223	20.1495	8.81361	0.580929	0.112197	12.1813	34.8531	23.5172	0.02507	0.00116947	3.36772	26.0395	14.7036	0.081053	0.016748	FALSE	FALSE	FALSE	TRUE	FALSE	TRUE
HNRNPA1	25.6756	26.292	25.7845	25.9121	25.4733	25.4706	25.5516	24.6648	24.8247	25.96	26.606	26.5333	P09651	HNRNPA1	P09651	FALSE	0	-0.858564	1.45598	0.298706	0.912332	0.572778	-0.253582	2.06096	0.903688	0.835643	0.110854	-0.552288	1.76225	0.604982	0.734495	0.266513	-1.90505	0.40949	-0.747781	0.854754	0.177316	-2.51003	-0.195493	-1.35276	0.139136	0.0268106	FALSE	FALSE	FALSE	FALSE	FALSE	FALSE
HNRNPC	0	25.5704	25.3857	0	0	0	0	23.9456	0	0	0	0	P07910	HNRNPC	P07910	TRUE	9	-0.843879	34.8146	16.9854	0.301214	0.0595005	-8.82573	26.8328	9.00351	0.894437	0.281993	-25.8111	9.84739	-7.98185	0.767275	0.336768	-17.8292	17.8292	0	0.950601	1	-9.84739	25.8111	7.98185	0.669218	0.336768	FALSE	FALSE	FALSE	FALSE	FALSE	FALSE
HNRNPF	21.0679	20.5223	19.8196	19.6852	21.3366	19.6812	21.45	20.637	21.2188	22.0523	22.2364	22.9228	P52597	HNRNPF	P52597	FALSE	0	-1.26345	1.73468	0.235615	0.932276	0.729748	-2.13106	0.867067	-0.631995	0.906469	0.364242	-2.36667	0.631452	-0.867611	0.706504	0.222224	-3.6686	-0.67047	-2.16953	0.295632	0.00972464	-2.80098	0.19714	-1.30192	0.345996	0.0808974	FALSE	FALSE	FALSE	FALSE	FALSE	FALSE
HNRNPU	25.7749	25.8716	25.2909	25.0574	24.5891	25.6301	25.6433	25.389	26.1123	26.0474	26.2719	25.9469	Q00839	HNRNPU	Q00839	FALSE	0	-0.606853	1.71409	0.553617	0.829011	0.30774	-1.22951	1.09143	-0.069038	0.940139	0.895652	-1.78312	0.537815	-0.622655	0.727894	0.254988	-2.15701	0.163928	-0.996542	0.769547	0.0838072	-1.53436	0.786582	-0.373888	0.738006	0.483713	FALSE	FALSE	FALSE	FALSE	FALSE	FALSE
HNRNPUL1	0	17.9602	0	19.1881	17.6858	0	18.9284	18.6419	18.6036	19.9768	20.2958	19.8501	Q9BUJ2	HNRNPUL1	Q9BUJ2	TRUE	3	-19.4647	6.85564	-6.30455	0.827872	0.305837	-25.8981	0.422323	-12.7379	0.772042	0.0562634	-19.5935	6.72687	-6.43332	0.749952	0.296658	-20.9098	5.41057	-7.74962	0.870942	0.214931	-14.4765	11.8439	-1.3163	0.819059	0.825634	FALSE	FALSE	FALSE	FALSE	FALSE	FALSE
HNRNPUL2	0	18.9169	18.9279	18.4058	19.1729	18.3848	18.7072	18.5868	18.5758	0	19.8566	18.9969	Q1KMD3	HNRNPUL2	Q1KMD3	TRUE	2	-19.8926	7.81351	-6.03954	0.850561	0.348902	-19.8614	7.84472	-6.00833	0.904848	0.351273	-13.8218	13.8843	0.0312142	0.879721	0.996034	-8.14972	19.5564	5.70333	0.908197	0.375081	-8.18094	19.5252	5.67211	0.692217	0.377582	FALSE	FALSE	FALSE	FALSE	FALSE	FALSE
HP1BP3	0	16.4396	0	20.0266	0	0	20.9207	20.9418	22.384	20.7852	20.8915	0	Q5SSJ5	HP1BP3	Q5SSJ5	TRUE	5	-18.1692	15.7779	-1.19566	0.944196	0.876611	-32.9092	1.03793	-15.9356	0.783516	0.0625918	-31.7136	2.23358	-14.74	0.510749	0.0809217	-24.1903	9.75688	-7.21669	0.905925	0.360378	-9.45028	24.4969	7.5233	0.671988	0.341337	FALSE	FALSE	FALSE	FALSE	FALSE	FALSE
HSF1	0	0	0	0	0	0	17.7934	17.8097	18.0159	17.4616	0	17.1931	Q00613	HSF1	Q00613	TRUE	7	-8.87676	8.87676	0	0.951391	1	-26.7498	-8.99623	-17.873	0.168857	0.00141964	-26.7498	-8.99623	-17.873	0.0139777	0.00141964	-20.4283	-2.6748	-11.5516	0.429814	0.0164906	-2.55533	15.1982	6.32143	0.463227	0.141256	FALSE	FALSE	TRUE	FALSE	FALSE	TRUE
HSP90AA1	23.5743	23.6187	23.9197	22.9974	22.9644	23.4619	23.6146	23.2705	24.7231	24.6348	24.5189	24.1101	P07900	HSP90AA1	P07900	FALSE	0	-0.673352	1.79941	0.563028	0.840807	0.328964	-1.40154	1.07122	-0.165164	0.935113	0.768833	-1.96457	0.508188	-0.728192	0.701062	0.214859	-2.51646	-0.0437011	-1.28008	0.659902	0.0438933	-1.78827	0.68449	-0.55189	0.670035	0.338107	FALSE	FALSE	FALSE	FALSE	FALSE	FALSE
HSP90AB1	25.8128	25.5771	25.8385	24.9499	25.441	25.8465	25.3992	24.8435	24.0804	26.2752	26.5899	25.9201	P08238	HSP90AB1	P08238	FALSE	0	-0.908639	1.56928	0.330321	0.910265	0.56045	-0.270546	2.20737	0.968414	0.835431	0.110556	-0.600867	1.87705	0.638092	0.738121	0.273169	-2.08819	0.38973	-0.84923	0.842199	0.154973	-2.72628	-0.248363	-1.48732	0.121711	0.0238704	FALSE	FALSE	FALSE	FALSE	FALSE	FALSE
HSPA1B	20.4365	21.8146	20.602	20.1458	20.5463	20.3589	21.5408	18.6161	19.8785	22.6611	22.4056	20.6689	P0DMV9	HSPA1B	P0DMV9	FALSE	0	-1.39751	2.59892	0.600707	0.901262	0.512674	-1.05897	2.93746	0.939248	0.899736	0.314493	-1.65967	2.33676	0.338541	0.850373	0.70977	-3.55975	0.436686	-1.56153	0.805738	0.110624	-3.89829	0.0981455	-1.90007	0.287143	0.0598914	FALSE	FALSE	FALSE	FALSE	FALSE	FALSE
HSPA8	25.802	25.7295	25.9559	25.1486	25.4056	26.1224	25.6253	25.3281	25.5524	26.9021	26.9074	26.0338	P11142	HSPA8	P11142	FALSE	0	-0.894835	1.4354	0.270283	0.918272	0.61161	-0.837913	1.49232	0.327205	0.922579	0.540164	-1.1082	1.22204	0.0569221	0.872671	0.914214	-2.22068	0.109559	-1.05556	0.744043	0.0705868	-2.2776	0.0526367	-1.11248	0.284276	0.0590322	FALSE	FALSE	FALSE	FALSE	FALSE	FALSE
HSPH1	0	19.2227	19.7023	18.2946	0	18.4059	18.936	0	0	20.2342	19.6621	0	Q92598	HSPH1	Q92598	TRUE	5	-18.8205	20.3034	0.741488	0.947754	0.933382	-12.8989	26.225	6.66302	0.916308	0.459812	-13.6404	25.4835	5.92154	0.817118	0.509828	-20.6272	18.4967	-1.06523	0.947145	0.904436	-26.5487	12.5752	-6.98676	0.720738	0.43902	FALSE	FALSE	FALSE	FALSE	FALSE	FALSE
IFI16	23.9065	24.7257	0	24.5153	23.4738	23.1997	23.0466	22.132	21.7752	22.9612	0	24.2411	Q16666	IFI16	Q16666	TRUE	2	-24.8332	9.79556	-7.51884	0.85139	0.350709	-23.4216	11.2072	-6.10715	0.91494	0.444535	-15.9027	18.7261	1.41169	0.867241	0.857413	-9.31891	25.3099	7.99549	0.899335	0.322586	-10.7306	23.8982	6.5838	0.708553	0.411089	FALSE	FALSE	FALSE	FALSE	FALSE	FALSE
IGF2BP3	0	0	0	0	0	0	17.199	19.2126	19.6127	19.3019	0	0	O00425	IGF2BP3	O00425	TRUE	8	-9.94098	9.94098	0	0.951391	1	-28.6157	-8.73377	-18.6748	0.235424	0.00219936	-28.6157	-8.73377	-18.6748	0.0232904	0.00219936	-16.3749	3.50702	-6.43396	0.854432	0.176679	2.2998	22.1818	12.2408	0.106031	0.021308	FALSE	FALSE	TRUE	FALSE	FALSE	TRUE
IGF2R	18.2578	0	0	0	0	0	18.9943	18.8884	19.7065	18.6628	19.1598	20.4147	P11717	IGF2R	P11717	TRUE	5	-3.30251	15.4744	6.08594	0.694696	0.176066	-22.4989	-3.72201	-13.1105	0.543574	0.0116747	-28.5848	-9.80795	-19.1964	0.0121648	0.00128534	-28.8009	-10.024	-19.4124	0.0256838	0.00119513	-9.60447	9.17242	-0.216023	0.837977	0.959525	FALSE	FALSE	TRUE	TRUE	FALSE	TRUE
IK	0	0	0	0	0	0	14.6971	19.1235	20.0402	0	0	0	Q13123	IK	Q13123	TRUE	9	-2.69873	2.69873	0	0.951391	1	-20.6523	-15.2549	-17.9536	6.76337e-15	1.31859e-07	-20.6523	-15.2549	-17.9536	6.67838e-15	1.31859e-07	-2.69873	2.69873	0	0.950601	1	15.2549	20.6523	17.9536	7.24958e-15	1.31859e-07	FALSE	TRUE	TRUE	FALSE	TRUE	TRUE
INPP5F	0	0	0	0	0	0	20.3361	20.3252	20.3255	19.8475	19.4161	19.6277	Q9Y2H2	INPP5F	Q9Y2H2	TRUE	6	-0.984853	0.984853	0	0.951391	1	-21.3138	-19.3441	-20.3289	6.76337e-15	6.90454e-12	-21.3138	-19.3441	-20.3289	6.67838e-15	6.90454e-12	-20.6153	-18.6456	-19.6305	8.75964e-15	9.38948e-12	-0.286383	1.68332	0.69847	0.465209	0.142701	FALSE	TRUE	TRUE	TRUE	FALSE	TRUE
IPO9	0	0	0	0	0	0	0	0	17.7773	0	19.2936	20.7121	Q96P70	IPO9	Q96P70	TRUE	9	-13.6743	13.6743	0	0.951391	1	-19.6001	7.74857	-5.92577	0.904898	0.351663	-19.6001	7.74857	-5.92577	0.772953	0.351663	-27.0095	0.339126	-13.3352	0.701666	0.0547762	-21.0838	6.2649	-7.40944	0.604614	0.250671	FALSE	FALSE	FALSE	FALSE	FALSE	FALSE
ITGB1	0	0	0	0	0	0	20.0601	19.1019	18.5837	21.7342	20.7873	0	P05556	ITGB1	P05556	TRUE	7	-10.8964	10.8964	0	0.951391	1	-30.145	-8.35217	-19.2486	0.305493	0.00319647	-30.145	-8.35217	-19.2486	0.0385009	0.00319647	-25.0702	-3.27742	-14.1738	0.430328	0.0165235	-5.82164	15.9711	5.07475	0.657717	0.318702	FALSE	FALSE	TRUE	FALSE	FALSE	TRUE
IWS1	17.696	0	0	0	0	0	18.4118	18.2112	18.1079	17.9781	17.6754	0	Q96ST2	IWS1	Q96ST2	TRUE	6	-6.92878	18.7261	5.89867	0.838459	0.324505	-25.1724	0.482497	-12.3449	0.774272	0.0574163	-31.0711	-5.41617	-18.2436	0.133598	0.0106388	-24.7119	0.942941	-11.8845	0.73211	0.0654886	-6.46833	19.1866	6.35911	0.637662	0.29032	FALSE	FALSE	FALSE	FALSE	FALSE	FALSE
JMJD1C	19.2009	0	0	18.334	18.7041	18.5928	18.8957	19.9195	19.4342	18.3796	0	0	Q15652	JMJD1C	Q15652	TRUE	4	-25.7199	1.43324	-12.1433	0.371642	0.0736179	-26.5927	0.560405	-13.0162	0.775738	0.0581935	-14.4494	12.7037	-0.872836	0.870158	0.887299	-1.15945	25.9937	12.4171	0.739088	0.0683975	-0.286611	26.8665	13.29	0.266747	0.0540383	FALSE	FALSE	FALSE	FALSE	FALSE	FALSE
JPT1	0	0	0	0	0	0	18.157	19.3908	17.7345	19.895	19.1324	16.8854	Q9UK76	JPT1	Q9UK76	TRUE	6	-1.84767	1.84767	0	0.951391	1	-20.2751	-16.5798	-18.4274	6.76337e-15	4.02249e-09	-20.2751	-16.5798	-18.4274	6.67838e-15	4.02249e-09	-20.4853	-16.7899	-18.6376	8.75964e-15	3.64495e-09	-2.05781	1.63753	-0.210144	0.815271	0.802276	FALSE	TRUE	TRUE	TRUE	FALSE	TRUE
JPT2	0	17.4287	18.4043	19.5533	18.761	19.264	20.27	20.1552	0	18.306	18.0034	18.0073	Q9H910	JPT2	Q9H910	TRUE	2	-21.0473	6.55033	-7.24847	0.798993	0.264367	-15.3295	12.2681	-1.53074	0.93673	0.807033	-8.08107	19.5165	5.71773	0.780204	0.37214	-12.7116	14.886	1.0872	0.945448	0.862154	-18.4293	9.16827	-4.63053	0.731561	0.466267	FALSE	FALSE	FALSE	FALSE	FALSE	FALSE
KHSRP	20.8441	20.9982	20.5054	20.1802	20.7734	17.4771	20.9238	19	19.5369	22.4354	22.5309	20.3335	Q92945	KHSRP	Q92945	FALSE	0	-1.00746	3.61884	1.30569	0.770371	0.232909	-1.35079	3.27552	0.962367	0.907198	0.370297	-2.65648	1.96983	-0.343324	0.854727	0.744161	-4.60286	0.0234437	-2.28971	0.691907	0.0519004	-4.25954	0.366768	-1.94639	0.367318	0.0892154	FALSE	FALSE	FALSE	FALSE	FALSE	FALSE
KIF15	17.5948	0	0	0	0	0	17.561	0	17.8693	0	0	0	Q9NS87	KIF15	Q9NS87	TRUE	9	-6.88541	18.6153	5.86494	0.838387	0.324371	-18.6955	6.80519	-5.94516	0.900284	0.318166	-24.5604	0.940246	-11.8101	0.463108	0.0655444	-12.7503	12.7503	0	0.950601	1	-0.940246	24.5604	11.8101	0.305005	0.0655444	FALSE	FALSE	FALSE	FALSE	FALSE	FALSE
KIF20B	19.4275	0	0	0	19.1522	18.2922	21.0642	20.8678	21.1804	19.8468	20.7549	19.826	Q96Q89	KIF20B	Q96Q89	TRUE	3	-19.7911	7.77984	-6.00561	0.850718	0.349241	-28.3471	-0.776182	-14.5616	0.733099	0.0406271	-22.3415	5.22943	-8.55602	0.683471	0.193292	-21.4466	6.12433	-7.66112	0.879266	0.239634	-12.8905	14.6804	0.894902	0.828158	0.88621	FALSE	FALSE	FALSE	FALSE	FALSE	FALSE
KIF5B	0	0	0	18.865	0	0	19.5476	18.3066	0	19.32	0	0	P33176	KIF5B	P33176	TRUE	8	-23.1151	10.5385	-6.28834	0.877268	0.418873	-29.4449	4.20872	-12.6181	0.844058	0.123731	-23.1565	10.4971	-6.32973	0.793895	0.415933	-16.9785	16.6751	-0.15167	0.95006	0.984138	-10.6487	23.0049	6.17807	0.715541	0.426773	FALSE	FALSE	FALSE	FALSE	FALSE	FALSE
KMT2B	19.2831	0	0	0	0	0	0	19.2057	19.1633	0	0	0	Q9UMN6	KMT2B	Q9UMN6	TRUE	9	-7.45577	20.3112	6.42771	0.836788	0.321408	-20.2454	7.52153	-6.36196	0.90144	0.326107	-26.6731	1.09381	-12.7897	0.467327	0.0667641	-13.8835	13.8835	0	0.950601	1	-1.09381	26.6731	12.7897	0.308644	0.0667641	FALSE	FALSE	FALSE	FALSE	FALSE	FALSE
KNL1	0	0	0	0	0	17.8048	19.721	18.9522	19.226	19.0344	18.8659	0	Q8NG31	KNL1	Q8NG31	TRUE	6	-19.2143	7.34448	-5.93492	0.845148	0.337542	-32.5792	-6.02034	-19.2997	0.51148	0.00951451	-26.6442	-0.0854146	-13.3648	0.395115	0.0488296	-19.9779	6.5809	-6.69851	0.890829	0.28249	-6.61309	19.9457	6.66632	0.633333	0.284658	FALSE	FALSE	FALSE	FALSE	FALSE	FALSE
KRT18	19.2904	0	0	17.687	18.0058	0	0	18.1128	17.6607	17.71	18.8572	17.6334	P05783	KRT18	P05783	TRUE	4	-21.6955	10.7605	-5.46748	0.890216	0.464541	-21.7224	10.7336	-5.49437	0.916534	0.462416	-16.2549	16.2011	-0.0268898	0.879806	0.997084	-22.3972	10.0587	-6.16925	0.913218	0.411194	-22.3703	10.0856	-6.14236	0.709496	0.413157	FALSE	FALSE	FALSE	FALSE	FALSE	FALSE
KYNU	0	22.7773	0	23.1952	0	20.5075	19.2454	20.2669	0	20.9311	0	23.0481	Q16719	KYNU	Q16719	TRUE	5	-29.0715	15.1213	-6.97513	0.896875	0.492355	-27.6747	16.5181	-5.57829	0.925297	0.58107	-20.6995	23.4932	1.39684	0.870336	0.889168	-22.1885	22.0042	-0.0921555	0.950352	0.99266	-23.5854	20.6074	-1.489	0.827545	0.881917	FALSE	FALSE	FALSE	FALSE	FALSE	FALSE
LARP1	19.1708	19.1525	19.2484	18.305	20.2484	18.7783	20.04	19.5863	18.3417	19.6807	18.7746	20.3965	Q6PKG0	LARP1	Q6PKG0	FALSE	0	-1.6081	1.76809	0.0799951	0.946761	0.916779	-1.82018	1.556	-0.132092	0.938936	0.863087	-1.90018	1.476	-0.212087	0.859214	0.782168	-2.19477	1.18141	-0.50668	0.924277	0.51332	-1.98268	1.3935	-0.294593	0.796767	0.701532	FALSE	FALSE	FALSE	FALSE	FALSE	FALSE
LASP1	20.0303	16.083	19.2862	0	19.6929	20.1322	20.2975	20.1679	20.1052	20.9097	20.6447	19.2455	Q14847	LASP1	Q14847	TRUE	1	-5.19209	15.575	5.19147	0.815433	0.286488	-12.1073	8.65987	-1.72369	0.932667	0.715325	-17.2987	3.4684	-6.91516	0.656475	0.165713	-17.3752	3.39197	-6.99159	0.846203	0.161577	-10.46	10.3071	-0.076431	0.841373	0.987046	FALSE	FALSE	FALSE	FALSE	FALSE	FALSE
LBR	19.8184	22.6554	0	20.8113	20.8114	21.1067	20.1485	0	0	20.634	20.7602	0	Q14739	LBR	Q14739	TRUE	4	-25.0754	11.5717	-6.75186	0.879226	0.425169	-10.8818	25.7653	7.44176	0.908478	0.381286	-4.1299	32.5171	14.1936	0.583038	0.113353	-11.2118	25.4353	7.11175	0.911989	0.401857	-25.4054	11.2417	-7.08188	0.705149	0.403757	FALSE	FALSE	FALSE	FALSE	FALSE	FALSE
LIMA1	23.2617	23.7418	23.3239	23.7021	23.4947	23.3931	24.185	24.1185	24.0723	23.8738	24.1339	24.0416	Q9UHB6	LIMA1	Q9UHB6	FALSE	0	-1.09848	0.92344	-0.087522	0.942265	0.84872	-1.69374	0.328183	-0.68278	0.862201	0.160445	-1.60622	0.415705	-0.595258	0.701152	0.214978	-1.49741	0.524517	-0.486445	0.895584	0.30384	-0.90215	1.11977	0.108812	0.816974	0.812647	FALSE	FALSE	FALSE	FALSE	FALSE	FALSE
LIMCH1	20.8795	19.5711	20.8585	20.9492	20.4175	20.8381	17.2574	17.2657	0	0	0	0	Q9UPQ0	LIMCH1	Q9UPQ0	TRUE	4	-9.16865	8.57154	-0.298556	0.948187	0.940827	0.0585909	17.7988	8.92869	0.75576	0.0487984	0.357147	18.0973	9.22724	0.366343	0.0431043	11.8648	29.605	20.7349	0.00743188	0.00052418	2.63758	20.3778	11.5077	0.0810149	0.0167314	FALSE	FALSE	FALSE	TRUE	FALSE	TRUE
LMO7	19.4576	21.9668	0	0	19.6072	0	19.4328	19.949	17.5985	0	0	0	Q8WWI1	LMO7	Q8WWI1	TRUE	6	-7.36423	21.909	7.2724	0.817345	0.289301	-19.8219	9.45133	-5.1853	0.914762	0.442607	-27.0943	2.17893	-12.4577	0.524586	0.0861466	-8.10088	21.1724	6.53574	0.902156	0.337945	4.35681	33.6301	18.9934	0.0809717	0.0167126	FALSE	FALSE	FALSE	FALSE	FALSE	FALSE
LPP	18.4273	0	0	0	18.1984	18.7122	0	0	0	0	0	0	Q93052	LPP	Q93052	TRUE	9	-19.4772	7.15501	-6.1611	0.836947	0.321699	-7.17369	19.4585	6.14242	0.901005	0.323086	-1.01258	25.6196	12.3035	0.465033	0.0660979	-1.01258	25.6196	12.3035	0.733611	0.0660979	-13.3161	13.3161	0	0.842923	1	FALSE	FALSE	FALSE	FALSE	FALSE	FALSE
LRBA	20.6056	20.062	20.6271	20.5056	20.5968	20.7227	20.4627	20.8802	20.8126	19.9916	20.3241	19.986	P50851	LRBA	P50851	FALSE	0	-1.22132	0.867634	-0.176844	0.93027	0.709946	-1.33147	0.757491	-0.286987	0.923174	0.548767	-1.15462	0.934335	-0.110143	0.862992	0.816359	-0.536696	1.55226	0.507782	0.894589	0.299158	-0.426553	1.6624	0.617926	0.566007	0.212986	FALSE	FALSE	FALSE	FALSE	FALSE	FALSE
LRRFIP1	21.1662	20.9813	21.8069	20.954	21.2378	22.2866	20.8832	21.3179	21.3644	20.2908	20.6753	20.5809	Q32MZ4	LRRFIP1	Q32MZ4	FALSE	0	-1.41928	1.06989	-0.174694	0.934903	0.757526	-1.11496	1.3742	0.129618	0.9372	0.818589	-0.940269	1.54889	0.304312	0.832918	0.592819	-0.26746	2.2217	0.977121	0.804179	0.1092	-0.571772	1.91739	0.672809	0.605553	0.251692	FALSE	FALSE	FALSE	FALSE	FALSE	FALSE
LSM12	17.3118	0	0	0	17.206	0	17.1355	17.4958	0	0	16.5266	0	Q3MHD2	LSM12	Q3MHD2	TRUE	7	-17.3989	17.4694	0.0352594	0.95121	0.996441	-23.2073	11.6609	-5.77316	0.917354	0.471998	-23.2425	11.6257	-5.80842	0.807961	0.469378	-17.2077	17.6606	0.226451	0.949817	0.977144	-11.3992	23.469	6.03487	0.726325	0.452778	FALSE	FALSE	FALSE	FALSE	FALSE	FALSE
LSM14A	0	16.0049	0	0	16.9271	0	17.394	16.6219	0	0	0	0	Q8ND56	LSM14A	Q8ND56	TRUE	8	-15.0294	14.4145	-0.30743	0.94945	0.963264	-20.7256	8.71826	-6.00369	0.908264	0.379414	-20.4182	9.02569	-5.69626	0.790158	0.403253	-9.07957	20.3643	5.64238	0.912742	0.407538	-3.38331	26.0606	11.3386	0.42196	0.115149	FALSE	FALSE	FALSE	FALSE	FALSE	FALSE
LUZP1	0	17.654	18.4812	18.5787	18.2928	18.5668	18.1051	20.5249	0	18.4724	17.8795	18.0337	Q86V48	LUZP1	Q86V48	TRUE	2	-19.9861	7.11731	-6.43437	0.830287	0.309902	-14.3833	12.7201	-0.831584	0.940021	0.892391	-7.9489	19.1545	5.60279	0.78055	0.373161	-13.2008	13.9026	0.350891	0.949014	0.95446	-18.8036	8.29979	-5.2519	0.704569	0.402527	FALSE	FALSE	FALSE	FALSE	FALSE	FALSE
MACF1	19.0529	0	0	0	0	0	20.2672	20.8659	20.7007	19.5367	19.0839	19.6432	Q9UPN3	MACF1	Q9UPN3	TRUE	5	-3.4055	16.1074	6.35096	0.691899	0.174447	-24.0168	-4.50382	-14.2603	0.506616	0.00923725	-30.3677	-10.8548	-20.6112	0.00871178	0.00103817	-29.1777	-9.66482	-19.4213	0.0327209	0.00152746	-8.56649	10.9464	1.18997	0.812932	0.78835	FALSE	FALSE	TRUE	TRUE	FALSE	TRUE
MAGED1	18.8974	18.5758	0	19.0333	0	19.1894	18.0031	18.1624	18.2099	0	0	17.6656	Q9Y5V3	MAGED1	Q9Y5V3	TRUE	4	-16.6076	16.1079	-0.249844	0.949986	0.973125	-21.9919	10.7237	-5.63407	0.91588	0.454961	-21.742	10.9736	-5.38423	0.809203	0.474582	-9.50538	23.2102	6.8524	0.906991	0.367162	-4.12116	28.5944	12.2366	0.438086	0.124528	FALSE	FALSE	FALSE	FALSE	FALSE	FALSE
MAGED2	0	0	0	0	0	0	18.0028	0	16.6984	0	0	0	Q9UNF1	MAGED2	Q9UNF1	TRUE	10	-8.90564	8.90564	0	0.951391	1	-20.4727	-2.6614	-11.567	0.593062	0.0166408	-20.4727	-2.6614	-11.567	0.171721	0.0166408	-8.90564	8.90564	0	0.950601	1	2.6614	20.4727	11.567	0.0808061	0.0166408	FALSE	FALSE	FALSE	FALSE	FALSE	FALSE
MAP1A	18.773	0	0	0	17.9165	19.6815	20.66	20.9939	20.5771	19.5284	17.9844	19.0708	P78559	MAP1A	P78559	TRUE	3	-19.8785	7.32843	-6.27503	0.837695	0.323082	-28.0895	-0.882589	-14.486	0.728985	0.0393614	-21.8145	5.39244	-8.21102	0.693072	0.20466	-19.932	7.27494	-6.32852	0.898685	0.319205	-11.721	15.486	1.8825	0.808115	0.760823	FALSE	FALSE	FALSE	FALSE	FALSE	FALSE
MAP1B	18.011	0	0	0	18.0363	0	20.2058	20.4474	20.6089	19.1713	18.0821	15.5148	P46821	MAP1B	P46821	TRUE	4	-13.1288	13.1119	-0.00844354	0.951334	0.998867	-27.5374	-1.29665	-14.417	0.712095	0.0347249	-27.529	-1.2882	-14.4086	0.317879	0.0348075	-24.6977	1.54307	-11.5773	0.75711	0.0769152	-10.2891	15.9516	2.83127	0.782452	0.636337	FALSE	FALSE	FALSE	FALSE	FALSE	FALSE
MAP4	21.5667	21.2454	20.8782	21.1279	21.3625	21.1652	21.3733	21.1468	21.0824	21.5438	21.6891	20.9472	P27816	MAP4	P27816	FALSE	0	-1.0732	1.09635	0.0115758	0.950418	0.981222	-1.05549	1.11406	0.0292837	0.942118	0.952524	-1.06707	1.10248	0.0177078	0.877674	0.971278	-1.2596	0.909946	-0.174829	0.93889	0.723213	-1.27731	0.892239	-0.192536	0.795784	0.696734	FALSE	FALSE	FALSE	FALSE	FALSE	FALSE
MAP4K4	0	0	0	0	18.8152	0	16.4725	18.2543	0	0	0	0	O95819	MAP4K4	O95819	TRUE	9	-19.3672	6.82372	-6.27172	0.827951	0.305969	-24.671	1.51984	-11.5756	0.803518	0.0764831	-18.3993	7.79156	-5.30388	0.783663	0.382536	-6.82372	19.3672	6.27172	0.896029	0.305969	-1.51984	24.671	11.5756	0.335207	0.0764831	FALSE	FALSE	FALSE	FALSE	FALSE	FALSE
MAPRE2	20.4479	0	0	20.0502	19.9961	0	20.4279	20.6098	20.7182	19.9658	0	0	Q15555	MAPRE2	Q15555	TRUE	5	-24.3271	11.2615	-6.53278	0.879726	0.426808	-31.5636	4.02498	-13.7693	0.837611	0.113679	-25.0308	10.5578	-7.23653	0.783054	0.380675	-11.1008	24.4878	6.69347	0.913827	0.415947	-3.86429	31.7243	13.93	0.412539	0.110084	FALSE	FALSE	FALSE	FALSE	FALSE	FALSE
MAVS	0	0	19.1439	18.2421	15.4139	0	0	18.0438	0	16.5188	0	0	Q7Z434	MAVS	Q7Z434	TRUE	7	-22.8947	13.22	-4.83737	0.909948	0.55861	-17.6906	18.424	0.366684	0.94251	0.964276	-12.8533	23.2614	5.20405	0.82126	0.529836	-12.3449	23.7697	5.71239	0.922217	0.49145	-17.549	18.5657	0.508335	0.83683	0.950493	FALSE	FALSE	FALSE	FALSE	FALSE	FALSE
MFAP1	20.7799	20.3889	20.7806	20.6498	20.772	20.6958	19.7072	20.0964	20.0069	19.2267	19.4667	19.1821	P55081	MFAP1	P55081	FALSE	0	-1.06943	0.957318	-0.0560576	0.945903	0.902928	-0.30037	1.72638	0.713005	0.855659	0.14552	-0.244313	1.78244	0.769063	0.594384	0.119844	0.400681	2.42743	1.41406	0.341961	0.0117192	-0.368382	1.65837	0.644994	0.528794	0.183238	FALSE	FALSE	FALSE	FALSE	FALSE	FALSE
MIA	19.6034	0	0	19.771	19.2274	19.7934	19.8162	0	20.3647	0	0	19.6179	Q16674	MIA	Q16674	TRUE	5	-30.5304	4.40485	-13.0628	0.578028	0.12463	-24.3268	10.6085	-6.85914	0.910174	0.39658	-11.264	23.6713	6.20366	0.800941	0.44151	-4.40966	30.5256	13.058	0.819617	0.124751	-10.6133	24.322	6.85432	0.701882	0.396898	FALSE	FALSE	FALSE	FALSE	FALSE	FALSE
MKI67	0	0	0	0	0	0	15.7771	0	0	15.3856	18.743	0	P46013	MKI67	P46013	TRUE	9	-11.9645	11.9645	0	0.951391	1	-17.2236	6.70548	-5.25904	0.904053	0.345157	-17.2236	6.70548	-5.25904	0.770518	0.345157	-23.3407	0.588317	-11.3762	0.717275	0.0599036	-18.0817	5.84736	-6.11716	0.62683	0.276437	FALSE	FALSE	FALSE	FALSE	FALSE	FALSE
MLH1	0	0	0	0	0	0	17.5196	17.0279	0	0	0	20.2113	P40692	MLH1	P40692	TRUE	9	-13.5735	13.5735	0	0.951391	1	-25.0893	2.05771	-11.5158	0.815357	0.0870006	-25.0893	2.05771	-11.5158	0.526752	0.0870006	-20.3106	6.83643	-6.73709	0.892515	0.289775	-8.7948	18.3522	4.77872	0.723343	0.445357	FALSE	FALSE	FALSE	FALSE	FALSE	FALSE
MPRIP	20.1892	0	0	0	0	0	20.8637	19.5961	18.6672	0	0	0	Q6WCQ1	MPRIP	Q6WCQ1	TRUE	8	-3.64097	17.1004	6.72973	0.693997	0.175659	-23.35	-2.60855	-12.9793	0.624136	0.0197866	-30.0797	-9.33829	-19.709	0.0212852	0.00204667	-10.3707	10.3707	0	0.950601	1	9.33829	30.0797	19.709	0.00432669	0.00204667	FALSE	FALSE	TRUE	FALSE	TRUE	TRUE
MSN	23.4474	23.5846	0	23.3727	23.8338	23.0633	23.3379	0	22.7198	24.2317	24.4502	24.5648	P26038	MSN	P26038	TRUE	2	-24.539	9.04711	-7.74595	0.837707	0.323105	-16.4683	17.1178	0.324752	0.942567	0.965978	-8.72236	24.8638	8.0707	0.753547	0.304382	-17.7854	15.8008	-0.992285	0.94683	0.896353	-25.8561	7.73008	-9.06299	0.606225	0.252428	FALSE	FALSE	FALSE	FALSE	FALSE	FALSE
MTA1	0	18.9925	19.3446	19.4041	19.3258	19.4763	0	18.2179	18.3654	0	0	0	Q13330	MTA1	Q13330	TRUE	5	-20.1495	6.9035	-6.62302	0.821707	0.29593	-12.9419	14.1111	0.584583	0.941146	0.924076	-6.31891	20.7341	7.2076	0.729686	0.258044	5.87554	32.9286	19.4021	0.306924	0.0101847	-1.33207	25.721	12.1944	0.32276	0.0717406	FALSE	FALSE	FALSE	FALSE	FALSE	FALSE
MTDH	19.8828	0	0	17.3104	16.8345	16.8844	18.4753	19.2842	19.1826	20.8235	18.9543	17.8839	Q86UE4	MTDH	Q86UE4	TRUE	2	-20.6461	-0.118196	-10.3821	0.235689	0.0479237	-22.617	-2.08914	-12.3531	0.653869	0.0236013	-12.2349	8.29301	-1.97095	0.845438	0.673514	-12.4748	8.05312	-2.21083	0.933784	0.636945	-10.5038	10.0241	-0.239885	0.837897	0.958889	FALSE	FALSE	FALSE	FALSE	FALSE	FALSE
MTUS1	0	18.4014	19.0117	18.9967	18.9662	0	18.7751	19.0169	0	18.2254	18.0957	0	Q9ULD2	MTUS1	Q9ULD2	TRUE	4	-19.2417	18.8751	-0.183276	0.950516	0.983077	-19.1847	18.932	-0.126328	0.943295	0.988335	-19.0014	19.1153	0.0569479	0.879616	0.994741	-18.5111	19.6057	0.547286	0.948835	0.949501	-18.568	19.5487	0.490339	0.837372	0.954749	FALSE	FALSE	FALSE	FALSE	FALSE	FALSE
MVP	21.4621	21.7161	0	18.655	20.5128	21.2591	20.7786	20.1209	19.6748	20.8597	21.7358	20.6845	Q14764	MVP	Q14764	TRUE	1	-16.8701	5.37096	-5.74959	0.804535	0.271436	-16.9192	5.32189	-5.79865	0.891804	0.267647	-11.1696	11.0715	-0.0490654	0.879411	0.992235	-12.0715	10.1696	-0.950974	0.94496	0.850543	-12.0225	10.2186	-0.901908	0.824066	0.858156	FALSE	FALSE	FALSE	FALSE	FALSE	FALSE
MYH13	19.5841	18.3582	0	0	0	19.2682	22.4384	0	0	0	0	0	Q9UKX3	MYH13	Q9UKX3	TRUE	8	-11.7005	24.1499	6.22468	0.886766	0.451383	-12.7572	23.0931	5.16794	0.921837	0.529682	-18.9819	16.8685	-1.05674	0.871038	0.896591	-11.5024	24.3479	6.42274	0.916466	0.437602	-10.4457	25.4047	7.47948	0.687668	0.368961	FALSE	FALSE	FALSE	FALSE	FALSE	FALSE
MYH9	25.9292	26.946	26.6977	26.3196	25.5636	25.4404	25.5414	24.81	25.4929	26.0997	26.1595	27.3296	P35579	MYH9	P35579	FALSE	0	-0.603991	2.10352	0.749762	0.778536	0.241119	-0.110919	2.59659	1.24283	0.79134	0.0675369	-0.860681	1.84683	0.493072	0.79794	0.430339	-2.10882	0.598686	-0.755068	0.878779	0.238063	-2.60189	0.105613	-1.24814	0.308089	0.0665764	FALSE	FALSE	FALSE	FALSE	FALSE	FALSE
MYL12B	0	0	0	0	0	0	18.8237	18.4677	0	0	0	0	O14950	MYL12B	O14950	TRUE	10	-9.54416	9.54416	0	0.951391	1	-21.9747	-2.88633	-12.4305	0.590942	0.016425	-21.9747	-2.88633	-12.4305	0.170692	0.016425	-9.54416	9.54416	0	0.950601	1	2.88633	21.9747	12.4305	0.0803009	0.016425	FALSE	FALSE	FALSE	FALSE	FALSE	FALSE
MYO1B	19.839	21.7179	0	21.1241	18.6191	17.5488	19.2557	19.0861	0	0	21.1888	22.4663	O43795	MYO1B	O43795	TRUE	3	-23.5561	13.066	-5.24505	0.905164	0.532286	-17.2393	19.3827	1.07169	0.940199	0.897332	-11.9943	24.6277	6.31674	0.804236	0.454274	-13.7653	22.8567	4.54566	0.930337	0.587275	-20.0821	16.5399	-1.77108	0.81995	0.831282	FALSE	FALSE	FALSE	FALSE	FALSE	FALSE
NAA10	20.3571	21.8868	21.8622	20.9903	20.6923	20.5273	0	18.7998	0	19.6872	19.0363	0	P41227	NAA10	P41227	TRUE	3	-13.1691	14.4332	0.632063	0.94693	0.91956	1.30094	28.9033	15.1021	0.714422	0.035315	0.668874	28.2712	14.47	0.359403	0.0418196	-5.97237	21.63	7.8288	0.876453	0.23079	-20.4424	7.15992	-6.64124	0.647518	0.303805	FALSE	FALSE	FALSE	FALSE	FALSE	FALSE
NACC1	0	0	0	18.9745	18.6512	0	0	0	0	0	0	0	Q96RE7	NACC1	Q96RE7	TRUE	10	-22.1705	-2.91332	-12.5419	0.0438725	0.0164159	-9.62857	9.62857	0	0.943668	1	2.91332	22.1705	12.5419	0.170648	0.0164159	2.91332	22.1705	12.5419	0.428641	0.0164159	-9.62857	9.62857	0	0.842923	1	TRUE	FALSE	FALSE	FALSE	FALSE	TRUE
NAP1L4	19.6822	19.3324	19.6235	19.6922	20.0205	19.7795	17.8312	19.0304	21.6727	20.2242	20.2164	19.4762	Q99733	NAP1L4	Q99733	FALSE	0	-2.31726	1.74794	-0.28466	0.934951	0.758053	-1.99801	2.0672	0.0345995	0.942701	0.97005	-1.71335	2.35186	0.319259	0.85296	0.729922	-2.17419	1.89102	-0.14158	0.946097	0.877978	-2.49344	1.57176	-0.46084	0.778404	0.619583	FALSE	FALSE	FALSE	FALSE	FALSE	FALSE
NASP	0	0	0	0	0	0	19.0727	17.4135	0	0	0	0	P49321	NASP	P49321	TRUE	10	-9.36755	9.36755	0	0.951391	1	-21.5296	-2.79452	-12.1621	0.593416	0.0166727	-21.5296	-2.79452	-12.1621	0.171872	0.0166727	-9.36755	9.36755	0	0.950601	1	2.79452	21.5296	12.1621	0.08088	0.0166727	FALSE	FALSE	FALSE	FALSE	FALSE	FALSE
NBR1	0	0	0	0	17.3788	0	0	18.2403	18.3602	17.8753	17.8078	0	Q14596	NBR1	Q14596	TRUE	7	-21.5596	9.97369	-5.79293	0.879619	0.426456	-27.9668	3.56646	-12.2002	0.837613	0.113682	-22.1739	9.35939	-6.40723	0.783164	0.381008	-21.868	9.6652	-6.10142	0.912166	0.403182	-15.4608	16.0724	0.305812	0.838774	0.965876	FALSE	FALSE	FALSE	FALSE	FALSE	FALSE
NCAPG	17.5879	21.0437	19.9914	18.5702	0	0	16.8469	0	19.1733	18.44	0	21.9327	Q9BPX3	NCAPG	Q9BPX3	TRUE	4	-3.55871	30.2606	13.351	0.521747	0.107482	-9.37536	24.444	7.5343	0.903223	0.338942	-22.7263	11.093	-5.81665	0.80455	0.455523	-24.1772	9.64216	-7.2675	0.905129	0.355444	-18.3605	15.4588	-1.45085	0.822846	0.850052	FALSE	FALSE	FALSE	FALSE	FALSE	FALSE
NCAPH	0	18.1413	0	18.6482	0	18.8618	0	18.6533	18.0509	18.8634	18.2498	17.2563	Q15003	NCAPH	Q15003	TRUE	4	-22.7459	9.83349	-6.45622	0.868313	0.392377	-22.4773	10.1021	-6.18759	0.911748	0.411566	-16.0211	16.5583	0.268629	0.877649	0.970985	-21.9095	10.6699	-5.61984	0.918358	0.454244	-22.1782	10.4012	-5.88847	0.718504	0.433694	FALSE	FALSE	FALSE	FALSE	FALSE	FALSE
NCK2	20.6988	0	20.8609	0	20.8005	21.0135	20.1731	20.1242	20.3488	0	19.0268	19.0508	O43639	NCK2	O43639	TRUE	3	-17.9788	17.8093	-0.0847539	0.950964	0.991664	-24.2562	11.532	-6.36211	0.914616	0.441024	-24.1714	11.6167	-6.27735	0.802356	0.446927	-16.6486	19.1396	1.24551	0.9461	0.878065	-10.3712	25.4169	7.52286	0.685811	0.365526	FALSE	FALSE	FALSE	FALSE	FALSE	FALSE
NCL	24.7896	25.1359	25.1493	24.6066	24.7947	24.5521	24.4424	23.9342	23.718	25.3542	25.4511	24.934	P19338	NCL	P19338	FALSE	0	-0.696255	1.44383	0.37379	0.886061	0.448788	-0.0766529	2.06344	0.993392	0.787502	0.0650411	-0.450443	1.68965	0.619602	0.706359	0.222023	-1.66533	0.474758	-0.595287	0.879127	0.239182	-2.28493	-0.144844	-1.21489	0.159155	0.0303437	FALSE	FALSE	FALSE	FALSE	FALSE	FALSE
NCOR2	18.5676	0	0	0	17.9501	20.7052	18.0844	0	17.9788	0	0	0	Q9Y618	NCOR2	Q9Y618	TRUE	7	-23.2165	9.82467	-6.69589	0.864535	0.382212	-22.3525	10.6887	-5.83189	0.914907	0.444177	-15.6566	17.3846	0.864007	0.872118	0.908198	-3.63548	29.4056	12.8851	0.806385	0.111224	-4.49949	28.5416	12.0211	0.452541	0.133799	FALSE	FALSE	FALSE	FALSE	FALSE	FALSE
NEDD4L	0	0	0	0	0	0	18.1753	18.2592	0	0	0	0	Q96PU5	NEDD4L	Q96PU5	TRUE	10	-9.32592	9.32592	0	0.951391	1	-21.4708	-2.81891	-12.1448	0.591012	0.0164341	-21.4708	-2.81891	-12.1448	0.170736	0.0164341	-9.32592	9.32592	0	0.950601	1	2.81891	21.4708	12.1448	0.0803224	0.0164341	FALSE	FALSE	FALSE	FALSE	FALSE	FALSE
NEDD8	0	0	0	0	25.0666	0	24.3816	0	24.7453	24.2448	0	0	Q15843	NEDD8	Q15843	TRUE	8	-30.0966	13.3855	-8.35554	0.873168	0.406295	-38.1167	5.36539	-16.3756	0.843179	0.122283	-29.7611	13.7209	-8.0201	0.796373	0.42467	-21.4671	22.015	0.273934	0.949841	0.977828	-13.447	30.0351	8.29403	0.707879	0.409622	FALSE	FALSE	FALSE	FALSE	FALSE	FALSE
NELFE	19.4538	0	0	0	19.27	0	0	18.6484	19.2143	0	0	18.3112	P18615	NELFE	P18615	TRUE	7	-19.3094	19.4319	0.0612683	0.951107	0.994433	-25.507	13.2343	-6.13633	0.918901	0.490867	-25.5682	13.173	-6.1976	0.812013	0.486669	-19.051	19.6902	0.319592	0.949601	0.970971	-12.8534	25.8878	6.51719	0.731134	0.465145	FALSE	FALSE	FALSE	FALSE	FALSE	FALSE
NHLRC2	19.1446	19.0646	0	19.2264	19.0019	0	19.4887	19.9085	0	19.9297	18.7722	19.208	Q8NBF2	NHLRC2	Q8NBF2	TRUE	3	-17.0705	17.0578	-0.00637032	0.951358	0.999343	-17.4601	16.6681	-0.396004	0.942341	0.959179	-17.4538	16.6745	-0.389634	0.876703	0.959835	-23.6247	10.5036	-6.56052	0.912557	0.40613	-23.235	10.8933	-6.17088	0.718429	0.433516	FALSE	FALSE	FALSE	FALSE	FALSE	FALSE
NKAPD1	0	0	0	0	18.1296	0	18.0421	18.7042	18.4136	0	0	0	Q6ZUT1	NKAPD1	Q6ZUT1	TRUE	8	-15.3293	3.24287	-6.0432	0.692073	0.174547	-27.6727	-9.10055	-18.3866	0.1847	0.00158035	-21.6295	-3.05735	-12.3434	0.162794	0.0148952	-3.24287	15.3293	6.0432	0.853341	0.174547	9.10055	27.6727	18.3866	0.00253839	0.00158035	FALSE	FALSE	FALSE	FALSE	TRUE	TRUE
NME2	20.8524	24.3044	0	23.4468	23.8205	24.0891	21.8732	23.2845	23.6078	24.7676	22.9041	21.3853	P22392	NME2	P22392	TRUE	1	-20.4971	3.03061	-8.73323	0.585104	0.127047	-19.6334	3.89427	-7.86957	0.863635	0.164021	-10.9002	12.6275	0.863653	0.868629	0.871455	-10.9974	12.5303	0.766483	0.946411	0.885793	-11.861	11.6667	-0.0971701	0.841182	0.985464	FALSE	FALSE	FALSE	FALSE	FALSE	FALSE
NMT1	22.6347	0	0	0	0	0	0	21.3566	21.0281	21.4472	21.5142	0	P30419	NMT1	P30419	TRUE	7	-11.6863	26.7761	7.5449	0.869959	0.396984	-25.8145	12.6478	-6.58335	0.916116	0.457627	-33.3594	5.10291	-14.1283	0.611442	0.130547	-33.5516	4.91069	-14.3205	0.820752	0.126035	-19.4234	19.0389	-0.192227	0.840811	0.98241	FALSE	FALSE	FALSE	FALSE	FALSE	FALSE
NOL11	18.6555	22.6342	21.6008	21.3048	19.9481	20.6462	20.2622	18.3789	20.4695	19.7842	20.5116	22.7634	Q9H8H0	NOL11	Q9H8H0	FALSE	0	-2.41089	3.07177	0.33044	0.937793	0.790759	-1.48141	4.00124	1.25992	0.901245	0.32475	-1.81185	3.6708	0.929476	0.806113	0.461793	-3.12803	2.35462	-0.386707	0.940614	0.756359	-4.05751	1.42514	-1.31618	0.648241	0.304828	FALSE	FALSE	FALSE	FALSE	FALSE	FALSE
NOLC1	19.4872	19.7628	0	0	19.6846	0	0	0	0	0	0	0	Q14978	NOLC1	Q14978	TRUE	9	-7.66461	20.7082	6.52177	0.838526	0.324631	-1.10306	27.2697	13.0833	0.789792	0.0665132	-7.62484	20.7479	6.56155	0.761206	0.321853	-7.62484	20.7479	6.56155	0.899195	0.321853	-14.1864	14.1864	0	0.842923	1	FALSE	FALSE	FALSE	FALSE	FALSE	FALSE
NONO	24.3804	24.4195	24.8389	23.873	24.7952	25.6044	24.082	24.5764	25.4385	24.4432	24.3703	24.4911	Q15233	NONO	Q15233	FALSE	0	-1.60304	1.18055	-0.211244	0.933138	0.738623	-1.54447	1.23912	-0.152676	0.936816	0.809132	-1.33323	1.45036	0.0585672	0.873745	0.926067	-1.06912	1.71447	0.322675	0.932094	0.611819	-1.12769	1.6559	0.264108	0.791653	0.677109	FALSE	FALSE	FALSE	FALSE	FALSE	FALSE
NOP58	20.9092	22.6616	22.3564	22.2464	21.3954	21.4705	19.6372	19.771	19.9298	0	0	0	Q9Y2X3	NOP58	Q9Y2X3	TRUE	3	-1.07175	1.61499	0.271621	0.92434	0.657485	0.853002	3.53974	2.19637	0.395297	0.00501475	0.581381	3.26812	1.92475	0.130179	0.0102432	20.3607	23.0475	21.7041	8.75964e-15	5.93981e-11	18.436	21.1227	19.7793	7.24958e-15	1.34092e-10	FALSE	FALSE	FALSE	TRUE	TRUE	TRUE
NPM1	25.2556	25.1299	25.2733	24.601	25.2276	25.1742	25.1727	24.8145	25.2202	26.3837	26.3374	25.6794	P06748	NPM1	P06748	FALSE	0	-0.872821	1.3101	0.218639	0.924699	0.660429	-0.941003	1.24191	0.150456	0.9348	0.761716	-1.15964	1.02328	-0.0681828	0.87046	0.890467	-2.224	-0.0410831	-1.13254	0.658218	0.0435234	-2.15582	0.0270997	-1.06436	0.269454	0.054782	FALSE	FALSE	FALSE	FALSE	FALSE	FALSE
NRBP1	0	0	0	0	0	0	17.311	17.3039	0	0	0	0	Q9UHY1	NRBP1	Q9UHY1	TRUE	10	-8.86523	8.86523	0	0.951391	1	-20.4035	-2.67307	-11.5383	0.591358	0.0164788	-20.4035	-2.67307	-11.5383	0.17095	0.0164788	-8.86523	8.86523	0	0.950601	1	2.67307	20.4035	11.5383	0.0804279	0.0164788	FALSE	FALSE	FALSE	FALSE	FALSE	FALSE
NSFL1C	17.8265	0	17.4428	17.3317	0	0	0	17.3886	17.3031	0	0	0	Q9UNZ2	NSFL1C	Q9UNZ2	TRUE	7	-9.43072	21.3891	5.9792	0.871702	0.401986	-15.2174	15.6024	0.192519	0.942961	0.978016	-21.1966	9.62323	-5.78668	0.794119	0.416712	-9.6327	21.1871	5.77722	0.914017	0.417445	-3.84602	26.9738	11.5639	0.43639	0.123496	FALSE	FALSE	FALSE	FALSE	FALSE	FALSE
NUCKS1	19.7993	20.0273	21.0081	20.3616	21.027	21.1291	19.7283	20.5127	20.6086	21.3193	20.809	20.7953	Q9H1E3	NUCKS1	Q9H1E3	FALSE	0	-1.84181	0.71981	-0.560999	0.849575	0.346774	-1.2858	1.27582	-0.00499165	0.94345	0.993141	-0.724802	1.83682	0.556007	0.772658	0.350865	-1.41611	1.14551	-0.135304	0.943454	0.816042	-1.97212	0.589498	-0.691311	0.606181	0.25238	FALSE	FALSE	FALSE	FALSE	FALSE	FALSE
NUDC	21.6492	20.7771	16.026	20.341	21.4849	21.076	22.0892	21.7037	21.9661	22.1678	22.3787	20.9895	Q9Y266	NUDC	Q9Y266	FALSE	0	-4.44706	1.48068	-1.48319	0.815152	0.286079	-5.39943	0.528313	-2.43556	0.823698	0.0957738	-3.91624	2.01151	-0.952366	0.811597	0.484849	-3.84191	2.08583	-0.878037	0.924761	0.518678	-2.88954	3.0382	0.0743297	0.837517	0.95589	FALSE	FALSE	FALSE	FALSE	FALSE	FALSE
NUDCD3	19.9129	18.5155	0	19.6503	19.3348	0	0	0	0	0	0	0	Q8IVD9	NUDCD3	Q8IVD9	TRUE	8	-14.1695	13.7984	-0.185563	0.950175	0.97665	-1.17447	26.7934	12.8095	0.792095	0.0680453	-0.988905	26.9789	12.995	0.460572	0.064823	-0.988905	26.9789	12.995	0.730446	0.064823	-13.9839	13.9839	0	0.842923	1	FALSE	FALSE	FALSE	FALSE	FALSE	FALSE
NUDT21	22.7819	0	24.2208	0	23.3449	0	0	0	22.1047	22.673	0	0	O43809	NUDT21	O43809	TRUE	7	-15.4756	31.2475	7.88592	0.890006	0.463716	-15.0622	31.6609	8.29933	0.914649	0.44138	-22.9481	23.775	0.413417	0.87747	0.968865	-23.1376	23.5855	0.223979	0.950025	0.983128	-23.551	23.1721	-0.189438	0.841214	0.98573	FALSE	FALSE	FALSE	FALSE	FALSE	FALSE
NUDT5	19.4779	19.2121	0	19.9301	20.1704	0	19.4194	19.4219	0	19.4059	0	0	Q9UKK9	NUDT5	Q9UKK9	TRUE	5	-20.4104	19.4701	-0.47017	0.949189	0.958525	-19.9906	19.8898	-0.050423	0.943527	0.99555	-19.5205	20.36	0.419747	0.876971	0.962969	-13.042	26.8384	6.89819	0.918225	0.453043	-13.4618	26.4187	6.47845	0.73672	0.480152	FALSE	FALSE	FALSE	FALSE	FALSE	FALSE
NUFIP2	19.5632	19.2795	19.6148	19.439	19.2566	18.5312	16.8568	18.7841	17.9954	0	16.9514	17.4654	Q7Z417	NUFIP2	Q7Z417	TRUE	1	-8.46063	9.28111	0.410236	0.946882	0.918777	-7.26379	10.4779	1.60708	0.931466	0.690833	-7.67403	10.0677	1.19684	0.857416	0.766607	-1.26757	16.4742	7.6033	0.770381	0.0843038	-2.46441	15.2773	6.40646	0.456327	0.136379	FALSE	FALSE	FALSE	FALSE	FALSE	FALSE
NUMA1	22.0801	22.1558	22.1246	22.0214	21.9686	21.9005	21.5213	21.4351	21.3754	21.8188	21.8782	22.6744	Q14980	NUMA1	Q14980	FALSE	0	-0.901342	1.21469	0.156673	0.933718	0.744724	-0.381766	1.73426	0.676249	0.870049	0.181576	-0.538439	1.57759	0.519576	0.748965	0.294588	-1.21828	0.897755	-0.160261	0.939732	0.739126	-1.73785	0.378178	-0.679837	0.523595	0.179499	FALSE	FALSE	FALSE	FALSE	FALSE	FALSE
NUP214	19.0111	0	0	18.7579	19.2576	0	19.9172	20.1154	18.3485	19.6299	19.4628	20.3705	P35658	NUP214	P35658	TRUE	3	-20.0919	7.42232	-6.3348	0.838126	0.323883	-26.8805	0.63377	-13.1234	0.77764	0.0592256	-20.5457	6.96857	-6.78855	0.747915	0.292408	-20.9064	6.60787	-7.14926	0.887552	0.269152	-14.1178	13.3964	-0.360705	0.837263	0.953886	FALSE	FALSE	FALSE	FALSE	FALSE	FALSE
NUP50	0	17.4761	17.5545	0	19.8452	0	19.7579	20.1218	0	19.0873	19.9737	0	Q9UKX7	NUP50	Q9UKX7	TRUE	5	-14.5525	24.676	5.06177	0.912343	0.572845	-21.2306	17.9979	-1.61638	0.938663	0.855901	-26.2924	12.9361	-6.67815	0.805666	0.459986	-26.0195	13.209	-6.40526	0.920873	0.477966	-19.3413	19.8871	0.272895	0.839968	0.975518	FALSE	FALSE	FALSE	FALSE	FALSE	FALSE
NUP98	0	23.025	0	21.3845	21.0397	21.0612	20.3516	0	20.7213	20.1669	21.1007	0	P52948	NUP98	P52948	TRUE	4	-32.4161	5.44247	-13.4868	0.622591	0.141083	-24.9453	12.9133	-6.01597	0.918792	0.489501	-11.4584	26.4001	7.47084	0.787409	0.394286	-11.5233	26.3352	7.40595	0.9115	0.398236	-18.9942	18.8644	-0.0648885	0.842205	0.993967	FALSE	FALSE	FALSE	FALSE	FALSE	FALSE
OSBPL11	0	0	0	0	0	18.4481	17.8375	17.535	0	0	0	0	Q9BXB4	OSBPL11	Q9BXB4	TRUE	9	-19.1985	6.89973	-6.14938	0.832272	0.313325	-24.84	1.25826	-11.7909	0.796611	0.0712055	-18.6906	7.40764	-5.64147	0.773352	0.352745	-6.89973	19.1985	6.14938	0.897527	0.313325	-1.25826	24.84	11.7909	0.321296	0.0712055	FALSE	FALSE	FALSE	FALSE	FALSE	FALSE
OSBPL8	18.2123	21.1871	0	18.2372	19.3992	18.2988	20.2022	19.8835	19.4707	19.6137	20.0286	22.1799	Q9BZF1	OSBPL8	Q9BZF1	TRUE	1	-15.7675	4.7437	-5.51191	0.790539	0.254251	-16.9747	3.53657	-6.71904	0.866657	0.17196	-11.4627	9.04848	-1.20713	0.86072	0.795552	-12.218	8.29326	-1.96235	0.936133	0.674595	-11.0108	9.50039	-0.755225	0.825975	0.871066	FALSE	FALSE	FALSE	FALSE	FALSE	FALSE
PA2G4	0	20.9889	0	0	20.6408	0	20.6976	20.0417	0	22.1126	0	0	Q9UQ80	PA2G4	Q9UQ80	TRUE	7	-21.3319	21.564	0.116043	0.950903	0.990478	-28.0314	14.8645	-6.58347	0.919934	0.504065	-28.1475	14.7485	-6.69951	0.814284	0.496777	-21.9386	20.9574	-0.490607	0.949204	0.959763	-15.2391	27.6569	6.2089	0.752912	0.528037	FALSE	FALSE	FALSE	FALSE	FALSE	FALSE
PABPC1	22.2909	23.412	22.8228	22.1268	22.3208	22.2352	21.9686	0	0	23.582	0	23.0458	P11940	PABPC1	P11940	TRUE	3	-15.7342	16.9629	0.614315	0.947787	0.933958	-0.829491	31.8676	15.5191	0.779477	0.0602486	-1.44381	31.2533	14.9047	0.47527	0.069129	-9.66353	23.0336	6.68502	0.908659	0.378186	-24.5683	8.12883	-8.21972	0.632793	0.283963	FALSE	FALSE	FALSE	FALSE	FALSE	FALSE
PABPN1	0	0	18.0586	0	0	0	0	0	0	19.3998	18.3788	0	Q86U42	PABPN1	Q86U42	TRUE	9	-7.32905	19.3681	6.01953	0.843101	0.333442	-7.32905	19.3681	6.01953	0.902471	0.333442	-13.3486	13.3486	0	0.880043	1	-25.9414	0.755717	-12.5929	0.721891	0.0615604	-25.9414	0.755717	-12.5929	0.292594	0.0615604	FALSE	FALSE	FALSE	FALSE	FALSE	FALSE
PAF1	0	0	0	0	17.3494	17.5006	16.6119	0	0	0	0	0	Q8N7H5	PAF1	Q8N7H5	TRUE	9	-23.9129	0.679559	-11.6167	0.310251	0.0612569	-17.8335	6.75894	-5.5373	0.902559	0.334075	-6.21686	18.3756	6.07938	0.747492	0.291537	-0.679559	23.9129	11.6167	0.72106	0.0612569	-6.75894	17.8335	5.5373	0.66756	0.334075	FALSE	FALSE	FALSE	FALSE	FALSE	FALSE
PAICS	19.7067	21.2527	0	0	20.2297	0	19.5354	17.6403	16.8293	20.9827	0	0	P22234	PAICS	P22234	TRUE	5	-11.3075	25.1273	6.90991	0.875129	0.41221	-22.5659	13.8689	-4.3485	0.926558	0.601492	-29.4758	6.95898	-11.2584	0.684984	0.195023	-18.4684	17.9664	-0.251005	0.949769	0.975756	-7.20998	29.2248	11.0074	0.555763	0.204232	FALSE	FALSE	FALSE	FALSE	FALSE	FALSE
PAK2	0	19.811	20.0767	18.7909	20.2828	19.8344	18.6394	0	19.0252	16.5215	0	0	Q13177	PAK2	Q13177	TRUE	4	-22.6883	10.008	-6.34015	0.871778	0.402208	-15.6071	17.0892	0.741032	0.941017	0.920382	-9.267	23.4294	7.08118	0.773032	0.351876	-2.21931	30.477	14.1289	0.766711	0.0821519	-9.30049	23.3959	7.04769	0.679421	0.354046	FALSE	FALSE	FALSE	FALSE	FALSE	FALSE
PAK4	0	0	0	0	0	0	18.2067	17.4507	0	0	0	0	O96013	PAK4	O96013	TRUE	10	-9.13519	9.13519	0	0.951391	1	-21.021	-2.75062	-11.8858	0.591554	0.0165042	-21.021	-2.75062	-11.8858	0.171072	0.0165042	-9.13519	9.13519	0	0.950601	1	2.75062	21.021	11.8858	0.0804876	0.0165042	FALSE	FALSE	FALSE	FALSE	FALSE	FALSE
PALM2AKAP2	18.162	18.6965	19.907	19.5853	19.8156	20.1048	22.2523	22.198	22.2776	21.9125	21.3414	21.8856	Q9Y2D5	PALM2AKAP2	Q9Y2D5	FALSE	0	-2.21343	0.386687	-0.91337	0.634506	0.146043	-4.62081	-2.0207	-3.32075	0.0220273	0.000281048	-3.70744	-1.10733	-2.40738	0.0261264	0.00240315	-3.178	-0.577886	-1.87794	0.298029	0.00982103	-0.770616	1.8295	0.529441	0.693487	0.380041	FALSE	TRUE	TRUE	FALSE	FALSE	TRUE
PARVA	0	19.9493	0	0	0	0	19.369	18.114	0	18.0205	0	18.3554	Q9NVD7	PARVA	Q9NVD7	TRUE	7	-10.121	23.4206	6.64977	0.868242	0.392181	-22.6154	10.9262	-5.84456	0.915421	0.449826	-29.2651	4.27647	-12.4943	0.604235	0.125877	-28.8961	4.64549	-12.1253	0.828965	0.135992	-16.4018	17.1398	0.369019	0.838199	0.961293	FALSE	FALSE	FALSE	FALSE	FALSE	FALSE
PCBP1	24.1322	0	0	0	23.6993	23.4066	0	0	0	23.6961	0	0	Q15365	PCBP1	Q15365	TRUE	8	-28.6655	13.3497	-7.6579	0.880678	0.429969	-12.9635	29.0517	8.04408	0.911376	0.40795	-5.30564	36.7096	15.702	0.602523	0.1248	-13.2043	28.8109	7.80327	0.914535	0.421586	-28.9063	13.1089	-7.89871	0.710847	0.416145	FALSE	FALSE	FALSE	FALSE	FALSE	FALSE
PCBP2	0	24.3317	24.3185	23.8717	23.6778	24.1244	23.1878	22.9134	0	0	23.8195	0	Q15366	PCBP2	Q15366	TRUE	4	-28.6324	13.2833	-7.67456	0.880071	0.427946	-20.1082	21.8075	0.849678	0.941309	0.92876	-12.4336	29.4821	8.52423	0.783034	0.380613	-5.00636	36.9093	15.9515	0.814201	0.11891	-13.5306	28.3851	7.42724	0.722157	0.442456	FALSE	FALSE	FALSE	FALSE	FALSE	FALSE
PCF11	0	0	0	0	17.8015	18.047	0	17.2924	0	0	0	0	O94913	PCF11	O94913	TRUE	9	-24.6681	0.769047	-11.9495	0.316181	0.0624354	-18.4827	6.95442	-5.76415	0.902153	0.331156	-6.53319	18.9039	6.18537	0.751057	0.299002	-0.769047	24.6681	11.9495	0.724253	0.0624354	-6.95442	18.4827	5.76415	0.665741	0.331156	FALSE	FALSE	FALSE	FALSE	FALSE	FALSE
PCNP	18.6942	20.2171	19.9868	20.7828	20.4388	20.1203	20.5836	19.3589	20.4736	19.6726	19.1249	19.7553	Q8WW12	PCNP	Q8WW12	FALSE	0	-2.22581	0.59664	-0.814585	0.760158	0.223362	-1.91721	0.905242	-0.505982	0.91427	0.437314	-1.10262	1.71983	0.308602	0.839273	0.631893	-0.481509	2.34094	0.929716	0.850849	0.169833	-0.790111	2.03234	0.621113	0.673912	0.344563	FALSE	FALSE	FALSE	FALSE	FALSE	FALSE
PDAP1	22.157	22.0694	21.0564	22.1257	21.946	22.0148	22.1518	22.7413	21.3857	21.9491	21.7862	20.9043	Q13442	PDAP1	Q13442	FALSE	0	-1.62296	1.0872	-0.267882	0.925198	0.664567	-1.68709	1.02307	-0.332007	0.925984	0.592076	-1.4192	1.29095	-0.0641253	0.872915	0.916894	-0.872768	1.83739	0.482311	0.916809	0.440546	-0.808643	1.90151	0.546436	0.695773	0.384525	FALSE	FALSE	FALSE	FALSE	FALSE	FALSE
PDCD5	0	16.1144	0	0	0	0	15.4881	0	17.1516	18.0386	0	0	O14737	PDCD5	O14737	TRUE	8	-9.53491	20.2778	5.37146	0.882191	0.435091	-20.4148	9.39792	-5.50845	0.912982	0.423892	-25.7863	4.02646	-10.8799	0.614728	0.132751	-20.9192	8.89351	-6.01286	0.909562	0.384385	-10.0393	19.7734	4.86706	0.735948	0.478036	FALSE	FALSE	FALSE	FALSE	FALSE	FALSE
PDLIM1	20.7566	19.5543	0	19.6589	20.8486	19.3947	20.6257	21.0857	20.5299	19.945	19.9468	18.9108	O00151	PDLIM1	O00151	TRUE	1	-16.8913	3.83038	-6.53047	0.712637	0.187108	-17.671	3.0507	-7.31015	0.85519	0.14453	-11.1405	9.58116	-0.779681	0.868318	0.868273	-9.99429	10.7274	0.366556	0.948408	0.93781	-9.21461	11.5071	1.14624	0.81614	0.807544	FALSE	FALSE	FALSE	FALSE	FALSE	FALSE
PDLIM4	22.8069	21.5679	21.9456	21.9332	22.577	22.6096	22.7195	22.4755	0	22.7952	22.6224	22.3401	P50479	PDLIM4	P50479	TRUE	1	-11.8337	11.3007	-0.266469	0.949242	0.959478	-4.52541	18.609	7.04179	0.876192	0.201152	-4.25894	18.8755	7.30826	0.677028	0.186158	-11.7798	11.3546	-0.212635	0.949485	0.967658	-19.0881	4.0463	-7.52089	0.517016	0.174898	FALSE	FALSE	FALSE	FALSE	FALSE	FALSE
PDLIM5	20.898	21.6576	21.4097	21.5951	21.8905	20.9323	22.051	21.9509	22.066	21.6446	21.3887	21.9278	Q96HC4	PDLIM5	Q96HC4	FALSE	0	-1.28982	0.988136	-0.150842	0.936085	0.770757	-1.83983	0.438131	-0.700848	0.8749	0.196781	-1.68898	0.588973	-0.550006	0.752553	0.302216	-1.32004	0.957917	-0.181061	0.939082	0.726809	-0.770034	1.50792	0.368944	0.73718	0.481423	FALSE	FALSE	FALSE	FALSE	FALSE	FALSE
PDLIM7	19.2921	0	20.2453	20.1992	18.7797	18.7244	19.7793	19.1352	19.4643	19.8917	18.8816	0	Q9NR12	PDLIM7	Q9NR12	TRUE	2	-20.2217	8.11109	-6.05531	0.854619	0.357944	-20.4469	7.88592	-6.28049	0.903532	0.341234	-14.3916	13.9412	-0.22517	0.877737	0.972033	-7.85638	20.4764	6.31003	0.902357	0.339085	-7.63121	20.7016	6.5352	0.660567	0.323048	FALSE	FALSE	FALSE	FALSE	FALSE	FALSE
PES1	21.8804	0	0	23.0772	22.097	0	22.1731	21.5053	21.149	0	0	0	O00541	PES1	O00541	TRUE	6	-23.8181	8.28887	-7.76461	0.825214	0.301486	-30.3692	1.7378	-14.3157	0.800803	0.0743408	-22.6045	9.50241	-6.55107	0.782539	0.37911	-0.995386	31.1116	15.0581	0.72519	0.0627881	5.55568	37.6626	21.6092	0.0737358	0.0140109	FALSE	FALSE	FALSE	FALSE	FALSE	FALSE
PEX14	18.2692	0	0	18.6462	18.6005	18.7396	0	0	0	0	0	0	O75381	PEX14	O75381	TRUE	8	-21.9247	-3.22002	-12.5724	0.0415386	0.0141014	-3.26263	15.4421	6.08973	0.867519	0.174331	9.30975	28.0145	18.6621	0.0150777	0.00150392	9.30975	28.0145	18.6621	0.0322767	0.00150392	-9.35236	9.35236	0	0.842923	1	TRUE	FALSE	TRUE	TRUE	FALSE	TRUE
PFKP	19.8178	20.6814	20.4444	19.4582	19.1033	19.8377	19.9203	19.3551	16.7268	21.1835	21.2847	19.3406	Q01813	PFKP	Q01813	FALSE	0	-1.24566	2.94186	0.848099	0.864641	0.382489	-0.44661	3.74091	1.64715	0.834004	0.108581	-1.29471	2.89281	0.799052	0.792007	0.409454	-3.23026	0.957259	-1.1365	0.882328	0.2499	-4.02932	0.158206	-1.93556	0.306318	0.0659817	FALSE	FALSE	FALSE	FALSE	FALSE	FALSE
PFN1	24.043	24.9291	24.7339	24.6842	23.9372	23.9014	23.7884	23.5254	23.5744	23.9084	24.241	24.5417	P07737	PFN1	P07737	FALSE	0	-0.766463	1.55522	0.394378	0.88929	0.460932	-0.221567	2.10011	0.939273	0.827493	0.100211	-0.615945	1.70574	0.544895	0.758329	0.31512	-1.21693	1.10475	-0.0560868	0.947558	0.915157	-1.76182	0.559859	-0.600982	0.622251	0.270841	FALSE	FALSE	FALSE	FALSE	FALSE	FALSE
PGAM1	0	23.4	23.0033	23.2712	0	22.3858	20.9752	21.0518	21.7011	22.8311	22.8623	22.5705	P18669	PGAM1	P18669	TRUE	2	-16.3623	16.8598	0.248772	0.950015	0.973648	-22.386	10.8361	-5.77496	0.915516	0.450881	-22.6348	10.5873	-6.02373	0.798471	0.432285	-24.1467	9.07537	-7.53568	0.900853	0.330705	-18.123	15.0991	-1.51194	0.821472	0.841068	FALSE	FALSE	FALSE	FALSE	FALSE	FALSE
PGRMC2	22.1581	22.1486	21.6861	21.0305	22.4683	18.6756	22.4958	21.0396	22.3188	22.4617	21.9089	22.2416	O15173	PGRMC2	O15173	FALSE	0	-0.823171	3.36876	1.27279	0.734279	0.202173	-2.04978	2.14215	0.0461814	0.94241	0.961241	-3.32258	0.869352	-1.22661	0.703072	0.217538	-3.57524	0.61669	-1.47927	0.83519	0.144421	-2.34863	1.8433	-0.252662	0.813339	0.790748	FALSE	FALSE	FALSE	FALSE	FALSE	FALSE
PIP4K2C	17.5251	19.5323	20.2881	17.7588	17.7788	20.2448	20.3247	20.3503	21.0948	19.0122	19.3107	20.1253	Q8TBX8	PIP4K2C	Q8TBX8	FALSE	0	-1.60404	2.64618	0.521073	0.915344	0.591796	-3.59986	0.65036	-1.47475	0.857935	0.150467	-4.12093	0.129287	-1.99582	0.452265	0.0625204	-3.01372	1.23651	-0.888604	0.90712	0.367995	-1.01789	3.23233	1.10722	0.619879	0.268005	FALSE	FALSE	FALSE	FALSE	FALSE	FALSE
PKM	27.9999	28.9813	0	28.8891	27.6526	27.7691	27.7391	27.0949	27.235	27.9276	0	29.1734	P14618	PKM	P14618	TRUE	2	-29.6923	11.4726	-9.10985	0.847312	0.341992	-28.9451	12.2199	-8.36259	0.908457	0.381101	-19.8352	21.3297	0.74726	0.874647	0.936185	-11.5125	29.6524	9.06993	0.903213	0.344003	-12.2598	28.9051	8.32267	0.695141	0.383279	FALSE	FALSE	FALSE	FALSE	FALSE	FALSE
PLA2G4A	22.5139	22.0343	21.0786	22.5333	21.6772	21.6432	21.9889	22.324	22.1948	21.2379	21.992	23.3164	P47712	PLA2G4A	P47712	FALSE	0	-1.63451	1.48325	-0.0756321	0.94664	0.914805	-1.85254	1.26521	-0.293665	0.930882	0.679301	-1.77691	1.34085	-0.218033	0.856441	0.758356	-1.78977	1.32799	-0.230892	0.940019	0.744671	-1.57174	1.54602	-0.0128593	0.841184	0.985483	FALSE	FALSE	FALSE	FALSE	FALSE	FALSE
PLEKHA1	18.7121	18.6105	18.6059	0	18.8476	18.9146	19.1707	19.0709	0	18.2602	18.7675	18.7967	Q9HB21	PLEKHA1	Q9HB21	TRUE	2	-7.66372	19.7747	6.05547	0.847915	0.343251	-7.82352	19.6149	5.89567	0.905384	0.355491	-13.879	13.5594	-0.159794	0.878362	0.979504	-19.7399	7.69845	-6.02074	0.903535	0.345884	-19.5801	7.85824	-5.86095	0.681764	0.358194	FALSE	FALSE	FALSE	FALSE	FALSE	FALSE
PLIN3	22.3661	21.7627	20.4038	19.6935	22.029	22.2866	22.6482	22.263	23.0565	22.4309	21.3416	22.0095	O60664	PLIN3	O60664	FALSE	0	-1.73958	2.08864	0.174528	0.941691	0.840794	-3.0591	0.769125	-1.14499	0.878242	0.208387	-3.23362	0.594597	-1.31951	0.641692	0.152885	-2.50509	1.32313	-0.590978	0.923194	0.501636	-1.18558	2.64265	0.728535	0.708356	0.41066	FALSE	FALSE	FALSE	FALSE	FALSE	FALSE
PLS3	20.0309	21.905	21.5224	20.1338	19.656	20.1188	19.4722	18.2543	17.4786	19.3794	19.189	21.4612	P13797	PLS3	P13797	FALSE	0	-0.759711	3.12612	1.1832	0.732713	0.20101	0.808123	4.69395	2.75104	0.532865	0.0108827	-0.375082	3.51075	1.56783	0.558945	0.100998	-1.98322	1.90261	-0.0403024	0.949338	0.963508	-3.55105	0.334779	-1.60814	0.378126	0.0937482	FALSE	FALSE	FALSE	FALSE	FALSE	FALSE
PNISR	20.3394	19.919	20.2548	20.0278	20.1589	20.2379	19.5814	20.1255	19.7549	19.3665	19.5725	19.3115	Q8TF01	PNISR	Q8TF01	FALSE	0	-0.997963	1.05701	0.0295234	0.948681	0.949471	-0.67705	1.37792	0.350437	0.916257	0.459237	-0.706573	1.3484	0.320913	0.814294	0.496821	-0.302804	1.75217	0.724683	0.835358	0.144661	-0.623717	1.43126	0.403769	0.701566	0.396245	FALSE	FALSE	FALSE	FALSE	FALSE	FALSE
PNN	22.2737	21.9645	22.0565	22.7855	22.452	0	23.6027	23.7746	23.8502	23.6356	23.473	23.647	Q9H307	PNN	Q9H307	TRUE	1	-4.54083	18.5789	7.01905	0.734341	0.202219	-13.2041	9.91564	-1.64424	0.934476	0.754412	-20.2232	2.89659	-8.66328	0.601124	0.123929	-20.0659	3.05386	-8.50602	0.824154	0.130012	-11.4026	11.7171	0.157261	0.840035	0.976062	FALSE	FALSE	FALSE	FALSE	FALSE	FALSE
PPIP5K2	18.2782	0	0	18.2764	18.8961	19.0731	0	18.0357	18.6598	0	0	0	O43314	PPIP5K2	O43314	TRUE	6	-25.8859	0.574261	-12.6558	0.296751	0.0586498	-19.3692	7.09097	-6.13909	0.90061	0.320373	-6.71335	19.7468	6.51671	0.74831	0.293224	5.51847	31.9786	18.7485	0.322283	0.0108365	-0.998238	25.4619	12.2318	0.30624	0.0659555	FALSE	FALSE	FALSE	FALSE	FALSE	FALSE
PPME1	19.8959	19.1247	0	0	19.9203	19.9348	20.1708	20.4664	20.0156	19.4093	19.463	18.806	Q9Y570	PPME1	Q9Y570	TRUE	2	-14.52	13.9636	-0.278173	0.94958	0.965637	-21.4526	7.03104	-7.21076	0.894228	0.280817	-21.1744	7.30922	-6.93259	0.75086	0.298581	-20.1829	8.3007	-5.9411	0.907286	0.369072	-13.2503	15.2333	0.991486	0.826988	0.878042	FALSE	FALSE	FALSE	FALSE	FALSE	FALSE
PPP1CB	0	0	0	0	21.4687	0	20.86	0	20.6543	0	0	23.5107	P62140	PPP1CB	P62140	TRUE	8	-26.5325	12.22	-7.15625	0.87891	0.42414	-33.2143	5.53812	-13.8381	0.853104	0.140251	-26.0581	12.6944	-6.68185	0.804275	0.454428	-20.0569	18.6956	-0.680668	0.948424	0.938248	-13.375	25.3774	6.00118	0.743827	0.500328	FALSE	FALSE	FALSE	FALSE	FALSE	FALSE
PPP1R10	18.9789	0	0	0	19.9504	20.2953	20.6769	19.7386	20.7697	20.3388	19.6166	18.8471	Q96QC0	PPP1R10	Q96QC0	TRUE	3	-21.2312	7.05337	-7.08891	0.814635	0.28533	-28.211	0.0735333	-14.0688	0.760851	0.0509662	-21.1221	7.16244	-6.97984	0.747877	0.292329	-20.3279	7.95666	-6.18563	0.903796	0.34742	-13.3481	14.9365	0.794214	0.830301	0.901461	FALSE	FALSE	FALSE	FALSE	FALSE	FALSE
PPP1R18	17.5874	0	17.2447	17.4561	17.3333	17.4303	18.1414	17.9128	0	18.3798	17.3572	17.6434	Q6NYC8	PPP1R18	Q6NYC8	TRUE	2	-18.605	7.01327	-5.79586	0.842315	0.331892	-13.2165	12.4018	-0.407337	0.941834	0.944087	-7.4206	18.1976	5.38852	0.777826	0.365235	-13.196	12.4222	-0.386883	0.94874	0.94689	-18.5845	7.03372	-5.7754	0.667209	0.33351	FALSE	FALSE	FALSE	FALSE	FALSE	FALSE
PPP1R37	20.0638	19.7631	17.4997	19.9021	20.2621	20.1911	0	19.0207	0	19.3293	18.9713	19.3342	O75864	PPP1R37	O75864	TRUE	2	-10.8237	8.80463	-1.00952	0.940192	0.820777	2.95452	22.5828	12.7687	0.591579	0.0165075	3.96404	23.5923	13.7782	0.139508	0.0113645	-8.90734	10.721	0.906808	0.944453	0.838701	-22.6855	-3.05723	-12.8714	0.0789927	0.015889	FALSE	FALSE	FALSE	FALSE	FALSE	FALSE
PPP4R3A	17.3503	17.2066	0	17.5702	0	17.4279	0	0	0	0	0	0	Q6IN85	PPP4R3A	Q6IN85	TRUE	8	-12.7061	12.4119	-0.147093	0.950321	0.97939	-1.04001	24.0779	11.5189	0.791662	0.0677534	-0.89292	24.225	11.666	0.460891	0.0649134	-0.89292	24.225	11.666	0.730674	0.0649134	-12.559	12.559	0	0.842923	1	FALSE	FALSE	FALSE	FALSE	FALSE	FALSE
PRDX1	25.1576	25.4939	25.4173	25.4401	24.7129	24.6857	24.8882	23.9611	24.3267	25.2582	0	25.2667	Q06830	PRDX1	Q06830	TRUE	1	-12.5021	13.3221	0.410002	0.948379	0.94417	-11.9479	13.8764	0.96426	0.939169	0.869267	-12.3579	13.4664	0.554257	0.873612	0.924587	-4.80751	21.0167	8.10461	0.86024	0.188775	-5.36177	20.4625	7.55035	0.571505	0.217881	FALSE	FALSE	FALSE	FALSE	FALSE	FALSE
PRIM2	0	0	0	0	0	0	16.8538	17.0859	0	0	0	0	P49643	PRIM2	P49643	TRUE	10	-8.69499	8.69499	0	0.951391	1	-20.0082	-2.61826	-11.3132	0.591544	0.0165029	-20.0082	-2.61826	-11.3132	0.171066	0.0165029	-8.69499	8.69499	0	0.950601	1	2.61826	20.0082	11.3132	0.0804846	0.0165029	FALSE	FALSE	FALSE	FALSE	FALSE	FALSE
PRPF3	19.5706	0	0	19.2245	21.2889	21.7481	21.0982	18.8626	20.5732	18.5307	20.1163	21.3357	O43395	PRPF3	O43395	TRUE	2	-24.4399	-4.02067	-14.2303	0.0378902	0.0117863	-23.8641	-3.44485	-13.6545	0.574157	0.0144589	-9.63382	10.7854	0.575812	0.871454	0.901043	-9.45003	10.9692	0.7596	0.945761	0.869749	-10.0258	10.3934	0.183788	0.839079	0.968329	TRUE	FALSE	FALSE	FALSE	FALSE	TRUE
PRRC2A	18.8708	18.897	18.9202	18.766	19.6225	19.5405	19.2379	19.3811	19.3351	19.1793	17.9544	17.881	P48634	PRRC2A	P48634	FALSE	0	-1.64888	0.821518	-0.413681	0.890869	0.467123	-1.65727	0.81313	-0.422069	0.916186	0.458424	-1.24359	1.22681	-0.0083874	0.879068	0.98805	-0.263782	2.20662	0.971417	0.803599	0.108677	-0.255395	2.215	0.979804	0.404692	0.106076	FALSE	FALSE	FALSE	FALSE	FALSE	FALSE
PRRC2C	19.1935	19.0365	18.8759	18.1047	17.6328	0	19.3809	20.6569	19.2809	19.0798	19.5	18.7683	Q9Y520	PRRC2C	Q9Y520	TRUE	1	-2.06076	16.3063	7.12276	0.540939	0.112955	-9.92116	8.44588	-0.737641	0.9388	0.859504	-17.0439	1.32312	-7.8604	0.520768	0.0846657	-16.387	1.98	-7.20352	0.804482	0.109474	-8.52664	9.8404	0.656879	0.826508	0.874728	FALSE	FALSE	FALSE	FALSE	FALSE	FALSE
PSMD1	22.9663	24.7481	24.1747	23.7649	22.7978	0	22.2481	21.7953	22.3649	22.5098	22.9187	24.7298	Q99460	PSMD1	Q99460	TRUE	1	-3.53431	20.4186	8.44213	0.631729	0.144863	-10.1495	13.8033	1.8269	0.933702	0.737365	-18.5917	5.36121	-6.61523	0.720099	0.242287	-19.8417	4.1112	-7.86523	0.851499	0.171042	-13.2264	10.7264	-1.25001	0.817872	0.818202	FALSE	FALSE	FALSE	FALSE	FALSE	FALSE
PSMD12	0	24.443	0	23.56	22.7596	22.3074	22.3619	21.5721	20.3747	22.119	22.649	23.3188	O00232	PSMD12	O00232	TRUE	2	-27.2659	-2.19011	-14.728	0.0940484	0.026248	-25.8265	-0.750702	-13.2886	0.731393	0.0400953	-11.0985	13.9773	1.43941	0.861264	0.800461	-12.3578	12.718	0.180106	0.949733	0.974724	-13.7972	11.2786	-1.25931	0.818945	0.824919	FALSE	FALSE	FALSE	FALSE	FALSE	FALSE
PSMD2	0	0	0	0	22.9548	21.8342	22.4715	20.8333	21.9327	22.4481	0	0	Q13200	PSMD2	Q13200	TRUE	6	-31.1278	1.26852	-14.9296	0.336515	0.0666489	-37.944	-5.54766	-21.7458	0.57164	0.0141947	-23.0143	9.38198	-6.81618	0.77778	0.365104	-8.75123	23.6451	7.44693	0.89972	0.324613	-1.93505	30.4613	14.2631	0.337596	0.077435	FALSE	FALSE	FALSE	FALSE	FALSE	FALSE
PSMD8	21.1425	21.6939	22.0243	22.1159	21.3279	21.4144	21.6961	21.5818	21.7877	21.2143	21.374	21.9147	P48556	PSMD8	P48556	FALSE	0	-1.15949	1.16117	0.000840018	0.951326	0.998726	-1.22862	1.09205	-0.0682849	0.940179	0.896771	-1.22946	1.09121	-0.069125	0.870936	0.895509	-1.04196	1.27871	0.118375	0.94373	0.822222	-0.972833	1.34783	0.1875	0.800947	0.722518	FALSE	FALSE	FALSE	FALSE	FALSE	FALSE
PSPC1	19.4254	19.5409	19.8355	20.0066	19.9753	19.9978	17.1384	17.189	20.0438	18.844	0	19.2832	Q8WXF1	PSPC1	Q8WXF1	TRUE	1	-10.2605	9.47526	-0.392607	0.947559	0.930085	-8.39102	11.3447	1.47685	0.93392	0.742112	-7.99841	11.7373	1.86946	0.846014	0.677604	-2.58372	17.152	7.28415	0.823257	0.128944	-4.45318	15.2826	5.41469	0.599463	0.245162	FALSE	FALSE	FALSE	FALSE	FALSE	FALSE
PTMA	20.8203	0	17.8817	0	20.1318	19.5726	20.5693	20.2881	0	21.9041	0	0	P06454	PTMA	P06454	TRUE	5	-21.1794	20.5111	-0.334135	0.949915	0.971797	-21.5637	20.1268	-0.718459	0.941675	0.93941	-21.2296	20.4609	-0.384325	0.87736	0.967563	-14.9118	26.7787	5.93346	0.926171	0.534805	-14.5275	27.163	6.31779	0.746857	0.509319	FALSE	FALSE	FALSE	FALSE	FALSE	FALSE
PTPN1	0	17.512	17.6039	18.0817	17.2978	17.5722	0	18.9179	18.9105	19.8783	19.6685	21.2007	P18031	PTPN1	P18031	TRUE	2	-19.1462	7.25569	-5.94526	0.8434	0.334033	-14.1051	12.2968	-0.904173	0.939567	0.879995	-8.15986	18.242	5.04109	0.791924	0.409173	-15.7995	10.6024	-2.5986	0.935608	0.665888	-20.8406	5.56126	-7.63969	0.576288	0.222258	FALSE	FALSE	FALSE	FALSE	FALSE	FALSE
PTPN11	0	0	0	0	0	0	0	17.5429	18.4752	20.1645	0	21.8787	Q06124	PTPN11	Q06124	TRUE	8	-14.1535	14.1535	0	0.951391	1	-26.1596	2.14749	-12.006	0.815399	0.0870417	-26.1596	2.14749	-12.006	0.526856	0.0870417	-28.1679	0.139119	-14.0144	0.691701	0.051842	-16.1619	12.1452	-2.00837	0.807056	0.754974	FALSE	FALSE	FALSE	FALSE	FALSE	FALSE
PTPN12	0	17.8607	0	18.1668	17.4428	18.671	19.588	19.5489	18.7926	0	0	18.1341	Q05209	PTPN12	Q05209	TRUE	4	-25.1532	0.873206	-12.14	0.323747	0.0639709	-26.3694	-0.343068	-13.3563	0.746991	0.0453717	-14.2295	11.7969	-1.21627	0.865151	0.836869	-0.964331	25.062	12.0489	0.732463	0.0656311	0.251943	26.2783	13.2651	0.237463	0.0465581	FALSE	FALSE	FALSE	FALSE	FALSE	FALSE
PUF60	21.5133	21.3909	21.2885	21.2396	21.8821	21.6085	21.1929	21.1899	21.0761	21.1857	21.3296	20.6677	Q9UHX1	PUF60	Q9UHX1	FALSE	0	-1.2385	0.88009	-0.179205	0.930293	0.710171	-0.814724	1.30387	0.244571	0.92726	0.613272	-0.635519	1.48307	0.423776	0.785471	0.388141	-0.543547	1.57504	0.515748	0.894444	0.298487	-0.967323	1.15127	0.0919723	0.822578	0.848288	FALSE	FALSE	FALSE	FALSE	FALSE	FALSE
PUS7	18.6284	21.0551	20.2126	19.8639	18.0642	0	18.3613	18.9819	18.6501	17.7453	18.2426	20.6695	Q96PZ0	PUS7	Q96PZ0	TRUE	1	-2.57476	17.2201	7.32267	0.588356	0.128181	-8.59654	11.1983	1.3009	0.935269	0.772429	-15.9192	3.87566	-6.02177	0.69039	0.201391	-16.1405	3.65434	-6.2431	0.859336	0.186806	-10.1188	9.67611	-0.221325	0.83812	0.960663	FALSE	FALSE	FALSE	FALSE	FALSE	FALSE
RAB11FIP5	19.5568	20.691	20.4439	20.8208	20.1155	18.8249	19.1523	20.2877	19.6491	17.9968	18.7368	20.3855	Q9BXF6	RAB11FIP5	Q9BXF6	FALSE	0	-1.5397	2.16008	0.310186	0.930546	0.7126	-1.31568	2.38409	0.534205	0.92179	0.529026	-1.62587	2.07391	0.224019	0.860079	0.789816	-0.969203	2.73058	0.880686	0.896589	0.308683	-1.19322	2.50656	0.656667	0.721858	0.441727	FALSE	FALSE	FALSE	FALSE	FALSE	FALSE
RAB1A	0	0	0	0	0	0	22.3771	21.774	0	0	0	0	P62820	RAB1A	P62820	TRUE	10	-11.2848	11.2848	0	0.951391	1	-26.0018	-3.43227	-14.717	0.590135	0.0163215	-26.0018	-3.43227	-14.717	0.170191	0.0163215	-11.2848	11.2848	0	0.950601	1	3.43227	26.0018	14.717	0.0800542	0.0163215	FALSE	FALSE	FALSE	FALSE	FALSE	FALSE
RAB3GAP1	18.1828	0	0	0	18.1007	18.2645	19.7671	18.2211	18.3551	0	0	0	Q15042	RAB3GAP1	Q15042	TRUE	6	-19.2112	7.08962	-6.06078	0.837909	0.323479	-25.8705	0.430264	-12.7201	0.772297	0.0563933	-19.8098	6.49105	-6.65936	0.74209	0.280737	-1.02867	25.2721	12.1217	0.734897	0.0666272	5.63068	31.9315	18.7811	0.0597761	0.0104139	FALSE	FALSE	FALSE	FALSE	FALSE	FALSE
RABL3	20.1538	21.5292	20.5444	20.4044	18.9455	19.8486	19.0875	19.3332	19.8528	18.9886	20.1254	21.1113	Q5HYI8	RABL3	Q5HYI8	FALSE	0	-0.646402	2.66562	1.00961	0.732094	0.200553	-0.338055	2.97397	1.31796	0.83138	0.105085	-1.34767	1.96436	0.308347	0.846736	0.68278	-1.99829	1.31373	-0.342279	0.934651	0.650457	-2.30664	1.00539	-0.650626	0.701611	0.396338	FALSE	FALSE	FALSE	FALSE	FALSE	FALSE
RAI14	22.7074	22.1996	22.3777	22.5398	22.6571	22.4289	24.2658	24.3721	23.709	23.6429	23.5727	23.0352	Q9P0K7	RAI14	Q9P0K7	FALSE	0	-1.20004	0.972589	-0.113727	0.939951	0.81766	-2.77371	-0.601083	-1.6874	0.449636	0.00667117	-2.65999	-0.487357	-1.57367	0.125025	0.00967693	-1.96131	0.211321	-0.874994	0.795196	0.101535	-0.387638	1.78499	0.698678	0.523076	0.179131	FALSE	FALSE	FALSE	FALSE	FALSE	FALSE
RALY	0	0	0	18.4921	0	20.5491	0	0	0	0	0	0	Q9UKM9	RALY	Q9UKM9	TRUE	10	-23.0409	-2.98649	-13.0137	0.044099	0.016702	-10.0272	10.0272	0	0.943668	1	2.98649	23.0409	13.0137	0.17201	0.016702	2.98649	23.0409	13.0137	0.433104	0.016702	-10.0272	10.0272	0	0.842923	1	TRUE	FALSE	FALSE	FALSE	FALSE	TRUE
RAN	0	0	0	0	23.5559	0	23.3844	23.2007	0	23.7203	0	0	P62826	RAN	P62826	TRUE	8	-28.6202	12.9163	-7.85195	0.875602	0.413666	-36.2966	5.23986	-15.5284	0.84463	0.124687	-28.4446	13.0918	-7.67641	0.796126	0.423788	-20.823	20.7134	-0.0548209	0.950444	0.995354	-13.1466	28.3898	7.62158	0.715632	0.426983	FALSE	FALSE	FALSE	FALSE	FALSE	FALSE
RANBP1	17.9203	0	0	0	17.431	0	17.4627	17.329	0	0	18.6757	0	P43487	RANBP1	P43487	TRUE	7	-18.0534	18.3796	0.163112	0.950577	0.984243	-23.8403	12.5927	-5.62378	0.91975	0.501676	-24.0034	12.4296	-5.78689	0.812698	0.489687	-18.6314	17.8016	-0.414914	0.949211	0.959934	-12.8445	23.5885	5.37197	0.750526	0.520539	FALSE	FALSE	FALSE	FALSE	FALSE	FALSE
RANBP2	22.7039	24.3434	0	23.1917	22.2782	22.0504	22.1641	21.7302	23.6759	22.3991	24.3256	24.6696	P49792	RANBP2	P49792	TRUE	1	-18.956	5.30731	-6.82433	0.771885	0.234391	-18.9726	5.29069	-6.84095	0.884573	0.233344	-12.1483	12.115	-0.0166239	0.879847	0.997588	-13.423	10.8403	-1.29134	0.943392	0.814671	-13.4064	10.8569	-1.27471	0.817679	0.817007	FALSE	FALSE	FALSE	FALSE	FALSE	FALSE
RANBP3	19.8128	18.1491	0	19.2551	20.7453	19.5525	19.1393	19.3538	19.2708	18.9452	17.7315	18.3847	Q9H6Z4	RANBP3	Q9H6Z4	TRUE	1	-16.9773	2.58332	-7.19698	0.593467	0.129992	-16.381	3.17963	-6.60067	0.86231	0.160711	-9.18399	10.3766	0.596312	0.870706	0.893076	-8.28315	11.2774	1.49715	0.939594	0.736482	-8.87947	10.6811	0.900834	0.821184	0.839201	FALSE	FALSE	FALSE	FALSE	FALSE	FALSE
RANGAP1	17.7915	19.4412	17.7141	20.2265	20.3371	20.1852	21.1364	20.8526	21.0021	21.45	20.1182	20.1535	P46060	RANGAP1	P46060	FALSE	0	-3.39765	-0.470293	-1.93397	0.0429019	0.0153317	-4.14512	-1.21776	-2.68144	0.262174	0.00256627	-2.21115	0.71621	-0.747469	0.740129	0.276961	-1.78802	1.13934	-0.324336	0.933155	0.627423	-1.04055	1.88681	0.423133	0.753087	0.528592	TRUE	FALSE	FALSE	FALSE	FALSE	TRUE
RARS1	22.8206	23.8914	23.6484	23.2092	22.745	22.5185	23.1097	22.8693	22.8326	23.0211	23.0435	23.7578	P54136	RARS1	P54136	FALSE	0	-0.566328	1.82485	0.629263	0.798297	0.263503	-0.679309	1.71187	0.516282	0.905104	0.35328	-1.30857	1.08261	-0.112981	0.864968	0.835096	-1.6455	0.745686	-0.449905	0.913805	0.415774	-1.53251	0.858667	-0.336924	0.756247	0.538796	FALSE	FALSE	FALSE	FALSE	FALSE	FALSE
RBM10	22.8818	21.1531	21.0453	22.3015	21.4726	22.4383	22.488	22.4222	22.4057	21.9289	20.6649	21.4281	P98175	RBM10	P98175	FALSE	0	-1.89025	1.13546	-0.377391	0.914367	0.585487	-2.25808	0.767631	-0.745222	0.896361	0.293201	-1.88068	1.14502	-0.367831	0.833266	0.594862	-0.782707	2.243	0.730147	0.895295	0.302466	-0.414876	2.61083	1.09798	0.453847	0.134682	FALSE	FALSE	FALSE	FALSE	FALSE	FALSE
RBM17	17.3584	16.8066	0	0	18.849	17.1396	0	16.7866	17.2316	0	0	0	Q96I25	RBM17	Q96I25	TRUE	6	-15.9767	14.761	-0.607847	0.947584	0.930498	-15.3199	15.4178	0.0489442	0.94349	0.994395	-14.712	16.0256	0.656791	0.873642	0.92492	-3.37265	27.365	11.9962	0.806125	0.110983	-4.02944	26.7082	11.3394	0.445392	0.129103	FALSE	FALSE	FALSE	FALSE	FALSE	FALSE
RBM26	20.4336	0	0	20.1495	20.2359	20.1359	19.8075	19.9826	0	0	19.3362	0	Q5T8P6	RBM26	Q5T8P6	TRUE	5	-30.9334	4.20829	-13.3626	0.561317	0.119174	-24.023	11.1187	-6.45216	0.913257	0.42671	-10.6605	24.4813	6.91041	0.787903	0.395877	-3.8425	31.2992	13.7284	0.805801	0.110682	-10.7529	24.3888	6.81796	0.704304	0.401967	FALSE	FALSE	FALSE	FALSE	FALSE	FALSE
RBM33	19.9722	0	0	19.3384	19.1096	19.2395	18.3802	18.0649	0	17.98	0	18.0134	Q96EV2	RBM33	Q96EV2	TRUE	4	-29.1377	3.99417	-12.5718	0.563452	0.119852	-22.0569	11.075	-5.49095	0.917319	0.471585	-9.48513	23.6468	7.08083	0.775246	0.357953	-9.33459	23.7973	7.23137	0.903949	0.348327	-16.4154	16.7165	0.15054	0.841005	0.984008	FALSE	FALSE	FALSE	FALSE	FALSE	FALSE
RBM39	21.1413	23.0076	22.796	0	0	0	21.0843	20.7686	0	0	21.2802	0	Q14498	RBM39	Q14498	TRUE	6	7.06053	37.5694	22.315	0.0311409	0.00919687	-6.89044	23.6185	8.36401	0.887304	0.245495	-29.2054	1.30348	-13.951	0.472886	0.0684096	-22.3479	8.16105	-7.0934	0.898725	0.31941	-8.39688	22.112	6.85757	0.66805	0.334868	TRUE	FALSE	FALSE	FALSE	FALSE	TRUE
RCC2	21.6571	23.0738	0	21.4982	21.3015	0	21.3042	17.5157	16.7161	20.5674	0	22.9656	Q9P258	RCC2	Q9P258	TRUE	3	-18.8077	20.0951	0.643693	0.948244	0.941821	-23.0531	15.8497	-3.60171	0.931143	0.68443	-23.6968	15.206	-4.2454	0.839373	0.632539	-19.6958	19.207	-0.244401	0.949843	0.97789	-15.4504	23.4524	4.001	0.786094	0.652012	FALSE	FALSE	FALSE	FALSE	FALSE	FALSE
RDX	0	21.7433	0	20.9779	20.4784	21.1489	19.6641	0	19.587	18.3783	19.4693	21.5205	P35241	RDX	P35241	TRUE	3	-28.6349	1.39371	-13.6206	0.35355	0.0702766	-20.8502	9.17841	-5.83591	0.910668	0.401196	-7.22961	22.799	7.78471	0.736506	0.270176	-13.9353	16.0934	1.07903	0.945941	0.87414	-21.72	8.30865	-6.70567	0.669883	0.337857	FALSE	FALSE	FALSE	FALSE	FALSE	FALSE
REPS1	18.8081	18.0121	18.1605	18.5273	0	18.6493	18.4649	18.6924	18.807	18.0307	17.4689	18.3641	Q96D71	REPS1	Q96D71	TRUE	1	-3.59621	15.4655	5.93465	0.719973	0.191982	-9.85876	9.20297	-0.327896	0.941678	0.939521	-15.7934	3.26832	-6.26255	0.661943	0.170834	-15.0932	3.96855	-5.56231	0.872311	0.218702	-8.83063	10.2311	0.700234	0.826018	0.871361	FALSE	FALSE	FALSE	FALSE	FALSE	FALSE
RFPL4A	0	0	0	0	18.1637	0	18.7253	18.8797	0	18.2373	18.1051	0	A6NLU0	RFPL4A	A6NLU0	TRUE	7	-22.2944	10.1853	-6.05458	0.877603	0.419936	-28.7748	3.70485	-12.535	0.838145	0.114464	-22.7203	9.75943	-6.48041	0.785837	0.389289	-22.2994	10.1803	-6.05956	0.914283	0.419568	-15.819	16.6607	0.420856	0.837331	0.954421	FALSE	FALSE	FALSE	FALSE	FALSE	FALSE
RIC8A	0	0	0	0	0	0	0	19.5012	20.9672	0	0	0	Q9NPQ8	RIC8A	Q9NPQ8	TRUE	10	-10.368	10.368	0	0.951391	1	-23.8574	-3.12146	-13.4894	0.59157	0.0165063	-23.8574	-3.12146	-13.4894	0.171082	0.0165063	-10.368	10.368	0	0.950601	1	3.12146	23.8574	13.4894	0.0804925	0.0165063	FALSE	FALSE	FALSE	FALSE	FALSE	FALSE
RIPK2	0	0	0	0	0	0	18.9872	17.9043	0	0	0	0	O43353	RIPK2	O43353	TRUE	10	-9.45366	9.45366	0	0.951391	1	-21.7508	-2.84353	-12.2972	0.591751	0.0165232	-21.7508	-2.84353	-12.2972	0.171163	0.0165232	-9.45366	9.45366	0	0.950601	1	2.84353	21.7508	12.2972	0.0805322	0.0165232	FALSE	FALSE	FALSE	FALSE	FALSE	FALSE
RLF	17.6805	17.3221	17.85	17.8642	17.8307	17.8573	17.4369	17.5769	0	0	0	0	Q13129	RLF	Q13129	TRUE	4	-9.20279	8.73636	-0.233216	0.948951	0.95427	-3.02335	14.9158	5.94622	0.864966	0.167449	-2.79014	15.149	6.17944	0.641968	0.153112	8.88115	26.8203	17.8507	0.0327635	0.00152974	2.70171	20.6409	11.6713	0.0804725	0.0164977	FALSE	FALSE	FALSE	TRUE	FALSE	TRUE
RNF213	20.1979	20.3856	19.4011	19.7656	19.5466	20.1853	0	0	20.7302	17.8738	0	19.0206	Q63HN8	RNF213	Q63HN8	TRUE	3	-14.0193	14.344	0.162371	0.950346	0.979852	-1.09685	27.2664	13.0848	0.789638	0.0664131	-1.25922	27.104	12.9224	0.475668	0.0692499	-6.64728	21.716	7.53435	0.884971	0.259352	-19.5697	8.79358	-5.38806	0.708725	0.411465	FALSE	FALSE	FALSE	FALSE	FALSE	FALSE
RNPS1	0	16.2405	0	0	15.5887	16.2943	0	0	0	0	0	0	Q15287	RNPS1	Q15287	TRUE	9	-16.8457	6.41744	-5.21414	0.844466	0.336164	-6.21807	17.0451	5.41351	0.900409	0.319008	-1.00393	22.2592	10.6277	0.473604	0.0686252	-1.00393	22.2592	10.6277	0.739614	0.0686252	-11.6316	11.6316	0	0.842923	1	FALSE	FALSE	FALSE	FALSE	FALSE	FALSE
RP9	20.6646	19.8268	20.0218	19.7394	20.0181	0	20.5315	20.8944	20.661	19.9853	20.2797	20.379	Q8TA86	RP9	Q8TA86	TRUE	1	-3.26004	17.0972	6.91858	0.660875	0.158063	-10.7032	9.65404	-0.524584	0.940635	0.909527	-17.6218	2.73546	-7.44317	0.613786	0.132114	-17.1408	3.21643	-6.96219	0.842681	0.155744	-9.69764	10.6596	0.480979	0.832429	0.917014	FALSE	FALSE	FALSE	FALSE	FALSE	FALSE
RPA1	21.1981	21.7728	20.9072	20.8256	21.0748	21.0142	20.9529	20.0687	20.6757	21.6537	21.5088	21.2283	P27694	RPA1	P27694	FALSE	0	-0.816009	1.45839	0.321191	0.906226	0.537901	-0.410212	1.86419	0.726987	0.870026	0.181508	-0.731403	1.543	0.405797	0.800388	0.439418	-1.62922	0.645179	-0.492021	0.904627	0.352392	-2.03502	0.239382	-0.897817	0.407522	0.1075	FALSE	FALSE	FALSE	FALSE	FALSE	FALSE
RPAP1	17.4494	0	0	0	16.8118	17.5119	16.3797	0	0	0	0	0	Q9BWH6	RPAP1	Q9BWH6	TRUE	8	-20.654	9.40452	-5.62477	0.877062	0.418221	-14.6727	15.3858	0.356558	0.942311	0.95827	-9.04796	21.0106	5.98132	0.786221	0.390503	-3.58806	26.4705	11.4412	0.814144	0.118851	-9.56939	20.4892	5.45989	0.717568	0.43149	FALSE	FALSE	FALSE	FALSE	FALSE	FALSE
RPL19	23.5386	24.1332	23.9545	23.7027	24.0005	24.2754	23.0414	23.0397	23.6875	23.6192	0	23.7779	P84098	RPL19	P84098	TRUE	1	-12.2329	11.9981	-0.1174	0.950509	0.982948	-11.4963	12.7347	0.619216	0.940662	0.910275	-11.3789	12.8521	0.736616	0.870735	0.893374	-3.92167	20.3093	8.19381	0.84523	0.15993	-4.65828	19.5727	7.45719	0.546451	0.196663	FALSE	FALSE	FALSE	FALSE	FALSE	FALSE
RPL24	22.331	23.295	23.0142	23.0721	21.603	21.5229	22.5437	21.2019	21.8137	22.7768	22.9124	23.0677	P83731	RPL24	P83731	FALSE	0	-0.629533	2.25774	0.814104	0.770791	0.233319	-0.41664	2.47063	1.027	0.853781	0.14162	-1.23074	1.65653	0.212893	0.85492	0.745736	-2.29664	0.590638	-0.852999	0.870416	0.213512	-2.50953	0.377745	-1.06589	0.445023	0.128867	FALSE	FALSE	FALSE	FALSE	FALSE	FALSE
RPL4	0	23.8731	23.9458	0	23.025	0	0	0	0	0	0	0	P36578	RPL4	P36578	TRUE	9	-8.66412	25.1934	8.26462	0.822557	0.297257	-0.989119	32.8684	15.9396	0.782468	0.061971	-9.25374	24.6037	7.675	0.764972	0.330991	-9.25374	24.6037	7.675	0.900905	0.330991	-16.9287	16.9287	0	0.842923	1	FALSE	FALSE	FALSE	FALSE	FALSE	FALSE
RPL6	24.7167	25.235	25.272	25.1459	24.4919	0	24.2257	23.4196	0	0	0	0	Q02878	RPL6	Q02878	TRUE	5	-9.02248	26.0798	8.52865	0.823894	0.29937	-8.35832	26.7439	9.19281	0.891423	0.265657	-16.887	18.2153	0.66416	0.874408	0.933493	-1.00521	34.097	16.5459	0.722296	0.0617093	-1.66937	33.4329	15.8818	0.320361	0.0708661	FALSE	FALSE	FALSE	FALSE	FALSE	FALSE
RPS2	24.5847	24.2561	24.0963	25.1285	24.2108	24.1767	23.809	23.4117	23.3956	24.6856	24.347	24.2627	P15880	RPS2	P15880	FALSE	0	-1.3289	0.942926	-0.192986	0.930171	0.709002	-0.362332	1.90949	0.77358	0.860923	0.157354	-0.169346	2.10248	0.966566	0.524757	0.0862138	-1.06232	1.20951	0.0735959	0.946437	0.886429	-2.02888	0.242942	-0.89297	0.410066	0.108801	FALSE	FALSE	FALSE	FALSE	FALSE	FALSE
RPS20	22.5075	22.4639	21.3718	21.8532	21.983	21.6711	22.4373	21.8145	19.9703	23.622	23.5033	22.8005	P60866	RPS20	P60866	FALSE	0	-1.367	1.92429	0.278646	0.930268	0.709929	-0.938576	2.35271	0.707069	0.905395	0.355575	-1.21722	2.07407	0.428423	0.828831	0.569536	-3.11848	0.172814	-1.47283	0.750213	0.0734695	-3.5469	-0.255609	-1.90125	0.147073	0.0281894	FALSE	FALSE	FALSE	FALSE	FALSE	FALSE
RPS3A	23.4601	23.0854	23.3095	22.524	23.2883	22.887	23.4873	22.9025	22.9351	24.4281	24.6832	23.37	P61247	RPS3A	P61247	FALSE	0	-0.854201	1.62468	0.385241	0.898318	0.498849	-1.06273	1.41615	0.176712	0.934451	0.753852	-1.44797	1.03091	-0.208529	0.850623	0.71168	-2.50013	-0.0212428	-1.26068	0.673029	0.0469409	-2.2916	0.187286	-1.05216	0.361421	0.0868461	FALSE	FALSE	FALSE	FALSE	FALSE	FALSE
RRBP1	20.3524	0	0	0	20.151	0	20.6332	19.4041	0	0	0	20.3685	Q9P2E9	RRBP1	Q9P2E9	TRUE	7	-20.5566	20.6909	0.0671482	0.951098	0.99427	-27.1854	14.0621	-6.56164	0.918755	0.489041	-27.2526	13.995	-6.62879	0.811569	0.484731	-20.6963	20.5513	-0.0725131	0.950391	0.993812	-14.0675	27.18	6.55627	0.740028	0.489387	FALSE	FALSE	FALSE	FALSE	FALSE	FALSE
RRS1	17.3819	0	0	17.1408	18.249	17.6528	16.4316	0	0	0	0	0	Q15050	RRS1	Q15050	TRUE	7	-24.1139	0.340088	-11.8869	0.279106	0.0553864	-11.9102	12.5437	0.316768	0.942183	0.954434	-0.0233201	24.4306	12.2037	0.402225	0.0503523	5.45388	29.9078	17.6809	0.296682	0.00976678	-6.74977	17.7042	5.4772	0.669044	0.336484	FALSE	FALSE	FALSE	FALSE	FALSE	FALSE
RSF1	0	0	18.3273	18.1819	17.8936	0	17.4088	0	0	0	0	0	Q96T23	RSF1	Q96T23	TRUE	8	-21.7575	9.92536	-5.91608	0.877364	0.419176	-15.5353	16.1476	0.306178	0.942567	0.965997	-9.61918	22.0637	6.22226	0.788083	0.396457	-3.81626	27.8666	12.0252	0.815021	0.119765	-10.0385	21.6444	5.80292	0.715984	0.427798	FALSE	FALSE	FALSE	FALSE	FALSE	FALSE
RUFY1	17.3948	20.3604	19.4369	19.277	0	19.982	20.4214	0	20.002	18.9008	18.3816	18.6554	Q96T51	RUFY1	Q96T51	TRUE	2	-8.46911	20.4245	5.97771	0.860844	0.372791	-8.85726	20.0364	5.58956	0.910887	0.403273	-14.835	14.0587	-0.388154	0.876094	0.952747	-20.0065	8.88717	-5.55965	0.9125	0.405693	-19.6183	9.27533	-5.17149	0.720322	0.438022	FALSE	FALSE	FALSE	FALSE	FALSE	FALSE
RUVBL1	22.2348	22.936	22.8701	22.352	22.109	22.2917	21.2303	20.9135	20.6128	21.6571	21.8495	21.9621	Q9Y265	RUVBL1	Q9Y265	FALSE	0	-0.645504	1.50431	0.429402	0.867005	0.388795	0.686526	2.83634	1.76143	0.392775	0.00495061	0.257124	2.40694	1.33203	0.210203	0.0207019	-0.646889	1.50292	0.428017	0.910398	0.390261	-1.97892	0.170894	-0.904013	0.367656	0.089353	FALSE	FALSE	FALSE	FALSE	FALSE	FALSE
S100A11	21.3386	22.2376	21.9244	21.6523	21.1725	20.981	21.0941	20.6259	21.4663	21.6462	21.9265	21.712	P31949	S100A11	P31949	FALSE	0	-0.594108	1.72393	0.56491	0.823028	0.297998	-0.387565	1.93047	0.771454	0.864377	0.165919	-0.952475	1.36556	0.206544	0.848486	0.695582	-1.65197	0.666071	-0.492948	0.9059	0.360225	-1.85851	0.459527	-0.699492	0.55634	0.204712	FALSE	FALSE	FALSE	FALSE	FALSE	FALSE
S100A6	20.0712	17.5393	18.7944	18.0728	20.3343	20.2325	20.2965	21.9029	21.2212	21.3599	21.6745	19.7603	P06703	S100A6	P06703	FALSE	0	-2.92988	1.44007	-0.744907	0.888897	0.459416	-4.52352	-0.153568	-2.33855	0.72636	0.038584	-3.77862	0.591339	-1.59364	0.615086	0.132995	-3.57001	0.799944	-1.38503	0.858424	0.184853	-1.97637	2.39358	0.208606	0.820286	0.833424	FALSE	FALSE	FALSE	FALSE	FALSE	FALSE
SAFB	19.9182	19.8716	20.3829	19.9991	20.6927	20.7782	20.107	18.7006	0	21.2752	20.2676	19.7019	Q15424	SAFB	Q15424	TRUE	1	-10.4138	9.54888	-0.432448	0.94719	0.923886	-2.85965	17.103	7.12168	0.853269	0.140584	-2.4272	17.5355	7.55413	0.595874	0.120731	-9.90625	10.0564	0.0750796	0.95015	0.986763	-17.4604	2.50228	-7.47905	0.437193	0.123983	FALSE	FALSE	FALSE	FALSE	FALSE	FALSE
SAFB2	0	17.4652	0	0	16.3411	17.6024	16.5411	0	0	0	20.6235	0	Q14151	SAFB2	Q14151	TRUE	7	-23.8285	12.843	-5.49273	0.901561	0.514122	-18.0277	18.6438	0.308041	0.942714	0.970441	-12.535	24.1365	5.80077	0.813091	0.491429	-13.8958	22.7757	4.43996	0.930999	0.596337	-19.6966	16.975	-1.36081	0.825829	0.870069	FALSE	FALSE	FALSE	FALSE	FALSE	FALSE
SAMD9	21.1338	21.0898	17.9436	20.7467	20.1658	20.0677	0	19.9003	19.5959	0	0	0	Q5K651	SAMD9	Q5K651	TRUE	4	-10.5065	9.96447	-0.270992	0.948905	0.953436	-3.34512	17.1258	6.89034	0.862694	0.16166	-3.07413	17.3968	7.16133	0.635001	0.147524	10.0913	30.5622	20.3267	0.0331512	0.00155066	2.92995	23.4009	13.1654	0.0825449	0.0174241	FALSE	FALSE	FALSE	TRUE	FALSE	TRUE
SAP130	18.4898	0	0	0	18.0715	18.17	18.7776	19.1133	19.0414	17.8761	17.6433	18.1011	Q9H0E3	SAP130	Q9H0E3	TRUE	3	-19.137	7.30245	-5.91725	0.844803	0.336844	-26.0339	0.405523	-12.8142	0.771467	0.0559716	-20.1166	6.32277	-6.89693	0.73499	0.267408	-19.0127	7.42673	-5.79297	0.90365	0.346561	-12.1157	14.3237	1.10396	0.823443	0.854003	FALSE	FALSE	FALSE	FALSE	FALSE	FALSE
SAP30BP	23.0443	22.4666	22.9018	22.9921	22.961	23.2007	23.3526	23.5649	23.7434	22.8399	22.8493	23.2476	Q9UHR5	SAP30BP	Q9UHR5	FALSE	0	-1.29068	0.796684	-0.246997	0.917252	0.604555	-1.79307	0.294293	-0.749388	0.852161	0.13838	-1.54607	0.54129	-0.502391	0.753216	0.303658	-0.971383	1.11598	0.0722982	0.946124	0.878642	-0.468992	1.61837	0.574689	0.598014	0.243641	FALSE	FALSE	FALSE	FALSE	FALSE	FALSE
SART1	19.2276	18.7667	0	19.4754	19.094	0	15.1342	0	19.222	0	16.8509	0	O43290	SART1	O43290	TRUE	5	-18.7483	18.3649	-0.191703	0.95045	0.981821	-17.3439	19.7693	1.21271	0.939768	0.885453	-17.1522	19.961	1.40441	0.868244	0.867529	-11.3171	25.7961	7.23951	0.911675	0.399524	-12.7215	24.3917	5.8351	0.741639	0.493984	FALSE	FALSE	FALSE	FALSE	FALSE	FALSE
SART3	20.135	0	0	0	19.9682	0	19.4313	19.4153	0	0	0	15.9548	Q15020	SART3	Q15020	TRUE	7	-19.2631	19.3743	0.0556092	0.951132	0.994934	-25.5559	13.0815	-6.23719	0.918252	0.482828	-25.6115	13.0259	-6.2928	0.810253	0.479047	-17.9809	20.6565	1.33779	0.946125	0.878684	-11.6881	26.9493	7.63058	0.70044	0.393927	FALSE	FALSE	FALSE	FALSE	FALSE	FALSE
SCML2	20.3463	0	0	18.7284	19.8272	0	19.5482	19.9245	18.5601	0	0	0	Q9UQR0	SCML2	Q9UQR0	TRUE	6	-20.3954	8.25595	-6.06973	0.856358	0.361969	-26.8878	1.76355	-12.5621	0.805932	0.0784667	-20.8181	7.83328	-6.4924	0.765042	0.331163	-1.47383	27.1775	12.8518	0.749026	0.072901	5.01857	33.6699	19.3442	0.0730605	0.0137965	FALSE	FALSE	FALSE	FALSE	FALSE	FALSE
SDCBP	0	19.1397	0	19.376	18.2692	0	19.7671	18.5503	0	17.233	0	19.9556	O00560	SDCBP	O00560	TRUE	5	-25.521	13.184	-6.1685	0.895946	0.488265	-25.7451	12.9599	-6.39256	0.917443	0.473063	-19.5766	19.1284	-0.224057	0.878372	0.979627	-19.2003	19.5047	0.152204	0.950129	0.986159	-18.9762	19.7288	0.376261	0.838763	0.965795	FALSE	FALSE	FALSE	FALSE	FALSE	FALSE
SEC61B	0	21.5967	21.4333	18.9055	19.321	19.4964	20.4437	19.6817	17.8995	20.8544	20.3474	21.9098	P60468	SEC61B	P60468	TRUE	1	-15.9808	6.18558	-4.89763	0.847662	0.342723	-16.0815	6.08494	-4.99828	0.902467	0.333413	-11.1839	10.9826	-0.100642	0.878736	0.98402	-12.8795	9.28697	-1.79625	0.93881	0.721737	-12.7788	9.38761	-1.69561	0.803654	0.736628	FALSE	FALSE	FALSE	FALSE	FALSE	FALSE
SEPTIN2	0	0	0	0	0	0	22.6853	21.7177	0	0	0	0	Q15019	SEPTIN2	Q15019	TRUE	10	-11.3536	11.3536	0	0.951391	1	-26.1546	-3.44745	-14.801	0.59037	0.0163516	-26.1546	-3.44745	-14.801	0.170337	0.0163516	-11.3536	11.3536	0	0.950601	1	3.44745	26.1546	14.801	0.0801263	0.0163516	FALSE	FALSE	FALSE	FALSE	FALSE	FALSE
SEPTIN9	20.3636	19.3337	19.5709	20.4166	20.0253	19.7974	20.4424	20.1467	20.6514	21.4565	20.3701	20.4917	Q9UHD8	SEPTIN9	Q9UHD8	FALSE	0	-1.57342	0.926039	-0.323689	0.912118	0.571473	-1.90715	0.592307	-0.65742	0.891049	0.26373	-1.58346	0.915996	-0.333731	0.827053	0.559828	-1.94274	0.556718	-0.693009	0.879558	0.24058	-1.609	0.89045	-0.359278	0.753787	0.530829	FALSE	FALSE	FALSE	FALSE	FALSE	FALSE
SERBP1	23.2638	22.4394	22.8842	22.9539	22.8759	21.541	23.0631	23.1388	23.013	23.4678	23.437	22.5563	Q8NC51	SERBP1	Q8NC51	FALSE	0	-0.92419	1.73526	0.405535	0.90002	0.506741	-1.53888	1.12057	-0.209154	0.93334	0.729558	-1.94441	0.715036	-0.614688	0.761313	0.322107	-2.02646	0.632987	-0.696737	0.886606	0.265489	-1.41177	1.24768	-0.0820491	0.82895	0.891799	FALSE	FALSE	FALSE	FALSE	FALSE	FALSE
SET	19.9359	18.6332	0	0	0	0	0	0	0	0	19.8417	0	Q01105	SET	Q01105	TRUE	9	-1.27672	26.9894	12.8563	0.350152	0.069641	-1.27672	26.9894	12.8563	0.794414	0.069641	-14.1331	14.1331	0	0.880043	1	-20.747	7.51917	-6.61389	0.898158	0.316507	-20.747	7.51917	-6.61389	0.656257	0.316507	FALSE	FALSE	FALSE	FALSE	FALSE	FALSE
SF3A1	19.0414	21.3864	18.9939	17.9468	19.4573	18.5122	20.3633	20.1491	20.2483	21.2901	21.2226	21.8443	Q15459	SF3A1	Q15459	FALSE	0	-0.546534	2.88349	1.16848	0.65907	0.15719	-2.16137	1.26866	-0.446354	0.924565	0.569645	-3.32985	0.100181	-1.61483	0.450222	0.0619677	-4.52859	-1.09856	-2.81357	0.152114	0.00491866	-2.91375	0.516276	-1.19874	0.473822	0.147879	FALSE	FALSE	FALSE	FALSE	FALSE	FALSE
SF3B2	22.3524	19.6603	20.4755	21.8721	21.8885	21.2658	23.1903	22.4746	22.1467	23.1419	22.1474	21.274	Q13435	SF3B2	Q13435	FALSE	0	-2.69399	1.00184	-0.846074	0.839513	0.326492	-3.6224	0.0734298	-1.77449	0.775122	0.0578653	-2.77633	0.919504	-0.928413	0.743903	0.284294	-2.36019	1.33564	-0.512276	0.927053	0.545281	-1.43178	2.26405	0.416137	0.778977	0.621916	FALSE	FALSE	FALSE	FALSE	FALSE	FALSE
SFPQ	22.1222	0	22.2641	22.0118	23.2512	0	22.3775	22.0914	22.5579	0	0	0	P23246	SFPQ	P23246	TRUE	5	-16.4711	15.8867	-0.292201	0.949721	0.968224	-23.7257	8.63202	-7.54684	0.900257	0.317981	-23.4335	8.92422	-7.25464	0.766986	0.336033	-1.09122	31.2665	15.0876	0.728485	0.0640519	6.16342	38.5212	22.3423	0.0680174	0.0123467	FALSE	FALSE	FALSE	FALSE	FALSE	FALSE
SH3BP2	0	0	0	18.1404	0	18.2522	0	0	0	0	0	0	P78314	SH3BP2	P78314	TRUE	10	-21.4462	-2.8155	-12.1309	0.0438884	0.0164356	-9.31535	9.31535	0	0.943668	1	2.8155	21.4462	12.1309	0.170743	0.0164356	2.8155	21.4462	12.1309	0.42895	0.0164356	-9.31535	9.31535	0	0.842923	1	TRUE	FALSE	FALSE	FALSE	FALSE	TRUE
SH3D19	18.8869	0	0	0	18.5554	19.536	19.2487	19.4503	19.88	18.9728	0	0	Q5HYK7	SH3D19	Q5HYK7	TRUE	5	-23.1659	10.3629	-6.40148	0.874139	0.409201	-29.9951	3.53365	-13.2307	0.833287	0.107608	-23.5936	9.93512	-6.82926	0.7828	0.379903	-10.3915	23.1372	6.37284	0.913221	0.411217	-3.56228	29.9665	13.2021	0.409024	0.108266	FALSE	FALSE	FALSE	FALSE	FALSE	FALSE
SH3GL1	18.9474	18.1402	19.9331	0	19.6833	19.9116	19.3397	19.0411	18.6576	19.0425	19.4013	0	Q99961	SH3GL1	Q99961	TRUE	2	-8.30125	19.9184	5.80857	0.861773	0.375117	-14.1157	14.1039	-0.00591616	0.943645	0.999262	-19.9243	8.29533	-5.81449	0.781053	0.374653	-13.7261	14.4935	0.383724	0.948932	0.952172	-7.91161	20.308	6.19821	0.674429	0.345438	FALSE	FALSE	FALSE	FALSE	FALSE	FALSE
SH3PXD2B	19.8985	19.5665	0	20.2429	19.6335	0	19.9886	19.9331	20.7965	18.6805	18.7798	19.583	A1X283	SH3PXD2B	A1X283	TRUE	2	-14.4691	14.1949	-0.137122	0.95052	0.983163	-21.4164	7.24757	-7.08441	0.896098	0.29163	-21.2793	7.38469	-6.94729	0.75175	0.300484	-20.0543	8.60968	-5.72231	0.910225	0.389034	-13.107	15.557	1.22498	0.822932	0.850618	FALSE	FALSE	FALSE	FALSE	FALSE	FALSE
SHC1	19.6778	19.7176	19.4109	19.9904	19.4949	19.901	20.0843	0	0	19.7	19.234	20.0123	P29353	SHC1	P29353	TRUE	2	-10.4747	10.088	-0.193349	0.94965	0.966914	2.62597	23.1887	12.9073	0.621652	0.0195071	2.81932	23.382	13.1007	0.186854	0.0182085	-10.1347	10.428	0.146656	0.949739	0.974901	-23.2354	-2.67266	-12.954	0.0927644	0.019185	FALSE	FALSE	FALSE	FALSE	FALSE	FALSE
SIN3B	21.5432	21.2048	0	21.1251	21.5884	21.1231	21.3588	20.9185	21.6139	20.7402	21.0079	21.0452	O75182	SIN3B	O75182	TRUE	1	-17.9643	3.90518	-7.02956	0.700172	0.179312	-17.9825	3.887	-7.04774	0.868925	0.178302	-10.9529	10.9166	-0.0181805	0.879805	0.997074	-10.587	11.2825	0.34777	0.948638	0.944081	-10.5688	11.3007	0.36595	0.835627	0.941164	FALSE	FALSE	FALSE	FALSE	FALSE	FALSE
SIPA1L2	20.337	20.6979	20.4166	20.5927	0	0	20.5949	17.9743	19.0739	18.4563	19.6399	21.3596	Q9P2F8	SIPA1L2	Q9P2F8	TRUE	2	2.94699	24.2922	13.6196	0.0499428	0.0180817	-9.40313	11.9421	1.26947	0.936166	0.79345	-23.0227	-1.67752	-12.3501	0.270561	0.0279971	-23.627	-2.28178	-12.9544	0.511433	0.0227275	-11.2769	10.0683	-0.604261	0.83019	0.900661	TRUE	FALSE	FALSE	FALSE	FALSE	TRUE
SKA3	0	0	0	0	0	0	17.3255	17.2854	0	0	0	17.0777	Q8IX90	SKA3	Q8IX90	TRUE	9	-12.4171	12.4171	0	0.951391	1	-23.9541	0.880171	-11.537	0.787219	0.0648625	-23.9541	0.880171	-11.537	0.460711	0.0648625	-18.1097	6.72456	-5.69258	0.899962	0.325901	-6.57275	18.2615	5.84439	0.654494	0.313884	FALSE	FALSE	FALSE	FALSE	FALSE	FALSE
SLAIN2	0	0	0	0	0	0	19.7049	19.3544	18.973	19.0225	18.6575	18.2267	Q9P270	SLAIN2	Q9P270	TRUE	6	-1.07766	1.07766	0	0.951391	1	-20.4217	-18.2664	-19.3441	6.76337e-15	2.3573e-11	-20.4217	-18.2664	-19.3441	6.67838e-15	2.3573e-11	-19.7132	-17.5579	-18.6356	8.75964e-15	3.27133e-11	-0.36917	1.78615	0.708491	0.510725	0.170628	FALSE	TRUE	TRUE	TRUE	FALSE	TRUE
SLC3A2	0	0	0	23.5938	22.7548	0	0	0	0	0	0	0	P08195	SLC3A2	P08195	TRUE	10	-27.2944	-3.60463	-15.4495	0.043787	0.0163115	-11.8449	11.8449	0	0.943668	1	3.60463	27.2944	15.4495	0.170142	0.0163115	3.60463	27.2944	15.4495	0.42699	0.0163115	-11.8449	11.8449	0	0.842923	1	TRUE	FALSE	FALSE	FALSE	FALSE	TRUE
SLTM	18.3917	17.4278	0	0	18.1923	18.5418	17.6961	18.5021	18.1737	0	0	16.1572	Q9NWH9	SLTM	Q9NWH9	TRUE	4	-15.7826	15.1729	-0.304868	0.949565	0.965347	-21.6619	9.29362	-6.18415	0.909314	0.388713	-21.3571	9.59848	-5.87928	0.792625	0.411558	-8.61881	22.3367	6.85896	0.902767	0.341427	-2.73953	28.216	12.7382	0.381788	0.0953433	FALSE	FALSE	FALSE	FALSE	FALSE	FALSE
SMAP	22.1466	21.6574	22.2498	22.2447	22.0641	22.498	21.6907	21.5345	21.6475	21.2029	21.0193	21.3876	O00193	SMAP	O00193	FALSE	0	-1.29021	0.78825	-0.25098	0.916177	0.597295	-0.645501	1.43296	0.393729	0.911866	0.412728	-0.394521	1.68394	0.644709	0.683633	0.193477	0.0264421	2.1049	1.06567	0.667093	0.0455257	-0.618267	1.46019	0.420963	0.694733	0.382475	FALSE	FALSE	FALSE	FALSE	FALSE	FALSE
SMARCA1	0	21.2492	0	0	18.8539	0	0	18.4146	18.493	0	0	22.037	P28370	SMARCA1	P28370	TRUE	7	-19.801	21.3979	0.798424	0.947666	0.931884	-25.819	15.38	-5.21948	0.925211	0.579708	-26.6174	14.5816	-6.0179	0.820148	0.524353	-21.6605	19.5384	-1.06103	0.947344	0.909579	-15.6426	25.5563	4.95687	0.773091	0.598602	FALSE	FALSE	FALSE	FALSE	FALSE	FALSE
SMARCA5	21.618	0	23.2179	0	21.6286	21.8008	21.6044	20.238	21.6376	22.3459	22.4459	0	O60264	SMARCA5	O60264	TRUE	3	-19.14	20.0777	0.468837	0.949156	0.957944	-25.8235	13.3942	-6.21468	0.918885	0.490671	-26.2924	12.9253	-6.68352	0.80555	0.459518	-20.063	19.1547	-0.454138	0.949187	0.959261	-13.3795	25.8382	6.22938	0.740129	0.489675	FALSE	FALSE	FALSE	FALSE	FALSE	FALSE
SMC4	0	19.6303	17.7393	0	17.3729	17.6362	19.8738	19.3978	19.8919	20.3094	19.0458	20.1359	Q9NTJ3	SMC4	Q9NTJ3	TRUE	2	-12.3287	13.9023	0.786835	0.945386	0.894779	-20.3801	5.85086	-7.26463	0.886334	0.241075	-21.167	5.06403	-8.05147	0.687316	0.197735	-21.2762	4.95478	-8.16071	0.861809	0.192278	-13.2247	13.0062	-0.109246	0.841167	0.985342	FALSE	FALSE	FALSE	FALSE	FALSE	FALSE
SNCB	0	0	0	0	0	0	17.8555	18.5184	0	19.0109	0	0	Q16143	SNCB	Q16143	TRUE	9	-13.4338	13.4338	0	0.951391	1	-25.5585	1.30922	-12.1246	0.79698	0.071474	-25.5585	1.30922	-12.1246	0.482852	0.071474	-19.7708	7.09688	-6.33696	0.897437	0.312873	-7.64618	19.2215	5.78766	0.679585	0.354335	FALSE	FALSE	FALSE	FALSE	FALSE	FALSE
SND1	23.6556	24.7215	24.6417	24.3722	23.6243	23.4941	22.9931	22.4911	22.3725	23.1995	23.0509	23.5212	Q7KZF4	SND1	Q7KZF4	FALSE	0	-0.720126	1.73902	0.509447	0.860597	0.37218	0.491159	2.95031	1.72073	0.54194	0.0115486	-0.0182881	2.44086	1.21129	0.413277	0.052813	-0.656589	1.80256	0.572984	0.898535	0.318432	-1.86787	0.591273	-0.638301	0.62124	0.269627	FALSE	FALSE	FALSE	FALSE	FALSE	FALSE
SNRPA1	21.6426	22.3738	18.4962	21.9178	21.4989	21.3934	20.7301	17.0935	20.3668	0	21.3744	21.1825	P09661	SNRPA1	P09661	TRUE	1	-11.9374	10.4058	-0.765844	0.944414	0.879891	-9.73087	12.6123	1.44074	0.935449	0.776577	-8.96502	13.3782	2.20658	0.844199	0.664835	-3.75386	18.5893	7.41774	0.849212	0.166848	-5.96044	16.3828	5.21116	0.657238	0.317979	FALSE	FALSE	FALSE	FALSE	FALSE	FALSE
SNRPD2	0	24.2122	24.1198	0	22.7562	22.8626	22.803	21.81	22.1489	23.3993	22.8308	24.0814	P62316	SNRPD2	P62316	TRUE	2	-16.058	17.8669	0.904421	0.946122	0.906416	-23.1057	10.8192	-6.14328	0.913848	0.432853	-24.0101	9.91474	-7.0477	0.779783	0.370904	-25.1933	8.73154	-8.23089	0.894772	0.300014	-18.1456	15.7792	-1.1832	0.826953	0.877806	FALSE	FALSE	FALSE	FALSE	FALSE	FALSE
SNRPGP15	0	0	0	0	0	0	21.0116	20.543	0	0	21.6453	0	A8MWD9	SNRPGP15	A8MWD9	TRUE	9	-15.3088	15.3088	0	0.951391	1	-29.1603	1.45727	-13.8515	0.796168	0.070886	-29.1603	1.45727	-13.8515	0.480977	0.070886	-22.5239	8.0937	-7.21509	0.897517	0.313272	-8.67237	21.9452	6.63643	0.677962	0.3515	FALSE	FALSE	FALSE	FALSE	FALSE	FALSE
SNX1	19.6815	0	0	20.3485	21.3599	20.7585	20.4428	20.4632	20.8969	20.008	19.6412	0	Q13596	SNX1	Q13596	TRUE	3	-28.5281	0.00444591	-14.2618	0.248526	0.0500574	-28.3067	0.225816	-14.0405	0.765341	0.0529989	-14.0449	14.4876	0.22137	0.877793	0.972697	-6.66034	21.8722	7.60593	0.884549	0.257803	-6.88171	21.6508	7.38457	0.622314	0.270918	FALSE	FALSE	FALSE	FALSE	FALSE	FALSE
SNX2	0	18.6709	18.7565	17.8873	0	0	0	0	16.4144	0	0	0	O60749	SNX2	O60749	TRUE	8	-9.12398	22.1507	6.51336	0.859617	0.369766	-8.63301	22.6417	7.00433	0.902895	0.336522	-15.1464	16.1283	0.490969	0.875404	0.944795	-9.6749	21.5998	5.96243	0.913045	0.409855	-10.1659	21.1088	5.47146	0.72444	0.448066	FALSE	FALSE	FALSE	FALSE	FALSE	FALSE
SNX4	18.3718	0	0	0	18.3869	0	19.7262	20.1117	19.805	19.2523	0	19.0754	O95219	SNX4	O95219	TRUE	5	-16.4773	16.4672	-0.00505419	0.951364	0.99946	-30.2293	2.71516	-13.7571	0.819555	0.0912578	-30.2242	2.72022	-13.752	0.53742	0.0913588	-23.1191	9.82532	-6.64691	0.909539	0.384219	-9.36713	23.5773	7.1051	0.679276	0.353792	FALSE	FALSE	FALSE	FALSE	FALSE	FALSE
SON	0	0	0	0	16.5814	19.1243	19.0398	19.2103	0	18.0514	19.4618	19.9319	P18583	SON	P18583	TRUE	5	-25.3331	1.52934	-11.9019	0.383516	0.0758752	-26.1812	0.681181	-12.75	0.779469	0.0602438	-14.2794	12.5831	-0.848157	0.870347	0.889285	-20.6777	6.18473	-7.24648	0.883088	0.252559	-19.8295	7.03289	-6.39832	0.650734	0.308394	FALSE	FALSE	FALSE	FALSE	FALSE	FALSE
SP100	18.7031	18.4249	19.0751	18.9434	0	19.2901	0	18.8901	18.4851	0	0	19.741	P23497	SP100	P23497	TRUE	4	-10.9626	22.9423	5.98989	0.884672	0.443769	-10.6764	23.2285	6.27601	0.912902	0.423076	-16.6663	17.2386	0.286119	0.877592	0.970304	-10.7883	23.1166	6.16415	0.915694	0.431086	-11.0744	22.8305	5.87803	0.726032	0.452042	FALSE	FALSE	FALSE	FALSE	FALSE	FALSE
SPEN	0	17.3391	0	0	0	0	0	19.4974	18.6509	0	0	0	Q96T58	SPEN	Q96T58	TRUE	9	-7.3861	18.9455	5.77972	0.849091	0.345739	-20.1022	6.22941	-6.9364	0.890918	0.263057	-25.8819	0.449696	-12.7161	0.429685	0.0566918	-13.1658	13.1658	0	0.950601	1	-0.449696	25.8819	12.7161	0.276249	0.0566918	FALSE	FALSE	FALSE	FALSE	FALSE	FALSE
SPTAN1	16.256	0	0	0	17.4453	0	17.1688	18.0322	0	22.3931	21.2714	19.8446	Q13813	SPTAN1	Q13813	TRUE	5	-15.5644	14.7716	-0.396436	0.948938	0.954032	-21.483	8.85301	-6.31498	0.907159	0.369974	-21.0865	9.24945	-5.91855	0.789001	0.399444	-30.5226	-0.186584	-15.3546	0.676447	0.0477852	-24.604	5.73196	-9.43603	0.540949	0.192354	FALSE	FALSE	FALSE	FALSE	FALSE	FALSE
SPTBN1	0	0	0	0	0	0	0	19.6767	21.151	0	0	0	Q01082	SPTBN1	Q01082	TRUE	10	-10.4591	10.4591	0	0.951391	1	-24.0684	-3.1501	-13.6092	0.591517	0.0164993	-24.0684	-3.1501	-13.6092	0.171049	0.0164993	-10.4591	10.4591	0	0.950601	1	3.1501	24.0684	13.6092	0.0804762	0.0164993	FALSE	FALSE	FALSE	FALSE	FALSE	FALSE
SQSTM1	23.9014	0	0	23.6483	0	23.3277	23.5637	23.8207	24.8122	24.509	24.3414	24.4659	Q13501	SQSTM1	Q13501	TRUE	3	-24.7921	9.40901	-7.69153	0.843698	0.334626	-33.1989	1.00216	-16.0984	0.782536	0.0620108	-25.5074	8.69369	-8.40686	0.748732	0.294102	-25.8806	8.32044	-8.7801	0.888908	0.274545	-17.4738	16.7273	-0.373249	0.838238	0.961604	FALSE	FALSE	FALSE	FALSE	FALSE	FALSE
SRP72	17.4711	0	0	0	0	0	18.5566	18.9955	19.2819	18.7256	18.8604	18.5048	O76094	SRP72	O76094	TRUE	5	-3.13155	14.7789	5.82369	0.69256	0.174827	-22.0762	-4.16574	-13.121	0.504514	0.00912083	-27.8999	-9.98943	-18.9447	0.00858008	0.00102879	-27.6522	-9.74168	-18.6969	0.0239026	0.00112179	-8.70749	9.203	0.247753	0.836939	0.951346	FALSE	FALSE	TRUE	TRUE	FALSE	TRUE
SRPK1	0	19.8499	16.3187	0	0	17.9007	17.6355	0	0	0	0	0	Q96SB4	SRPK1	Q96SB4	TRUE	8	-9.78045	21.959	6.08928	0.873412	0.40702	-9.69205	22.0474	6.17769	0.910596	0.400516	-15.7813	15.9581	0.0884063	0.879244	0.990196	-9.90283	21.8366	5.9669	0.913852	0.416144	-9.99124	21.7482	5.8785	0.713817	0.422824	FALSE	FALSE	FALSE	FALSE	FALSE	FALSE
SRRM2	16.9221	0	0	20.8247	20.2387	0	17.4639	0	19.4125	0	0	0	Q9UQ35	SRRM2	Q9UQ35	TRUE	7	-24.582	8.48779	-8.04713	0.823457	0.298677	-23.1864	9.88345	-6.65147	0.90897	0.385634	-15.1393	17.9306	1.39566	0.866743	0.852453	-2.8471	30.2227	13.6878	0.784827	0.0937075	-4.24276	28.8271	12.2922	0.441419	0.126588	FALSE	FALSE	FALSE	FALSE	FALSE	FALSE
SRSF11	0	0	21.3084	0	21.4008	21.7995	0	21.2296	0	19.2671	0	21.0945	Q05519	SRSF11	Q05519	TRUE	6	-28.8081	14.2135	-7.29731	0.889454	0.461565	-21.4845	21.537	0.026249	0.9436	0.997852	-14.1872	28.8343	7.32356	0.805671	0.460006	-20.5645	22.457	0.946247	0.947845	0.922725	-27.8881	15.1335	-6.37731	0.749826	0.51837	FALSE	FALSE	FALSE	FALSE	FALSE	FALSE
STAT1	22.4979	21.8848	22.3006	22.2529	22.4758	22.4892	22.4626	22.7741	22.6128	22.0972	21.9878	22.0589	P42224	STAT1	P42224	FALSE	0	-1.20043	0.843978	-0.178226	0.929409	0.701787	-1.41093	0.633476	-0.388728	0.911695	0.411049	-1.23271	0.811701	-0.210502	0.84227	0.651641	-0.664176	1.38023	0.358028	0.917619	0.447623	-0.453673	1.59073	0.56853	0.593801	0.23929	FALSE	FALSE	FALSE	FALSE	FALSE	FALSE
STAT3	19.8087	19.1937	18.9458	19.601	19.7077	19.6938	21.0432	20.1436	20.1805	20.4984	19.8499	19.2332	P40763	STAT3	P40763	FALSE	0	-1.6174	0.914551	-0.351427	0.90749	0.544749	-2.40569	0.126269	-1.13971	0.797796	0.0720714	-2.05426	0.477696	-0.788282	0.682319	0.191989	-1.45901	1.07294	-0.193034	0.939645	0.737468	-0.67073	1.86123	0.595248	0.65481	0.314353	FALSE	FALSE	FALSE	FALSE	FALSE	FALSE
STAT6	0	17.1227	16.8641	0	17.7762	0	0	17.1018	0	0	0	16.5967	P42226	STAT6	P42226	TRUE	7	-12.0598	22.8669	5.40353	0.898729	0.50073	-11.835	23.0917	5.62833	0.918313	0.483572	-17.2386	17.6882	0.224797	0.878182	0.977349	-17.0702	17.8565	0.393168	0.949227	0.960396	-17.295	17.6317	0.168371	0.840887	0.983033	FALSE	FALSE	FALSE	FALSE	FALSE	FALSE
STBD1	18.8566	19.3513	19.1639	19.8182	19.6012	19.1298	18.5342	18.4877	18.7878	17.8515	18.1753	18.2264	O95210	STBD1	O95210	FALSE	0	-1.45598	0.670998	-0.39249	0.879011	0.424468	-0.542787	1.58419	0.520702	0.896816	0.295945	-0.150296	1.97668	0.913192	0.518569	0.0838267	0.368565	2.49554	1.43205	0.387221	0.013986	-0.544627	1.58235	0.518862	0.643023	0.297549	FALSE	FALSE	FALSE	FALSE	FALSE	FALSE
STEEP1	21.0245	20.4005	18.9396	20.755	20.2362	0	21.2853	21.6249	20.8331	21.0798	20.5772	20.5639	Q9H5V9	STEEP1	Q9H5V9	TRUE	1	-4.07647	16.9921	6.45779	0.729009	0.198307	-11.6605	9.408	-1.12626	0.937009	0.813869	-18.1183	2.95021	-7.58405	0.6215	0.137456	-17.6108	3.45768	-7.07658	0.846711	0.162448	-10.0268	11.0417	0.507469	0.832212	0.915406	FALSE	FALSE	FALSE	FALSE	FALSE	FALSE
STIP1	20.8355	21.401	0	0	21.2633	0	22.6261	20.8333	20.1544	23.0592	23.0926	21.6126	P31948	STIP1	P31948	TRUE	3	-8.36007	22.3422	6.99104	0.840794	0.328939	-22.4769	8.22534	-7.12577	0.900587	0.320215	-29.4679	1.2343	-14.1168	0.46868	0.0671605	-30.8515	-0.149244	-15.5004	0.678256	0.0482414	-16.7347	13.9676	-1.38355	0.821709	0.842604	FALSE	FALSE	FALSE	FALSE	FALSE	FALSE
STMN1	20.7884	18.9445	20.1729	19.8306	20.1056	20.0495	21.7646	21.8768	22.8779	21.8228	22.145	20.8707	P16949	STMN1	P16949	FALSE	0	-1.53307	1.47974	-0.0266631	0.949756	0.968859	-3.71094	-0.698135	-2.20454	0.505539	0.00917733	-3.68428	-0.671472	-2.17787	0.125964	0.00977757	-3.12402	-0.111213	-1.61762	0.630804	0.0380826	-0.946144	2.06666	0.560259	0.713023	0.421022	FALSE	FALSE	FALSE	FALSE	FALSE	FALSE
SUB1	0	19.3255	18.2502	19.085	19.4464	20.0188	20.5757	19.96	20.7792	22.2736	22.2697	0	P53999	SUB1	P53999	TRUE	2	-21.8771	7.89413	-6.99147	0.833139	0.314845	-22.7986	6.97254	-7.91305	0.890133	0.259089	-15.8072	13.964	-0.921586	0.870552	0.891438	-10.2166	19.5545	4.66895	0.922565	0.495043	-9.29506	20.4761	5.59054	0.711076	0.416652	FALSE	FALSE	FALSE	FALSE	FALSE	FALSE
SUGP1	0	19.2585	20.3041	0	19.6095	19.8772	0	20.2839	20.1468	19.5167	19.4492	20.0488	Q8IWZ8	SUGP1	Q8IWZ8	TRUE	3	-17.5729	17.6235	0.0253127	0.951262	0.997469	-17.8875	17.3088	-0.28934	0.942734	0.971072	-17.9128	17.2835	-0.314652	0.877443	0.968542	-24.1075	11.0889	-6.50933	0.914768	0.42347	-23.7929	11.4035	-6.19467	0.723371	0.445427	FALSE	FALSE	FALSE	FALSE	FALSE	FALSE
SURF6	19.495	19.2193	19.8629	19.8012	19.2879	19.571	0	0	0	0	0	0	O75683	SURF6	O75683	TRUE	6	-1.06021	1.00492	-0.0276447	0.948875	0.952914	18.4932	20.5583	19.5257	6.76337e-15	1.49162e-11	18.5208	20.586	19.5534	6.67838e-15	1.47319e-11	18.5208	20.586	19.5534	8.75964e-15	1.47319e-11	-1.03257	1.03257	0	0.842923	1	FALSE	TRUE	TRUE	TRUE	FALSE	TRUE
SYMPK	0	0	20.3178	20.0518	0	0	0	17.2744	16.7454	0	0	0	Q92797	SYMPK	Q92797	TRUE	8	-16.8601	17.0374	0.0886606	0.950919	0.990794	-21.5161	12.3814	-4.56734	0.923686	0.556325	-21.6048	12.2928	-4.656	0.824986	0.548846	-10.2648	23.6327	6.68393	0.911008	0.394643	-5.60883	28.2887	11.3399	0.500521	0.16396	FALSE	FALSE	FALSE	FALSE	FALSE	FALSE
SYNM	0	0	0	0	0	0	18.8298	18.5849	16.8857	0	0	18.0989	O15061	SYNM	O15061	TRUE	8	-9.31284	9.31284	0	0.951391	1	-27.413	-8.78728	-18.1001	0.202556	0.00177805	-27.413	-8.78728	-18.1001	0.0184108	0.00177805	-15.3458	3.27988	-6.03296	0.854251	0.176322	2.75432	21.38	12.0672	0.0812387	0.0168296	FALSE	FALSE	TRUE	FALSE	FALSE	TRUE
SYNPO2L	17.9432	0	18.2458	18.0693	18.5966	18.2886	18.1712	18.3653	0	17.6609	0	0	Q9H987	SYNPO2L	Q9H987	TRUE	4	-22.1699	9.65957	-6.25516	0.869667	0.39616	-16.0306	15.7989	-0.11584	0.943259	0.987191	-9.77541	22.0541	6.13932	0.790565	0.404607	-3.48355	28.3459	12.4312	0.805887	0.110762	-9.62287	22.2066	6.29186	0.700237	0.39351	FALSE	FALSE	FALSE	FALSE	FALSE	FALSE
SYVN1	0	0	0	0	0	0	18.1282	18.6393	0	18.0594	18.0099	17.0917	Q86TM6	SYVN1	Q86TM6	TRUE	7	-9.42512	9.42512	0	0.951391	1	-21.6809	-2.8307	-12.2558	0.592056	0.0165504	-21.6809	-2.8307	-12.2558	0.171292	0.0165504	-27.1454	-8.29521	-17.7203	0.052611	0.00218812	-14.8896	3.96061	-5.46451	0.575451	0.221483	FALSE	FALSE	FALSE	FALSE	FALSE	FALSE
TACC3	0	0	0	0	0	0	17.3847	16.8734	17.5171	0	0	0	Q9Y6A5	TACC3	Q9Y6A5	TRUE	9	-1.01173	1.01173	0	0.951391	1	-18.2701	-16.2467	-17.2584	6.76337e-15	3.68758e-11	-18.2701	-16.2467	-17.2584	6.67838e-15	3.68758e-11	-1.01173	1.01173	0	0.950601	1	16.2467	18.2701	17.2584	7.24958e-15	3.68758e-11	FALSE	TRUE	TRUE	FALSE	TRUE	TRUE
TAF1	19.8258	19.1591	19.9108	19.7081	19.8676	19.953	20.4014	21.0288	20.5447	20.023	20.4974	19.8208	P21675	TAF1	P21675	FALSE	0	-1.33144	0.909456	-0.21099	0.926936	0.679417	-2.14684	0.0940471	-1.0264	0.792077	0.0680329	-1.93585	0.305037	-0.815409	0.616187	0.133747	-1.3913	0.84959	-0.270856	0.931043	0.596946	-0.575894	1.665	0.544552	0.644289	0.299293	FALSE	FALSE	FALSE	FALSE	FALSE	FALSE
TAF7	19.9799	20.0419	20.1241	20.3915	20.1421	20.2499	21.1598	20.6016	21.1138	20.6129	20.3504	20.5031	Q15545	TAF7	Q15545	FALSE	0	-1.23143	0.806364	-0.212532	0.923095	0.647494	-1.92865	0.109138	-0.909758	0.800404	0.0740338	-1.71612	0.32167	-0.697225	0.644943	0.155586	-1.2465	0.79129	-0.227606	0.932972	0.624676	-0.549276	1.48852	0.469619	0.660828	0.32345	FALSE	FALSE	FALSE	FALSE	FALSE	FALSE
TAGLN2	24.2209	23.6471	23.8151	23.6029	23.9431	24.1312	24.6036	24.7964	24.4415	24.6479	24.7123	24.1145	P37802	TAGLN2	P37802	FALSE	0	-1.0776	1.08155	0.00197651	0.951227	0.996778	-1.79906	0.360082	-0.719491	0.86419	0.165437	-1.80104	0.358105	-0.721468	0.655036	0.164401	-1.67877	0.480379	-0.599194	0.879437	0.240189	-0.9573	1.20185	0.122274	0.815404	0.803079	FALSE	FALSE	FALSE	FALSE	FALSE	FALSE
TANC1	20.4014	20.2163	19.3194	20.2266	20.2984	20.1606	20.7862	20.8146	20.7452	19.7679	19.2689	20.1654	Q9C0D5	TANC1	Q9C0D5	FALSE	0	-1.4139	0.914882	-0.249507	0.921962	0.638669	-1.96733	0.361449	-0.80294	0.858956	0.152769	-1.71782	0.610956	-0.553433	0.755824	0.309426	-0.669935	1.65884	0.494454	0.906015	0.360944	-0.116502	2.21228	1.04789	0.323883	0.072154	FALSE	FALSE	FALSE	FALSE	FALSE	FALSE
[truncated: 89 more rows]

## Sheet: Classified PANTHER Proteins
Accessed June 1, 2025 (https://pantherdb.org) -- See Methods for Parameter Specifications
Accession ID	Info	Description	Description	Protein Class - Specific	Species	Protein Class - Broad
Q9Y2D5				Not Found		Not Found
P42167				Not Found		Not Found
[truncated: 579 more rows]

## Sheet: STRING Scores
Accessed August 4, 2025		minimum interaction score setting: medium confidence
[truncated: 25 more rows]

## Sheet: Overlap of Prot. For Upset Plot
McLean Gene Names Identified by Proximity Proteomics	Chung et al 2017	Killinger et al 2022 (all Syn proteins)	Tanudjojo et al 2021 All Proteins	Griffin et al 2022	Vinueza-Gavilanes et al 2023	Lee et al 2021	Popova et al 2021	Teixeira et al 2025	Converted Accension #s to Gene Name via copy-paste
[truncated: 581 more rows]
