# Supplementary material for: A Split Biotin Ligase Approach to Revealing Proteins Associated with Oligomeric Alpha-Synuclein During Aggregation
Source: Research Square preprint supplement (doi:10.21203/rs.3.rs-7697442/v1), 2025-10-17
Supplement: Supplementary file 1 [file c713f4d9db8dbcdc52565b5f.pdf]

**A Split Biotin Ligase Approach to Revealing Proteins Associated with Oligomeric Alpha-Synuclein During Aggregation**

Analiese R. Fernandes<sup>1,2</sup>, Abigail P. Owen<sup>2,3</sup>, Ayman H. Farooqi<sup>1,2</sup>, Jannifer Lee<sup>2</sup>, Gunveen S. Sachdeva<sup>4</sup>, Dmytro Morderer<sup>2</sup>, Cody Hoffmann<sup>5</sup>, Benjamin Madden<sup>5</sup>, Shuwen Zhang<sup>6</sup>, Yingxue Ren<sup>7</sup>, Suelen L. Boschen<sup>1,2</sup>, Akhilesh Pandey<sup>4</sup>, Wilfried Rossoll<sup>1,2</sup>, Pamela J. McLean<sup>1,2\*</sup>

<sup>1</sup>Mayo Clinic Graduate School of Biomedical Sciences, Jacksonville, FL, USA

<sup>2</sup>Mayo Clinic Department of Neuroscience, Jacksonville, FL, USA

<sup>3</sup>Mayo Clinic Office for Non-Clinical Education Programs, Jacksonville, FL, USA

<sup>4</sup>Mayo Clinic Department of Laboratory Medicine and Pathology, Rochester, MN, USA

<sup>5</sup>Mayo Clinic Proteomics Core, Rochester, MN, USA

<sup>6</sup>Mayo Clinic Department of Quantitative Health Sciences, Rochester, MN, USA

<sup>7</sup>Mayo Clinic Department of Quantitative Health Sciences, Jacksonville, FL, USA

\* Corresponding author

**Correspondence:** [mclean.pamela@mayo.edu](mailto:mclean.pamela@mayo.edu)

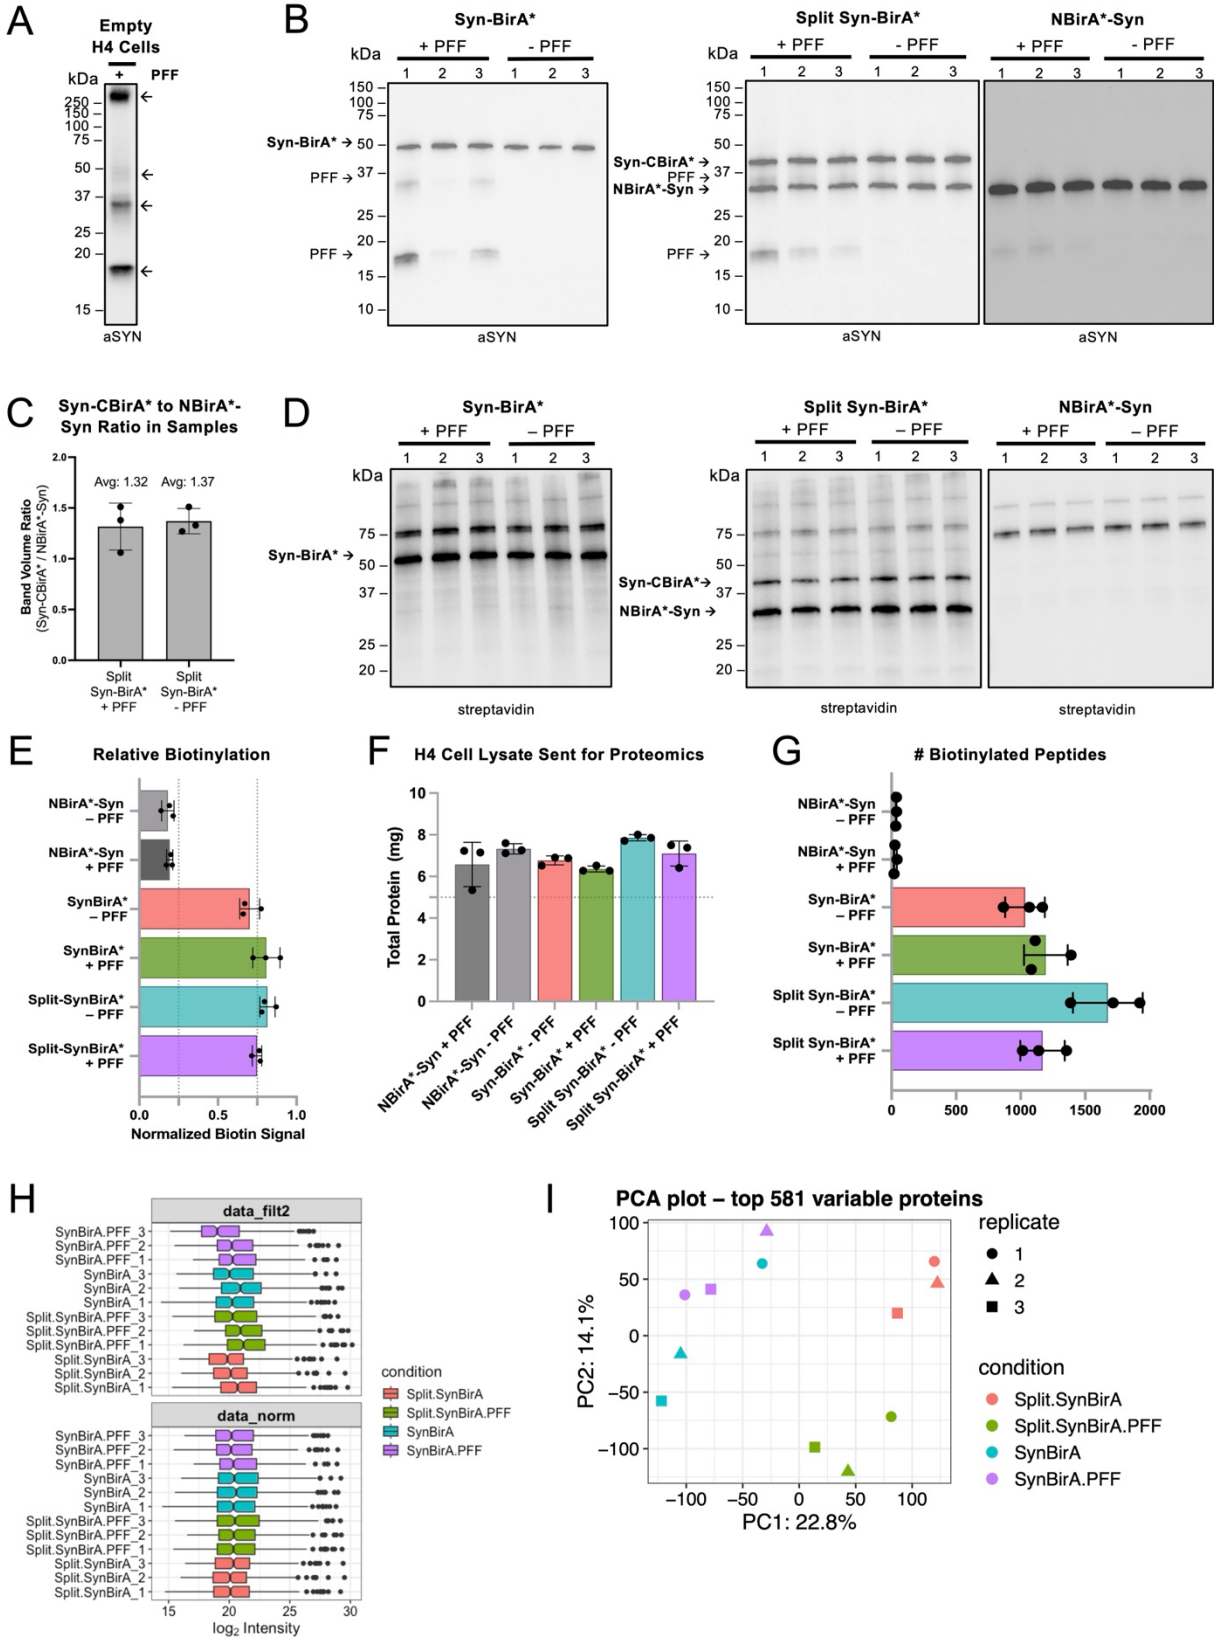

Supplementary Fig. 1 Characterization of Samples Analyzed by Proteomics

**A.** Western blot of cell lysate from construct-free H4 neuroglioma cells treated with human wildtype alpha-Synuclein (aSYN) recombinant pre-formed fibrils (PFF). Probed for aSYN (MJFR1). **B.** Construct expression remained equal across replicates sent for proteomics. Western blot of cell lysate from triplicates of the 6 groups sent for proteomics. Probed for aSYN (MJFR1). Left: seeded (+ PFF) and non-seeded (– PFF) Syn-BirA\*. Center: seeded (+ PFF) and non-seeded (– PFF) Split Syn-BirA\*. Right: seeded (+ PFF) and non-seeded (– PFF) NBirA\*-Syn. All blots demonstrate self-biotinylation of the construct expressed: self-biotinylated Syn-BirA\* at 51kDa (left), self-biotinylated Syn-CBirA\* at 40kDa and NBirA\*-Syn at 27kDa (center) or self-biotinylated NBirA\*-Syn only at 27kDa (right). PFF-specific bands are visible in groups treated with PFFs on all blots. **C.** Quantification of bands from panel B demonstrates ratios of Syn-CBirA\* and NBirA\*-Syn were similar across Split Syn-BirA\* samples. **D.** **E.** Syn-BirA\* and Split Syn-BirA\* cell lines expressing a functioning biotin ligase enzyme demonstrate more overall biotinylation than the negative control cell line, NBirA\*-Syn, expressing an incomplete enzyme fragment. **(D)** Western blot of cell lysate from triplicates of the 6 groups sent for proteomics. Probed for biotin (neutravidin). All blots demonstrate self-biotinylation of the construct expressed. Bands present in NBirA\*-Syn cell lysate correspond with sizes of known endogenously biotinylated proteins: pyruvate carboxylase (130kDa), 3-methylcrotonyl-CoA carboxylase (75kDa), and propionyl-CoA carboxylase (72kDa). **(E)** Quantification of biotinylation signal from each sample in panel D. **F.** For each replicate, a cell pellet containing > 5mg of total protein were sent for BioSITE and LC-MS/MS. **G.** The number of unique biotinylated peptides reported in the raw proteomic data, by group. **H.** Box plots of the proteomic data, by sample, before ('data\_filt2') and after ('data\_norm') normalization. Proteins present in negative control NBirA\*-Syn groups or identified in < 2 of 3 replicates across all groups were excluded prior to normalization. **I.** Principal component analysis (PCA) plot demonstrating clustering among similar samples for the post-processed dataset of 581 proteins.

A



Syn-BirA\*  
N = 342

## Gene Names of Identified Proteins in the Non-Seeded Syn-BirA\* Interactome. Organized by Encoding Protein Class.

## Calcium-Binding Protein

|       |       |         |        |
|-------|-------|---------|--------|
| ANXA2 | EFHD2 | S100A11 | S100A6 |
|-------|-------|---------|--------|

## Cell Junction Protein

|      |      |
|------|------|
| TJP1 | TJP2 |
|------|------|

## Chaperone

|       |      |      |      |        |       |          |          |        |       |       |      |
|-------|------|------|------|--------|-------|----------|----------|--------|-------|-------|------|
| AHSA1 | BAG2 | BAG3 | CCT8 | DNAJB1 | FKBP3 | HSP90AA1 | HSP90AB1 | HSPA1B | HSPA8 | HSPH1 | NPM1 |
| TBCB  |      |      |      |        |       |          |          |        |       |       |      |

## Chromatin/Chr.-Binding/Regulatory Protein

|       |       |        |        |        |       |      |        |     |       |
|-------|-------|--------|--------|--------|-------|------|--------|-----|-------|
| BAZ2A | H2AZ1 | H2BC18 | H2BC21 | H2BC26 | H2BC5 | H3-7 | NAP1L4 | SET | SIN3B |
|-------|-------|--------|--------|--------|-------|------|--------|-----|-------|

H3C1, H3C2, H3C3, H3C4, H3C6, H3C7, H3C8, H3C10, H3C11, H3C12 (Accession ID: P68431)

H4C1, H4C2, H4C3, H4C4, H4C5, H4C6, H4C7, H4C8, H4C9, H4C10, H4C11, H4C12, H4C13, H4C14, H4C15, H4C16 (Accession ID: P62805)

## Cytoskeletal Protein

|         |         |         |        |        |        |        |        |       |        |         |       |
|---------|---------|---------|--------|--------|--------|--------|--------|-------|--------|---------|-------|
| ACTB    | ACTC1   | ANLN    | ARPC1B | CALD1  | CAP1   | CAPG   | CFL1   | CKAP5 | CORO1B | CORO1C  | CSRP1 |
| EPB41   | EPB41L2 | EPB41L3 | EZR    | GSN    | JPT2   | LIMA1  | LIMCH1 | MAP4  | MSN    | MYH13   | MYH9  |
| MYO1B   | NUDC    | NUDCD3  | NUMA1  | PDLIM1 | PDLIM4 | PDLIM5 | PDLIM7 | PFN1  | PLS3   | SEPTIN9 | STMN1 |
| SYNPO2L | TPM3    | TPM4    | TPX2   | TWF1   | VIM    | ZYX    |        |       |        |         |       |

## Defense / Immunity Protein

|         |
|---------|
| ANKRD17 |
|---------|

## DNA Metabolism Protein

|        |      |         |        |      |        |
|--------|------|---------|--------|------|--------|
| BCLAF1 | RPA1 | SMARCA5 | THRAP3 | TRIR | YLP1M1 |
|--------|------|---------|--------|------|--------|

## Extracellular Matrix Protein

|       |       |
|-------|-------|
| MFAP1 | SART1 |
|-------|-------|

## Gene-Specific Transcriptional Regulator

|       |       |         |        |       |        |        |         |         |     |         |       |
|-------|-------|---------|--------|-------|--------|--------|---------|---------|-----|---------|-------|
| AFF4  | GABPA | GATAD2B | HDGFL2 | HMGAI | HMGGB3 | IFI16  | LRRFIP1 | MTA1    | RLF | SAP30BP | STAT1 |
| STAT3 | STAT6 | TEAD1   | TFE3   | THOC2 | TOX4   | ZBTB33 | ZC3H4   | ZNF280C |     |         |       |

## Intercellular Signal Molecule

|                             |
|-----------------------------|
| TMPO (Accession ID: P42166) |
|-----------------------------|

## Membrane Traffic Protein

|       |      |       |        |       |     |       |        |       |      |      |
|-------|------|-------|--------|-------|-----|-------|--------|-------|------|------|
| ARCN1 | BET1 | CHMP5 | CLINT1 | COPG2 | GAK | REPS1 | SEC61B | VAMP1 | VAPA | VAPB |
|-------|------|-------|--------|-------|-----|-------|--------|-------|------|------|

## Metabolite Interconversion Enzyme

|         |       |        |       |     |       |      |       |     |       |         |     |
|---------|-------|--------|-------|-----|-------|------|-------|-----|-------|---------|-----|
| DPYSL4  | G6PD  | GAPDH  | HINT1 | LBR | NAA10 | NME2 | NUDT5 | PKP | PGAM1 | PIP4K2C | PKM |
| PLA2G4A | PRDX1 | TXNRD1 | WWOX  |     |       |      |       |     |       |         |     |

## Protein Modifying Enzyme

|       |        |        |       |      |       |       |       |       |        |       |       |
|-------|--------|--------|-------|------|-------|-------|-------|-------|--------|-------|-------|
| BAZ1B | CACYBP | CUL4B  | HERC4 | PAK2 | PPME1 | PSMD1 | PSMD8 | PTPN1 | TRIM25 | UBE2M | USP15 |
| USP7  | UTRN   | VCPIP1 |       |      |       |       |       |       |        |       |       |

## Protein-Binding Activity Modulator

|          |      |      |       |       |        |        |         |           |       |         |         |
|----------|------|------|-------|-------|--------|--------|---------|-----------|-------|---------|---------|
| ARHGAP35 | CAST | CCNK | CCNT1 | DOCK7 | GAPVD1 | NSFL1C | PPP1R37 | RAB11FIP5 | RABL3 | RANGAP1 | SIPA1L2 |
|----------|------|------|-------|-------|--------|--------|---------|-----------|-------|---------|---------|

## RNA Metabolism Protein

|       |        |        |        |        |        |        |       |         |        |        |       |
|-------|--------|--------|--------|--------|--------|--------|-------|---------|--------|--------|-------|
| ATXN2 | ATXN2L | CSTF2T | DDX42  | DDX46  | DHX9   | GTF2F2 | HDLBP | HNRNPA1 | HNRNPC | KHSRP  | LARP1 |
| NCL   | NONO   | NOP58  | PABPC1 | PCBP2  | PRRC2A | PRRC2C | PSPC1 | SERBP1  | SFPQ   | SNRPD2 | SUB1  |
| SURF6 | TAF1   | TAF7   | TCOF1  | ZC3H7A | ZFR    | ZMAT2  |       |         |        |        |       |

## Scaffold/Adaptor Protein

|        |        |        |          |        |        |       |       |        |         |       |        |
|--------|--------|--------|----------|--------|--------|-------|-------|--------|---------|-------|--------|
| ANKS1A | CACTIN | CD2AP  | CEP152   | CEP170 | CLASRP | DBNL  | DLG1  | DLGAP4 | EHBP1L1 | ENAH  | HNRNPF |
| LRBA   | MAGED1 | MVP    | NCK2     | NUDT21 | NUP50  | PLIN3 | PUF60 | RANBP2 | RANBP3  | RBM17 | RBM39  |
| SF3A1  | SF3B2  | SH3GL1 | SH3PXD2B | SHC1   | SNRPA1 | SNX2  | SUGP1 | TANC1  | XAB2    | YWHAB | ZRANB2 |

## Transfer / Carrier Protein

|        |
|--------|
| OSBPL8 |
|--------|

## Translational Protein

|       |        |        |        |       |       |       |       |       |        |        |        |
|-------|--------|--------|--------|-------|-------|-------|-------|-------|--------|--------|--------|
| ABCF2 | EEF1A1 | EEF1A2 | EEF1B2 | EEF1D | EEF2  | EIF3G | EIF4B | EIF4E | EIF4G1 | EIF4G2 | EIF4G3 |
| EIF4H | EIF5   | EPRS1  | GSPT2  | RARS1 | RPL19 | RPL24 | RPL4  | RPL6  | RPS2   | RPS20  | RPS3A  |

## Transmembrane Signal Receptor

|         |        |
|---------|--------|
| ATP6AP2 | PGRMC2 |
|---------|--------|

## Transporter

|       |         |     |
|-------|---------|-----|
| AP3D1 | PPP4R3A | TPR |
|-------|---------|-----|

## Unclassified

|       |         |        |        |        |        |        |         |          |         |         |         |
|-------|---------|--------|--------|--------|--------|--------|---------|----------|---------|---------|---------|
| AAK1  | ACIN1   | ADNP   | AHNAK  | AHNAK2 | ARGLU1 | ARPC2  | BOD1L1  | C1orf198 | CAMSAP1 | CBX3    | CCDC124 |
| CCDC6 | CDV3    | CKAP4  | CSDE1  | CWC15  | DAP    | DNMBP  | EBAG9   | EMD      | ESF1    | FAM184B | FASN    |
| FHOD1 | FLNB    | GEMIN5 | GNL2   | GSDME  | HCFC1  | HGS    | HNRNPU  | HNRNPUL2 | LASP1   | LMO7    | LUZP1   |
| MTUS1 | NCAPG   | NHLRC2 | NOL11  | NOLC1  | NUCKS1 | NUFIP2 | PAICS   | PCNP     | PDAP1   | PLEKHA1 | PNISR   |
| PNN   | PPP1R18 | PTMA   | PUS7   | RAI14  | RBM10  | RCC2   | RNF213  | RP9      | RUFY1   | RUVBL1  | SAFB    |
| SAMD9 | SLTM    | SMAP   | SMC4   | SND1   | SP100  | SRPK1  | STBD1   | STEEP1   | STIP1   | TAGLN2  | TLN1    |
| TMA7  | TMEM109 | UBXN4  | UNC45A | UVSSA  | VMA12  | ZC3H18 | ZC3HAV1 | ZC3HC1   | ZFAND3  | ZMYND8  | ZNF609  |

## Not Found

|            |
|------------|
| PALM2AKAP2 |
|------------|

|                             |
|-----------------------------|
| TMPO (Accession ID: P42167) |
|-----------------------------|

**Supplementary Fig. 2 Proximal Proteome of Unseeded Monomeric and Multimeric aSYN**

**A.** Gene names of the 342 identified proteins proximal to non-seeded Syn-BirA\*, organized by encoding protein class. Proteins included were identified in  $\geq 2$  of 3 replicates. Protein classes were queried through PANTHER Database v19.

A

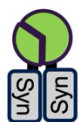Split  
Syn-BirA\*

N = 487

| Gene Names of Identified Proteins in the Non-Seeded Split Syn-BirA* Interactome. Organized by Encoding Protein Class.        |          |          |                                   |                               |                                                  |          |         |                                     |        |                                      |                             |
|------------------------------------------------------------------------------------------------------------------------------|----------|----------|-----------------------------------|-------------------------------|--------------------------------------------------|----------|---------|-------------------------------------|--------|--------------------------------------|-----------------------------|
| <b>Calcium-Binding Protein</b>                                                                                               |          |          |                                   |                               | <b>Cell Junction Protein</b>                     |          |         | <b>Cell Adhesion Molecule</b>       |        |                                      |                             |
| ANXA1                                                                                                                        | ANXA2    | EFHD2    | S100A11                           | S100A6                        | TJP1                                             | TJP2     |         | DSG2                                | ITGB1  |                                      |                             |
| <b>Chaperone</b>                                                                                                             |          |          |                                   |                               | <b>Chromatin/Chr.-Binding/Regulatory Protein</b> |          |         |                                     |        |                                      |                             |
| AHSA1                                                                                                                        | BAG3     | CCT8     | CLIP1                             | DNAJB1                        | BAZ2A                                            | CHD7     | CHD8    | H2AZ1                               | H2BC18 | H2BC21                               |                             |
| DNAJC13                                                                                                                      | DNAJC8   | FKBP3    | HSP90AA1                          | HSP90AB1                      | H2BC26                                           | H2BC5    | H3-7    | H4C1                                | JMJD1C | KMT2B                                |                             |
| HSPA1B                                                                                                                       | HSPA8    | NASP     | NPM1                              | TBCB                          | NAP1L4                                           | NCOR2    | SAP130  | SCML2                               | SIN3B  |                                      |                             |
| H4C1, H4C2, H4C3, H4C4, H4C5, H4C6, H4C7, H4C8, H4C9, H4C10, H4C11, H4C12, H4C13, H4C14, H4C15, H4C16 (Accession ID: P62805) |          |          |                                   |                               |                                                  |          |         |                                     |        |                                      |                             |
| <b>Cytoskeletal Protein</b>                                                                                                  |          |          |                                   |                               |                                                  |          |         |                                     |        |                                      |                             |
| ACTB                                                                                                                         | ACTC1    | ACTN4    | ADD2                              | AFDN                          | ANLN                                             | ARPC3    | CALD1   | CAP1                                | CAPG   | CFL1                                 | CKAP5                       |
| CLASP1                                                                                                                       | CORO1C   | CSR1     | CTNND1                            | EPB41                         | EPB41L2                                          | EPB41L3  | EVPL    | EZR                                 | GSN    | JPT1                                 | JPT2                        |
| KIF15                                                                                                                        | KIF20B   | KIF5B    | KRT18                             | LIMA1                         | LIMCH1                                           | MACF1    | MAP1A   | MAP1B                               | MAP4   | MAPRE2                               | MPRIIP                      |
| MSN                                                                                                                          | MYH9     | MYL12B   | MYO1B                             | NUDC                          | NUMA1                                            | PARVA    | PDLIM1  | PDLIM4                              | PDLIM5 | PDLIM7                               | PFN1                        |
| PLS3                                                                                                                         | RDX      | SEPTIN2  | SEPTIN9                           | SPTAN1                        | SPTBN1                                           | STMN1    | SYNPO2L | TMSB10                              | TPM1   | TPM3                                 | TPM4                        |
| TPX2                                                                                                                         | TWF1     | VIM      | ZYX                               |                               |                                                  |          |         |                                     |        |                                      |                             |
| <b>Defense / Immunity Protein</b>                                                                                            |          |          |                                   | <b>DNA Metabolism Protein</b> |                                                  |          |         | <b>Extracellular Matrix Protein</b> |        |                                      |                             |
| ANKRD17                                                                                                                      |          |          |                                   | BCLAF1                        | FEN1                                             | MLH1     | PRIM2   | RPA1                                | MFAP1  | SART1                                |                             |
|                                                                                                                              |          |          |                                   | SMARCA1                       | SMARCA5                                          | THRAP3   | TRIR    |                                     |        |                                      |                             |
| <b>Gene-Specific Transcriptional Regulator</b>                                                                               |          |          |                                   |                               |                                                  |          |         |                                     |        | <b>Intercellular Signal Molecule</b> |                             |
| AFF4                                                                                                                         | AHR      | ATF7IP   | BTF3                              | EMSY                          | GATAD2B                                          | HDGF     | HMGAI   |                                     |        | IK                                   |                             |
| HMGB3                                                                                                                        | HSF1     | IFI16    | LRRFIP1                           | MTA1                          | RLF                                              | SAP30BP  | STAT1   |                                     |        | TMPO (Accession ID: P42166)          |                             |
| STAT3                                                                                                                        | TEAD1    | TFE3     | TOX4                              | ZBTB33                        | ZC3H15                                           | ZNF148   | ZNF451  |                                     |        |                                      |                             |
| ZNF93                                                                                                                        |          |          |                                   |                               |                                                  |          |         |                                     |        |                                      |                             |
| <b>Membrane Traffic Protein</b>                                                                                              |          |          |                                   |                               |                                                  |          |         |                                     |        |                                      |                             |
| ARCN1                                                                                                                        | ARFIP1   | BCAP31   | BET1                              | BET1L                         | CHMP4B                                           | CHMP5    | CLINT1  | CLTA                                | COPG2  | ERC1                                 | ESYT1                       |
| ESYT2                                                                                                                        | GAK      | IGF2R    | REPS1                             | SDCBP                         | SEC61B                                           | SNCB     | VAMP1   | VAPA                                | VAPB   |                                      |                             |
| <b>Metabolite Interconversion Enzyme</b>                                                                                     |          |          |                                   |                               |                                                  |          |         |                                     |        |                                      |                             |
| ADSL                                                                                                                         | ALDH3A2  | ALG13    | DPYSL4                            | G6PD                          | GAPDH                                            | GFPT1    | HINT1   | HLCS                                | KYNU   | NME2                                 | NMT1                        |
| NUDT5                                                                                                                        | PFKP     | PGAM1    | PIP4K2C                           | PKM                           | PLA2G4A                                          | PIIP5K2  | PRDX1   | TXNRD1                              | WWOX   |                                      |                             |
| <b>Phosphatase</b>                                                                                                           |          |          | <b>Protein Modifying Enzyme</b>   |                               |                                                  |          |         |                                     |        |                                      |                             |
| INPP5F                                                                                                                       |          |          | ATG3                              | BAZ1B                         | CACYBP                                           | CUL4B    | FER     | HERC4                               | MAP4K4 | NEDD4L                               | NRBP1                       |
|                                                                                                                              |          |          | PAK2                              | PAK4                          | PPME1                                            | PPP1CB   | PSMD1   | PSMD12                              | PSMD2  | PSMD8                                | PTPN1                       |
|                                                                                                                              |          |          | RFPL4A                            | RIPK2                         | SYVN1                                            | TRIM25   | TRIM56  | UBE2M                               | UBE2O  | USP7                                 | UTRN                        |
|                                                                                                                              |          |          |                                   |                               |                                                  |          |         |                                     |        |                                      | VCPIP1                      |
| <b>Protein-Binding Activity Modulator</b>                                                                                    |          |          |                                   |                               |                                                  |          |         |                                     |        |                                      |                             |
| ARF3                                                                                                                         | ARFGAP1  | ARHGAP1  | ARHGAP35                          | CAST                          | CCNK                                             | CCNT1    | DOCK7   | GAPVD1                              | NSFL1C | PDCD5                                | RAB11FIP5                   |
| RAB1A                                                                                                                        | RAB3GAP1 | RABL3    | RAN                               | RANGAP1                       | SIPA1L2                                          | TRIO     |         |                                     |        |                                      |                             |
| <b>RNA Metabolism Protein</b>                                                                                                |          |          |                                   |                               |                                                  |          |         |                                     |        |                                      |                             |
| ATXN2L                                                                                                                       | CSTF2    | CSTF2T   | DDX10                             | DDX3X                         | DDX42                                            | DDX46    | DHX36   | DHX9                                | DIDO1  | EIF4A1                               | FUS                         |
| G3BP1                                                                                                                        | GTF2F1   | GTF2F2   | GTF2I                             | GTF3C5                        | HNRNPA1                                          | IGF2BP3  | KHSRP   | LARP1                               | LSM14A | NCL                                  | NONO                        |
| NOP58                                                                                                                        | PCBP2    | PES1     | PRRC2A                            | PRRC2C                        | PSPC1                                            | RBM26    | SERBP1  | SFPQ                                | SNRPD2 | SPEN                                 | SUB1                        |
| TAF1                                                                                                                         | TAF7     | TARDBP   | TCOF1                             | U2SURP                        | YTHDC2                                           | ZC3H7A   | ZFR     | ZMAT2                               |        |                                      |                             |
| <b>Scaffold/Adaptor Protein</b>                                                                                              |          |          |                                   |                               |                                                  |          |         |                                     |        |                                      |                             |
| ABI1                                                                                                                         | AIMP2    | ANKS1A   | CACTIN                            | CD2AP                         | CEP152                                           | CEP170   | CHORDC1 | CLASRP                              | DBNL   | DLG1                                 | DLGAP4                      |
| EHBP1                                                                                                                        | EHBP1L1  | ENAH     | GCN1                              | HNRNP                         | HP1BP3                                           | LRBA     | MAGED1  | MAGED2                              | MVP    | NCK2                                 | NUP50                       |
| PLIN3                                                                                                                        | PRPF3    | PUF60    | RANBP1                            | RANBP2                        | RANBP3                                           | RBM17    | RBM39   | RRBP1                               | SART3  | SF3A1                                | SF3B2                       |
| SH3D19                                                                                                                       | SH3GL1   | SH3PXD2B | SNRPA1                            | SNRPGP15                      | SNX1                                             | SNX4     | SON     | SUGP1                               | TANC1  | XAB2                                 | YWHA8                       |
| ZRANB2                                                                                                                       |          |          |                                   |                               |                                                  |          |         |                                     |        |                                      |                             |
| <b>Structural Protein</b>                                                                                                    |          |          | <b>Transfer / Carrier Protein</b> |                               |                                                  |          |         |                                     |        |                                      |                             |
| CRYBG1                                                                                                                       |          |          | OSBPL11                           | OSBPL8                        |                                                  |          |         |                                     |        |                                      |                             |
| <b>Translational Protein</b>                                                                                                 |          |          |                                   |                               |                                                  |          |         |                                     |        |                                      |                             |
| ABCF2                                                                                                                        | EEF1A1   | EEF1A2   | EEF1B2                            | EEF1D                         | EEF2                                             | EIF3G    | EIF3H   | EIF4B                               | EIF4E  | EIF4G1                               | EIF4G2                      |
| EIF4G3                                                                                                                       | EIF4H    | EIF5     | EPRS1                             | GSPT2                         | RARS1                                            | RPL19    | RPL24   | RPL6                                | RPS2   | RPS20                                | RPS3A                       |
| TARS1                                                                                                                        |          |          |                                   |                               |                                                  |          |         |                                     |        |                                      |                             |
| <b>Transmembrane Signal Receptor</b>                                                                                         |          |          |                                   | <b>Transporter</b>            |                                                  |          |         |                                     |        |                                      |                             |
| GPRC5A                                                                                                                       | PGRMC2   | TMEM87A  |                                   | ATP11B                        | CCAR2                                            | NUP214   | NUP98   | TPR                                 | VCP    |                                      |                             |
| <b>Unclassified</b>                                                                                                          |          |          |                                   |                               |                                                  |          |         |                                     |        |                                      |                             |
| AAK1                                                                                                                         | ACIN1    | ADNP     | AGFG1                             | AHNAK                         | AHNAK2                                           | ALMS1    | AP1AR   | ATIC                                | BOD1L1 | C1orf198                             | C2CD2                       |
| CBX3                                                                                                                         | CCDC124  | CCDC50   | CCZ1B                             | CDV3                          | CISD2                                            | CKAP4    | CNN2    | COMMD8                              | CSDE1  | CWC15                                | DAP                         |
| DBN1                                                                                                                         | DNMBP    | EGLN1    | EMD                               | ENSA                          | ESF1                                             | FAM107B  | FASN    | FIP1L1                              | FLNB   | GEMIN5                               | GSDME                       |
| HCFC1                                                                                                                        | HGS      | HIVEP1   | HNRNPU                            | HNRNPUL1                      | IWS1                                             | KNL1     | LASP1   | LMO7                                | LSM12  | LUZP1                                |                             |
| MIA                                                                                                                          | MTDH     | MTUS1    | NBR1                              | NCAPG                         | NCAPH                                            | NEDD8    | NELFE   | NHLRC2                              | NKAPD1 | NOL11                                | NUCKS1                      |
| NUFIP2                                                                                                                       | PAICS    | PCNP     | PDAP1                             | PLEKHA1                       | PNISR                                            | PNN      | PPP1R10 | PPP1R18                             | PTMA   | PTPN12                               | PUS7                        |
| RAI14                                                                                                                        | RBM10    | RBM33    | RCC2                              | RIC8A                         | RP9                                              | RUFY1    | RUVBL1  | SAFB                                | SAMD9  | SKA3                                 | SLAIN2                      |
| SLTM                                                                                                                         | SMAP     | SMC4     | SND1                              | SP100                         | SQSTM1                                           | SRP72    | SRRM2   | STBD1                               | STEEP1 | STIP1                                | SYMPK                       |
| SYNM                                                                                                                         | TACC3    | TAGLN2   | THOC7                             | TLN1                          | TMA7                                             | TNKS1BP1 | UBAP2L  | UFD1                                | UNC45A | VCL                                  | VMA12                       |
| WBP11                                                                                                                        | WDR36    | YKT6     | ZC3H18                            | ZC3HC1                        | ZDBF2                                            | ZMYND8   | ZNF318  |                                     |        |                                      |                             |
| <b>Not Found</b>                                                                                                             |          |          |                                   |                               |                                                  |          |         |                                     |        |                                      |                             |
| PALM2AKAP2                                                                                                                   |          |          |                                   |                               |                                                  |          |         |                                     |        |                                      | TMPO (Accession ID: P42167) |

Supplementary Fig. 3 Proximal Proteome of Unseeded Multimeric Only aSYN

**A.** Gene names of the 487 identified proteins proximal to non-seeded Split Syn-BirA\*, organized by encoding protein class. Proteins included were identified in  $\geq 2$  of 3 replicates. Protein classes were queried through PANTHER Database v19. These proteins represent potential interactors of physiologically healthy multimeric aSYN.

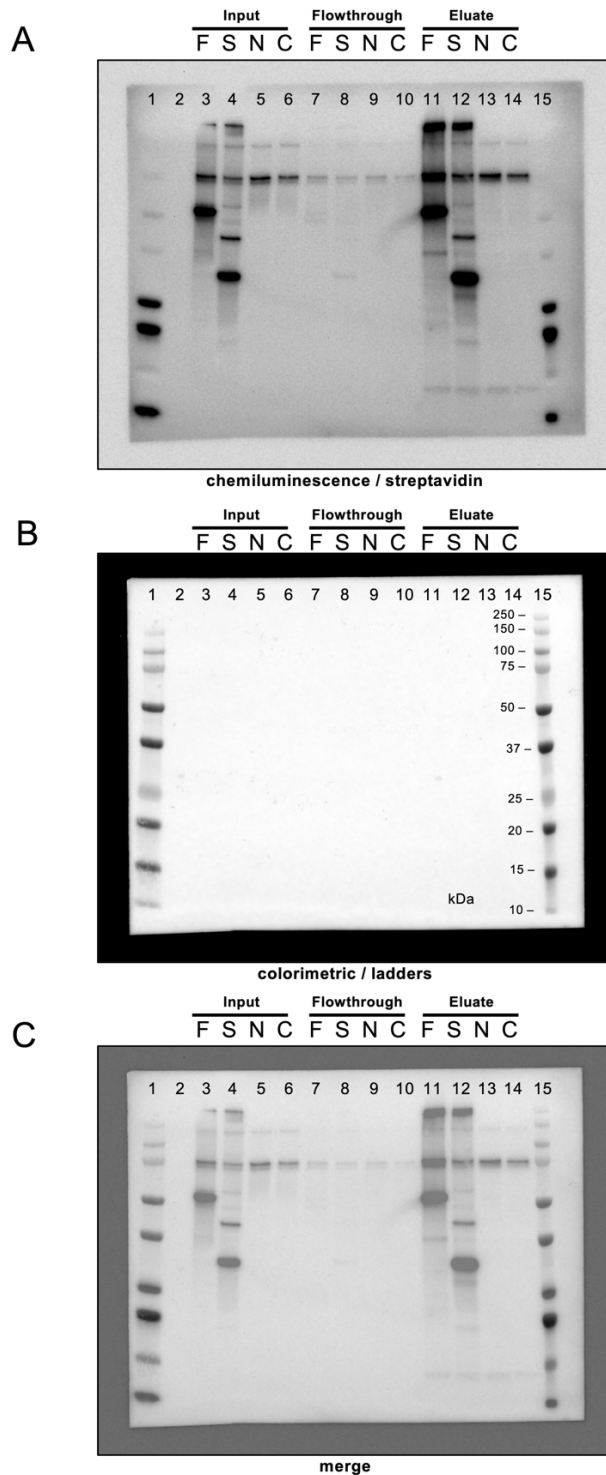

**Supplementary Fig. 4 Uncropped Blot from Figure 1D Demonstrating Enrichment of Biotinylated Proteins**

Lanes 11-14 were shown in the main text to highlight the biotinylated proteins found in lysates after streptavidin enrichment. Lanes 1 & 15 are ladders. Lane 2 is blank (no sample). Lanes 3-6 represent starting H4 stable cell lysate for pulldown (aka “input”) for Syn-BirA\* (“F”), Split Syn-BirA\* (“S”), NBirA\*-Syn (“N”) and Syn-CBirA\* (“C”).



Lanes 7-10 represent the flowthrough from the streptavidin pulldown; these samples are expected to show reduced levels of biotinylated proteins. Lanes 11-14 represent final enriched biotinylated proteins (aka “eluate”). **A.** Chemiluminescence only imaging showing anti-streptavidin HRP signal. **B.** Colormetric only imaging to visualize the ladder. **C.** Merge of blots from (A) and (B). Blot was not moved between colorimetric and chemiluminescent imaging.

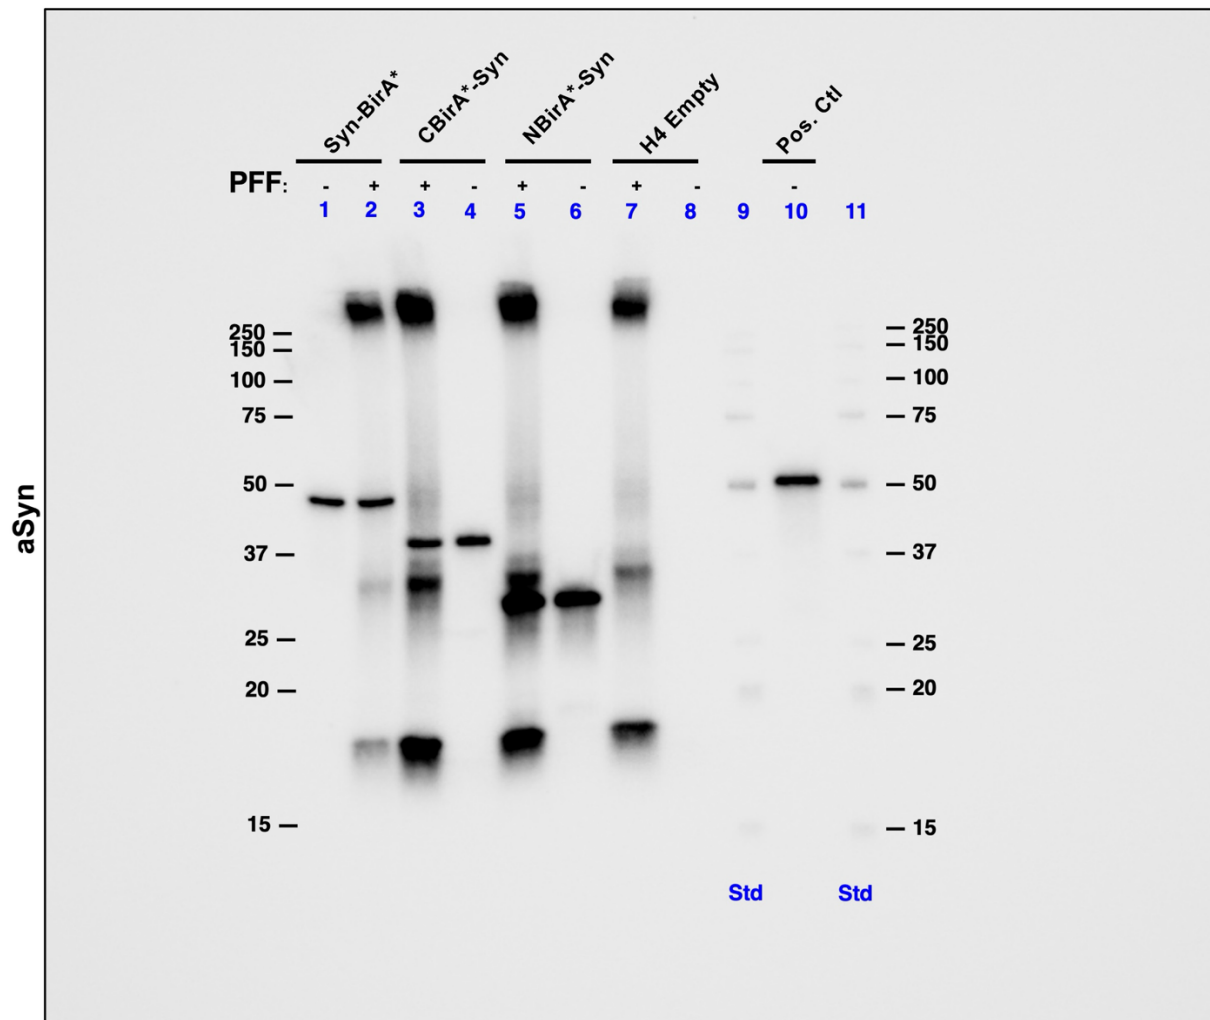

### Supplementary Fig. 5 Uncropped Blot Demonstrating PFF-associated Bands

Uncropped blots used for Supp. Figure 1A. Lane 7 was chosen for Supplementary Figure 1A to demonstrate bands associated with the addition of pre-formed fibrils (PFFs) in H4 cells lacking the expression of a BirA\* construct. Lanes 9 & 11 are ladders. Lanes 1, 4, 6 and 8 represent H4 cell lysates no fibrils added. Lanes 2, 3, 5 and 7 represent H4 cell lysates with the addition of PFFs. H4 Empty Cells had no construct integration or expression. Lane 10 represents a western blot positive control using Syn-BirA\* cell lysate generated during a prior experiment. This control ensured the western blot procedure worked as expected and was not relevant to subsequent analysis of the blot. Chemiluminescence imaging was used.

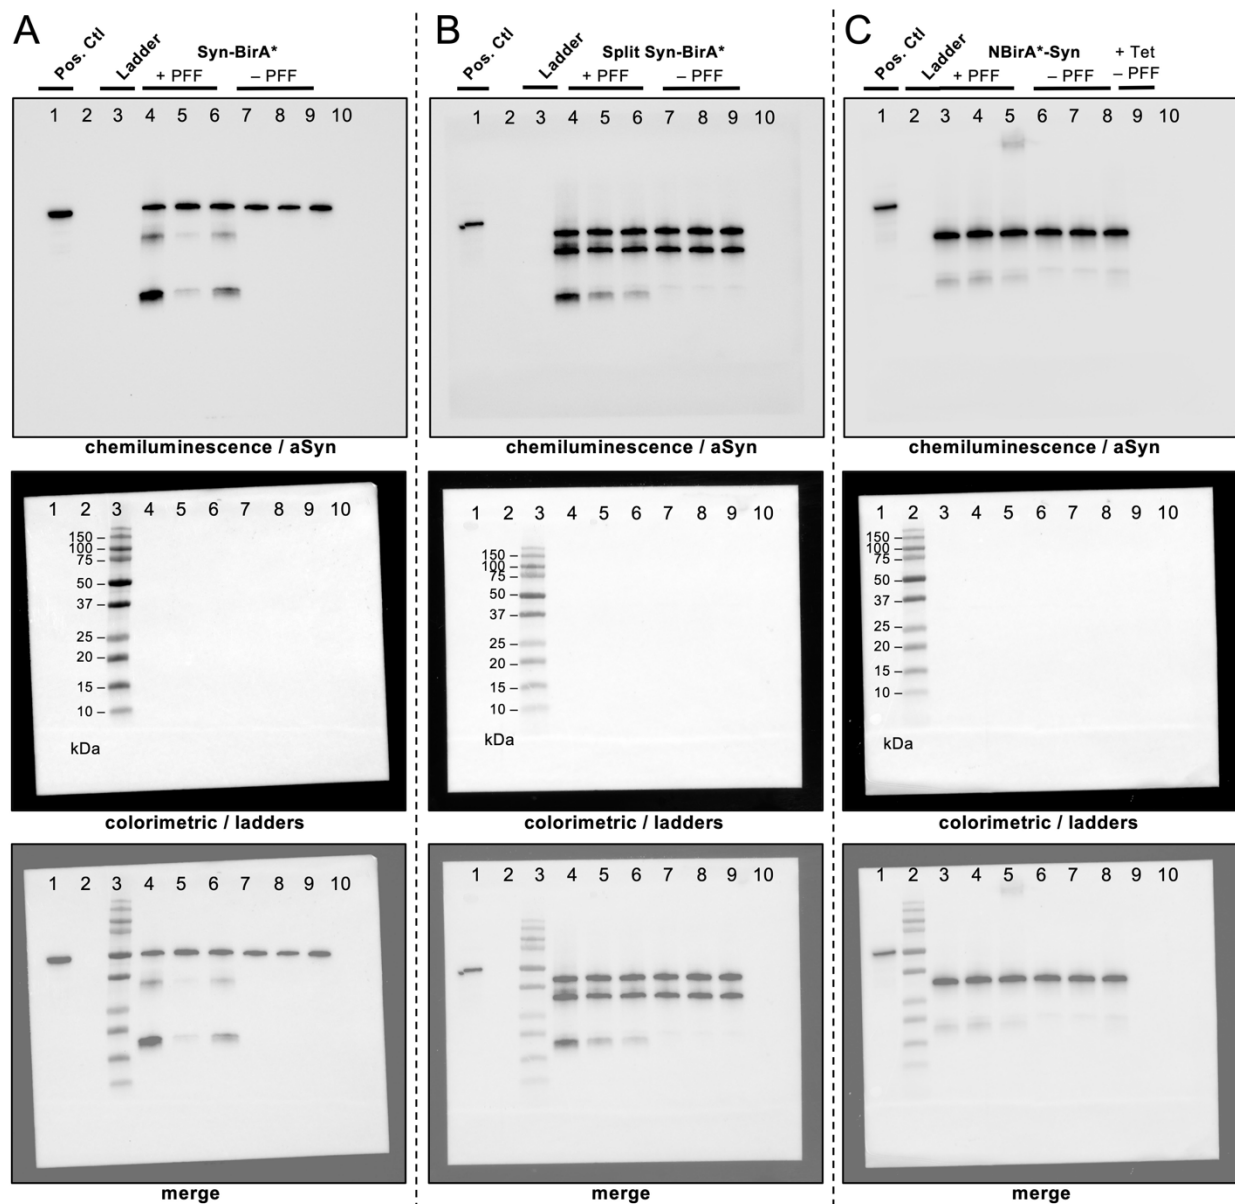

### Supplementary Fig. 6 Uncropped anti-aSyn Blots of Samples Analyzed by Proteomics

Uncropped blots used for Supp. Figure 1B. Three blots (panels A-C) were visualized via chemiluminescent imaging for the probe of interest (top), colorimetric imaging to visualize ladders (middle), and the merged images were used for analysis (bottom). In all blots, Lane 1 represents a western blot positive control using cell lysate generated during a prior experiment. This control ensured the western blot procedure worked as expected and was not relevant to subsequent analysis of the blot. Lane 10 was blank in all blots. Lysate from Syn-BirA\* (**A**), Split Syn-BirA\* (**B**) and NBirA\*-Syn (**C**) samples analyzed by proteomics were run on western blot and probed for aSyn via

chemiluminescent imaging. Blots were not moved between colorimetric and chemiluminescent imaging. **C.** An additional cell lysate – H4 NBirA\*-Syn cells + tetracycline was run on western blot (Panel C, Lane 9) demonstrating that no construct was expressed in the presence of tetracycline.

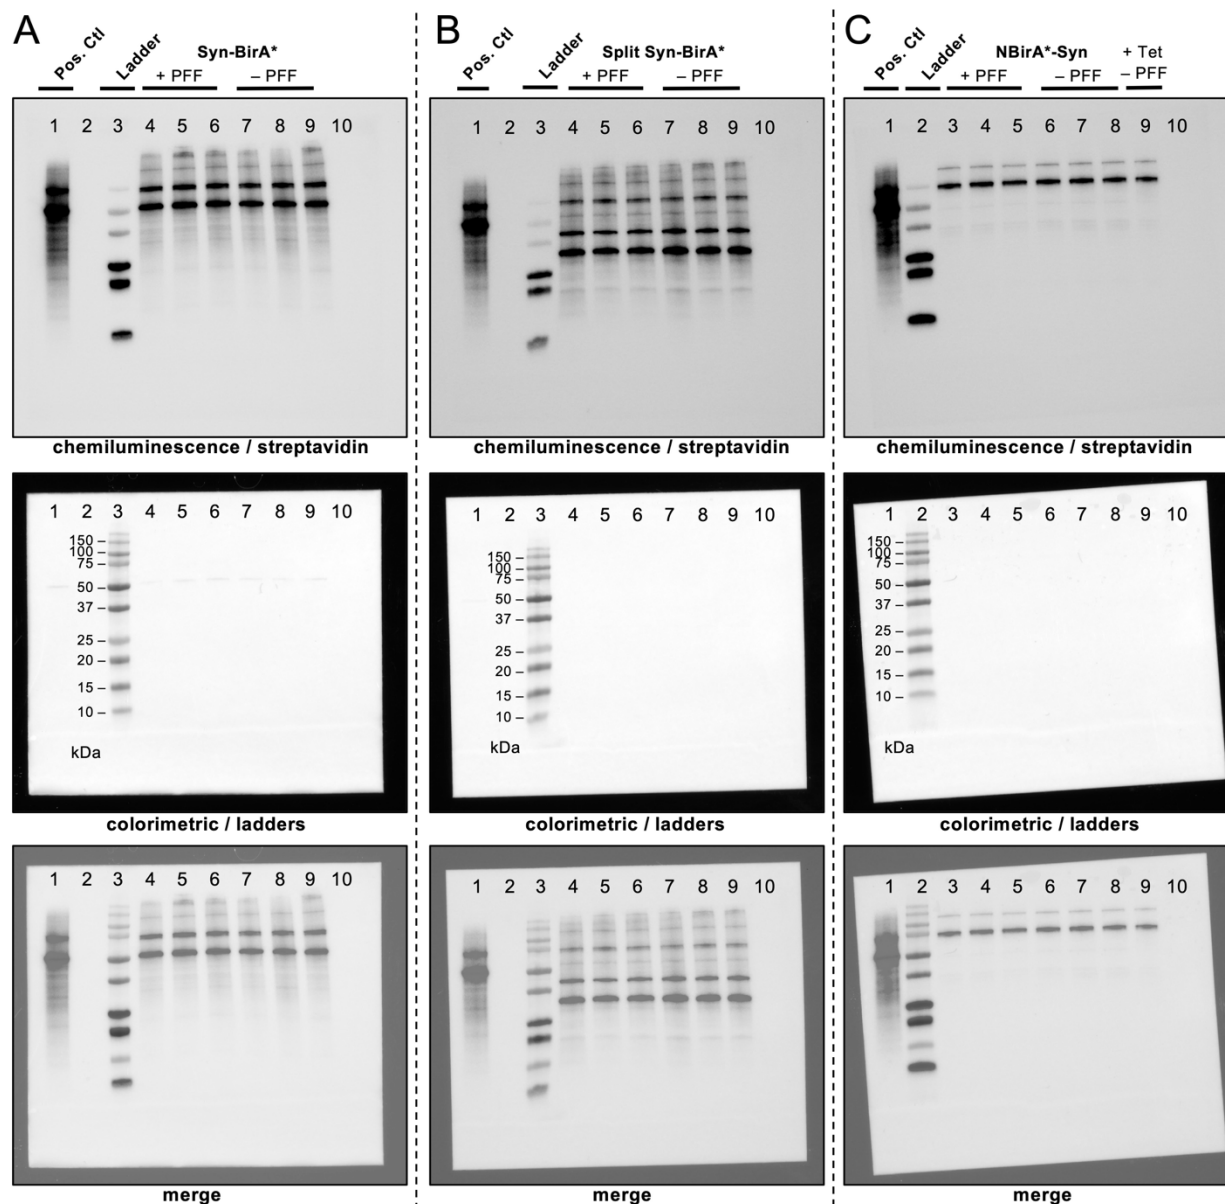

**Supplementary Fig. 7 Uncropped Biotinylated Protein Blots of Samples Analyzed by Proteomics**

Uncropped blots used for Supp. Figure 1D. Three blots (panels A-C) were visualized via chemiluminescent imaging for the probe of interest (top), colorimetric imaging to visualize ladders (middle), and the merged images were used for analysis (bottom). In all blots, Lane 1 represents a western blot positive control using cell lysate generated during a prior experiment. This control ensured the western blot procedure worked as expected and was not relevant to subsequent analysis of the blot. Lane 10 was blank in all blots. Lysate from Syn-BirA\* (A), Split Syn-BirA\* (B) and NBirA\*-Syn (C) samples analyzed by proteomics were run on western blot and probed for biotinylated proteins via

chemiluminescent imaging using streptavidin-HRP. Blots were not moved between colorimetric and chemiluminescent imaging. **C.** An additional cell lysate – H4 NBirA\*-Syn cells + tetracycline was run on western blot (Panel C, Lane 9) demonstrating that endogenous biotinylation detected was not noticeably different with or without NBirA\*-Syn expression.
